# Supplementary material for: Impact of Different Trace Elements on the Growth and Proteome of Two Strains of Granulicella, Class “Acidobacteriia”
Source: Front Microbiol. 2020 Jun 18;11:1227. doi: 10.3389/fmicb.2020.01227 (PMC7315648; doi:10.3389/fmicb.2020.01227)
Supplement: Supplementary file 3 [file Data_Sheet_3.xlsx]

## Sheet: strain 5B5
TABLE S4 | Proteomic profile of Granulicella strains 5B5 and WH15 under manganese treatment proteome. Proteins were mapped to COG and KEGG IDs using the COG database (2014 release) (Galperin et al., 2015) and KEGG database (release 2013) (Kanehisa, 2000), using eggNOG mapper.
		Function					normalized spectrum abundance factor (NSAF)						t-test	mean NSAF		ratio	log2 ratio	replicate count
Identified Proteins	Accession Number	main role	subrole	KEGG	COG	Molecular Weight	5B5-co1	5B5-co2	5B5-co3	5B5-Mn4	5B5-Mn5	5B5-Mn6	significant	co	Mn	Mn/co	Mn/co	repl co	repl Mn	expression
Transcriptional regulator YqjI	G5B5_06260	Information storage and processing	Transcription	-	K	23 kDa	0.0086067	0.010771	0.010954	0.0035158	0.0018075	0.0018414	1	0.0101106	0.00238823	0.236212	-2.08185	3	3
Protein-export membrane protein SecG	G5B5_01280	Cellular processing and signaling	Intracellular trafficking, secretion, and vesicular transport	K03075	U	10 kDa	0.00054873	0.00030368		0.00017091			0	0.000426205	0.00017091	0.401004	-1.31831	2	1
F420-dependent glucose-6-phosphate dehydrogenase	G5B5_07500	Metabolism	Energy production and conversion	-	C	40 kDa			0.00023806	0.00013635	7.2602e-05	8.6288e-05	0	0.00023806	9.84133e-05	0.413397	-1.2744	1	3
2,3-diketo-L-gulonate reductase	G5B5_08770	Metabolism	Energy production and conversion	K08092	C	36 kDa	0.00010209	0.00014125	0.00012491		5.0793e-05		0	0.00012275	5.0793e-05	0.413792	-1.27302	3	1
hypothetical protein	G5B5_09675	Poorly characterized	Function unknown	K00469	S	34 kDa		0.00013591		5.7367e-05			0	0.00013591	5.7367e-05	0.422096	-1.24436	1	1
Methionine synthase	G5B5_02465	Metabolism	Amino acid transport and metabolism	K00548	E	101 kDa		6.3654e-05		1.7912e-05	3.815e-05		0	6.3654e-05	2.8031e-05	0.440365	-1.18323	1	2
1-(5-phosphoribosyl)-5-[(5-phosphoribosylamino)methylideneamino] imidazole-4-carboxamide isomerase	G5B5_13220	Metabolism	Amino acid transport and metabolism	K01814	E	24 kDa	0.00023517	0.00021692	0.00019183	0.00021974	0.00019501	0.00027813	0	0.00021464	0.00023096	1.07603	0.105724	3	3
1,4-alpha-glucan branching enzyme	G5B5_13995	Metabolism	Carbohydrate transport and metabolism	K16149	G	68 kDa	0.0009001	0.00081662	0.00064995	0.00095133	0.00091035	0.00045373	0	0.00078889	0.000771803	0.978341	-0.0315909	3	3
1,4-alpha-glucan branching enzyme GlgB	G5B5_00105	Metabolism	Carbohydrate transport and metabolism	K00690,K01187,K05343	G	130 kDa	0.00072214	0.00122	0.00057664	0.00091623	0.0009455	0.00055738	0	0.000839593	0.00080637	0.960429	-0.0582487	3	3
Acylphosphatase	G5B5_11680	Metabolism	Energy production and conversion	K01512	C	10 kDa	0.00037762			0.00017642			0	0.00037762	0.00017642	0.467189	-1.09792	1	1
1,4-beta-D-glucan glucohydrolase	G5B5_06585	Metabolism	Carbohydrate transport and metabolism	K05350	G	54 kDa	0.00061803	0.00058347	0.0004893	0.00047556	0.00065116	0.00058044	0	0.0005636	0.000569053	1.00968	0.0138923	3	3
1,4-dihydroxy-6-naphtoate synthase	G5B5_00380	Poorly characterized	Function unknown	K07083,K11785	S	32 kDa	0.002875	0.0025321	0.0033286	0.0024553	0.002461	0.0025958	0	0.0029119	0.00250403	0.859931	-0.217707	3	3
10 kDa chaperonin 1	G5B5_13550	Cellular processing and signaling	Post-translational modification, protein turnover, and chaperones	K04078	O	11 kDa	0.025174	0.0076354	0.010304	0.010798	0.013461	0.013668	0	0.0143711	0.0126423	0.879703	-0.184911	3	3
Cyclopentanol dehydrogenase	G5B5_14515	Poorly characterized	Function unknown	-	S	26 kDa	7.1965e-05		0.00022013		7.161e-05		0	0.000146048	7.161e-05	0.49032	-1.0282	2	1
UDP-N-acetylglucosamine 1-carboxyvinyltransferase	G5B5_02315	Cellular processing and signaling	Cell wall/membrane/envelope biogenesis	K00790	M	45 kDa	6.1829e-05	9.1247e-05		3.8514e-05			0	7.6538e-05	3.8514e-05	0.503201	-0.990793	2	1
hypothetical protein	G5B5_04865	unclassified	unclassified	-	-	32 kDa		0.00010229	0.00018846	5.7568e-05		7.2866e-05	1	0.000145375	6.5217e-05	0.448612	-1.15646	2	2
50S ribosomal protein L31	G5B5_10710	Information storage and processing	Translation, ribosomal structure and biogenesis	K02909	J	9 kDa	0.00086713	0.00083981			0.00043143		0	0.00085347	0.00043143	0.505501	-0.984214	2	1
hypothetical protein	G5B5_12975	Metabolism	Energy production and conversion	-	C	51 kDa	0.00011552	0.00012787	0.00014135	5.397e-05	7.6636e-05	4.5541e-05	1	0.000128247	5.87157e-05	0.457834	-1.1271	3	3
1-deoxy-D-xylulose-5-phosphate synthase	G5B5_00605	Metabolism	Energy production and conversion	K11381	C	83 kDa	0.00075322	0.00082067	0.00093599	0.00070378	0.00079635	0.00075161	0	0.000836627	0.00075058	0.89715	-0.156578	3	3
1-deoxy-D-xylulose-5-phosphate synthase	G5B5_05165	Metabolism	Coenzyme transport and metabolism	K01662	H	16 kDa	0.00011864	0.00013132	0.00014517	0.00011086	0.00011806	0.00021047	0	0.00013171	0.000146463	1.11201	0.153175	3	3
1-pyrroline-5-carboxylate dehydrogenase 2	G5B5_00195	Metabolism	Energy production and conversion	K00128,K00294,K13821	C	57 kDa	0.00023148	0.00023791	0.00022253	0.00026263	0.00019743	0.00023465	0	0.00023064	0.00023157	1.00403	0.00580562	3	3
2,3,4,5-tetrahydropyridine-2,6-dicarboxylate N-succinyltransferase	G5B5_04020	Metabolism	Amino acid transport and metabolism	K00674,K05822	E	31 kDa	0.00090512	0.0011354	0.0020672	0.0013532	0.0010808	0.000785	0	0.00136924	0.001073	0.783646	-0.351725	3	3
2,3-bisphosphoglycerate-dependent phosphoglycerate mutase	G5B5_07620	Poorly characterized	Function unknown	-	S	23 kDa	0.00069542	0.00072162	0.0007977	0.00056856	0.00056225	0.00077104	0	0.000738247	0.00063395	0.858724	-0.219734	3	3
2,3-bisphosphoglycerate-independent phosphoglycerate mutase	G5B5_02145	Metabolism	Carbohydrate transport and metabolism	K15633	G	59 kDa	0.00063763	0.00081434	0.00074016	0.00061106	0.00081345	0.00067676	0	0.00073071	0.000700423	0.958552	-0.0610718	3	3
ABC transporter ATP-binding protein uup	G5B5_15150	Poorly characterized	Function unknown	K15738	S	67 kDa			5.2918e-05		2.8691e-05		0	5.2918e-05	2.8691e-05	0.542178	-0.88316	1	1
hypothetical protein	G5B5_00540	Metabolism	Carbohydrate transport and metabolism	K01051	G	40 kDa	0.00021649	0.00018637	0.00017659	8.9901e-05	9.5742e-05	8.5343e-05	1	0.00019315	9.03287e-05	0.467661	-1.09647	3	3
2-C-methyl-D-erythritol 4-phosphate cytidylyltransferase	G5B5_03315	Metabolism	Lipid transport and metabolism	K00991,K12506	I	25 kDa	0.0007504	0.00066447	0.0014231	0.0010167	0.00082138	0.0010206	0	0.00094599	0.000952893	1.0073	0.0104898	3	3
Alpha-galactosidase A	G5B5_05445	Metabolism	Carbohydrate transport and metabolism	K07407	G	43 kDa			0.00010851	6.2148e-05	6.6185e-05	5.2441e-05	0	0.00010851	6.0258e-05	0.555322	-0.848603	1	3
2-dehydro-3-deoxy-D-gluconate 5-dehydrogenase	G5B5_03735	Poorly characterized	Function unknown	K00059,K00065	S	27 kDa	0.0006806	0.00071565	0.0007911	0.00054054	0.0005418	0.00068418	0	0.000729117	0.00058884	0.807607	-0.308274	3	3
2-dehydro-3-deoxygluconokinase	G5B5_03715	Metabolism	Carbohydrate transport and metabolism	K00874	G	40 kDa	0.00040558	0.00047533	0.00035029	0.00031209	0.00037985	0.00028216	0	0.0004104	0.0003247	0.791179	-0.337923	3	3
2-dehydro-3-deoxyphosphooctonate aldolase	G5B5_10745	Cellular processing and signaling	Cell wall/membrane/envelope biogenesis	K01627	M	29 kDa	0.00073164	0.00059856	0.00077843	0.00053501	0.00060142	0.00033859	0	0.000702877	0.000491673	0.699516	-0.515571	3	3
ATP-dependent zinc metalloprotease FtsH	G5B5_03300	Cellular processing and signaling	Post-translational modification, protein turnover, and chaperones	K03798	O	70 kDa	0.00020674	0.00016781	0.00013491		9.6005e-05	6.5202e-05	1	0.00016982	8.06035e-05	0.474641	-1.07509	3	2
hypothetical protein	G5B5_06675	Poorly characterized	Function unknown	K09967	S	26 kDa			0.00013598	6.9228e-05	7.3725e-05	8.7623e-05	0	0.00013598	7.68587e-05	0.56522	-0.823115	1	3
2-iminobutanoate/2-iminopropanoate deaminase	G5B5_02250	Information storage and processing	Translation, ribosomal structure and biogenesis	K04782	J	13 kDa	0.0012135	0.00079007	0.0012227	0.0010671	0.00078131	0.0011818	0	0.00107542	0.00101007	0.93923	-0.0904494	3	3
2-iminobutanoate/2-iminopropanoate deaminase	G5B5_09740	Information storage and processing	Translation, ribosomal structure and biogenesis	K09022	J	16 kDa	0.0033142	0.0043762	0.0024899	0.0034226	0.00324	0.0035757	0	0.00339343	0.00341277	1.0057	0.00819611	3	3
2-isopropylmalate synthase	G5B5_04760	Metabolism	Amino acid transport and metabolism	K01649	E	43 kDa	0.00020106	0.00017309	0.000164	0.00010437	0.00011115	0.00018495	0	0.000179383	0.00013349	0.744161	-0.426314	3	3
2-keto-4-pentenoate hydratase	G5B5_01985	Poorly characterized	Function unknown	K02554	S	27 kDa	0.0014172	0.0016451	0.0019455	0.0013242	0.001651	0.0013899	0	0.00166927	0.00145503	0.87166	-0.198162	3	3
putative protein	G5B5_08970	Metabolism	Secondary metabolites biosynthesis, transport, and catabolism	-	Q	50 kDa	5.628e-05	6.2294e-05		3.5058e-05			0	5.9287e-05	3.5058e-05	0.591327	-0.757972	2	1
2-oxoglutarate dehydrogenase E1 component	G5B5_04645	Metabolism	Energy production and conversion	K00164,K01616	C	93 kDa	0.0003516	0.00065243	0.00058203	0.00059908	0.00048364	0.0003669	0	0.000528687	0.000483207	0.913976	-0.129773	3	3
30S ribosomal protein S1	G5B5_07810	Information storage and processing	Translation, ribosomal structure and biogenesis	K02945,K03527	J	63 kDa	0.00041737	0.00046197	0.00034653	0.00040391	0.00032632	0.00045835	0	0.000408623	0.000396193	0.969581	-0.044567	3	3
30S ribosomal protein S10	G5B5_11150	Information storage and processing	Translation, ribosomal structure and biogenesis	K02946	J	12 kDa	0.0059367	0.0047201	0.0038877	0.0053127	0.0056579	0.0061311	0	0.00484817	0.00570057	1.17582	0.233666	3	3
30S ribosomal protein S11	G5B5_11535	Information storage and processing	Translation, ribosomal structure and biogenesis	K02948	J	15 kDa	0.0015678	0.0011106	0.0010742	0.00082035	0.0011857	0.0011125	0	0.00125087	0.00103952	0.831037	-0.267015	3	3
hypothetical protein	G5B5_08365	Poorly characterized	Function unknown	K09915	S	24 kDa			0.00030119	0.00019167	0.00020412	0.00014556	0	0.00030119	0.00018045	0.599123	-0.739075	1	3
30S ribosomal protein S12	G5B5_11130	Information storage and processing	Translation, ribosomal structure and biogenesis	K02950	J	14 kDa	0.0027653	0.0021425	0.00203	0.002067	0.0020637	0.0024528	0	0.0023126	0.0021945	0.948932	-0.0756235	3	3
30S ribosomal protein S13	G5B5_11530	Information storage and processing	Translation, ribosomal structure and biogenesis	K02952	J	17 kDa	0.0079462	0.005966	0.0038074	0.0052959	0.0057506	0.0065718	0	0.00590653	0.00587277	0.994283	-0.00827131	3	3
30S ribosomal protein S15	G5B5_00495	Information storage and processing	Translation, ribosomal structure and biogenesis	K02956	J	10 kDa	0.0032924	0.0013252	0.0014649	0.001678	0.0031769	0.0021239	0	0.0020275	0.00232627	1.14736	0.198315	3	3
30S ribosomal protein S16	G5B5_16530	Information storage and processing	Translation, ribosomal structure and biogenesis	K02959	J	10 kDa	0.0016334	0.001582	0.0017487	0.001717	0.0018286	0.0012074	0	0.0016547	0.00158433	0.957475	-0.0626938	3	3
30S ribosomal protein S17	G5B5_11200	Information storage and processing	Translation, ribosomal structure and biogenesis	K02961	J	13 kDa	0.0044301	0.0055276	0.0029566	0.0039136	0.002645	0.0022862	0	0.00430477	0.00294827	0.684884	-0.546068	3	3
30S ribosomal protein S18	G5B5_08150	Information storage and processing	Translation, ribosomal structure and biogenesis	K02963	J	13 kDa	0.0036234	0.0029308	0.002984	0.002409	0.0031895	0.0027195	0	0.0031794	0.00277267	0.872072	-0.19748	3	3
30S ribosomal protein S19	G5B5_11175	Information storage and processing	Translation, ribosomal structure and biogenesis	K02965	J	10 kDa	0.0029888	0.0022744	0.0015999	0.0018327	0.0018588	0.0015465	0	0.0022877	0.001746	0.763212	-0.389844	3	3
30S ribosomal protein S20	G5B5_03850	Information storage and processing	Translation, ribosomal structure and biogenesis	K02968	J	10 kDa	0.00038592	0.00053395	0.00070828	0.00036059	0.00048002	0.00057051	0	0.000542717	0.000470373	0.866701	-0.206393	3	3
30S ribosomal protein S21	G5B5_07715	Information storage and processing	Translation, ribosomal structure and biogenesis	K02970	J	8 kDa	0.0025664	0.0019436	0.0016527	0.0015145	0.0018817	0.0019169	0	0.00205423	0.00177103	0.862138	-0.214009	3	3
30S ribosomal protein S3	G5B5_11185	Information storage and processing	Translation, ribosomal structure and biogenesis	K02982	J	26 kDa	0.0037402	0.0026147	0.0028903	0.0026854	0.004427	0.0031662	0	0.00308173	0.0034262	1.11178	0.152867	3	3
30S ribosomal protein S4	G5B5_11540	Information storage and processing	Translation, ribosomal structure and biogenesis	K02986	J	24 kDa	0.006104	0.0054605	0.0046038	0.004258	0.0060739	0.0056861	0	0.00538943	0.00533933	0.990704	-0.013474	3	3
Chaperone protein DnaJ	G5B5_13940	Cellular processing and signaling	Post-translational modification, protein turnover, and chaperones	K03686	O	44 kDa	6.3468e-05			3.9535e-05			0	6.3468e-05	3.9535e-05	0.622912	-0.682899	1	1
30S ribosomal protein S4	G5B5_07345	Information storage and processing	Translation, ribosomal structure and biogenesis	K02986	J	24 kDa	0.00012724	9.3892e-05	0.00010379	0.00011889	0.00016882	0.00010032	0	0.000108307	0.000129343	1.19423	0.256075	3	3
Macrolide export protein MacA	G5B5_16765	Cellular processing and signaling	Defense mechanisms	K02005,K13888	V	42 kDa		7.3066e-05		4.112e-05	4.3792e-05	5.2047e-05	0	7.3066e-05	4.5653e-05	0.624819	-0.678491	1	3
30S ribosomal protein S5	G5B5_11240	Information storage and processing	Translation, ribosomal structure and biogenesis	K02988	J	18 kDa	0.0032924	0.0028344	0.0026856	0.0030763	0.0035362	0.0045736	0	0.00293747	0.0037287	1.26936	0.3441	3	3
30S ribosomal protein S6	G5B5_08155	Information storage and processing	Translation, ribosomal structure and biogenesis	K02990	J	18 kDa	0.0011452	0.0016901	0.00046706	0.001121	0.00032558	0.0014833	0	0.00110079	0.000976627	0.887208	-0.172656	3	3
Phenylalanine-4-hydroxylase	G5B5_16580	Metabolism	Amino acid transport and metabolism	K00500	E	28 kDa		0.00015674		9.9236e-05			0	0.00015674	9.9236e-05	0.633125	-0.659438	1	1
30S ribosomal protein S7	G5B5_11135	Information storage and processing	Translation, ribosomal structure and biogenesis	K02992	J	17 kDa	0.0046712	0.0051704	0.0038562	0.0035759	0.0046482	0.0043264	0	0.00456593	0.0041835	0.916242	-0.126199	3	3
30S ribosomal protein S8	G5B5_11225	Information storage and processing	Translation, ribosomal structure and biogenesis	K02994	J	15 kDa	0.0072499	0.0064049	0.0065105	0.0043503	0.0077437	0.0057423	0	0.00672177	0.00594543	0.884505	-0.177058	3	3
(R)-stereoselective amidase	G5B5_02930	Metabolism	Amino acid transport and metabolism	K12251	E	35 kDa	0.00081345	0.0011177	0.00099529	0.00047177	0.00064198	0.00036491	1	0.00097548	0.000492887	0.505276	-0.984856	3	3
putative D-xylose utilization operon transcriptional repressor	G5B5_07395	Information storage and processing	Transcription	-	K	26 kDa	0.00015539	0.000258	0.0001426	7.2597e-05	7.7314e-05	0.00013783	1	0.00018533	9.59137e-05	0.517529	-0.950288	3	3
hypothetical protein	G5B5_06845	unclassified	unclassified	-	-	21 kDa	0.00014715	0.00016287	0.00012003	9.1659e-05			0	0.00014335	9.1659e-05	0.639407	-0.645193	3	1
3-dehydroquinate synthase	G5B5_04415	Metabolism	Amino acid transport and metabolism	K01735,K13829	E	40 kDa	0.00014085	0.00018188	0.00020106	0.00017548	0.00014016	0.00016658	0	0.000174597	0.00016074	0.920636	-0.119297	3	3
Glutamine--fructose-6-phosphate aminotransferase [isomerizing]	G5B5_12740	Cellular processing and signaling	Cell wall/membrane/envelope biogenesis	K00820	M	41 kDa	0.00074129	0.0005641	0.00042516	0.00025974	0.00034577	0.00030136	1	0.00057685	0.00030229	0.524036	-0.932263	3	3
3-phenylpropionate-dihydrodiol/cinnamic acid-dihydrodiol dehydrogenase	G5B5_06120	Poorly characterized	Function unknown	-	S	31 kDa	9.1139e-05	0.00010088	0.00022302	5.6771e-05	9.069e-05	7.1857e-05	1	0.000138346	7.3106e-05	0.528427	-0.920223	3	3
3-isopropylmalate dehydratase large subunit	G5B5_04775	Metabolism	Amino acid transport and metabolism	K01703	E	51 kDa	0.0013151	0.00092258	0.00077055	0.00079612	0.0010137	0.00096386	0	0.00100274	0.00092456	0.922031	-0.117114	3	3
3-methyl-2-oxobutanoate hydroxymethyltransferase	G5B5_00460	Metabolism	Coenzyme transport and metabolism	K00606	H	30 kDa	0.00012152	0.00023538	0.00011151	8.5157e-05	9.069e-05	7.1857e-05	1	0.000156137	8.2568e-05	0.528819	-0.919155	3	3
Ferredoxin--NADP reductase	G5B5_02750	Metabolism	Energy production and conversion	K00384	C	61 kDa	0.00022067	0.00038383	0.00042429	0.00017674	0.00018822	0.00018642	1	0.00034293	0.000183793	0.53595	-0.89983	3	3
N-acetylmuramic acid/N-acetylglucosamine kinase	G5B5_12735	Information storage and processing	Transcription	-	K	32 kDa	0.00023104	0.00015983	0.00031803	0.00013493	0.00011495	0.00013662	1	0.0002363	0.000128833	0.545211	-0.875114	3	3
3-oxoacyl-[acyl-carrier-protein] reductase	G5B5_08255	Poorly characterized	Function unknown	K00059	S	28 kDa	9.828e-05	0.00021756	0.00016033	0.00021427	0.00019559	0.00015498	0	0.000158723	0.00018828	1.18622	0.246366	3	3
hypothetical protein	G5B5_02110	unclassified	unclassified	-	-	30 kDa	8.8386e-05	9.783e-05	0.00014419	5.5057e-05	5.8634e-05	6.9687e-05	1	0.000110135	6.1126e-05	0.555008	-0.849419	3	3
3-oxoacyl-[acyl-carrier-protein] reductase FabG	G5B5_14750	Metabolism	Lipid transport and metabolism	K00059,K11610	I	25 kDa	0.00021241	0.00027429	0.00030321	0.00026463	0.00035228	0.00037682	0	0.000263303	0.000331243	1.25803	0.331166	3	3
Putative aminoacrylate peracid reductase RutC	G5B5_08120	Information storage and processing	Translation, ribosomal structure and biogenesis	-	J	18 kDa	0.00026605	0.00029448	0.00026042	0.00019887	0.0001059		1	0.00027365	0.000152385	0.556861	-0.844611	3	2
3-oxoacyl-[acyl-carrier-protein] reductase FabG	G5B5_10525	unclassified	unclassified	-	I, Q	31 kDa	0.00033534	0.00040491	0.0005595	0.00042726	0.00030335	0.00028843	0	0.00043325	0.00033968	0.784028	-0.351023	3	3
hypothetical protein	G5B5_02460	unclassified	unclassified	-	-	33 kDa	0.00014781	0.00013088	0.00025319	0.00011048	0.00011766	6.9922e-05	1	0.000177293	9.9354e-05	0.560393	-0.835488	3	3
Ribosome-binding ATPase YchF	G5B5_09120	Information storage and processing	Translation, ribosomal structure and biogenesis	K06942	J	40 kDa	0.00012027	0.00013312	0.00014715	6.7426e-05	7.1806e-05	8.5343e-05	1	0.000133513	7.48583e-05	0.560681	-0.834749	3	3
3-phenylpropionate-dihydrodiol/cinnamic acid-dihydrodiol dehydrogenase	G5B5_07215	Cellular processing and signaling	Cell wall/membrane/envelope biogenesis	K14189	M	28 kDa	0.0021431	0.0028312	0.0039332	0.0026807	0.0024077	0.0025754	0	0.00296917	0.0025546	0.860376	-0.216961	3	3
Carbonic anhydrase 1	G5B5_11445	Metabolism	Inorganic ion transport and metabolism	K01673	P	23 kDa	0.00045771	0.0004145	0.00050911	0.00023327	0.00024843	0.00029526	1	0.00046044	0.000258987	0.562476	-0.830135	3	3
3-phenylpropionate-dihydrodiol/cinnamic acid-dihydrodiol dehydrogenase	G5B5_13835	Poorly characterized	Function unknown	K00001,K01629	S	79 kDa	0.00072965	0.00060902	0.00051224	0.00054764	0.00064274	0.00060829	0	0.00061697	0.000599557	0.971776	-0.0413042	3	3
3-phosphoshikimate 1-carboxyvinyltransferase 1	G5B5_01025	Metabolism	Amino acid transport and metabolism	K00800	E	46 kDa	0.00090824	0.00051382	0.00071615	0.00067891	0.00052218	0.00071609	0	0.000712737	0.00063906	0.896628	-0.157418	3	3
CTP synthase	G5B5_06855	Metabolism	Nucleotide transport and metabolism	K01937	F	61 kDa	3.216e-05	7.1193e-05	3.9349e-05		3.2002e-05		0	4.75673e-05	3.2002e-05	0.672773	-0.571809	3	1
4-alpha-glucanotransferase	G5B5_03550	Metabolism	Carbohydrate transport and metabolism	K00705	G	58 kDa	0.00065162	0.00074022	0.00071336	0.00070499	0.00068254	0.00095316	0	0.000701733	0.00078023	1.11186	0.152977	3	3
hypothetical protein	G5B5_00615	unclassified	unclassified	-	-	23 kDa	0.00092418	0.00093768	0.0011779	0.00050372	0.00053645	0.00068312	1	0.00101325	0.00057443	0.566916	-0.818792	3	3
Cysteine synthase B	G5B5_05430	Metabolism	Amino acid transport and metabolism	K01738,K01883,K12339	E	35 kDa	0.00055871	0.00058896	0.0006185	0.00039774	0.00039711	0.00025172	1	0.000588723	0.000348857	0.592565	-0.754955	3	3
4-hydroxy-3-methylbut-2-enyl diphosphate reductase 2	G5B5_00745	Metabolism	Lipid transport and metabolism	K02945,K03527	I	36 kDa	0.0012431	0.001118	0.0011091	0.00096796	0.00095354	0.0011945	0	0.00115673	0.00103867	0.897931	-0.155324	3	3
4-hydroxy-tetrahydrodipicolinate reductase	G5B5_03965	Metabolism	Amino acid transport and metabolism	K00215,K01990	E	25 kDa	0.00030671	0.00038192	0.00023455	0.00035823	0.0003052	0.00040808	0	0.000307727	0.00035717	1.16067	0.214961	3	3
4-hydroxy-tetrahydrodipicolinate synthase	G5B5_03995	Metabolism	Amino acid transport and metabolism	K01714	E	31 kDa	0.0010346	0.00075256	0.0011213	0.00055242	0.00079422	0.00083906	0	0.000969487	0.000728567	0.751497	-0.41216	3	3
4-hydroxy-tetrahydrodipicolinate synthase	G5B5_00650	unclassified	unclassified	-	E, M	37 kDa	0.00030538	0.00039435	0.00052933	0.00049934	0.00055711	0.00030097	0	0.000409687	0.000452473	1.10444	0.143312	3	3
50S ribosomal protein L1	G5B5_05235	Information storage and processing	Translation, ribosomal structure and biogenesis	K02863	J	25 kDa	0.0059272	0.0070526	0.0081587	0.0064036	0.006709	0.0072727	0	0.00704617	0.0067951	0.964368	-0.0523438	3	3
50S ribosomal protein L10	G5B5_05230	Information storage and processing	Translation, ribosomal structure and biogenesis	K02864	J	24 kDa	0.0018307	0.00153	0.0016913	0.0016407	0.0015242	0.0019441	0	0.001684	0.001703	1.01128	0.0161863	3	3
50S ribosomal protein L11	G5B5_05290	Information storage and processing	Translation, ribosomal structure and biogenesis	K02867	J	15 kDa	0.0029669	0.0037531	0.0026671	0.0035077	0.0033138	0.002936	0	0.00312903	0.0032525	1.03946	0.055832	3	3
50S ribosomal protein L13	G5B5_06940	Information storage and processing	Translation, ribosomal structure and biogenesis	K02871	J	16 kDa	0.0034407	0.0033487	0.0023952	0.0027714	0.0032467	0.0034377	0	0.00306153	0.00315193	1.02953	0.0419826	3	3
50S ribosomal protein L14	G5B5_11205	Information storage and processing	Translation, ribosomal structure and biogenesis	K02874	J	13 kDa	0.0053535	0.0041083	0.0040174	0.0044686	0.0049009	0.0057404	0	0.00449307	0.00503663	1.12098	0.164759	3	3
50S ribosomal protein L15	G5B5_11250	Information storage and processing	Translation, ribosomal structure and biogenesis	K02876	J	18 kDa	0.0021949	0.0037599	0.0015346	0.0029786	0.0025481	0.0022868	0	0.00249647	0.0026045	1.04327	0.0611188	3	3
50S ribosomal protein L16	G5B5_11190	Information storage and processing	Translation, ribosomal structure and biogenesis	K02878	J	16 kDa	0.0034143	0.0034417	0.0026856	0.0026206	0.0029122	0.0031727	0	0.00318053	0.00290183	0.912373	-0.132304	3	3
Chorismate dehydratase	G5B5_04850	Poorly characterized	Function unknown	K11782	S	32 kDa	0.00012194	0.00010123	0.0001492	8.5453e-05			0	0.000124123	8.5453e-05	0.688452	-0.538571	3	1
50S ribosomal protein L17	G5B5_11550	Information storage and processing	Translation, ribosomal structure and biogenesis	K02879	J	18 kDa	0.0034894	0.0036753	0.0033742	0.0036285	0.0039762	0.003328	0	0.00351297	0.00364423	1.03737	0.0529254	3	3
50S ribosomal protein L18	G5B5_11235	Information storage and processing	Translation, ribosomal structure and biogenesis	K02881	J	13 kDa	0.00021768	0.00056219	0.00026634	0.00047458	0.001083	0.00025744	0	0.000348737	0.000605007	1.73485	0.794813	3	3
50S ribosomal protein L19	G5B5_16505	Information storage and processing	Translation, ribosomal structure and biogenesis	K02884	J	14 kDa	0.0050595	0.0050236	0.0040966	0.004936	0.0062192	0.0052797	0	0.00472657	0.0054783	1.15904	0.212936	3	3
50S ribosomal protein L2	G5B5_11170	Information storage and processing	Translation, ribosomal structure and biogenesis	K02886	J	30 kDa	0.0028311	0.0025351	0.0028023	0.00214	0.0026906	0.0027087	0	0.00272283	0.0025131	0.922972	-0.115641	3	3
50S ribosomal protein L20	G5B5_07225	Information storage and processing	Translation, ribosomal structure and biogenesis	K02887	J	14 kDa	0.0029727	0.0027547	0.0027067	0.002713	0.0028204	0.0037609	0	0.00281137	0.0030981	1.10199	0.140112	3	3
50S ribosomal protein L21	G5B5_07675	Information storage and processing	Translation, ribosomal structure and biogenesis	K02888	J	12 kDa	0.0036444	0.0040338	0.003243	0.0042565	0.003544	0.0042121	0	0.0036404	0.0040042	1.09993	0.137417	3	3
50S ribosomal protein L23	G5B5_11165	Information storage and processing	Translation, ribosomal structure and biogenesis	K02892	J	11 kDa	0.0076935	0.003807	0.0039868	0.0068503	0.0069351	0.0052452	0	0.00516243	0.00634353	1.22879	0.297235	3	3
50S ribosomal protein L24	G5B5_11210	Information storage and processing	Translation, ribosomal structure and biogenesis	K02895	J	12 kDa	0.0042302	0.0033571	0.0035157	0.0037289	0.0037328	0.0036814	0	0.003701	0.00371437	1.00361	0.0052011	3	3
Gluconate 5-dehydrogenase	G5B5_13900	unclassified	unclassified	K00046	I, Q	27 kDa	0.0020758	0.002034	0.0030395	0.001558	0.0015577	0.0011269	1	0.0023831	0.0014142	0.593429	-0.752853	3	3
50S ribosomal protein L27	G5B5_07680	Information storage and processing	Translation, ribosomal structure and biogenesis	K02899	J	9 kDa	0.0014797	0.00087351	0.0009656	0.0012904	0.0018651	0.0015167	0	0.00110627	0.0015574	1.40779	0.493436	3	3
50S ribosomal protein L29	G5B5_11195	Information storage and processing	Translation, ribosomal structure and biogenesis	K02904	J	8 kDa	0.00038734	0.0010004	0.00078988	0.00072384	0.00089934	0.00045809	0	0.000725873	0.000693757	0.955754	-0.0652881	3	3
50S ribosomal protein L3	G5B5_11155	Information storage and processing	Translation, ribosomal structure and biogenesis	K02906	J	26 kDa	0.0036342	0.0042217	0.0046227	0.0036647	0.0042966	0.0038299	0	0.00415953	0.0039304	0.944914	-0.0817455	3	3
50S ribosomal protein L30	G5B5_11245	Information storage and processing	Translation, ribosomal structure and biogenesis	K02907	J	7 kDa	0.0010075	0.00047793	0.0012327	0.00094138	0.001289	0.0013618	0	0.000906043	0.00119739	1.32156	0.402245	3	3
50S ribosomal protein L34	G5B5_09080	Information storage and processing	Translation, ribosomal structure and biogenesis	K02914	J	6 kDa	0.0051645	0.004192	0.0035808	0.0053081	0.0058243	0.0038683	0	0.00431243	0.00500023	1.15949	0.213493	3	3
50S ribosomal protein L4	G5B5_11160	Information storage and processing	Translation, ribosomal structure and biogenesis	K02926	J	25 kDa	0.0088983	0.009499	0.011081	0.0087208	0.01342	0.01043	0	0.0098261	0.0108569	1.10491	0.143926	3	3
50S ribosomal protein L5	G5B5_11215	Information storage and processing	Translation, ribosomal structure and biogenesis	K02931	J	20 kDa	0.004824	0.003524	0.0034824	0.0041017	0.0041762	0.0049064	0	0.00394347	0.00439477	1.11444	0.156322	3	3
50S ribosomal protein L6	G5B5_11230	Information storage and processing	Translation, ribosomal structure and biogenesis	K02933	J	19 kDa	0.0025505	0.002443	0.0026406	0.0019707	0.0031236	0.0034805	0	0.0025447	0.00285827	1.12322	0.167645	3	3
50S ribosomal protein L7/L12	G5B5_05225	Information storage and processing	Translation, ribosomal structure and biogenesis	K02935	J	13 kDa	0.0072928	0.0028213	0.0037252	0.0087327	0.0057773	0.0059453	0	0.0046131	0.00681843	1.47806	0.563704	3	3
50S ribosomal protein L9	G5B5_08145	Information storage and processing	Translation, ribosomal structure and biogenesis	K02939	J	20 kDa	0.002877	0.002251	0.0023063	0.0025028	0.0026654	0.0030505	0	0.0024781	0.00273957	1.10551	0.144713	3	3
5-hydroxyisourate hydrolase	G5B5_05485	Metabolism	Nucleotide transport and metabolism	K07127	F	12 kDa	0.00079096	0.0001751	0.00029033	0.00036953	0.00031483	0.00056126	0	0.000418797	0.000415207	0.991428	-0.0124204	3	3
6,7-dimethyl-8-ribityllumazine synthase	G5B5_11100	Metabolism	Coenzyme transport and metabolism	K00794	H	30 kDa	0.0014221	0.0015398	0.0015887	0.0012132	0.0015381	0.0013162	0	0.00151687	0.00135583	0.893838	-0.161914	3	3
60 kDa chaperonin 1	G5B5_13545	Cellular processing and signaling	Post-translational modification, protein turnover, and chaperones	K04077	O	59 kDa	0.036019	0.034379	0.04239	0.043083	0.039565	0.035408	0	0.037596	0.039352	1.04671	0.0658578	3	3
6-carboxy-5,6,7,8-tetrahydropterin synthase	G5B5_12045	Metabolism	Coenzyme transport and metabolism	K01737	H	15 kDa	0.00027653	0.00038259	0.00025376	0.00032297	0.00027516	0.00024528	0	0.000304293	0.000281137	0.9239	-0.114191	3	3
6'''-hydroxyparomomycin C oxidase	G5B5_11270	Metabolism	Amino acid transport and metabolism	-	E	62 kDa	0.00016943	0.00022163	0.000245	0.00020149	0.00019925	0.0002186	0	0.00021202	0.000206447	0.973713	-0.0384312	3	3
6-phosphogluconate dehydrogenase, decarboxylating	G5B5_05760	Metabolism	Carbohydrate transport and metabolism	K00033	G	53 kDa	5.4084e-05	7.9818e-05	4.4116e-05	0.00010107	5.3818e-05	8.5284e-05	0	5.93393e-05	8.00573e-05	1.34914	0.432045	3	3
6-phosphogluconate dehydrogenase, NAD(+)-dependent, decarboxylating	G5B5_10530	Metabolism	Carbohydrate transport and metabolism	K00033	G	33 kDa	0.0032377	0.0028411	0.0034975	0.0030797	0.0029315	0.0022078	0	0.0031921	0.00273967	0.858265	-0.220505	3	3
6-phosphogluconate dehydrogenase, NAD(+)-dependent, decarboxylating	G5B5_15600	Metabolism	Carbohydrate transport and metabolism	K00033	G	37 kDa	0.00028405	0.00028582	0.00041074	0.0004343	0.00038543	0.00045809	0	0.00032687	0.00042594	1.30309	0.381933	3	3
6-phosphogluconolactonase	G5B5_10540	Metabolism	Carbohydrate transport and metabolism	K01057	G	29 kDa	0.0013931	0.0011116	0.0019027	0.0015741	0.0011283	0.00099619	0	0.00146913	0.00123286	0.839177	-0.252952	3	3
6-phosphogluconolactonase	G5B5_10750	Poorly characterized	Function unknown	-	S	44 kDa	0.00035036	0.00036499	0.0004539	0.00036588	0.00036915	0.00038999	0	0.00038975	0.000375007	0.962172	-0.0556328	3	3
6-phosphogluconolactonase	G5B5_10755	Poorly characterized	Function unknown	-	S	43 kDa	0.00025205	0.00025573	0.00038549	0.00027476	0.00027171	0.00032293	0	0.000297757	0.0002898	0.973278	-0.0390762	3	3
8-amino-7-oxononanoate synthase/2-amino-3-ketobutyrate coenzyme A ligase	G5B5_12440	Metabolism	Amino acid transport and metabolism	K00639,K00652	E	45 kDa	0.00017007	0.00011765	0.00013005	0.00011918	0.00010577	0.00015085	0	0.000139257	0.000125267	0.899538	-0.152744	3	3
ABC transporter ATP-binding protein NatA	G5B5_14875	Metabolism	Inorganic ion transport and metabolism	K01990,K02193	P	26 kDa				0.00010004	7.1028e-05	8.4418e-05	0		8.5162e-05	on Mn		0	3
ABC transporter ATP-binding protein YxdL	G5B5_10780	Cellular processing and signaling	Defense mechanisms	K02003	V	26 kDa	0.00014572	0.00016129	0.00026744	0.00027231	0.00029001	0.00017234	0	0.000191483	0.000244887	1.27889	0.354895	3	3
Acetate kinase	G5B5_00990	Metabolism	Energy production and conversion	K00925	C	40 kDa	0.0010536	0.00062194	0.00083074	0.00070003	0.00072221	0.00069222	0	0.000835427	0.00070482	0.843665	-0.245258	3	3
Phospho-2-dehydro-3-deoxyheptonate aldolase	G5B5_07595	Metabolism	Amino acid transport and metabolism	K03856	E	38 kDa	0.0026061	0.0019884	0.0024766	0.0014421	0.001561	0.0012269	1	0.00235703	0.00141	0.59821	-0.741277	3	3
Acetolactate synthase large subunit	G5B5_04795	Metabolism	Amino acid transport and metabolism	K01652	E	65 kDa	7.1613e-05	0.00011097	0.00010514	0.00013383	0.00014252	8.4693e-05	0	9.59077e-05	0.000120348	1.25483	0.32749	3	3
Acetophenone carboxylase gamma subunit	G5B5_09680	Metabolism	Amino acid transport and metabolism	K01469,K01473	E	69 kDa	0.00020137	0.00020803	0.00016426	0.00016307	0.00020038	0.00012701	0	0.00019122	0.000163487	0.854966	-0.22606	3	3
Acetyl-coenzyme A carboxylase carboxyl transferase subunit beta	G5B5_09045	Metabolism	Lipid transport and metabolism	K01695,K01962,K01963	I	31 kDa				8.6352e-05	6.1308e-05		0		7.383e-05			0	2
Acetyl-coenzyme A synthetase	G5B5_04720	Metabolism	Lipid transport and metabolism	K01895	I	74 kDa	0.00011936	0.00013212	0.0001785	0.00019827	0.00011877	7.8424e-05	0	0.000143327	0.000131821	0.919726	-0.120723	3	3
Nitrogen regulatory protein P-II	G5B5_15965	Metabolism	Amino acid transport and metabolism	K04751,K04752	E	12 kDa	0.00023517				0.00015601	0.00018542	0	0.00023517	0.000170715	0.725922	-0.462114	1	2
hypothetical protein	G5B5_05435	Poorly characterized	Function unknown	-	S	18 kDa		0.00034098		0.00019189		0.00030361	0	0.00034098	0.00024775	0.726582	-0.460802	1	2
putative nicotinate-nucleotide pyrophosphorylase [carboxylating]	G5B5_06545	Metabolism	Coenzyme transport and metabolism	K00767	H	30 kDa	0.00057922	0.00060736	0.00067139	0.00034181	0.00030335	0.00046869	1	0.000619323	0.000371283	0.599498	-0.738172	3	3
Acetylornithine deacetylase	G5B5_01175	Metabolism	Amino acid transport and metabolism	K01438	E	32 kDa	0.00041386	0.00045808	0.0004702	0.0003867	0.00047065	0.00027969	0	0.00044738	0.000379013	0.847184	-0.239252	3	3
Beta-hexosaminidase	G5B5_09865	Metabolism	Carbohydrate transport and metabolism	K05349	G	96 kDa	1.9532e-05	4.3238e-05		1.825e-05	1.9436e-05		1	3.1385e-05	1.8843e-05	0.600382	-0.736047	2	2
Acid phosphatase	G5B5_02645	Metabolism	Carbohydrate transport and metabolism	K15634	G	23 kDa	0.00067536	0.00084097	0.00092962	0.00063104	0.00063003	0.00089856	0	0.000815317	0.000719877	0.882941	-0.179611	3	3
Aconitate hydratase A	G5B5_07635	Metabolism	Energy production and conversion	K01681	C	101 kDa	0.0024497	0.0034773	0.0033062	0.0028743	0.0029028	0.0015039	0	0.00307773	0.002427	0.788567	-0.342694	3	3
Acyl carrier protein	G5B5_07825	unclassified	unclassified	K02078	I, Q	9 kDa	0.0014267	0.0010933	0.00080567	0.00092289	0.00087365	0.00051917	0	0.00110856	0.000771903	0.696314	-0.52219	3	3
Acyl-CoA thioester hydrolase YbgC	G5B5_04920	Poorly characterized	Function unknown	K07107	S	18 kDa	0.00022953	0.00025406	0.00021063	0.00021447	0.0001713	0.00027146	0	0.000231407	0.000219077	0.946717	-0.0789946	3	3
Adaptive-response sensory-kinase SasA	G5B5_12135	Cellular processing and signaling	Signal transduction mechanisms	-	T	61 kDa		5.2529e-05	3.8711e-05	4.4343e-05		5.6126e-05	0	4.562e-05	5.02345e-05	1.10115	0.139012	2	2
hypothetical protein	G5B5_12210	Poorly characterized	Function unknown	K07040	S	20 kDa	0.00052774	0.00042482	0.00052831	0.00031379	0.0002387	0.00034044	1	0.000493623	0.000297643	0.602977	-0.729826	3	3
Adenine phosphoribosyltransferase	G5B5_11685	Metabolism	Nucleotide transport and metabolism	K00759	F	20 kDa	0.00034143	0.00053988	0.0002984	0.00022787	0.00024268	0.00063454	0	0.000393237	0.000368363	0.936747	-0.0942684	3	3
Queuine tRNA-ribosyltransferase	G5B5_08645	Information storage and processing	Translation, ribosomal structure and biogenesis	K00773	J	44 kDa	0.00036019	0.00054818	0.0004958	0.00027345	0.00031362	0.00026624	1	0.000468057	0.000284437	0.607697	-0.718576	3	3
Adenylate kinase	G5B5_11260	Metabolism	Nucleotide transport and metabolism	K00939	F	26 kDa	7.409e-05		0.00013598	0.00010384	7.3725e-05	8.7623e-05	0	0.000105035	8.8396e-05	0.841586	-0.248817	2	3
Adenylosuccinate lyase	G5B5_03025	Metabolism	Nucleotide transport and metabolism	K01756	F	48 kDa	0.00036582	0.00049489	0.00047246	0.00053171	0.00048536	0.00050475	0	0.00044439	0.000507273	1.1415	0.190937	3	3
Adenylosuccinate synthetase	G5B5_12285	Metabolism	Nucleotide transport and metabolism	K01939	F	48 kDa	0.0015482	0.0013232	0.0016545	0.0012269	0.0015796	0.0013211	0	0.00150863	0.00137587	0.911995	-0.132902	3	3
ADP-L-glycero-D-manno-heptose-6-epimerase	G5B5_02580	Cellular processing and signaling	Cell wall/membrane/envelope biogenesis	K01784,K03274	M	37 kDa	0.00043357	0.00080982	0.00062995	0.00040511	0.00059322	0.00032047	0	0.000624447	0.0004396	0.703983	-0.506387	3	3
ADP-ribose pyrophosphatase	G5B5_06070	Information storage and processing	Replication, recombination and repair	K01515	L	21 kDa	0.00023988	0.00026551	0.00035221	0.00035862	0.00019096	0.00034044	0	0.000285867	0.000296673	1.0378	0.0535329	3	3
Aerobic cobaltochelatase subunit CobN	G5B5_00320	Metabolism	Coenzyme transport and metabolism	K02230	H	161 kDa		4.6785e-05	3.6941e-05	5.642e-05	4.206e-05	2.1424e-05	0	4.1863e-05	3.9968e-05	0.954733	-0.0668303	2	3
1-deoxy-D-xylulose 5-phosphate reductoisomerase	G5B5_04975	Metabolism	Lipid transport and metabolism	K00099	I	44 kDa	0.00029834	0.00023587	0.00026074	0.00015929	0.00012723	0.00020162	1	0.000264983	0.000162713	0.614051	-0.703569	3	3
Alanine--tRNA ligase	G5B5_05800	Information storage and processing	Translation, ribosomal structure and biogenesis	K01872	J	108 kDa	0.00027163	0.00032005	0.00039667	0.00033567	0.00024413	0.00019689	0	0.00032945	0.000258897	0.785845	-0.347683	3	3
Alcohol dehydrogenase	G5B5_15545	Metabolism	Energy production and conversion	K13953	C	36 kDa	0.001123	0.001243	0.0015614	0.0013116	0.0013714	0.0012074	0	0.00130913	0.0012968	0.990579	-0.013656	3	3
Alcohol dehydrogenase	G5B5_04830	Metabolism	Energy production and conversion	-	C	36 kDa	0.00018129	0.00020066	0.00022182	0.00016939	0.00028348	0.00027566	0	0.000201257	0.000242843	1.20663	0.270989	3	3
Aldehyde reductase YahK	G5B5_08705	Metabolism	Energy production and conversion	K13979	C	37 kDa	0.00062533	0.0010798	0.00082633	0.00077127	0.00084627	0.0010354	0	0.00084382	0.000884313	1.04799	0.0676224	3	3
Aldo-keto reductase IolS	G5B5_10215	Metabolism	Energy production and conversion	-	C	39 kDa	0.0017908	0.0021748	0.0027693	0.0018591	0.0022522	0.0018237	0	0.00224497	0.00197833	0.881231	-0.182408	3	3
hypothetical protein	G5B5_15340	Poorly characterized	Function unknown	-	S	72 kDa	2.6053e-05	4.3254e-05			2.5924e-05		0	3.46535e-05	2.5924e-05	0.748092	-0.418713	2	1
Aldo-keto reductase IolS	G5B5_09505	Metabolism	Energy production and conversion	-	C	39 kDa	0.00027515	0.00035992	0.00033665	0.00028046	0.00037335	0.00026624	0	0.000323907	0.000306683	0.946826	-0.0788284	3	3
hypothetical protein	G5B5_15980	unclassified	unclassified	-	-	58 kDa	0.00023601	0.00036572	0.00023102	0.00019112	0.00017222	0.00014887	1	0.000277583	0.000170737	0.615083	-0.701148	3	3
hypothetical protein	G5B5_01695	unclassified	unclassified	-	-	105 kDa		6.8367e-05		4.1223e-05	6.1462e-05		0	6.8367e-05	5.13425e-05	0.750984	-0.413147	1	2
Aldose 1-epimerase	G5B5_14785	Metabolism	Carbohydrate transport and metabolism	K01785	G	40 kDa	0.0002335	0.00025845	0.0002857	0.00021818	0.00027882	0.00030377	0	0.000259217	0.000266923	1.02973	0.0422669	3	3
Alginate biosynthesis protein AlgA	G5B5_11035	Cellular processing and signaling	Cell wall/membrane/envelope biogenesis	K00971,K01809,K16011	M	41 kDa	9.365e-05	7.7743e-05		4.3752e-05	4.6594e-05	8.3067e-05	0	8.56965e-05	5.78043e-05	0.674524	-0.568059	2	3
Alginate lyase	G5B5_06045	Metabolism	Carbohydrate transport and metabolism	K01729	G	44 kDa		4.7989e-05	7.9573e-05	6.0766e-05	6.4714e-05	7.6914e-05	0	6.3781e-05	6.74647e-05	1.05775	0.0810054	2	3
Alkanal monooxygenase alpha chain	G5B5_09115	Metabolism	Energy production and conversion	-	C	38 kDa	0.00030362	0.00050409	0.00068107	0.00044918	0.00052872	0.00041893	0	0.00049626	0.00046561	0.938238	-0.0919741	3	3
Hypoxanthine phosphoribosyltransferase	G5B5_01030	Metabolism	Nucleotide transport and metabolism	K00760	F	22 kDa	0.0064716	0.0066121	0.0067555	0.0042709	0.0036927	0.0042818	1	0.00661307	0.0040818	0.617233	-0.696114	3	3
Allantoate amidohydrolase	G5B5_02025	Metabolism	Amino acid transport and metabolism	K02083,K06016	E	44 kDa	0.00021362	0.0002128	0.00031364	0.00015968	0.00023382	0.00020211	0	0.000246687	0.000198537	0.804813	-0.313274	3	3
Allantoinase	G5B5_05475	Metabolism	Nucleotide transport and metabolism	K01464,K01465,K01466	F	51 kDa	0.00016635	0.00022504	0.00022615	0.0001727	0.00022071	0.00019674	0	0.000205847	0.000196717	0.955647	-0.0654509	3	3
hypothetical protein	G5B5_07985	Poorly characterized	Function unknown	-	S	51 kDa	0.00013749			9.1761e-05		0.00011615	0	0.00013749	0.000103956	0.756095	-0.403361	1	2
Allophanate hydrolase	G5B5_06690	Metabolism	Carbohydrate transport and metabolism	K01457,K02433	G	64 kDa	0.00020554	0.00019501	0.00023353	0.00020577	0.00018992	8.6817e-05	0	0.00021136	0.000160836	0.760956	-0.394115	3	3
hypothetical protein	G5B5_12065	Poorly characterized	Function unknown	-	S	69 kDa	0.0018285	0.0014986	0.0015541	0.0010825	0.0010556	0.00087491	1	0.00162707	0.00100434	0.617268	-0.69603	3	3
hypothetical protein	G5B5_04745	unclassified	unclassified	-	-	24 kDa	0.00069421	0.00058759	0.00059957	0.00049602	0.00024381	0.00043465	1	0.000627123	0.000391493	0.624268	-0.679761	3	3
Alpha-amylase	G5B5_09390	Metabolism	Carbohydrate transport and metabolism	K01176	G	50 kDa	0.00065254	0.00072227	0.00072583	0.00064667	0.00086577	0.00067819	0	0.000700213	0.00073021	1.04284	0.0605169	3	3
Alpha-galactosidase AgaA	G5B5_09650	Metabolism	Carbohydrate transport and metabolism	K07407	G	83 kDa	0.00026137	0.00019725	0.00018897	0.00016651	0.00026008	8.4303e-05	0	0.000215863	0.000170298	0.788914	-0.34206	3	3
Alpha-pyrone synthesis polyketide synthase-like Pks18	G5B5_09450	Metabolism	Secondary metabolites biosynthesis, transport, and catabolism	K16167,K16233	Q	42 kDa	0.00021184	0.00013027	0.0002592	0.00026392	0.00025764	0.00019486	0	0.000200437	0.000238807	1.19143	0.252697	3	3
Amino-acid acetyltransferase	G5B5_13910	Information storage and processing	Transcription	-	K	19 kDa	0.00035119	0.00038871	0.00049108	0.00065628	0.0004493	0.000356	0	0.000410327	0.000487193	1.18733	0.247721	3	3
Aminodeoxychorismate/anthranilate synthase component 2	G5B5_11660	Metabolism	Amino acid transport and metabolism	K01658	E	22 kDa	0.0002206		0.00043185	0.00041223		0.00041742	0	0.000326225	0.000414825	1.27159	0.346635	2	2
Lipoprotein-releasing system ATP-binding protein LolD	G5B5_14985	Metabolism	Inorganic ion transport and metabolism	K02003,K09810	P	25 kDa			9.1815e-05	7.0115e-05			0	9.1815e-05	7.0115e-05	0.763655	-0.389007	1	1
Epoxide hydrolase A	G5B5_14480	Poorly characterized	Function unknown	K01253,K08253	S	35 kDa			6.8205e-05	5.2086e-05			0	6.8205e-05	5.2086e-05	0.763668	-0.388982	1	1
Aminodeoxyfutalosine deaminase	G5B5_08495	Metabolism	Nucleotide transport and metabolism	K01488,K18286,K19572	F	39 kDa	0.0002297	0.0001695	0.00037473	0.00023847	0.00020317	0.00027166	0	0.000257977	0.000237767	0.92166	-0.117694	3	3
Aminodeoxyfutalosine synthase	G5B5_15990	Metabolism	Coenzyme transport and metabolism	K11779,K18285	H	43 kDa	0.00064186	0.00060895	0.00047681	0.0004498	0.00045621	0.00067777	0	0.000575873	0.000527927	0.916741	-0.125414	3	3
hypothetical protein	G5B5_15830	Metabolism	Carbohydrate transport and metabolism	K01191	G	123 kDa	0.0013074	0.0015699	0.0010956	0.00093289	0.0010408	0.00052479	1	0.0013243	0.000832827	0.628881	-0.669142	3	3
Putative glucose-6-phosphate 1-epimerase	G5B5_09255	Metabolism	Carbohydrate transport and metabolism	K01792	G	34 kDa	0.00051477	0.00050647	0.00059485	0.00048099	0.00036995	0.00016911	1	0.000538697	0.000340017	0.631184	-0.663868	3	3
Aminopeptidase YpdF	G5B5_01725	Metabolism	Amino acid transport and metabolism	K01262,K01271	E	39 kDa	0.00021828	0.00016107	0.00020772	0.00024928	0.00024134	0.0001721	0	0.00019569	0.000220907	1.12886	0.174867	3	3
Anhydro-N-acetylmuramic acid kinase	G5B5_15665	Cellular processing and signaling	Post-translational modification, protein turnover, and chaperones	K09001	O	42 kDa	0.00011114	0.00017221	8.1587e-05	8.3073e-05	0.00015482	7.8861e-05	0	0.000121646	0.000105585	0.867969	-0.204285	3	3
Anthranilate phosphoribosyltransferase	G5B5_13230	Metabolism	Amino acid transport and metabolism	K00766	E	35 kDa	0.00030806	0.0001989	0.00021987	0.00033581	0.000281	0.00021253	0	0.000242277	0.000276447	1.14104	0.190346	3	3
Mycothiol acetyltransferase	G5B5_11125	Poorly characterized	Function unknown	K06976	S	27 kDa	7.2261e-05	0.00011997	8.8414e-05		7.1905e-05		0	9.35483e-05	7.1905e-05	0.76864	-0.37962	3	1
Haloalkane dehalogenase	G5B5_11775	Poorly characterized	Function unknown	K00433	S	28 kDa			0.00016527		0.00013441	0.00011981	0	0.00016527	0.00012711	0.769105	-0.378747	1	2
Anthranilate synthase component 1	G5B5_11640	Metabolism	Amino acid transport and metabolism	K01657,K13503	E	63 kDa	0.00030432	0.00042105	0.00029788	0.00028435	0.00036339	0.00017995	0	0.000341083	0.000275897	0.808883	-0.305996	3	3
N-acetyl-gamma-glutamyl-phosphate reductase	G5B5_02600	Metabolism	Amino acid transport and metabolism	K00145	E	38 kDa	0.00032333	0.00038541	0.00045647	0.00025563	0.00024749	0.00023532	1	0.000388403	0.000246147	0.63374	-0.658037	3	3
Arginine--tRNA ligase	G5B5_13365	Information storage and processing	Translation, ribosomal structure and biogenesis	K01887	J	74 kDa	0.00039548	0.00040856	0.00038711	0.00038184	0.00041977	0.00045213	0	0.00039705	0.000417913	1.05255	0.0738831	3	3
Argininosuccinate lyase	G5B5_02625	Metabolism	Amino acid transport and metabolism	K01755,K14681	E	55 kDa	0.00034979	0.00038716	0.00032099	0.00045756	0.00029586	0.00031026	0	0.000352647	0.00035456	1.00543	0.00780638	3	3
Argininosuccinate synthase	G5B5_02620	Metabolism	Amino acid transport and metabolism	K01940	E	50 kDa	0.0002756	0.0003922	0.00024086	0.00025751	0.00025465	0.00034922	0	0.000302887	0.000287127	0.947967	-0.0770907	3	3
Arylsulfatase	G5B5_14575	Metabolism	Inorganic ion transport and metabolism	K01138	P	54 kDa	0.00050687	0.0003807	0.00028794	0.00045669	0.00048636	0.00040677	0	0.000391837	0.00044994	1.14828	0.19948	3	3
Asparagine--tRNA ligase	G5B5_09155	Information storage and processing	Translation, ribosomal structure and biogenesis	K01893	J	56 kDa	0.00022205	0.00028359	0.00027169	0.00028728	0.00027195	0.00022221	0	0.00025911	0.00026048	1.00529	0.00760791	3	3
hypothetical protein	G5B5_02395	Metabolism	Carbohydrate transport and metabolism	K00856	G	35 kDa	0.00011044	0.0001528	0.00013512	7.7391e-05	0.00010989	6.5304e-05	1	0.000132787	8.4195e-05	0.634062	-0.657304	3	3
hypothetical protein	G5B5_09685	Metabolism	Amino acid transport and metabolism	K01469,K01474	E	57 kDa	4.914e-05	5.4391e-05	8.0166e-05	4.5915e-05	3.2599e-05	3.8744e-05	1	6.12323e-05	3.9086e-05	0.638323	-0.647642	3	3
o-succinylbenzoate synthase	G5B5_15240	Metabolism	Coenzyme transport and metabolism	K02549	H	41 kDa	0.0012779	0.0013097	0.0013319	0.0009287	0.00084774	0.00072768	1	0.0013065	0.000834707	0.638888	-0.646366	3	3
Aspartate--tRNA(Asp/Asn) ligase	G5B5_07760	Information storage and processing	Translation, ribosomal structure and biogenesis	K01876	J	69 kDa	0.0016622	0.0022014	0.0024509	0.0018451	0.001555	0.0017642	0	0.00210483	0.00172143	0.817848	-0.290096	3	3
2-amino-5-chloromuconic acid deaminase	G5B5_12965	Information storage and processing	Translation, ribosomal structure and biogenesis	K01426,K02433	J	45 kDa	0.00012424	0.0001146	0.00012668	5.8043e-05	0.00010302	7.3467e-05	1	0.00012184	7.81767e-05	0.641634	-0.640178	3	3
hypothetical protein	G5B5_14605	Poorly characterized	Function unknown	-	S	16 kDa		0.00019307		0.00016298		0.00013753	0	0.00019307	0.000150255	0.778241	-0.361711	1	2
L-threonine dehydratase catabolic TdcB	G5B5_11795	Metabolism	Amino acid transport and metabolism	K01754	E	35 kDa	0.0011429	0.00092003	0.00095346	0.00065531	0.00067203	0.0006144	1	0.00100546	0.000647247	0.64373	-0.635473	3	3
ATP synthase epsilon chain, sodium ion specific	G5B5_04335	Metabolism	Energy production and conversion	K02114	C	15 kDa	0.00073676	0.0012232	0.00097657	0.0011473	0.00067203	0.00079872	0	0.000978843	0.000872683	0.891545	-0.16562	3	3
hypothetical protein	G5B5_02345	unclassified	unclassified	-	-	25 kDa	0.00031079	0.000258	0.00023766	0.00018149	0.00015463	0.00018378	1	0.000268817	0.0001733	0.644677	-0.633351	3	3
Ribonucleoside-diphosphate reductase subunit beta	G5B5_15805	Metabolism	Nucleotide transport and metabolism	K00526	F	39 kDa	0.00056313	0.00079329	0.00065769	0.00047834	0.00045847	0.00036327	1	0.00067137	0.00043336	0.645486	-0.631542	3	3
ATP synthase subunit b	G5B5_04360	Cellular processing and signaling	Cell wall/membrane/envelope biogenesis	K02109	M	26 kDa	0.00025607	0.00016196	0.00017904	0.00027345	0.00036402	0.00021632	0	0.000199023	0.000284597	1.42997	0.515981	3	3
ATP synthase subunit b	G5B5_04365	Metabolism	Energy production and conversion	K02109	C	17 kDa	0.00050652	0.00037376	0.00048203	0.00042069	0.00033602	0.00046592	0	0.000454103	0.000407543	0.897468	-0.156067	3	3
ATP synthase subunit beta	G5B5_04340	Metabolism	Energy production and conversion	K02112	C	52 kDa	0.0059446	0.0055068	0.0055054	0.0043581	0.0060973	0.0056243	0	0.00565227	0.0053599	0.948274	-0.0766234	3	3
Aspartate carbamoyltransferase catalytic subunit	G5B5_13090	Metabolism	Nucleotide transport and metabolism	K00609	F	35 kDa	0.00085516	0.00088344	0.00073243	0.00055933	0.00053894	0.00050568	1	0.000823677	0.00053465	0.649102	-0.623483	3	3
ATP-dependent Clp protease proteolytic subunit	G5B5_14925	Cellular processing and signaling	Post-translational modification, protein turnover, and chaperones	K01358	O	21 kDa	0.0015629	0.0013737	0.0017998	0.0015892	0.0015552	0.0015222	0	0.0015788	0.00155553	0.985263	-0.0214191	3	3
ATP-dependent DNA helicase Rep	G5B5_08515	Information storage and processing	Replication, recombination and repair	K03657	L	104 kDa	1.872e-05	6.2161e-05	2.2905e-05	5.2474e-05	1.8628e-05		0	3.45953e-05	3.5551e-05	1.02762	0.0393127	3	2
ATP-dependent protease ATPase subunit ClpY	G5B5_09885	Cellular processing and signaling	Post-translational modification, protein turnover, and chaperones	K03667	O	60 kDa	0.00058208	0.00044741	0.00027697	0.00040791	0.00040223	0.00053542	0	0.000435487	0.00044852	1.02993	0.0425438	3	3
ATP-dependent protease subunit HslV	G5B5_09880	Cellular processing and signaling	Post-translational modification, protein turnover, and chaperones	K01419	O	22 kDa	0.00026339	0.00038871	0.00032227	0.00020509	0.00030578	0.00020767	0	0.00032479	0.000239513	0.737441	-0.439401	3	3
S-methyl-5'-thioadenosine phosphorylase	G5B5_02400	Metabolism	Coenzyme transport and metabolism	K00772	H	31 kDa	0.0015602	0.001456	0.0022458	0.0012005	0.0010959	0.0011215	1	0.001754	0.0011393	0.649544	-0.622501	3	3
Quinone oxidoreductase 1	G5B5_13505	Metabolism	Energy production and conversion	K00344	C	35 kDa	0.0011311	0.0012222	0.001384	0.00088074	0.00091116	0.00066887	1	0.00124577	0.000820257	0.658435	-0.602887	3	3
Virginiamycin B lyase	G5B5_05895	unclassified	unclassified	-	-	38 kDa			9.078e-05	6.9325e-05	7.3829e-05		0	9.078e-05	7.1577e-05	0.788467	-0.342878	1	2
Ribokinase	G5B5_05280	Metabolism	Carbohydrate transport and metabolism	K00852	G	31 kDa			6.9082e-05	5.2755e-05	5.6183e-05		0	6.9082e-05	5.4469e-05	0.788469	-0.342874	1	2
Aurachin B dehydrogenase	G5B5_05380	Cellular processing and signaling	Cell wall/membrane/envelope biogenesis	K01709	M	31 kDa	0.00056547	0.00049413	0.00076471	0.00069521	0.00065153	0.00042237	0	0.000608103	0.000589703	0.969742	-0.0443271	3	3
Bacterioferritin	G5B5_07725	Metabolism	Inorganic ion transport and metabolism	K03594	P	18 kDa	0.0018222	0.0040338	0.0011485	0.0045403	0.0023077	0.003657	0	0.00233483	0.00350167	1.49975	0.584722	3	3
Beta sliding clamp	G5B5_09110	Information storage and processing	Replication, recombination and repair	K02338	L	43 kDa	0.00080425	0.0010633	0.00073802	0.0011481	0.00082252	0.00089831	0	0.000868523	0.00095631	1.10108	0.138914	3	3
Beta-barrel assembly-enhancing protease	G5B5_01055	Poorly characterized	Function unknown	-	S	47 kDa	7.9275e-05	0.00010968	0.00014549	0.00012963	0.00011833	0.00014063	0	0.000111482	0.00012953	1.1619	0.21648	3	3
Beta-barrel assembly-enhancing protease	G5B5_00230	Poorly characterized	Function unknown	-	S	76 kDa	0.00016422	0.00016779	0.0002473	0.00028329	0.00022627	0.00019422	0	0.000193103	0.000234593	1.21486	0.280789	3	3
Beta-barrel assembly-enhancing protease	G5B5_05955	unclassified	unclassified	-	-	11 kDa	0.002238	0.0014291	0.0016851	0.0020107	0.0020556	0.0022396	0	0.00178407	0.00210197	1.17819	0.23657	3	3
Beta-galactosidase	G5B5_12840	Metabolism	Carbohydrate transport and metabolism	K01190	G	95 kDa	4.1365e-05	4.5785e-05	5.0612e-05	6.7638e-05	6.1742e-05	2.446e-05	0	4.59207e-05	5.128e-05	1.11671	0.159253	3	3
Beta-galactosidase BoGH2A	G5B5_02035	Metabolism	Carbohydrate transport and metabolism	K01190	G	97 kDa	0.0003107	0.0006656	0.00040468	0.00051506	0.00045876	0.00024892	0	0.000460327	0.00040758	0.885415	-0.175575	3	3
Beta-glucosidase	G5B5_02910	Metabolism	Carbohydrate transport and metabolism	K05350	G	58 kDa	8.4258e-05	0.00011191	6.1856e-05	0.0001732	8.3843e-05	7.9719e-05	0	8.6008e-05	0.000112254	1.30516	0.384224	3	3
Beta-glucuronidase	G5B5_05855	Metabolism	Carbohydrate transport and metabolism	K01195	G	70 kDa	2.7961e-05	4.6423e-05	5.1317e-05	3.9189e-05		6.6136e-05	0	4.19003e-05	5.26625e-05	1.25685	0.329814	3	2
Aldo-keto reductase YhdN	G5B5_11280	Metabolism	Energy production and conversion	-	C	35 kDa	0.0030621	0.0028494	0.004277	0.0025319	0.0023459	0.0018588	1	0.00339617	0.00224553	0.661196	-0.596849	3	3
Beta-xylosidase	G5B5_00775	Metabolism	Carbohydrate transport and metabolism	K01198	G	59 kDa	9.9959e-05	7.376e-05		9.3398e-05	8.2889e-05		0	8.68595e-05	8.81435e-05	1.01478	0.0211705	2	2
Bifunctional enzyme IspD/IspF	G5B5_03330	Metabolism	Lipid transport and metabolism	K01770,K12506	I	22 kDa	0.00021414	0.00037923	0.00031441	0.00032014	0.00046879	0.0003039	0	0.000302593	0.000364277	1.20385	0.267654	3	3
Bifunctional ligase/repressor BirA	G5B5_10590	Metabolism	Coenzyme transport and metabolism	K03524	H	29 kDa	6.432e-05	0.00014239	0.00023609	0.0001803	0.00019201	0.00015214	0	0.0001476	0.000174817	1.18439	0.24415	3	3
Bifunctional NAD(P)H-hydrate repair enzyme Nnr	G5B5_05065	Metabolism	Carbohydrate transport and metabolism	K17758,K17759	G	57 kDa	0.00035931	0.000415	0.00038229	0.00030654	0.00037309	0.00036952	0	0.000385533	0.000349717	0.907098	-0.140669	3	3
Bifunctional protein FolD protein	G5B5_12190	Metabolism	Coenzyme transport and metabolism	K01491	H	32 kDa	0.00031873	0.00035279	0.00042544	0.00046026	0.00040366	0.00041122	0	0.000365653	0.000425047	1.16243	0.217145	3	3
Bifunctional protein GlmU	G5B5_01320	Cellular processing and signaling	Cell wall/membrane/envelope biogenesis	K04042,K11528	M	50 kDa		4.1265e-05	4.5615e-05	3.4834e-05	3.7097e-05	6.6136e-05	0	4.344e-05	4.60223e-05	1.05945	0.08331	2	3
Bifunctional protein PyrR	G5B5_10495	Metabolism	Nucleotide transport and metabolism	K02825	F	22 kDa	0.00048776	0.0004908	0.00043403	0.00049718	0.00039711	0.00047197	0	0.000470863	0.00045542	0.967202	-0.0481107	3	3
Bifunctional purine biosynthesis protein PurH	G5B5_00225	Metabolism	Nucleotide transport and metabolism	K00602	F	55 kDa	0.0023176	0.0017226	0.0019456	0.0015806	0.0013803	0.0022007	0	0.00199527	0.00172053	0.862307	-0.213726	3	3
Biodegradative arginine decarboxylase	G5B5_13535	Metabolism	Amino acid transport and metabolism	K01584	E	90 kDa	0.00018404	0.00044335	0.0003179	0.00043496	0.00039858	0.00026887	0	0.000315097	0.00036747	1.16621	0.221832	3	3
Biopolymer transport protein ExbB	G5B5_08585	Cellular processing and signaling	Intracellular trafficking, secretion, and vesicular transport	K03561,K03562	U	26 kDa	0.0014399	0.0016715	0.0015899	0.0015751	0.0017123	0.0016198	0	0.0015671	0.00163573	1.0438	0.0618403	3	3
Biopolymer transport protein ExbD	G5B5_08580	Metabolism	Inorganic ion transport and metabolism	K03559,K03560	P	16 kDa	0.0021501	0.0021154	0.0019	0.002288	0.0017829	0.0020484	0	0.00205517	0.00203977	0.992507	-0.0108513	3	3
Biopolymer transport protein ExbD	G5B5_08575	Metabolism	Inorganic ion transport and metabolism	K03559	P	15 kDa	0.00054873	0.00053988	0.0004476	0.00056969	0.00042469	0.00057685	0	0.00051207	0.000523743	1.0228	0.0325189	3	3
Biotin carboxyl carrier protein of acetyl-CoA carboxylase	G5B5_01720	Metabolism	Lipid transport and metabolism	K02160	I	17 kDa	0.0019222	0.0025876	0.002479	0.0019902	0.0019644	0.0021504	0	0.0023296	0.002035	0.873541	-0.195053	3	3
3-oxoacyl-[acyl-carrier-protein] reductase FabG	G5B5_13560	unclassified	unclassified	K00059,K03793	I, Q	26 kDa	0.00041643	0.00034569	0.00038214	0.00022697	0.00020719	0.00032833	1	0.00038142	0.000254163	0.666361	-0.585625	3	3
Biphenyl dioxygenase system ferredoxin subunit	G5B5_00635	Metabolism	Energy production and conversion	K00363	C	11 kDa	0.00051144	0.00028304		0.00047787	0.0004241	0.00050405	0	0.00039724	0.000468673	1.17982	0.238572	2	3
hypothetical protein	G5B5_00730	Metabolism	Energy production and conversion	-	C	37 kDa	0.00010209	0.0001695	0.00015614	9.5389e-05	0.00010159	9.0553e-05	1	0.000142577	9.5844e-05	0.672228	-0.572978	3	3
hypothetical protein	G5B5_02960	unclassified	unclassified	-	-	12 kDa		0.00018336	0.00020269	0.00015478			0	0.000193025	0.00015478	0.801865	-0.318569	2	1
Penicillinase repressor	G5B5_01615	Information storage and processing	Transcription	-	K	16 kDa		0.00013687	0.0001513	0.00011554			0	0.000144085	0.00011554	0.801888	-0.318528	2	1
L-allo-threonine aldolase	G5B5_03495	Metabolism	Amino acid transport and metabolism	K01620	E	37 kDa	0.0015614	0.0012183	0.0011901	0.00093276	0.00099336	0.00075681	1	0.00132327	0.00089431	0.675835	-0.565257	3	3
Carbamoyl dehydratase HypE	G5B5_15490	Cellular processing and signaling	Post-translational modification, protein turnover, and chaperones	K04655	O	36 kDa		5.6172e-05	6.2094e-05	4.7419e-05	5.05e-05	9.0029e-05	0	5.9133e-05	6.26493e-05	1.05946	0.0833357	2	3
Carbamoyl-phosphate synthase large chain	G5B5_00645	Metabolism	Nucleotide transport and metabolism	K01955	F	119 kDa	0.0001608	0.00030257	0.00023609	0.00027796	0.00027201	0.00018066	0	0.000233153	0.000243543	1.04456	0.0628994	3	3
Glutamate synthase [NADPH] small chain	G5B5_02020	Metabolism	Amino acid transport and metabolism	K00266,K00528,K17722	E	47 kDa	0.00041247	0.00041306	0.00045661	0.00031199	0.00025408	0.00030198	1	0.00042738	0.00028935	0.677032	-0.562704	3	3
Diaminopimelate decarboxylase	G5B5_15035	Metabolism	Amino acid transport and metabolism	K01586	E	44 kDa	0.00023555	0.00033183	0.00023581	0.00020008	0.00019178	0.00015195	1	0.00026773	0.00018127	0.677063	-0.562639	3	3
hypothetical protein	G5B5_04110	Metabolism	Carbohydrate transport and metabolism	-	G	85 kDa	0.00026259	0.00030329	0.00030732	0.00020269	0.00021586	0.00017553	1	0.000291067	0.000198027	0.680348	-0.555655	3	3
Carboxymethylenebutenolidase	G5B5_00490	Metabolism	Secondary metabolites biosynthesis, transport, and catabolism	K01061	Q	25 kDa	0.0045399	0.004319	0.0061975	0.0052586	0.006011	0.0035942	0	0.0050188	0.0049546	0.987208	-0.0185739	3	3
Carboxypeptidase G2	G5B5_09245	Metabolism	Amino acid transport and metabolism	K01295	E	40 kDa	0.00029957	0.00030607	0.00019737	0.00025838	0.0002293	0.00029978	0	0.00026767	0.000262487	0.980635	-0.0282113	3	3
Carboxy-terminal processing protease CtpA	G5B5_02525	Cellular processing and signaling	Cell wall/membrane/envelope biogenesis	K03797	M	44 kDa	0.00038265	0.00035295	0.00033814	0.00039726	0.00044423	0.00032684	0	0.000357913	0.000389443	1.08809	0.121803	3	3
Catalase-peroxidase	G5B5_04990	Metabolism	Inorganic ion transport and metabolism	K03782	P	82 kDa	0.0027429	0.0028933	0.0033274	0.002782	0.0025545	0.0022181	0	0.00298787	0.0025182	0.842809	-0.246723	3	3
Putative mycofactocin system creatinine amidohydrolase family protein MftE	G5B5_12980	Poorly characterized	Function unknown	K01470	S	28 kDa	0.00016628	0.00018405	0.00016276	9.3221e-05	9.9278e-05	0.00015732	1	0.00017103	0.000116606	0.681789	-0.552603	3	3
Cell division protein FtsZ	G5B5_05075	Cellular processing and signaling	Cell cycle control, cell division, chromosome partitioning	K03531	D	60 kDa	0.00083322	0.00073439	0.00088733	0.00076412	0.00072164	0.00067519	0	0.000818313	0.000720317	0.880246	-0.184022	3	3
Cell division protein ZapA	G5B5_08460	Poorly characterized	Function unknown	K09888	S	15 kDa	0.0004486	0.00035466	0.0010978	0.0010778	0.00038262	0.00053054	0	0.000633687	0.000663653	1.04729	0.0666602	3	3
Chaperone protein ClpB 1	G5B5_09220	Cellular processing and signaling	Post-translational modification, protein turnover, and chaperones	K03695,K03696	O	97 kDa	0.00069918	0.00097289	0.00081881	0.00090528	0.00057647	0.00051976	0	0.000830293	0.00066717	0.803535	-0.315567	3	3
Chaperone protein DnaJ	G5B5_05980	Cellular processing and signaling	Post-translational modification, protein turnover, and chaperones	K03686	O	41 kDa	4.67e-05	5.1691e-05		8.7271e-05	4.647e-05		0	4.91955e-05	6.68705e-05	1.35928	0.442844	2	2
Chaperone protein DnaK	G5B5_13925	Cellular processing and signaling	Post-translational modification, protein turnover, and chaperones	K04043	O	68 kDa	0.011068	0.013288	0.014975	0.015003	0.012343	0.012502	0	0.0131103	0.0132827	1.01314	0.0188404	3	3
Chaperone protein DnaK	G5B5_10210	Cellular processing and signaling	Post-translational modification, protein turnover, and chaperones	K04043,K04044	O	71 kDa	0.00013242	0.00016123	0.00014582	0.0001856	0.00018448	0.00015661	0	0.00014649	0.000175563	1.19847	0.261189	3	3
Chaperone SurA	G5B5_03555	Cellular processing and signaling	Post-translational modification, protein turnover, and chaperones	K01802,K03769,K03770,K03771	O	70 kDa	0.00048255	0.00044509	0.00059042	0.0004634	0.0003868	0.00045972	0	0.00050602	0.00043664	0.862891	-0.21275	3	3
Chaperone SurA	G5B5_08210	Cellular processing and signaling	Post-translational modification, protein turnover, and chaperones	K03771	O	39 kDa	0.00057695	0.0006386	0.00058315	0.00070315	0.00067395	0.000445	0	0.000599567	0.000607367	1.01301	0.0186476	3	3
Chaperone SurA	G5B5_04475	Cellular processing and signaling	Post-translational modification, protein turnover, and chaperones	K03769,K03771,K07533	O	70 kDa	0.00097103	0.0015674	0.0014521	0.0012853	0.0015567	0.0012919	0	0.00133018	0.00137797	1.03593	0.0509231	3	3
Coenzyme PQQ synthesis protein E	G5B5_07845	Poorly characterized	Function unknown	-	S	39 kDa			6.0863e-05		4.9498e-05		0	6.0863e-05	4.9498e-05	0.813269	-0.298195	1	1
Chorismate synthase	G5B5_04450	Metabolism	Amino acid transport and metabolism	K01736	E	42 kDa	0.00011199	0.00017353	0.00027404	0.00020927	8.9147e-05	0.00026488	0	0.00018652	0.000187766	1.00668	0.00960295	3	3
hypothetical protein	G5B5_13890	unclassified	unclassified	-	-	46 kDa	0.0019023	0.0014808	0.0014323	0.00089848	0.0013521	0.0010383	1	0.00160513	0.00109629	0.682992	-0.550059	3	3
Chromosome partition protein Smc	G5B5_16450	Cellular processing and signaling	Cell cycle control, cell division, chromosome partitioning	K03529	D	143 kDa	0.00014183	0.00024668	0.00023137	0.00034707	0.00021505	0.00027955	0	0.000206627	0.000280557	1.3578	0.441266	3	3
Citrate synthase 2	G5B5_15105	Metabolism	Energy production and conversion	K01647,K01659	C	43 kDa	0.0012219	0.0013775	0.0015781	0.0014166	0.0015311	0.001124	0	0.0013925	0.00135723	0.974674	-0.0370086	3	3
Cob(I)yrinic acid a,c-diamide adenosyltransferase	G5B5_00275	Poorly characterized	Function unknown	K00798	S	21 kDa	0.00050564	0.00035615	0.00022497	0.0003436	0.00041167	0.00048927	0	0.000362253	0.000414847	1.14518	0.195579	3	3
Cocaine esterase	G5B5_12985	Poorly characterized	Function unknown	K06978	S	63 kDa	0.00010839	0.00013711	7.5783e-05	4.3405e-05	7.7041e-05	3.6626e-05	0	0.000107094	5.23573e-05	0.48889	-1.03242	3	3
Cocaine esterase	G5B5_06360	Poorly characterized	Function unknown	K06978	S	73 kDa	0.0003055	0.00036754	0.00037379	0.0003475	0.00038329	0.00023563	0	0.000348943	0.00032214	0.923187	-0.115305	3	3
Cocaine esterase	G5B5_05560	Poorly characterized	Function unknown	K06978	S	71 kDa	9.6178e-05	0.00010646	0.00013449	0.00017973	9.5704e-05	0.00013	0	0.000112376	0.000135145	1.20261	0.266171	3	3
Cocaine esterase	G5B5_03265	Poorly characterized	Function unknown	K06978	S	71 kDa	2.7351e-05	4.541e-05	5.0198e-05	7.6668e-05	4.0825e-05		0	4.09863e-05	5.87465e-05	1.43332	0.51936	3	2
Co-chaperone protein HscB	G5B5_10240	Cellular processing and signaling	Post-translational modification, protein turnover, and chaperones	K04082	O	24 kDa	0.00096619	0.0011159	0.001542	0.0011775	0.0010868	0.001093	0	0.00120803	0.0011191	0.926384	-0.110317	3	3
Beta-barrel assembly-enhancing protease	G5B5_13410	Cellular processing and signaling	Post-translational modification, protein turnover, and chaperones	-	O	48 kDa		6.4642e-05	4.7638e-05			4.6046e-05	0	5.614e-05	4.6046e-05	0.8202	-0.285953	2	1
Coenzyme PQQ synthesis protein E	G5B5_09445	Poorly characterized	Function unknown	-	S	78 kDa	3.7735e-05	9.7457e-05	7.6951e-05	0.00011753	0.00017523	8.9255e-05	0	7.07143e-05	0.000127338	1.80074	0.848592	3	3
Cold shock protein CspB	G5B5_15125	Information storage and processing	Transcription	K03704	K	8 kDa	0.0024732	0.0026005	0.0025721	0.0021953	0.0029532	0.0027786	0	0.0025486	0.00264237	1.03679	0.0521257	3	3
Cold shock protein CspC	G5B5_03410	Information storage and processing	Transcription	K03704	K	7 kDa	0.00079815	0.0007362	0.00097657	0.00062148	0.00079422	0.00078662	0	0.000836973	0.000734107	0.877097	-0.189192	3	3
Cold shock protein CspC	G5B5_04670	Information storage and processing	Transcription	K03704	K	7 kDa	0.0019954	0.0017669	0.0016276	0.0017401	0.0022503	0.0028318	0	0.00179663	0.00227407	1.26574	0.339979	3	3
contamination	K1C10_HUMAN	Cellular processing and signaling	Cytoskeleton	-	-	60 kDa	0.0063368	0.011914	0.0069019	0.0065157	0.0076462	0.010629	0	0.00838423	0.00826363	0.985616	-0.0209026	3	3
contamination	K22E_HUMAN	Cellular processing and signaling	Cytoskeleton	-	-	66 kDa	0.0040836	0.0065539	0.0038806	0.0044261	0.0048762	0.006069	0	0.00483937	0.00512377	1.05877	0.0823865	3	3
contamination	K1C9_HUMAN	Cellular processing and signaling	Cytoskeleton	-	-	62 kDa	0.0082724	0.0052567	0.0044487	0.0056621	0.0079371	0.0068334	0	0.0059926	0.00681087	1.13655	0.184656	3	3
contamination	K2C1_HUMAN	Cellular processing and signaling	Cytoskeleton	-	-	66 kDa	0.012535	0.012423	0.0087709	0.010768	0.013247	0.014437	0	0.011243	0.0128173	1.14003	0.189073	3	3
contamination	K1C15_SHEEP	Cellular processing and signaling	Cytoskeleton	-	-	49 kDa	0.00029072	0.0005363		0.00030786	0.00042429	0.00082517	0	0.00041351	0.000519107	1.25537	0.328109	2	3
contamination	TRYP_PIG	Metabolism	Amino acid transport and metabolism	-	-	24 kDa	0.015621	0.013167	0.018741	0.011968	0.012594	0.01789	0	0.015843	0.0141507	0.893181	-0.162976	3	3
CTP pyrophosphohydrolase	G5B5_13845	Information storage and processing	Replication, recombination and repair	K03574	L	17 kDa					0.0001713	0.00013573	0		0.000153515			0	2
Cyclic dehypoxanthine futalosine synthase	G5B5_06275	Metabolism	Coenzyme transport and metabolism	K11784	H	39 kDa	0.00055504	0.00075397	0.00061737	0.00051861	0.00070293	0.0004774	0	0.000642127	0.000566313	0.881934	-0.181257	3	3
Cyclic-di-GMP-binding biofilm dispersal mediator protein	G5B5_04145	Poorly characterized	Function unknown	K00059	S	25 kDa					0.00010654	8.4418e-05	0		9.5479e-05			0	2
Cyclohexadienyl dehydrogenase	G5B5_07580	Metabolism	Amino acid transport and metabolism	K00210,K00220,K00800,K04517,K15226	E	31 kDa	0.00012194		0.0001865	5.6969e-05	0.00012134	7.2107e-05	0	0.00015422	8.3472e-05	0.541253	-0.885626	2	3
Cystathionine gamma-lyase	G5B5_03665	Metabolism	Amino acid transport and metabolism	K01739,K01758,K01760	E	41 kDa	0.0011119	0.00076922	0.00087866	0.00058442	0.0008068	0.00079451	0	0.000919927	0.000728577	0.791994	-0.336438	3	3
3-isopropylmalate dehydratase small subunit	G5B5_04780	Metabolism	Amino acid transport and metabolism	K01704	E	24 kDa	0.0013667	0.0010543	0.0014695	0.00077391	0.00090661	0.00097956	1	0.00129683	0.000886693	0.683737	-0.548486	3	3
Cysteine desulfurase NifS	G5B5_02060	Metabolism	Amino acid transport and metabolism	K04487	E	42 kDa	0.00024084	0.00019387	0.00032147	0.00026595	0.00023965	0.00020715	0	0.00025206	0.000237583	0.942567	-0.0853336	3	3
Dipeptidyl aminopeptidase BI	G5B5_03455	Metabolism	Amino acid transport and metabolism	K01322,K01354	E	79 kDa	0.0012344	0.00097596	0.0014487	0.00074149	0.00085234	0.00090873	1	0.00121969	0.000834187	0.683935	-0.548068	3	3
Cysteine--tRNA ligase	G5B5_10420	Information storage and processing	Translation, ribosomal structure and biogenesis	K01883	J	55 kDa	8.8505e-05	0.00017633	0.00019492	0.00019847	0.0001233	0.00012561	0	0.000153252	0.000149127	0.973083	-0.0393645	3	3
Cys-tRNA(Pro)/Cys-tRNA(Cys) deacylase YbaK	G5B5_14870	Poorly characterized	Function unknown	K03976	S	18 kDa	0.00015585	0.00023001	0.00031782	0.00038833	0.00020678	0.00018432	0	0.00023456	0.00025981	1.10765	0.1475	3	3
Fructokinase	G5B5_00400	Metabolism	Carbohydrate transport and metabolism	K00845,K00847	G	31 kDa	0.00089825	0.00086594	0.0012054	0.00064978	0.00066316	0.00071964	1	0.000989863	0.000677527	0.684465	-0.546952	3	3
Cytosol aminopeptidase	G5B5_13385	Metabolism	Amino acid transport and metabolism	K01255,K07751	E	55 kDa	0.0013069	0.0015022	0.0013735	0.00086105	0.00091699	0.0011097	1	0.0013942	0.00096258	0.690417	-0.534459	3	3
D-3-phosphoglycerate dehydrogenase	G5B5_08195	Metabolism	Amino acid transport and metabolism	K00058,K16843	E	58 kDa	0.00095087	0.0011577	0.00091135	0.00094769	0.0010881	0.0010121	0	0.00100664	0.00101596	1.00926	0.0133005	3	3
D-alanine--D-alanine ligase	G5B5_06685	Metabolism	Amino acid transport and metabolism	K01457,K01941,K01961,K01965	E	131 kDa	0.00054965	0.00071383	0.00059181	0.00054096	0.00074384	0.00037269	0	0.00061843	0.000552497	0.893386	-0.162645	3	3
D-alanine--D-alanine ligase A	G5B5_09125	Cellular processing and signaling	Cell wall/membrane/envelope biogenesis	K01921	M	40 kDa	9.5173e-05	0.00018435	8.7336e-05	0.00013339	0.00014206	0.0001407	0	0.000122286	0.000138717	1.13436	0.181878	3	3
Daunorubicin/doxorubicin resistance ATP-binding protein DrrA	G5B5_11735	Cellular processing and signaling	Defense mechanisms	K01990	V	34 kDa		6.1505e-05	6.7989e-05	7.7881e-05	0.00011059	6.5718e-05	0	6.4747e-05	8.47297e-05	1.30863	0.388054	2	3
dCTP deaminase	G5B5_03235	Metabolism	Nucleotide transport and metabolism	K01494	F	21 kDa	0.00038173	0.00042251	0.0006422	0.00035667	0.00042733	0.00067718	0	0.000482147	0.00048706	1.01019	0.0146274	3	3
ATP phosphoribosyltransferase	G5B5_11435	Metabolism	Amino acid transport and metabolism	K00765	E	32 kDa	0.002112	0.0019703	0.003027	0.001776	0.0019514	0.0012132	1	0.00236977	0.00164687	0.694949	-0.525021	3	3
Deoxyhypusine synthase-like protein	G5B5_04525	Cellular processing and signaling	Post-translational modification, protein turnover, and chaperones	K00809	O	39 kDa	0.0060189	0.0046249	0.0052951	0.0046479	0.0050983	0.0054711	0	0.00531297	0.00507243	0.954727	-0.0668397	3	3
Deoxyribose-phosphate aldolase	G5B5_15780	Metabolism	Nucleotide transport and metabolism	K01619	F	37 kDa	0.00041316	0.00037156	0.00028436	0.00026541	0.00038543	0.00033593	0	0.00035636	0.000328923	0.923009	-0.115584	3	3
Deoxyuridine 5'-triphosphate nucleotidohydrolase	G5B5_07655	Metabolism	Nucleotide transport and metabolism	K01520	F	16 kDa	0.00045609	0.00075723	0.00069755	0.00063923	0.00051057	0.00060682	0	0.000636957	0.00058554	0.919278	-0.121427	3	3
Dephospho-CoA kinase	G5B5_12185	Metabolism	Coenzyme transport and metabolism	K00859	H	23 kDa	0.00024054	0.00022187	0.00019621	0.00022475	0.00019946	0.00023706	0	0.00021954	0.000220423	1.00402	0.00579313	3	3
Glutamine-dependent NAD(+) synthetase	G5B5_16410	Metabolism	Coenzyme transport and metabolism	K01916,K01950	H	60 kDa	0.00050531	0.000402	0.00036709	0.00029509	0.00032997	0.00026145	1	0.0004248	0.000295503	0.695629	-0.523609	3	3
Diacetyl reductase [(S)-acetoin forming]	G5B5_11780	Poorly characterized	Function unknown	-	S	26 kDa	0.00049364	0.00062444	0.00069027	0.00049419	0.00049121	0.00075061	0	0.000602783	0.00057867	0.959997	-0.0588987	3	3
Inosine-5'-monophosphate dehydrogenase	G5B5_05655	Metabolism	Nucleotide transport and metabolism	K00088	F	54 kDa	0.0030425	0.0031174	0.0030206	0.0019006	0.0021106	0.0023851	1	0.00306017	0.0021321	0.696727	-0.521335	3	3
Diaminopimelate epimerase	G5B5_02375	Metabolism	Amino acid transport and metabolism	K01778	E	29 kDa	0.00032397	0.00028687	0.00031712	0.0002119	0.0002579	0.00034484	0	0.00030932	0.000271547	0.877883	-0.1879	3	3
Dihydroanticapsin 7-dehydrogenase	G5B5_05275	Poorly characterized	Function unknown	-	S	25 kDa	0.00022041	8.1321e-05	0.00026968	0.00010297	0.00014622	0.00013034	0	0.00019047	0.00012651	0.664198	-0.590315	3	3
Dihydrolipoyl dehydrogenase	G5B5_09410	Metabolism	Energy production and conversion	K00382	C	53 kDa	0.00046397	0.0005728	0.00052401	0.00060025	0.00046168	0.00059092	0	0.00052026	0.00055095	1.05899	0.0826886	3	3
Dihydrolipoyllysine-residue acetyltransferase component of pyruvate dehydrogenase complex	G5B5_09395	Metabolism	Energy production and conversion	K00627,K00658,K09699	C	55 kDa	0.0004243	0.00066833	0.00059901	0.00062517	0.0005846	0.0006948	0	0.00056388	0.000634857	1.12587	0.171043	3	3
Dihydroorotase	G5B5_13085	Metabolism	Nucleotide transport and metabolism	K01464,K01465,K01466	F	45 kDa	0.0004262	0.00037739	0.00031288	0.00025885	0.00031807	0.00025202	0	0.000372157	0.000276313	0.742465	-0.429605	3	3
Cysteine desulfurase IscS	G5B5_10280	Metabolism	Amino acid transport and metabolism	K04487	E	46 kDa	0.0012246	0.0015622	0.0013714	0.00085332	0.00092941	0.0011292	1	0.00138607	0.000970643	0.700286	-0.513983	3	3
Methylthioribose-1-phosphate isomerase	G5B5_03105	Information storage and processing	Translation, ribosomal structure and biogenesis	K08963	J	37 kDa	0.0011133	0.00092417	0.00092873	0.00070923	0.00083084	0.00053862	1	0.000988733	0.000692897	0.700792	-0.512941	3	3
Thioredoxin reductase	G5B5_12930	Cellular processing and signaling	Post-translational modification, protein turnover, and chaperones	K00384,K03671	O	34 kDa	0.00071784	0.00070286	0.0011823	0.00064493	0.00065935	0.00052243	1	0.000867667	0.000608903	0.701771	-0.510928	3	3
Dipeptidyl carboxypeptidase	G5B5_09160	Metabolism	Amino acid transport and metabolism	K01284,K01414	E	78 kDa	0.00016259	0.00027686	0.00026014	0.0003272	0.00028624	0.00022187	0	0.000233197	0.000278437	1.194	0.255802	3	3
Peroxiredoxin Bcp	G5B5_13125	Cellular processing and signaling	Post-translational modification, protein turnover, and chaperones	K03564	O	17 kDa		0.00012787		0.00010794			0	0.00012787	0.00010794	0.844139	-0.244448	1	1
hypothetical protein	G5B5_09420	unclassified	unclassified	-	-	98 kDa		2.0765e-05		1.7529e-05			0	2.0765e-05	1.7529e-05	0.844161	-0.24441	1	1
hypothetical protein	G5B5_08385	unclassified	unclassified	-	-	98 kDa		3.1758e-05		2.6809e-05			0	3.1758e-05	2.6809e-05	0.844165	-0.244403	1	1
Nicotinate dehydrogenase small FeS subunit	G5B5_06105	Metabolism	Energy production and conversion	K03518	C	18 kDa		0.00017353		0.00014649			0	0.00017353	0.00014649	0.844177	-0.244383	1	1
hypothetical protein	G5B5_04495	Metabolism	Carbohydrate transport and metabolism	-	G	101 kDa		2.0787e-05		1.7548e-05			0	2.0787e-05	1.7548e-05	0.844181	-0.244375	1	1
tRNA-specific adenosine deaminase	G5B5_02970	unclassified	unclassified	K01485,K01487,K01489,K04075,K11991	F, J	17 kDa		0.00011708		9.8837e-05			0	0.00011708	9.8837e-05	0.844183	-0.244372	1	1
Dipeptidyl-peptidase 5	G5B5_12565	Metabolism	Amino acid transport and metabolism	K01303	E	75 kDa				5.9532e-05	2.536e-05		0		4.2446e-05			0	2
D-mannonate dehydratase	G5B5_12655	Cellular processing and signaling	Cell wall/membrane/envelope biogenesis	K01706,K08323	M	45 kDa	6.552e-05	4.8347e-05			4.3465e-05	5.1659e-05	0	5.69335e-05	4.7562e-05	0.835396	-0.259468	2	2
Sorbitol dehydrogenase	G5B5_00795	Metabolism	Energy production and conversion	K00008	C	38 kDa	0.00045954	0.0004551	0.00038471	0.00031639	0.00031288	0.00028604	1	0.000433117	0.000305103	0.704437	-0.505458	3	3
DNA gyrase subunit A	G5B5_08865	Information storage and processing	Replication, recombination and repair	K02469	L	103 kDa	0.00015089	0.00042796	0.00021923	0.00026434	0.00026275	0.00015614	0	0.000266027	0.000227743	0.856092	-0.224162	3	3
DNA protection during starvation protein	G5B5_02260	Metabolism	Inorganic ion transport and metabolism	K04047	P	19 kDa	0.0058531	0.0072742	0.0067218	0.0065244	0.0060287	0.0037647	0	0.00661637	0.00543927	0.822093	-0.282627	3	3
Delta-aminolevulinic acid dehydratase	G5B5_09430	Metabolism	Coenzyme transport and metabolism	K01698	H	34 kDa	0.0014914	0.0015885	0.0018592	0.0012621	0.0012321	0.0009984	1	0.00164637	0.0011642	0.707133	-0.499947	3	3
DNA topoisomerase 1	G5B5_04840	Information storage and processing	Replication, recombination and repair	K03168	L	108 kDa	7.2485e-05	0.00018052	0.00013303	8.4659e-05	9.9175e-05	0.00010716	0	0.000128678	9.6998e-05	0.753802	-0.407742	3	3
DNA-binding protein HU	G5B5_03240	Information storage and processing	Replication, recombination and repair	K03530,K05788	L	10 kDa	0.00069054	0.00032757	0.0006035	0.00055304	0.0007853	0.0007	0	0.000540537	0.000679447	1.25699	0.329968	3	3
Acetyltransferase YpeA	G5B5_12010	Information storage and processing	Transcription	K00657	K	20 kDa	0.0001973	0.00027297	0.0002414	0.00018435	0.00014724	0.000175	1	0.000237223	0.000168863	0.711833	-0.49039	3	3
DNA-binding protein HU 1	G5B5_06390	Information storage and processing	Replication, recombination and repair	K03530,K05788	L	12 kDa	0.00056383	0.0010699	0.00068987	0.00082787	0.00080151	0.0010479	0	0.000774533	0.000892427	1.15221	0.204406	3	3
3-deoxy-D-manno-octulosonate 8-phosphate phosphatase KdsC	G5B5_15945	Poorly characterized	Function unknown	K00983,K03270	S	20 kDa	0.00086832	0.0012281	0.00094438	0.00085641	0.00062403	0.00068462	1	0.0010136	0.000721687	0.712003	-0.490044	3	3
hypothetical protein	G5B5_13755	Metabolism	Inorganic ion transport and metabolism	-	P	98 kDa		2.1381e-05	2.3635e-05		1.9222e-05		0	2.2508e-05	1.9222e-05	0.854007	-0.227679	2	1
UDP-N-acetylenolpyruvoylglucosamine reductase	G5B5_00865	Cellular processing and signaling	Cell wall/membrane/envelope biogenesis	K00075	M	42 kDa	0.0002257	0.00019985	0.00022092	0.00014762	0.00017967	0.00013346	1	0.00021549	0.000153583	0.712717	-0.488599	3	3
DNA-directed RNA polymerase subunit beta	G5B5_05220	Information storage and processing	Transcription	K03043,K13797	K	168 kDa	0.0017243	0.0033626	0.0032507	0.0038086	0.0026379	0.0028369	0	0.0027792	0.00309447	1.11344	0.155021	3	3
DNA-directed RNA polymerase subunit beta'	G5B5_05215	Information storage and processing	Transcription	K03046	K	156 kDa	0.0016918	0.0035781	0.0031781	0.0039489	0.0028037	0.0031909	0	0.002816	0.0033145	1.17702	0.235144	3	3
dTDP-3-amino-3,4,6-trideoxy-alpha-D-glucose transaminase	G5B5_04380	Metabolism	Amino acid transport and metabolism	-	E	42 kDa	0.00063034	0.00052327	0.00071615	0.00058897	0.00056003	0.00047923	0	0.000623253	0.000542743	0.870823	-0.199549	3	3
dTDP-4-dehydrorhamnose 3,5-epimerase	G5B5_10920	Cellular processing and signaling	Cell wall/membrane/envelope biogenesis	K01790	M	21 kDa	0.0031626	0.0030303	0.0030032	0.0027786	0.0026303	0.0030704	0	0.00306537	0.00282643	0.922054	-0.117077	3	3
hypothetical protein	G5B5_09930	Cellular processing and signaling	Post-translational modification, protein turnover, and chaperones	-	O	36 kDa	0.00081003	0.0007809	0.001119	0.00058596	0.00072804	0.00061806	1	0.00090331	0.00064402	0.712956	-0.488116	3	3
dTDP-4-oxo-6-deoxy-D-allose reductase	G5B5_10885	unclassified	unclassified	-	G, M	37 kDa	0.00016159	0.00023847	0.00023066	0.00025164	0.00018759	6.3702e-05	0	0.00021024	0.000167644	0.797393	-0.326636	3	3
dTDP-glucose 4,6-dehydratase	G5B5_10915	Cellular processing and signaling	Cell wall/membrane/envelope biogenesis	K01710	M	40 kDa	0.0017703	0.00188	0.0019611	0.0016988	0.0016902	0.001839	0	0.00187047	0.00174267	0.931675	-0.102102	3	3
dTDP-glucose 4,6-dehydratase	G5B5_15900	Cellular processing and signaling	Cell wall/membrane/envelope biogenesis	K01710,K01784	M	38 kDa		5.6172e-05	9.3141e-05	0.00011855	0.000101	6.0019e-05	0	7.46565e-05	9.31897e-05	1.24825	0.319902	2	3
Carboxymethylenebutenolidase	G5B5_16705	Metabolism	Secondary metabolites biosynthesis, transport, and catabolism	K01061	Q	27 kDa	0.0051333	0.004232	0.0052845	0.0034402	0.0031	0.0039356	1	0.00488327	0.00349193	0.715081	-0.483821	3	3
D-threo-aldose 1-dehydrogenase	G5B5_06495	Metabolism	Energy production and conversion	K00064	C	34 kDa				7.9388e-05	5.6364e-05	6.699e-05	0		6.75807e-05	on Mn		0	3
ECF RNA polymerase sigma factor SigK	G5B5_15320	Information storage and processing	Transcription	K03088	K	21 kDa	0.00023227	0.00025709	0.00039786	0.00039064	0.00046225	0.00027469	0	0.00029574	0.00037586	1.27091	0.345866	3	3
Electron transport complex subunit RsxB	G5B5_08005	Metabolism	Energy production and conversion	K00184	C	115 kDa	0.00068047	0.00097362	0.00088335	0.0010623	0.00073492	0.00051034	0	0.000845813	0.000769187	0.909405	-0.137006	3	3
Elongation factor 4	G5B5_05680	Information storage and processing	Translation, ribosomal structure and biogenesis	K02519	J	106 kDa	9.4683e-05	0.00017149	9.4785e-05	0.00012868	0.00011135	0.00012216	0	0.000120319	0.00012073	1.00341	0.00491574	3	3
Elongation factor G	G5B5_11140	Information storage and processing	Translation, ribosomal structure and biogenesis	K02355	J	75 kDa	0.0013517	0.0013822	0.0012601	0.0015517	0.0014219	0.001355	0	0.00133133	0.00144287	1.08378	0.116066	3	3
Elongation factor P	G5B5_00445	Information storage and processing	Translation, ribosomal structure and biogenesis	K02356	J	21 kDa	0.00032177	0.00025439	0.0003937	0.00030065	0.00027444	0.00027182	0	0.000323287	0.000282303	0.873229	-0.195568	3	3
Elongation factor P	G5B5_11670	Information storage and processing	Translation, ribosomal structure and biogenesis	K02356	J	21 kDa	0.0025489	0.0019854	0.0019059	0.002117	0.0016909	0.0021213	0	0.00214673	0.0019764	0.920655	-0.119268	3	3
Methionine synthase	G5B5_02470	Metabolism	Amino acid transport and metabolism	K00548	E	40 kDa			5.8862e-05	4.4951e-05		5.6895e-05	0	5.8862e-05	5.0923e-05	0.865125	-0.209019	1	2
hypothetical protein	G5B5_14610	Poorly characterized	Function unknown	-	S	17 kDa			0.000131	0.00010004		0.00012663	0	0.000131	0.000113335	0.865153	-0.208973	1	2
Elongation factor Ts	G5B5_06925	Information storage and processing	Translation, ribosomal structure and biogenesis	K02357	J	24 kDa	0.00083806	0.00092761	0.0006836	0.0010441	0.00083393	0.00099114	0	0.000816423	0.00095639	1.17144	0.228282	3	3
Elongation factor Tu 2	G5B5_05325 (+1)	unclassified	unclassified	-	-	43 kDa	0.0078017	0.0097424	0.011041	0.01109	0.0087365	0.012145	0	0.00952837	0.0106572	1.11847	0.161523	3	3
endonuclease 4	G5B5_09170	Metabolism	Carbohydrate transport and metabolism	-	G	32 kDa	0.00041951	0.0004975	0.00076993	0.00044797	0.00065598	0.0004607	0	0.000562313	0.00052155	0.927508	-0.108569	3	3
Enolase	G5B5_02150	Metabolism	Carbohydrate transport and metabolism	K01689	G	53 kDa	0.0039842	0.0037714	0.0044999	0.0039249	0.0035699	0.0041789	0	0.00408517	0.00389123	0.952527	-0.0701674	3	3
Enoyl-[acyl-carrier-protein] reductase [NADH] FabI	G5B5_15165	Metabolism	Lipid transport and metabolism	K00208	I	27 kDa	0.00057851	0.00048966	0.00066619	0.00054054	0.00067724	0.0009659	0	0.00057812	0.000727893	1.25907	0.332358	3	3
Epoxide hydrolase A	G5B5_14475	Poorly characterized	Function unknown	-	S	37 kDa				4.8398e-05		6.1259e-05	0		5.48285e-05			0	2
Farnesyl diphosphate synthase	G5B5_05040	Metabolism	Coenzyme transport and metabolism	K00795,K13789	H	33 kDa	8.3352e-05	9.2258e-05	0.00010198	0.00010384	8.2941e-05	9.8576e-05	0	9.253e-05	9.5119e-05	1.02798	0.0398124	3	3
3-isopropylmalate dehydrogenase	G5B5_04765	Metabolism	Amino acid transport and metabolism	K00052,K01704,K17750	E	39 kDa	0.0020334	0.001933	0.0021075	0.0011847	0.0016902	0.0014712	1	0.00202463	0.0014487	0.715537	-0.482902	3	3
Ferrochelatase	G5B5_06250	Metabolism	Coenzyme transport and metabolism	K01772	H	40 kDa	0.00023413	0.00028506	0.0003724	0.00026251	0.00030286	0.00035996	0	0.000297197	0.000308443	1.03784	0.0535875	3	3
Putative heme-dependent peroxidase	G5B5_15855	Poorly characterized	Function unknown	K09162	S	29 kDa	0.0012542	0.0015759	0.0017005	0.0011086	0.0011806	0.00096217	1	0.0015102	0.00108379	0.717647	-0.478654	3	3
Flavodoxin FldP	G5B5_08450	Poorly characterized	Function unknown	K03809	S	20 kDa	0.00045728	0.00050614	0.0005595	0.00034181	0.00040952	0.00059488	0	0.00050764	0.000448737	0.883966	-0.177937	3	3
FMN-dependent NADH-azoreductase	G5B5_08630	Metabolism	Lipid transport and metabolism	K01118	I	22 kDa	0.00016884	0.00018688	0.00015494	0.00015776	0.00016801	0.00019968	0	0.00017022	0.00017515	1.02896	0.0411904	3	3
Folylpolyglutamate synthase	G5B5_09030	Metabolism	Coenzyme transport and metabolism	K11754	H	41 kDa	0.00048392	0.00079069	0.00053571	0.00060288	0.00055033	0.00057231	0	0.00060344	0.000575173	0.953157	-0.0692135	3	3
3-deoxy-D-manno-octulosonate 8-phosphate phosphatase KdsC	G5B5_11895	Poorly characterized	Function unknown	K03270	S	21 kDa	0.0002674	0.00029597	0.00032718	0.00020821	0.00022174	0.00021083	1	0.00029685	0.000213593	0.719533	-0.474867	3	3
Fructose-1,6-bisphosphatase class 1	G5B5_03255	Metabolism	Carbohydrate transport and metabolism	K03841	G	33 kDa	0.0015137	0.0018278	0.0017174	0.0012601	0.0016432	0.001302	0	0.0016863	0.00140177	0.831268	-0.266615	3	3
hypothetical protein	G5B5_06985	Poorly characterized	Function unknown	K09137	S	12 kDa	0.00036889				0.00029366	0.00034902	0	0.00036889	0.00032134	0.8711	-0.19909	1	2
hypothetical protein	G5B5_05835	Metabolism	Carbohydrate transport and metabolism	K01051	G	38 kDa		5.585e-05		4.7146e-05	5.0209e-05		0	5.585e-05	4.86775e-05	0.871576	-0.198302	1	2
hypothetical protein	G5B5_13195	Poorly characterized	Function unknown	K00937	S	37 kDa		5.8896e-05		4.9718e-05	5.2948e-05		0	5.8896e-05	5.1333e-05	0.871587	-0.198283	1	2
hypothetical protein	G5B5_08300	Cellular processing and signaling	Cell wall/membrane/envelope biogenesis	K08307	M	66 kDa		3.2501e-05		2.7436e-05	2.9219e-05		0	3.2501e-05	2.83275e-05	0.871589	-0.198281	1	2
hypothetical protein	G5B5_11665	unclassified	unclassified	-	-	31 kDa		6.7251e-05		5.6771e-05	6.046e-05		0	6.7251e-05	5.86155e-05	0.871593	-0.198274	1	2
Fumarate hydratase class I, aerobic	G5B5_11730	Metabolism	Energy production and conversion	K01676,K01678	C	56 kDa	0.0013272	0.0012618	0.0015197	0.0008585	0.000982	0.0012677	0	0.00136957	0.00103607	0.756492	-0.402603	3	3
3-oxoacyl-[acyl-carrier-protein] reductase FabG	G5B5_02320	Cellular processing and signaling	Cell wall/membrane/envelope biogenesis	K00038,K00059,K10780	M	27 kDa	0.00073456	0.00085176	0.00094156	0.00049025	0.00062652	0.00070326	1	0.000842627	0.000606677	0.719983	-0.473966	3	3
Fumarate reductase iron-sulfur subunit	G5B5_02875	Metabolism	Energy production and conversion	K00240,K00245	C	27 kDa	0.00065675	0.00065041	0.00080356	0.00096891	0.00058472	0.00061319	0	0.000703573	0.000722273	1.02658	0.0378441	3	3
hypothetical protein	G5B5_07855	Poorly characterized	Function unknown	-	S	14 kDa	0.00014276	0.00031603		0.00020008			0	0.000229395	0.00020008	0.872207	-0.197257	2	1
Fumonisin B1 esterase	G5B5_06370	Metabolism	Lipid transport and metabolism	K03929	I	57 kDa	3.3574e-05	9.2905e-05		7.8427e-05	5.0113e-05	5.956e-05	0	6.32395e-05	6.27e-05	0.991469	-0.0123605	2	3
Galactokinase	G5B5_13040	Metabolism	Carbohydrate transport and metabolism	K00849	G	42 kDa				6.2782e-05		5.2976e-05	0		5.7879e-05			0	2
Galactose-1-phosphate uridylyltransferase	G5B5_13035	Metabolism	Carbohydrate transport and metabolism	K00965	G	39 kDa	0.00030275	0.00025132	0.00033956	0.00028288	0.00027615	0.0002387	0	0.000297877	0.00026591	0.892685	-0.163777	3	3
Gamma-glutamyl phosphate reductase	G5B5_07585	Metabolism	Amino acid transport and metabolism	K00147	E	50 kDa	5.6765e-05	8.3774e-05	6.9455e-05	7.072e-05	5.6486e-05	4.4756e-05	0	6.9998e-05	5.73207e-05	0.81889	-0.288258	3	3
GDP-4-keto-6-deoxy-D-mannose 3-dehydratase	G5B5_10895	Cellular processing and signaling	Cell wall/membrane/envelope biogenesis	K12452,K13328	M	50 kDa	0.00013567	0.00019307	0.000166	0.0001992	0.00017357	0.00016045	0	0.000164913	0.00017774	1.07778	0.10806	3	3
Glucitol operon repressor	G5B5_12745	Information storage and processing	Transcription	K02081,K03436	K	29 kDa		0.0003351	0.00024695	0.00028288	0.00020084	0.00019892	0	0.000291025	0.000227547	0.78188	-0.354981	2	3
Glucitol operon repressor	G5B5_12720	Information storage and processing	Transcription	K02081,K03436	K	28 kDa		0.00011213	0.00012395	9.4655e-05	0.00023521		0	0.00011804	0.000164932	1.39726	0.4826	2	2
Glucitol operon repressor	G5B5_06475	Information storage and processing	Transcription	K02081	K	27 kDa				6.485e-05	6.9063e-05		0		6.69565e-05			0	2
Glucoamylase	G5B5_07155	Metabolism	Carbohydrate transport and metabolism	K01178	G	92 kDa	0.00010642	9.4233e-05	0.00010417	0.00013921	0.00013767	3.7758e-05	0	0.000101608	0.000104879	1.0322	0.0457212	3	3
Glucokinase	G5B5_10545	Metabolism	Carbohydrate transport and metabolism	K00845	G	37 kDa	0.00051194	0.00065163	0.0005011	0.00035875	0.00053488	0.00036327	0	0.00055489	0.000418967	0.755045	-0.405366	3	3
hypothetical protein	G5B5_04575	Poorly characterized	Function unknown	-	S	36 kDa	0.00035336	0.00042121	0.00043235	0.00027938	0.00027048	0.00032147	1	0.000402307	0.000290443	0.721945	-0.470039	3	3
Gluconeogenesis factor	G5B5_04270	Poorly characterized	Function unknown	-	S	37 kDa	0.00017762	0.00022469	0.00015524	0.00018968	7.575e-05	0.00018006	0	0.00018585	0.000148497	0.799014	-0.323708	3	3
putative dimethyl sulfoxide reductase chain YnfF	G5B5_07915	Metabolism	Energy production and conversion	-	C	77 kDa	0.00029678	0.00027374	0.00037825	0.00021953	0.00023379	0.00023399	1	0.000316257	0.000229103	0.724422	-0.465097	3	3
Glucose 1-dehydrogenase 1	G5B5_05320	Poorly characterized	Function unknown	-	S	26 kDa	0.00054196	0.00047989	0.00070731	0.00057391	0.00035952	0.00047003	0	0.000576387	0.00046782	0.811643	-0.301083	3	3
Glucose 1-dehydrogenase 2	G5B5_07120	Metabolism	Lipid transport and metabolism	K00059	I	25 kDa	0.00045838	0.00027319	0.00073341	0.00026357	0.00038595	0.0002085	0	0.000488327	0.000286007	0.585687	-0.771798	3	3
Glucose 1-dehydrogenase 2	G5B5_03325	Metabolism	Lipid transport and metabolism	K00059	I	25 kDa	7.0804e-05		0.00012995		0.00010568	8.3737e-05	0	0.000100377	9.47085e-05	0.943528	-0.0838629	2	2
Glucose-1-phosphate adenylyltransferase	G5B5_13325	Metabolism	Carbohydrate transport and metabolism	K00975	G	46 kDa	0.00075978	0.00084097	0.00054228	0.0005916	0.00052503	0.00079872	0	0.000714343	0.00063845	0.893758	-0.162044	3	3
Glucose-1-phosphate cytidylyltransferase	G5B5_10905	Cellular processing and signaling	Cell wall/membrane/envelope biogenesis	K00978	M	29 kDa	0.00058076	0.000605	0.00079418	0.00051072	0.00061189	0.00072724	0	0.00065998	0.000616617	0.934296	-0.0980484	3	3
Glucose-1-phosphate thymidylyltransferase 1	G5B5_10910	Cellular processing and signaling	Cell wall/membrane/envelope biogenesis	K00973	M	32 kDa	0.00099564	0.00080147	0.00095979	0.0012686	0.00093069	0.0013916	0	0.000918967	0.00119696	1.30251	0.381295	3	3
hypothetical protein	G5B5_09440	unclassified	unclassified	-	-	18 kDa	0.00010642	0.00017669		9.9436e-05	0.0001059		1	0.000141555	0.000102668	0.725287	-0.463376	2	2
Glucose-6-phosphate 1-dehydrogenase 2	G5B5_10535	Metabolism	Carbohydrate transport and metabolism	K00036	G	57 kDa	0.006291	0.0073458	0.006936	0.0061203	0.0055721	0.0067247	0	0.0068576	0.00613903	0.895216	-0.159692	3	3
Glucose-6-phosphate isomerase	G5B5_02765	Metabolism	Carbohydrate transport and metabolism	K01810	G	60 kDa	0.0041478	0.004055	0.0045418	0.0034985	0.0045128	0.0034548	0	0.0042482	0.00382203	0.899683	-0.152511	3	3
Oligopeptidase A	G5B5_11815	Metabolism	Amino acid transport and metabolism	K01284,K01392	E	80 kDa	0.0018003	0.0016788	0.0016596	0.0012674	0.0013497	0.0011229	1	0.0017129	0.00124667	0.727811	-0.458365	3	3
Glutamate racemase	G5B5_15175	Cellular processing and signaling	Cell wall/membrane/envelope biogenesis	K01776,K02428	M	29 kDa	0.00035769	0.00039591	0.00039786	0.00039498	0.00035593	0.0002692	0	0.00038382	0.000340037	0.885927	-0.17474	3	3
Flavin prenyltransferase UbiX	G5B5_03050	Metabolism	Coenzyme transport and metabolism	K03186	H	22 kDa	0.00020805		0.00020365	0.00015552		0.00014763	1	0.00020585	0.000151575	0.736337	-0.441562	2	2
UDP-N-acetyl-D-glucosamine 6-dehydrogenase	G5B5_09845	Cellular processing and signaling	Cell wall/membrane/envelope biogenesis	K02472,K13015	M	49 kDa	0.00015269	0.00012675	0.00011676	0.000107	9.4961e-05	9.029e-05	1	0.000132067	9.7417e-05	0.737635	-0.439021	3	3
Glutamate-1-semialdehyde 2,1-aminomutase	G5B5_10470	Metabolism	Coenzyme transport and metabolism	K01845	H	46 kDa	0.00062139	0.00068779	0.00073577	0.00056188	0.00049866	0.00064007	0	0.00068165	0.00056687	0.831614	-0.266013	3	3
Glutamate--tRNA ligase	G5B5_03340	Information storage and processing	Translation, ribosomal structure and biogenesis	K01885,K09698	J	57 kDa	0.00060849	0.00073124	0.0010849	0.00069851	0.0007785	0.00096637	0	0.00080821	0.00081446	1.00773	0.0111136	3	3
Glutamine synthetase	G5B5_02925	Metabolism	Amino acid transport and metabolism	K01915	E	54 kDa	0.00094068	0.00089829	0.00099299	0.00091341	0.00086263	0.0011998	0	0.000943987	0.000991947	1.05081	0.0714961	3	3
hypothetical protein	G5B5_05020	Poorly characterized	Function unknown	-	S	37 kDa	0.00057486	0.00060736	0.00076731	0.00043947	0.00057203	0.00043264	1	0.000649843	0.00048138	0.740763	-0.432916	3	3
hypothetical protein	G5B5_12295	unclassified	unclassified	-	-	24 kDa	0.00012194	0.00013497		0.00011394			0	0.000128455	0.00011394	0.887003	-0.172989	2	1
putative xylitol oxidase	G5B5_08335	Metabolism	Energy production and conversion	K00594	C	52 kDa	0.00012993	0.00016436	0.00013627	0.0001214	0.00011082	8.7809e-05	1	0.00014352	0.000106676	0.743285	-0.428012	3	3
Glutamine--fructose-6-phosphate aminotransferase [isomerizing]	G5B5_12165	Cellular processing and signaling	Cell wall/membrane/envelope biogenesis	K00820	M	70 kDa	8.0302e-05	0.00014814	0.00011463	0.00017507	0.0001465	0.00014245	0	0.000114357	0.000154673	1.35254	0.435676	3	3
Succinyl-diaminopimelate desuccinylase	G5B5_02455	Metabolism	Amino acid transport and metabolism	K13049	E	52 kDa	0.00016635	0.00016367	0.00020354	0.00015543	0.00011036	0.00013116	1	0.000177853	0.000132317	0.743965	-0.426693	3	3
Glutamyl-tRNA(Gln) amidotransferase subunit A	G5B5_11475	Information storage and processing	Translation, ribosomal structure and biogenesis	K01457,K02433	J	51 kDa	0.00041043	0.00047404	0.00063318	0.00041684	0.00053271	0.0004854	0	0.000505883	0.000478317	0.945508	-0.0808386	3	3
Glutathione-independent formaldehyde dehydrogenase	G5B5_15040	Metabolism	Energy production and conversion	K00148,K18369	C	41 kDa				0.00023378	0.0001358	0.000269	0		0.00021286	on Mn		0	3
Glyceraldehyde-3-phosphate dehydrogenase 1	G5B5_02225	Metabolism	Carbohydrate transport and metabolism	K00134	G	36 kDa	0.0078334	0.0075648	0.0095201	0.0079087	0.009495	0.0048497	0	0.0083061	0.0074178	0.893055	-0.16318	3	3
putative adenylyltransferase/sulfurtransferase MoeZ	G5B5_05450	unclassified	unclassified	K03148,K11996	H, P	43 kDa	4.325e-05	7.1807e-05				5.115e-05	0	5.75285e-05	5.115e-05	0.889125	-0.169543	2	1
Glycerol kinase	G5B5_09640	Metabolism	Energy production and conversion	K00864	C	54 kDa	5.2468e-05	7.7433e-05	6.4197e-05	4.9025e-05	6.9613e-05	6.2052e-05	0	6.46993e-05	6.023e-05	0.930921	-0.103269	3	3
Deoxyguanosinetriphosphate triphosphohydrolase-like protein	G5B5_00235	Metabolism	Nucleotide transport and metabolism	K01129	F	44 kDa			5.5089e-05		4.4802e-05	5.3248e-05	0	5.5089e-05	4.9025e-05	0.889924	-0.168247	1	2
Glycerol-3-phosphate dehydrogenase [NAD(P)+]	G5B5_05925	Metabolism	Energy production and conversion	K00057	C	35 kDa	7.839e-05	5.7844e-05	9.5913e-05	7.3245e-05	7.8004e-05	9.2709e-05	0	7.73823e-05	8.13193e-05	1.05088	0.0715942	3	3
Glycine cleavage system H protein	G5B5_13165	Metabolism	Amino acid transport and metabolism	K02437	E	18 kDa	0.0059236	0.0078445	0.0049182	0.0053866	0.0076312	0.0048164	0	0.00622877	0.00594473	0.9544	-0.0673344	3	3
Glycine oxidase	G5B5_15110	Metabolism	Energy production and conversion	K03153	C	35 kDa	0.00010642	0.00014724	0.00016276	7.4577e-05	0.00013237	9.4394e-05	0	0.000138807	0.000100447	0.723647	-0.466642	3	3
Glycine--tRNA ligase alpha subunit	G5B5_13680	Information storage and processing	Translation, ribosomal structure and biogenesis	K01878	J	37 kDa	0.00026605	0.00032393	0.00022787	0.0001243	0.00018532	0.00031465	0	0.000272617	0.00020809	0.763306	-0.389666	3	3
Glycine--tRNA ligase beta subunit	G5B5_13685	Information storage and processing	Translation, ribosomal structure and biogenesis	K01879	J	78 kDa	0.00011256	0.00022149	0.00015302	0.00017529	0.00018668	0.00014791	0	0.000162357	0.00016996	1.04683	0.0660286	3	3
Glycogen phosphorylase	G5B5_15610	Metabolism	Carbohydrate transport and metabolism	K00688	G	94 kDa		4.6165e-05	2.5516e-05	2.9229e-05	3.1128e-05		0	3.58405e-05	3.01785e-05	0.842022	-0.24807	2	2
2-dehydropantoate 2-reductase	G5B5_10100	Metabolism	Coenzyme transport and metabolism	K00077	H	33 kDa	0.00056643	0.00050156	0.00048514	0.00037048	0.00045091	0.00033495	1	0.00051771	0.000385447	0.744522	-0.425613	3	3
Glyoxal reductase	G5B5_00890	Metabolism	Energy production and conversion	K06221	C	34 kDa	0.00056461	0.00043746	0.00089807	0.00055393	0.00053374	0.00050081	0	0.00063338	0.000529493	0.835981	-0.258459	3	3
hypothetical protein	G5B5_00405	unclassified	unclassified	-	-	19 kDa	0.0007839	0.00075197	0.00083125	0.00063479	0.00057203	0.00055625	1	0.00078904	0.00058769	0.744816	-0.425043	3	3
hypothetical protein	G5B5_16415	Cellular processing and signaling	Post-translational modification, protein turnover, and chaperones	-	O	35 kDa	0.0024824	0.0024584	0.0024618	0.0018311	0.0020541	0.0016379	1	0.00246753	0.00184103	0.746103	-0.422554	3	3
GTP cyclohydrolase-2	G5B5_02160	Metabolism	Coenzyme transport and metabolism	K01497,K14652	H	25 kDa	0.00035119	0.0004319	0.00057292	0.00032814	0.00042712	0.00050763	0	0.000452003	0.000420963	0.931328	-0.102639	3	3
GTPase Era	G5B5_03825	Poorly characterized	Function unknown	K03595	S	42 kDa	0.00014048	0.00025914	0.00017188	0.00013126	0.00023297	0.00013844	0	0.0001905	0.000167557	0.879563	-0.185142	3	3
GTPase HflX	G5B5_04370	Poorly characterized	Function unknown	K03665	S	53 kDa	3.6355e-05	6.0359e-05		5.0953e-05	7.2352e-05	4.2995e-05	0	4.8357e-05	5.54333e-05	1.14634	0.197029	2	3
GTP-binding protein TypA/BipA	G5B5_07180	Cellular processing and signaling	Signal transduction mechanisms	K06207	T	67 kDa	0.00031716	0.00039893	0.00038806	0.00044452	0.00034429	0.00032395	0	0.00036805	0.00037092	1.0078	0.0112063	3	3
Guanine deaminase	G5B5_05470	unclassified	unclassified	K01487	F, J	17 kDa	0.0001667	0.00018452					0	0.00017561				2	0
Guanylate kinase	G5B5_13735	Metabolism	Nucleotide transport and metabolism	K00942	F	25 kDa	0.00011864	0.00013132	0.00014517	0.00014781	0.00019677	0.00014032	0	0.00013171	0.000161633	1.22719	0.29536	3	3
Haloalkane dehalogenase	G5B5_08395	Poorly characterized	Function unknown	-	S	52 kDa	0.00027437	0.00024295	0.0003357	0.00025636	0.00029122	0.00032448	0	0.00028434	0.000290687	1.02232	0.0318478	3	3
Thermostable beta-glucosidase B	G5B5_00525	Metabolism	Carbohydrate transport and metabolism	K05349	G	80 kDa	2.389e-05	2.6443e-05	2.9231e-05		2.3773e-05		0	2.65213e-05	2.3773e-05	0.896373	-0.157829	3	1
Hercynine oxygenase	G5B5_11940	Poorly characterized	Function unknown	K18912	S	53 kDa	0.00029825	0.00022696	0.0003193	0.00031351	0.00040807	0.00044091	0	0.000281503	0.000387497	1.37653	0.461032	3	3
Hexitol phosphatase A	G5B5_02560	Poorly characterized	Function unknown	K19270	S	24 kDa	0.000437	0.00048369	0.00068051	0.00051968	0.00067203	0.00065777	0	0.000533733	0.000616493	1.15506	0.207966	3	3
Histidine--tRNA ligase	G5B5_07745	Information storage and processing	Translation, ribosomal structure and biogenesis	K01892	J	58 kDa	6.6893e-05	0.00014808		9.3754e-05	3.3282e-05		0	0.000107487	6.3518e-05	0.590939	-0.758918	2	2
Histidinol dehydrogenase	G5B5_11425	Metabolism	Amino acid transport and metabolism	K00013,K15509	E	45 kDa	0.00039343	0.00045839	0.00040537	0.00042565	0.00074177	0.00061223	0	0.000419063	0.000593217	1.41558	0.501391	3	3
Histidinol-phosphate aminotransferase	G5B5_01950	Information storage and processing	Transcription	-	K	37 kDa	0.00017312	0.00021899	0.00021182	0.00016176	0.00019688	8.7747e-05	0	0.00020131	0.000148796	0.739137	-0.436086	3	3
Histidinol-phosphate aminotransferase	G5B5_11420	Metabolism	Amino acid transport and metabolism	K00817	E	44 kDa	0.00021894	0.00031504	0.00029468	0.00028641	0.0003268	0.00028483	0	0.00027622	0.000299347	1.08373	0.115999	3	3
hypothetical protein	G5B5_03810	unclassified	unclassified	-	-	17 kDa		0.00012621			0.00011346		0	0.00012621	0.00011346	0.898978	-0.153642	1	1
hypothetical protein	G5B5_05660	Metabolism	Amino acid transport and metabolism	-	E	90 kDa		3.4998e-05			3.1464e-05		0	3.4998e-05	3.1464e-05	0.899023	-0.15357	1	1
Thiol-disulfide oxidoreductase ResA	G5B5_15300	Cellular processing and signaling	Post-translational modification, protein turnover, and chaperones	-	O	22 kDa	0.00013039			0.00016244	8.65e-05	0.00010281	0	0.00013039	0.00011725	0.899225	-0.153245	1	3
Holliday junction ATP-dependent DNA helicase RuvB	G5B5_02130	Information storage and processing	Replication, recombination and repair	K02343	L	71 kDa	2.6686e-05	4.4306e-05					0	3.5496e-05				2	0
Homoserine O-acetyltransferase	G5B5_16600	Metabolism	Amino acid transport and metabolism	K00641	E	41 kDa	0.00031185	0.00023896	0.0002348	0.00026897	0.00028644	0.0002837	0	0.00026187	0.000279703	1.0681	0.0950467	3	3
HTH-type transcriptional regulator CysL	G5B5_02265	Information storage and processing	Transcription	-	K	34 kDa	8.4692e-05	0.00012499		7.9133e-05	5.6183e-05	6.6774e-05	0	0.000104841	6.73633e-05	0.642529	-0.638168	2	3
Serine hydroxymethyltransferase	G5B5_08715	Metabolism	Amino acid transport and metabolism	K00600	E	48 kDa	0.0023638	0.0023085	0.0019929	0.0016704	0.0016406	0.0016914	1	0.00222173	0.00166747	0.750525	-0.414028	3	3
HTH-type transcriptional repressor ComR	G5B5_07840	Information storage and processing	Transcription	K16137	K	22 kDa		9.4348e-05	0.00010429	0.00011947	8.482e-05	0.00010081	0	9.9319e-05	0.0001017	1.02397	0.034178	2	3
Hydrogenase-1 large chain	G5B5_15470	Metabolism	Energy production and conversion	K00437,K05922,K06281	C	63 kDa	0.00013838	0.00011913	9.4066e-05	0.00024424	0.0002142	5.4554e-05	0	0.000117192	0.000170998	1.45913	0.545105	3	3
hypothetical protein	G5B5_15185	Cellular processing and signaling	Cell wall/membrane/envelope biogenesis	K01448	M	31 kDa	0.00011785	0.00016305	0.00018024	0.00011011	8.7951e-05		0	0.000153713	9.90305e-05	0.644254	-0.634297	3	2
3-oxoacyl-[acyl-carrier-protein] synthase 2	G5B5_07820	Metabolism	Lipid transport and metabolism	K09458	I	44 kDa	0.0010611	0.0012205	0.00096732	0.00079702	0.00068318	0.0009596	1	0.00108297	0.000813267	0.750957	-0.413197	3	3
Thiol:disulfide interchange protein DsbD	G5B5_00585	Cellular processing and signaling	Post-translational modification, protein turnover, and chaperones	K06888	O	77 kDa	0.00062977	0.00077907	0.00057413	0.00049613	0.00054065	0.00045272	1	0.00066099	0.0004965	0.751146	-0.412835	3	3
hypothetical protein	G5B5_05735	Cellular processing and signaling	Intracellular trafficking, secretion, and vesicular transport	K02283,K02454,K02652,K12276	U	62 kDa	4.8329e-05	8.9154e-05	9.8553e-05	4.5157e-05	8.0151e-05	5.7156e-05	0	7.86787e-05	6.08213e-05	0.773035	-0.371395	3	3
4-deoxy-L-threo-5-hexosulose-uronate ketol-isomerase	G5B5_03720	Metabolism	Carbohydrate transport and metabolism	K01815	G	31 kDa	0.0038214	0.0037054	0.0042119	0.003305	0.0033312	0.002241	1	0.0039129	0.00295907	0.756234	-0.403096	3	3
hypothetical protein	G5B5_13395	Cellular processing and signaling	Intracellular trafficking, secretion, and vesicular transport	K02453	U	90 kDa	8.2053e-05	0.00012488	8.7846e-05	6.7084e-05	9.1855e-05		0	9.82597e-05	7.94695e-05	0.80877	-0.306198	3	2
hypothetical protein	G5B5_11500	Cellular processing and signaling	Cell wall/membrane/envelope biogenesis	-	M	59 kDa	0.00011215	0.00019507	0.00017642	0.00013473	0.00012754		0	0.000161213	0.000131135	0.813425	-0.297918	3	2
hypothetical protein	G5B5_02900	Cellular processing and signaling	Post-translational modification, protein turnover, and chaperones	K01802,K03767,K03768	O	28 kDa	0.00036171	0.00043676	0.00056327	0.00049159	0.00039265	0.00027222	0	0.000453913	0.000385487	0.849252	-0.235736	3	3
hypothetical protein	G5B5_11450	Cellular processing and signaling	Post-translational modification, protein turnover, and chaperones	-	O	22 kDa	0.0011256	0.0010964	0.0010467	0.00084138	0.00094085	0.0011715	0	0.00108957	0.000984577	0.903641	-0.146179	3	3
hypothetical protein	G5B5_08590	Cellular processing and signaling	Cell wall/membrane/envelope biogenesis	-	-	25 kDa	0.00014393	0.00019914	0.00022013	0.00020172	0.00010742	0.00021277	0	0.000187733	0.00017397	0.926687	-0.109846	3	3
hypothetical protein	G5B5_05685	Cellular processing and signaling	Post-translational modification, protein turnover, and chaperones	K08677	O	52 kDa	0.00073723	0.000612	0.00073802	0.00062622	0.0006669	0.00067373	0	0.00069575	0.000655617	0.942316	-0.0857165	3	3
hypothetical protein	G5B5_02290	Cellular processing and signaling	Cell wall/membrane/envelope biogenesis	K17836	M	38 kDa	0.00029429	0.00032574	0.00027006	0.00029789	0.00029284	0.00026103	0	0.000296697	0.00028392	0.956937	-0.0635042	3	3
hypothetical protein	G5B5_03855	Cellular processing and signaling	Post-translational modification, protein turnover, and chaperones	K07397	O	14 kDa	0.0023587	0.0026108	0.0016033	0.0024488	0.0016951	0.0022471	0	0.00219093	0.00213033	0.972341	-0.0404664	3	3
hypothetical protein	G5B5_10160	Cellular processing and signaling	Cell wall/membrane/envelope biogenesis	-	M	56 kDa	0.0001013	7.4752e-05	0.00010329	0.00011043	8.4004e-05	7.9872e-05	0	9.3114e-05	9.14353e-05	0.981972	-0.0262463	3	3
hypothetical protein	G5B5_05730	Cellular processing and signaling	Intracellular trafficking, secretion, and vesicular transport	K02662	U	34 kDa	0.00013466	8.9428e-05	0.00013181	0.00012582	0.00013399	9.5553e-05	0	0.000118633	0.000118454	0.998497	-0.00217035	3	3
hypothetical protein	G5B5_15445	Cellular processing and signaling	Signal transduction mechanisms	-	T	34 kDa	0.00044737	0.00040233	0.00034211	0.00036576	0.0003617	0.00046295	0	0.00039727	0.000396803	0.998825	-0.00169571	3	3
hypothetical protein	G5B5_13045	Cellular processing and signaling	Cell wall/membrane/envelope biogenesis	K15725	M	49 kDa	3.8848e-05	4.2999e-05		3.6299e-05		4.5944e-05	0	4.09235e-05	4.11215e-05	1.00484	0.00696335	2	2
hypothetical protein	G5B5_02635	Cellular processing and signaling	Cell wall/membrane/envelope biogenesis	-	M	35 kDa	0.0047963	0.004289	0.0051059	0.0049626	0.0043143	0.0050314	0	0.0047304	0.00476943	1.00825	0.0118557	3	3
hypothetical protein	G5B5_02220	Cellular processing and signaling	Signal transduction mechanisms	-	T	31 kDa	0.00018949	0.00024469	0.00023185	0.00023607	0.00021998	0.0002241	0	0.00022201	0.000226717	1.0212	0.0302658	3	3
hypothetical protein	G5B5_04480	Cellular processing and signaling	Cell wall/membrane/envelope biogenesis	K03797	M	59 kDa	0.0001635	0.00023525	0.00018004	0.00019859	0.0002115	0.00021269	0	0.00019293	0.000207593	1.076	0.105683	3	3
hypothetical protein	G5B5_16755	Cellular processing and signaling	Cell wall/membrane/envelope biogenesis	-	M	48 kDa	5.9862e-05	4.4172e-05	4.8829e-05	5.5933e-05	3.9711e-05	7.0796e-05	0	5.09543e-05	5.548e-05	1.08882	0.122763	3	3
hypothetical protein	G5B5_03660	Cellular processing and signaling	Post-translational modification, protein turnover, and chaperones	K07263	O	95 kDa	0.0002067	0.00045757	0.00038537	0.00045984	0.00041136	0.00027937	0	0.00034988	0.000383523	1.09616	0.132454	3	3
hypothetical protein	G5B5_00565	Cellular processing and signaling	Post-translational modification, protein turnover, and chaperones	K04771,K08372	O	58 kDa	0.0006428	0.00083296	0.0010742	0.0010108	0.00078004	0.0010383	0	0.000849987	0.000943047	1.10948	0.149889	3	3
hypothetical protein	G5B5_08370	Cellular processing and signaling	Post-translational modification, protein turnover, and chaperones	K07263	O	102 kDa	9.3203e-05	0.00019601	0.00011404	0.00019159	0.00022258	5.5113e-05	0	0.000134418	0.000156428	1.16374	0.218773	3	3
hypothetical protein	G5B5_15570	Cellular processing and signaling	Signal transduction mechanisms	-	T	31 kDa	0.00015034	0.00023296	0.00011037	0.00022475	0.00017952	0.0001778	0	0.000164557	0.000194023	1.17907	0.237646	3	3
Gluconokinase	G5B5_13895	Metabolism	Carbohydrate transport and metabolism	K00851,K01057	G	18 kDa		0.00017996		0.00020255		0.00012819	0	0.00017996	0.00016537	0.918926	-0.121979	1	2
hypothetical protein	G5B5_07050	Cellular processing and signaling	Post-translational modification, protein turnover, and chaperones	K01802,K09068,K10598,K12737	O	43 kDa	8.5033e-05	0.00014118	0.00013005	0.00013904	0.00019038	0.00010057	0	0.000118754	0.00014333	1.20695	0.27136	3	3
hypothetical protein	G5B5_07070	Cellular processing and signaling	Post-translational modification, protein turnover, and chaperones	K08070,K08372	O	42 kDa	0.00013137	0.0001454	0.00021431	0.00016366	0.00019608	0.00023304	0	0.000163693	0.000197593	1.20709	0.271539	3	3
Dihydroorotate dehydrogenase	G5B5_13070	Poorly characterized	Function unknown	-	S	38 kDa	0.00069248	0.00065698	0.00066572	0.00046217	0.00056602	0.00049723	1	0.000671727	0.000508473	0.756965	-0.401702	3	3
hypothetical protein	G5B5_15480	Cellular processing and signaling	Post-translational modification, protein turnover, and chaperones	K04653	O	10 kDa	0.00018291	0.00020245	0.0003357	0.00042726	0.00027301	0.00021632	0	0.000240353	0.00030553	1.27117	0.346157	3	3
hypothetical protein	G5B5_07385	Cellular processing and signaling	Cell wall/membrane/envelope biogenesis	-	M	47 kDa	0.00019909	0.00013222	9.7436e-05	0.00020462	0.00017829	0.00016482	0	0.000142915	0.000182577	1.27752	0.353342	3	3
hypothetical protein	G5B5_10955	Cellular processing and signaling	Cell wall/membrane/envelope biogenesis	K01991	M	35 kDa	0.00010515	8.7286e-05	0.00016081	0.00017193	0.00015694	0.00012435	0	0.000117749	0.000151073	1.28302	0.359538	3	3
hypothetical protein	G5B5_14030	Cellular processing and signaling	Signal transduction mechanisms	-	T	32 kDa	0.00011864	0.00013132	0.00036292	0.00036029	0.00011806	0.00035079	0	0.000204293	0.00027638	1.35286	0.436011	3	3
hypothetical protein	G5B5_13780	Cellular processing and signaling	Cell wall/membrane/envelope biogenesis	-	M	95 kDa	1.9977e-05	5.5278e-05	2.4442e-05	5.5996e-05	8.9452e-05		0	3.32323e-05	7.2724e-05	2.18835	1.12984	3	2
Ribonuclease J1	G5B5_04035	Poorly characterized	Function unknown	K12574	S	61 kDa	0.0014606	0.0012828	0.0015346	0.0010681	0.00099529	0.0012017	1	0.001426	0.00108836	0.763228	-0.389814	3	3
hypothetical protein	G5B5_01790	Information storage and processing	Transcription	-	K	19 kDa	0.00015051	0.00016659	0.00018415	0.00018751	9.9845e-05	0.00011867	0	0.000167083	0.000135342	0.810025	-0.303962	3	3
putative glycine dehydrogenase (decarboxylating) subunit 2	G5B5_13150	Metabolism	Amino acid transport and metabolism	K00283	E	56 kDa	0.0034845	0.0029305	0.002905	0.0022663	0.0022266	0.0026261	1	0.00310667	0.002373	0.763841	-0.388655	3	3
hypothetical protein	G5B5_13830	Information storage and processing	Transcription	K10439	K	45 kDa	6.4875e-05	0.00016755		0.00010103	8.6073e-05	0.00012787	0	0.000116213	0.000104991	0.90344	-0.1465	2	3
hypothetical protein	G5B5_03485	Information storage and processing	Replication, recombination and repair	K01144	L	99 kDa		4.2952e-05	2.374e-05	3.6258e-05	2.8961e-05		0	3.3346e-05	3.26095e-05	0.977913	-0.0322214	2	2
hypothetical protein	G5B5_08635	Information storage and processing	Transcription	-	K	25 kDa	0.00019598	0.00021692	0.00023978	0.00021974	0.00023401	0.00018542	0	0.00021756	0.000213057	0.979301	-0.0301761	3	3
hypothetical protein	G5B5_07550	Information storage and processing	Replication, recombination and repair	-	L	60 kDa	0.00014135	0.00010431	0.00013452	0.0001761	0.0001094	0.00011145	0	0.000126727	0.000132317	1.04411	0.0622747	3	3
Homoserine kinase	G5B5_00895	Metabolism	Amino acid transport and metabolism	K00872	E	32 kDa	8.6928e-05				5.7666e-05	0.00010281	0	8.6928e-05	8.0238e-05	0.92304	-0.115535	1	2
hypothetical protein	G5B5_03750	Information storage and processing	Transcription	-	K	10 kDa	0.00018291	0.00020245	0.0002238	0.00017091	0.00027301		0	0.000203053	0.00022196	1.09311	0.128441	3	2
hypothetical protein	G5B5_11180	Information storage and processing	Translation, ribosomal structure and biogenesis	K02890	J	19 kDa	0.0021051	0.0022732	0.001759	0.0015831	0.0022991	0.0029146	0	0.00204577	0.0022656	1.10746	0.147252	3	3
hypothetical protein	G5B5_14090	Information storage and processing	Transcription	-	K	26 kDa	0.00030145	0.00012512	0.00018442	0.00031687	0.00018748	0.00022282	0	0.000203663	0.00024239	1.19015	0.251144	3	3
hypothetical protein	G5B5_13020	Information storage and processing	Translation, ribosomal structure and biogenesis	-	J	16 kDa	0.0003443	0.00025406	0.00042127	0.00037532	0.00039971	0.00047506	0	0.000339877	0.000416697	1.22602	0.293986	3	3
Copper homeostasis protein CutC	G5B5_12730	Metabolism	Inorganic ion transport and metabolism	K06201	P	26 kDa	0.00010494	7.7433e-05	8.5596e-05			8.2736e-05	0	8.9323e-05	8.2736e-05	0.926256	-0.110516	3	1
hypothetical protein	G5B5_13720	Information storage and processing	Translation, ribosomal structure and biogenesis	K05808	J	12 kDa	0.00024616	0.00027246		0.00038334	0.0003266	0.00029112	0	0.00025931	0.000333687	1.28683	0.363816	2	3
hypothetical protein	G5B5_13295	Information storage and processing	Transcription	K03088	K	25 kDa	0.00019598	0.00017353	0.00023978	0.00021974	0.00039002	0.00032448	0	0.000203097	0.000311413	1.53333	0.616664	3	3
Thymidylate synthase ThyX	G5B5_14755	Metabolism	Nucleotide transport and metabolism	-	F	59 kDa	0.00070104	0.00070205	0.00077606	0.00053026	0.0005481	0.00059221	1	0.000726383	0.000556857	0.766615	-0.383425	3	3
Cytochrome c oxidase subunit 2	G5B5_07970	Metabolism	Energy production and conversion	K02275	C	39 kDa	0.00047123	0.00046668	0.00051587	0.00039395	0.00037019	0.00035198	1	0.000484593	0.00037204	0.767737	-0.381317	3	3
hypothetical protein	G5B5_08085	Metabolism	Carbohydrate transport and metabolism	-	G	89 kDa	0.00021545	0.00015501	7.9084e-05	8.0525e-05	0.00011792	7.6442e-05	0	0.000149848	9.1629e-05	0.61148	-0.709624	3	3
dTDP-4-dehydrorhamnose reductase	G5B5_10890	Cellular processing and signaling	Cell wall/membrane/envelope biogenesis	K00067,K01790	M	33 kDa	0.00037793	0.00038614	0.00049799	0.00035313	0.00037607	0.00024067	1	0.000420687	0.00032329	0.768482	-0.379917	3	3
Branched-chain-amino-acid aminotransferase	G5B5_11295	Metabolism	Amino acid transport and metabolism	K00826	E	34 kDa	0.002569	0.0023748	0.0026251	0.0018992	0.002135	0.0018029	1	0.00252297	0.0019457	0.771195	-0.374832	3	3
hypothetical protein	G5B5_01800	Poorly characterized	Function unknown	-	S	50 kDa	0.0029461	0.0028938	0.0028646	0.0020782	0.002388	0.0022613	1	0.0029015	0.0022425	0.772876	-0.371691	3	3
N-acetylmannosamine kinase	G5B5_12250	Poorly characterized	Function unknown	-	S	35 kDa	0.00096954	0.00092409	0.0011863	0.00080525	0.00085757	0.00073257	1	0.00102664	0.000798463	0.777742	-0.362637	3	3
Acetolactate synthase large subunit	G5B5_08835	Metabolism	Amino acid transport and metabolism	K01652	E	67 kDa	0.00097395	0.00089054	0.0010708	0.00077814	0.00068824	0.00081798	1	0.00097843	0.000761453	0.77824	-0.361713	3	3
hypothetical protein	G5B5_09790	Metabolism	Carbohydrate transport and metabolism	-	G	15 kDa	0.00083924	0.00092891	0.00086886	0.00072384	0.00064239	0.00068713	1	0.000879003	0.000684453	0.77867	-0.360916	3	3
hypothetical protein	G5B5_08685	Metabolism	Amino acid transport and metabolism	-	E	55 kDa	0.00087273	0.00061823	0.00064069	0.00052189	0.00050369	0.00063993	0	0.00071055	0.00055517	0.781324	-0.356007	3	3
hypothetical protein	G5B5_12765	Metabolism	Carbohydrate transport and metabolism	-	G	39 kDa	0.00010121	5.601e-05	0.00015479		7.5531e-05	8.977e-05	0	0.000104003	8.26505e-05	0.794691	-0.331534	3	2
Thioredoxin reductase	G5B5_11745	Cellular processing and signaling	Post-translational modification, protein turnover, and chaperones	K00384	O	39 kDa	0.00078435	0.00072814	0.0008049	0.00059103	0.0006546	0.00056854	1	0.000772463	0.000604723	0.782851	-0.353191	3	3
hypothetical protein	G5B5_05960	Metabolism	Lipid transport and metabolism	K01073,K10806	I	19 kDa	0.0007105	0.00084259	0.0010556	0.00071128	0.0006565	0.00078025	0	0.000869563	0.00071601	0.823413	-0.280311	3	3
Alanine dehydrogenase	G5B5_03770	Metabolism	Amino acid transport and metabolism	K00259,K00298	E	39 kDa	0.0014436	0.0013883	0.0014767	0.0011719	0.0010361	0.0011755	1	0.0014362	0.00112783	0.78529	-0.348703	3	3
hypothetical protein	G5B5_05930	Metabolism	Amino acid transport and metabolism	-	E	78 kDa	0.00023004	0.00028291	0.00021891	0.000203	0.0002289	0.00018137	0	0.000243953	0.000204423	0.837961	-0.255045	3	3
5-amino-6-(5-phospho-D-ribitylamino)uracil phosphatase YwtE	G5B5_03905	Poorly characterized	Function unknown	K07024	S	33 kDa	5.7197e-05			5.3443e-05			0	5.7197e-05	5.3443e-05	0.934367	-0.0979385	1	1
hypothetical protein	G5B5_11095	unclassified	unclassified	-	-	11 kDa	0.00018881			0.00017642			0	0.00018881	0.00017642	0.934378	-0.0979211	1	1
hypothetical protein	G5B5_13650	Metabolism	Coenzyme transport and metabolism	K03635	H	25 kDa	0.00078457	0.00090975	0.0007771	0.00080289	0.000632	0.00066277	0	0.000823807	0.00069922	0.848767	-0.236559	3	3
hypothetical protein	G5B5_02890	Metabolism	Amino acid transport and metabolism	K01273	E	41 kDa	0.000467	0.0005686	0.00051426	0.0003709	0.00053441	0.00041423	0	0.00051662	0.000439847	0.851393	-0.232103	3	3
Aspartate aminotransferase	G5B5_02565	Metabolism	Amino acid transport and metabolism	K00812	E	43 kDa	0.0041576	0.0033535	0.0038423	0.0029136	0.0029488	0.0030601	1	0.00378447	0.00297417	0.785888	-0.347605	3	3
hypothetical protein	G5B5_01670	Metabolism	Inorganic ion transport and metabolism	-	P	83 kDa	0.0005567	0.000552	0.0004541	0.0004118	0.00061167	0.00037034	0	0.000520933	0.000464603	0.891867	-0.165099	3	3
Uroporphyrinogen decarboxylase	G5B5_06245	Metabolism	Coenzyme transport and metabolism	K01599	H	43 kDa		4.9329e-05		4.1642e-05	4.4347e-05	5.2707e-05	0	4.9329e-05	4.6232e-05	0.937217	-0.0935443	1	3
GTPase Obg	G5B5_07475	Poorly characterized	Function unknown	K03979	S	41 kDa		5.1012e-05		4.3063e-05	4.5861e-05	5.4506e-05	0	5.1012e-05	4.781e-05	0.93723	-0.0935243	1	3
hypothetical protein	G5B5_08265	Metabolism	Lipid transport and metabolism	K02372	I	20 kDa	0.0011994	0.0010621	0.001174	0.001031	0.0011935	0.00090784	0	0.00114517	0.00104411	0.911757	-0.133279	3	3
hypothetical protein	G5B5_13010	Metabolism	Energy production and conversion	K01426,K01455	C	25 kDa		8.5244e-05	0.00028269	0.00021588	0.00015327	0.00013662	0	0.000183967	0.00016859	0.916414	-0.125928	2	3
hypothetical protein	G5B5_10870	Metabolism	Carbohydrate transport and metabolism	K01192	G	133 kDa	7.9881e-05	0.00010449	5.3312e-05	9.4995e-05	0.00010117	2.5765e-05	0	7.92277e-05	7.39767e-05	0.933723	-0.098934	3	3
hypothetical protein	G5B5_14725	Metabolism	Lipid transport and metabolism	-	I	17 kDa	0.00052329	0.0012228	0.00078255	0.00092357	0.00075214	0.00068764	0	0.00084288	0.000787783	0.934633	-0.0975284	3	3
hypothetical protein	G5B5_12795	Metabolism	Inorganic ion transport and metabolism	-	P	113 kDa	8.2361e-05	0.00016409	0.00014108	0.00016161	0.00016391	3.8962e-05	0	0.000129177	0.000121494	0.940523	-0.0884642	3	3
hypothetical protein	G5B5_15130	Metabolism	Nucleotide transport and metabolism	K01515	F	24 kDa	0.00095345	0.00074752	0.00082633	0.00070528	0.00083016	0.0008457	0	0.000842433	0.000793713	0.942168	-0.0859445	3	3
hypothetical protein	G5B5_08020	Metabolism	Carbohydrate transport and metabolism	K06044	G	96 kDa	0.00036881	0.00086179	0.0005766	0.00075621	0.00061165	0.00039983	0	0.0006024	0.00058923	0.978137	-0.0318909	3	3
hypothetical protein	G5B5_06035	Metabolism	Coenzyme transport and metabolism	K03405	H	59 kDa	0.00010034	3.702e-05		7.8128e-05	3.3282e-05	9.8889e-05	0	6.868e-05	7.00997e-05	1.02067	0.0295175	2	3
hypothetical protein	G5B5_00880	Metabolism	Inorganic ion transport and metabolism	K02020	P	24 kDa	0.00011256	0.00020765	0.00013772	0.00010517	0.00018668	0.00017749	0	0.000152643	0.000156447	1.02492	0.0355063	3	3
hypothetical protein	G5B5_12630	Metabolism	Carbohydrate transport and metabolism	-	G	34 kDa	0.00011329	0.00021943	0.00013861	0.00018524	0.00014091	0.00016747	0	0.00015711	0.00016454	1.04729	0.0666633	3	3
hypothetical protein	G5B5_07990	Metabolism	Energy production and conversion	-	C	28 kDa	0.00044584	0.00022776	0.0003357	0.00025636	0.00037539	0.00044616	0	0.000336433	0.000359303	1.06798	0.0948817	3	3
hypothetical protein	G5B5_01235	Metabolism	Amino acid transport and metabolism	-	E	34 kDa	0.00017048	0.0001887	0.00027812	0.00026548	0.00022619	0.00020162	0	0.000212433	0.000231097	1.08786	0.121486	3	3
hypothetical protein	G5B5_06170	Metabolism	Inorganic ion transport and metabolism	-	P	127 kDa	4.468e-05	4.1212e-05	2.7334e-05	5.5664e-05	5.187e-05	1.7614e-05	0	3.7742e-05	4.1716e-05	1.10529	0.14443	3	3
hypothetical protein	G5B5_01080	Metabolism	Nucleotide transport and metabolism	K05873	F	22 kDa	0.00059138	0.00060422	0.00077923	0.00072259	0.000679	0.000807	0	0.000658277	0.000736197	1.11837	0.161397	3	3
hypothetical protein	G5B5_09010	unclassified	unclassified	-	-	31 kDa	6.2047e-05	6.8677e-05			6.1742e-05		0	6.5362e-05	6.1742e-05	0.944616	-0.0821999	2	1
hypothetical protein	G5B5_15865	Metabolism	Lipid transport and metabolism	K01858	I	50 kDa	0.0025057	0.0032249	0.0019251	0.0027224	0.0028799	0.0030323	0	0.0025519	0.0028782	1.12787	0.173595	3	3
hypothetical protein	G5B5_13855	Metabolism	Amino acid transport and metabolism	-	E	26 kDa	0.00010975	0.00020245	0.00017904	0.00020509	0.00018201	0.00017306	0	0.000163747	0.00018672	1.1403	0.189411	3	3
hypothetical protein	G5B5_14845	Metabolism	Carbohydrate transport and metabolism	K01187,K01811	G	88 kDa	3.3468e-05	7.4088e-05	4.0949e-05	3.1271e-05	9.9909e-05	3.9581e-05	0	4.95017e-05	5.69203e-05	1.14987	0.201467	3	3
hypothetical protein	G5B5_06720	Metabolism	Carbohydrate transport and metabolism	K01218,K12373	G	76 kDa	8.9328e-05	0.00014125	0.0001093	0.00017885	0.00013968	7.5461e-05	0	0.000113293	0.00013133	1.15921	0.213146	3	3
hypothetical protein	G5B5_03645	Metabolism	Carbohydrate transport and metabolism	K05343,K06044	G	100 kDa		0.00011005	4.8663e-05	0.0001022	0.00013852	3.5278e-05	0	7.93565e-05	9.19993e-05	1.15932	0.213275	2	3
hypothetical protein	G5B5_11495	Metabolism	Energy production and conversion	K11261	C	23 kDa	0.00079435	0.00064785	0.00076731	0.00062503	0.00099845	0.00093945	0	0.000736503	0.00085431	1.15995	0.214068	3	3
hypothetical protein	G5B5_13255	Metabolism	Amino acid transport and metabolism	-	E	44 kDa	4.1808e-05	6.9413e-05		7.8128e-05	4.1602e-05	7.4167e-05	0	5.56105e-05	6.46323e-05	1.16223	0.216899	2	3
hypothetical protein	G5B5_06365	Metabolism	Energy production and conversion	K01126	C	41 kDa	0.00011832	0.00020955	0.00023164	0.00026534	0.00023548	0.00016793	0	0.000186503	0.000222917	1.19524	0.257303	3	3
hypothetical protein	G5B5_11020	Metabolism	Carbohydrate transport and metabolism	K01206	G	51 kDa	7.6846e-05	4.2529e-05		5.3852e-05	9.5585e-05	6.8162e-05	0	5.96875e-05	7.2533e-05	1.21521	0.281209	2	3
hypothetical protein	G5B5_02830	Cellular processing and signaling	Post-translational modification, protein turnover, and chaperones	K01802	O	26 kDa	0.0005017	0.0005553	0.00048231	0.0004018	0.00042791	0.00038143	1	0.000513103	0.000403713	0.786807	-0.345918	3	3
hypothetical protein	G5B5_06890	Metabolism	Secondary metabolites biosynthesis, transport, and catabolism	K01061	Q	35 kDa	0.00018511	0.00017562	0.00029121	0.00032122	0.00031578	0.00018765	0	0.000217313	0.000274883	1.26492	0.339043	3	3
hypothetical protein	G5B5_03285	Metabolism	Amino acid transport and metabolism	K01256	E	67 kDa	7.5298e-05	5.0006e-05	3.6852e-05	0.00011257	4.4956e-05	5.3431e-05	0	5.4052e-05	7.0319e-05	1.30095	0.379567	3	3
hypothetical protein	G5B5_09225	Metabolism	Coenzyme transport and metabolism	K01854	H	64 kDa	3.0752e-05	3.4038e-05		2.8734e-05	6.1201e-05		0	3.2395e-05	4.49675e-05	1.3881	0.473112	2	2
L-ribulose-5-phosphate 4-epimerase UlaF	G5B5_04095	Metabolism	Carbohydrate transport and metabolism	K01786,K03077,K03080	G	26 kDa	0.00014881			0.0001738	7.4038e-05	0.00017599	0	0.00014881	0.000141276	0.949372	-0.0749551	1	3
hypothetical protein	G5B5_03530	Metabolism	Amino acid transport and metabolism	-	E	75 kDa	7.6345e-05	0.00012675	0.00010898	0.00016645	0.00017726	9.029e-05	0	0.000104025	0.000144667	1.39069	0.475802	3	3
hypothetical protein	G5B5_11965	Metabolism	Coenzyme transport and metabolism	K00963,K03750	H	51 kDa	7.138e-05	0.00011851	6.5502e-05	0.00013339	0.00010654	0.00012663	0	8.51307e-05	0.000122187	1.43528	0.521336	3	3
hypothetical protein	G5B5_06190	Metabolism	Carbohydrate transport and metabolism	K01191	G	132 kDa	1.4633e-05	5.6687e-05		5.469e-05	5.0963e-05		0	3.566e-05	5.28265e-05	1.48139	0.566955	2	2
hypothetical protein	G5B5_00720	Metabolism	Carbohydrate transport and metabolism	-	G	36 kDa	5.1194e-05	0.00011333	6.2637e-05	0.00021525	0.00010188	6.0544e-05	0	7.57203e-05	0.000125891	1.66258	0.733426	3	3
hypothetical protein	G5B5_04520	Metabolism	Inorganic ion transport and metabolism	K06213	P	46 kDa		4.5947e-05	0.00010158	0.00019394	0.00010327	9.8188e-05	0	7.37635e-05	0.000131799	1.78678	0.837364	2	3
GMP synthase [glutamine-hydrolyzing]	G5B5_06345	Metabolism	Nucleotide transport and metabolism	K01951,K03790	F	57 kDa	0.00077221	0.00072466	0.00069835	0.00050193	0.00053454	0.00069487	1	0.00073174	0.000577113	0.788686	-0.342476	3	3
ATP synthase subunit alpha	G5B5_04350	Metabolism	Energy production and conversion	K02111	C	56 kDa	0.0029779	0.002652	0.0028897	0.0021108	0.0021799	0.0024491	1	0.00283987	0.0022466	0.791093	-0.33808	3	3
3-oxoacyl-[acyl-carrier-protein] synthase 3	G5B5_05825	Metabolism	Lipid transport and metabolism	K00648	I	36 kDa	0.00077926	0.00066127	0.00076277	0.00055822	0.0005428	0.00064512	1	0.000734433	0.000582047	0.792511	-0.335497	3	3
hypothetical protein	G5B5_05545	Poorly characterized	Function unknown	-	S	106 kDa	0.00016632	0.00014533	8.5681e-05	9.8147e-05	0.00010452	4.1409e-05	0	0.000132444	8.13587e-05	0.614289	-0.703011	3	3
Dihydroxy-acid dehydratase	G5B5_04785	Metabolism	Amino acid transport and metabolism	K01687	E	60 kDa	0.0011358	0.0011213	0.0012207	0.0010183	0.00097751	0.00076242	1	0.00115927	0.00091941	0.793096	-0.334432	3	3
hypothetical protein	G5B5_07140	Poorly characterized	Function unknown	K04750	S	15 kDa	0.0017178	0.0011971	0.00077843	0.00089168	0.00069638	0.00097814	0	0.00123111	0.0008554	0.69482	-0.525289	3	3
hypothetical protein	G5B5_12690	Poorly characterized	Function unknown	K09958	S	18 kDa	0.00095067	0.00092845	0.0006158	0.00067927	0.00061211	0.00046295	0	0.00083164	0.000584777	0.703161	-0.508073	3	3
4-hydroxy-3-methylbut-2-en-1-yl diphosphate synthase (flavodoxin)	G5B5_13450	Metabolism	Lipid transport and metabolism	K03526	I	45 kDa	0.0020557	0.0021332	0.0018603	0.0016007	0.0016834	0.0015195	1	0.0020164	0.0016012	0.794088	-0.332628	3	3
hypothetical protein	G5B5_09815	Poorly characterized	Function unknown	-	S	18 kDa	0.00020418	0.000226		0.00014308	0.00015238	0.00018111	0	0.00021509	0.000158857	0.738559	-0.437215	2	3
putative mannose-6-phosphate isomerase GmuF	G5B5_12455	Metabolism	Carbohydrate transport and metabolism	K01809	G	33 kDa	0.0007035	0.00065408	0.00086076	0.00060474	0.00056003	0.00059904	1	0.000739447	0.000587937	0.795104	-0.330785	3	3
hypothetical protein	G5B5_11110	Poorly characterized	Function unknown	-	S	89 kDa	0.00015855	0.0002413	0.00018187	0.00014814	0.00020707	8.2036e-05	0	0.000193907	0.000145749	0.751643	-0.41188	3	3
hypothetical protein	G5B5_11770	Poorly characterized	Function unknown	K03392,K07045,K14333,K15063	S	35 kDa	0.00059432	0.00059802	0.0009916	0.00060579	0.00059139	0.00047923	0	0.00072798	0.000558803	0.767608	-0.381558	3	3
Lysine--tRNA ligase, heat inducible	G5B5_01945	Information storage and processing	Translation, ribosomal structure and biogenesis	K01874,K04567	J	65 kDa	0.0015012	0.0018462	0.0016141	0.0014452	0.0012826	0.0012195	1	0.00165383	0.00131577	0.795586	-0.32991	3	3
hypothetical protein	G5B5_04405	Poorly characterized	Function unknown	-	S	34 kDa	5.61e-05	6.2095e-05	0.00010296	5.2418e-05	5.5824e-05	6.6347e-05	0	7.37183e-05	5.81963e-05	0.789442	-0.341095	3	3
hypothetical protein	G5B5_01170	Poorly characterized	Function unknown	K07018	S	24 kDa	0.00045807	0.00042251	0.00060717	0.00039234	0.00034186	0.00045145	0	0.000495917	0.000395217	0.796942	-0.327454	3	3
hypothetical protein	G5B5_14990	Poorly characterized	Function unknown	-	S	18 kDa	0.00092133	0.00095978	0.0012599	0.00060766	0.0012404	0.00070504	0	0.001047	0.000851033	0.812828	-0.298978	3	3
hypothetical protein	G5B5_08280	Poorly characterized	Function unknown	-	S	10 kDa	0.00038173	0.0007394	0.00058382	0.00035667	0.00047481	0.00056431	0	0.000568317	0.000465263	0.818669	-0.288648	3	3
hypothetical protein	G5B5_02940	Poorly characterized	Function unknown	-	S	17 kDa	0.00032517	0.00029993	0.00026524	0.00025319	0.00016179	0.00032047	0	0.00029678	0.00024515	0.826033	-0.275729	3	3
UDP-glucose 4-epimerase	G5B5_06800	Cellular processing and signaling	Cell wall/membrane/envelope biogenesis	K01710,K08678	M	35 kDa	0.00035892	0.00039727	0.00040537	0.00030957	0.00032968	0.00029387	1	0.000387187	0.00031104	0.803333	-0.315929	3	3
hypothetical protein	G5B5_02190	Poorly characterized	Function unknown	-	S	71 kDa	0.00010468	0.00015931	0.00011207	0.00012226	0.00011718	7.7372e-05	0	0.000125353	0.000105604	0.842451	-0.247336	3	3
hypothetical protein	G5B5_13765	Poorly characterized	Function unknown	-	S	145 kDa	3.1996e-05	2.8332e-05	1.5659e-05	2.9896e-05	1.9103e-05	1.5136e-05	0	2.5329e-05	2.13783e-05	0.844026	-0.244641	3	3
putative murein peptide carboxypeptidase	G5B5_02370	Cellular processing and signaling	Defense mechanisms	K01297	V	32 kDa	6.0135e-05			5.6188e-05	5.9839e-05		0	6.0135e-05	5.80135e-05	0.964721	-0.0518163	1	2
hypothetical protein	G5B5_01365	Poorly characterized	Function unknown	K09137	S	12 kDa	0.00015539			0.00014519	0.00015463		0	0.00015539	0.00014991	0.964734	-0.051797	1	2
hypothetical protein	G5B5_13885	Poorly characterized	Function unknown	-	S	46 kDa	0.00038358	0.00049533	0.00033896	0.0003584	0.00025446	0.00042844	0	0.000405957	0.0003471	0.855017	-0.225974	3	3
hypothetical protein	G5B5_04560	Poorly characterized	Function unknown	-	S	14 kDa	0.00014633	0.00016196	0.00017904	0.00013672	0.00014561		0	0.000162443	0.000141165	0.869011	-0.202554	3	2
hypothetical protein	G5B5_15235	Poorly characterized	Function unknown	K01736	S	28 kDa	0.0013534	0.001306	0.0016135	0.0010052	0.0012777	0.0014364	0	0.0014243	0.00123977	0.870439	-0.200184	3	3
hypothetical protein	G5B5_15790	Poorly characterized	Function unknown	-	S	15 kDa	0.00038451	0.00056746	0.00023523	0.00053891	0.00012754	0.00037896	0	0.000395733	0.00034847	0.880568	-0.183494	3	3
hypothetical protein	G5B5_12290	Poorly characterized	Function unknown	-	S	11 kDa	0.0010166	0.00081834	0.0015831	0.0012089	0.00082766	0.00098369	0	0.00113935	0.00100675	0.88362	-0.178501	3	3
hypothetical protein	G5B5_08485	Poorly characterized	Function unknown	K07114	S	36 kDa	0.00037704	0.0003279	0.00026361	0.00037746	0.00026799	0.00022296	0	0.00032285	0.00028947	0.896608	-0.15745	3	3
hypothetical protein	G5B5_02480	Poorly characterized	Function unknown	-	S	20 kDa	0.00027872	0.00051417	0.00028419	0.00030383	0.00027735	0.00038457	0	0.000359027	0.000321917	0.896637	-0.157404	3	3
hypothetical protein	G5B5_03560	Poorly characterized	Function unknown	-	S	40 kDa	0.0002445	0.00031983	0.00035354	0.00024922	0.00026541	0.00031544	0	0.000305957	0.00027669	0.904344	-0.145057	3	3
hypothetical protein	G5B5_07150	Poorly characterized	Function unknown	-	S	15 kDa	0.00012542	0.00027765	0.00023019	0.00023438		0.00014833	0	0.000211087	0.000191355	0.906523	-0.141584	3	2
hypothetical protein	G5B5_10120	Poorly characterized	Function unknown	K06966	S	39 kDa	0.00038395	0.00031165	0.00025055	0.00026309	0.00028018	0.00033299	0	0.000315383	0.000292087	0.926132	-0.11071	3	3
hypothetical protein	G5B5_09795	Poorly characterized	Function unknown	-	S	19 kDa	0.00010209	0.0001695	0.00018737	9.5389e-05	0.00015238	0.00018111	0	0.000152987	0.00014296	0.934458	-0.0977977	3	3
hypothetical protein	G5B5_08040	Poorly characterized	Function unknown	-	S	68 kDa	2.7872e-05	4.6275e-05	3.4103e-05	2.6043e-05	4.1602e-05		0	3.60833e-05	3.38225e-05	0.937344	-0.0933493	3	2
hypothetical protein	G5B5_07270	Poorly characterized	Function unknown	-	S	16 kDa	0.0012279	0.0016989	0.00067609	0.0015489	0.00054985	0.001307	0	0.00120096	0.00113525	0.945283	-0.0811821	3	3
hypothetical protein	G5B5_03155	Poorly characterized	Function unknown	K09767	S	18 kDa	0.00063468	0.00064395	0.00038828	0.00059302	0.00042103	0.00056295	0	0.000555637	0.000525667	0.946062	-0.0799936	3	3
hypothetical protein	G5B5_03215	Poorly characterized	Function unknown	-	S	28 kDa			8.3598e-05	9.576e-05	6.7988e-05	8.0804e-05	0	8.3598e-05	8.15173e-05	0.975111	-0.0363616	1	3
hypothetical protein	G5B5_07480	Poorly characterized	Function unknown	-	S	121 kDa	3.93e-05	6.9599e-05	4.8086e-05	5.8754e-05	6.2571e-05	2.7887e-05	0	5.23283e-05	4.97373e-05	0.950486	-0.0732632	3	3
hypothetical protein	G5B5_12790	Poorly characterized	Function unknown	K05989	S	93 kDa	0.00017726	0.00032316	0.00020413	0.00021434	0.0003009	0.00016031	0	0.00023485	0.000225183	0.958839	-0.0606395	3	3
hypothetical protein	G5B5_03350	Poorly characterized	Function unknown	-	S	17 kDa	0.00016462	0.00024295	0.00013428	0.00015382	0.00010921	0.00025958	0	0.000180617	0.000174203	0.964492	-0.0521588	3	3
hypothetical protein	G5B5_02495	Poorly characterized	Function unknown	-	S	24 kDa	0.001215	0.0013015	0.0012948	0.0014649	0.0011311	0.0011125	0	0.00127043	0.00123617	0.973028	-0.0394474	3	3
hypothetical protein	G5B5_02880	Poorly characterized	Function unknown	-	S	14 kDa	0.0062163	0.0058874	0.0050967	0.0067065	0.0054842	0.0048506	0	0.00573347	0.00568043	0.99075	-0.0134067	3	3
hypothetical protein	G5B5_14005	Poorly characterized	Function unknown	-	S	15 kDa	0.0012453	0.0013784	0.0022094	0.0017454	0.0014871	0.0016201	0	0.00161103	0.00161753	1.00403	0.0058091	3	3
hypothetical protein	G5B5_07250	Poorly characterized	Function unknown	-	S	31 kDa	0.00024819	0.00024037	0.00030367	0.0002319	0.00027784	0.00029352	0	0.000264077	0.000267753	1.01392	0.0199477	3	3
hypothetical protein	G5B5_15160	Poorly characterized	Function unknown	-	S	19 kDa	0.0005681	0.00074313	0.00082147	0.00072384	0.00071947	0.00073294	0	0.0007109	0.000725417	1.02042	0.0291633	3	3
hypothetical protein	G5B5_02125	Poorly characterized	Function unknown	-	S	19 kDa	0.0001951	0.00021595		0.00022787	0.00019414		0	0.000205525	0.000211005	1.02666	0.0379633	2	2
hypothetical protein	G5B5_10730	Poorly characterized	Function unknown	-	S	11 kDa	0.0036043	0.0013298	0.0012438	0.0023315	0.002483	0.0015302	0	0.0020593	0.0021149	1.027	0.0384354	3	3
hypothetical protein	G5B5_16545	Poorly characterized	Function unknown	-	S	35 kDa	8.5516e-05	6.3103e-05	0.00010463	7.9904e-05	0.00011346	6.7424e-05	0	8.44163e-05	8.69293e-05	1.02977	0.0423209	3	3
hypothetical protein	G5B5_15750	Poorly characterized	Function unknown	-	S	28 kDa	0.00024101	0.00038109	0.00046339	0.00045039	0.00034261	0.00032575	0	0.00036183	0.000372917	1.03064	0.0435412	3	3
hypothetical protein	G5B5_10010	Poorly characterized	Function unknown	-	S	11 kDa	0.00015819	0.0001751	0.00029033	0.00022172	0.00023612	0.00018709	0	0.000207873	0.000214977	1.03417	0.0484754	3	3
Thiazole tautomerase	G5B5_12240	Metabolism	Coenzyme transport and metabolism	K00788	H	21 kDa			0.00010962	8.3709e-05	0.00013372	0.00010595	0	0.00010962	0.000107793	0.983333	-0.0242475	1	3
Putative glutamate--cysteine ligase 2	G5B5_16550	Poorly characterized	Function unknown	K06048	S	43 kDa			5.7599e-05	4.3986e-05	7.0266e-05	5.5675e-05	0	5.7599e-05	5.66423e-05	0.983391	-0.0241631	1	3
Ribosomal RNA large subunit methyltransferase E	G5B5_07645	unclassified	unclassified	-	-	59 kDa		7.4752e-05		6.3104e-05	8.4004e-05		0	7.4752e-05	7.3554e-05	0.983974	-0.0233084	1	2
hypothetical protein	G5B5_13210	Poorly characterized	Function unknown	-	S	32 kDa	0.00029863	0.0004297	0.00054808	0.00047435	0.00047545	0.00038849	0	0.00042547	0.000446097	1.04848	0.068299	3	3
hypothetical protein	G5B5_09485	Poorly characterized	Function unknown	K07164	S	29 kDa	0.00023192	0.00018336	0.00020269	0.00018574	0.00023077	0.0002351	0	0.00020599	0.000217203	1.05444	0.0764719	3	3
hypothetical protein	G5B5_07130	Poorly characterized	Function unknown	-	S	37 kDa	0.00013262	0.00011744	0.00016227	0.0001487	0.00013197	0.00015685	0	0.000137443	0.00014584	1.06109	0.0855495	3	3
hypothetical protein	G5B5_04680	Poorly characterized	Function unknown	-	S	80 kDa	8.3503e-05	0.00021126	0.00017515	0.00017834	0.00016618	0.00015519	0	0.000156638	0.00016657	1.06341	0.0886974	3	3
hypothetical protein	G5B5_14000	Poorly characterized	Function unknown	-	S	35 kDa	0.00025448	0.00028168	0.00034251	0.00030912	0.0003292	0.00030097	0	0.00029289	0.000313097	1.06899	0.0962492	3	3
hypothetical protein	G5B5_06725	Poorly characterized	Function unknown	-	S	51 kDa	3.736e-05	6.2029e-05	4.5712e-05	5.2363e-05	3.7176e-05	6.6277e-05	0	4.8367e-05	5.19387e-05	1.07385	0.102786	3	3
hypothetical protein	G5B5_04310	Poorly characterized	Function unknown	K02650	S	19 kDa	0.00035731	0.00045199	0.00037473	0.00033386	0.00045714	0.00048295	0	0.000394677	0.00042465	1.07594	0.105603	3	3
hypothetical protein	G5B5_13640	Poorly characterized	Function unknown	K01301	S	77 kDa	0.00033294	0.00040946	0.00045263	0.00041478	0.00040492	0.00046667	0	0.000398343	0.00042879	1.07643	0.106259	3	3
hypothetical protein	G5B5_08430	Poorly characterized	Function unknown	-	S	56 kDa	6.7797e-05	7.5041e-05	6.2214e-05	7.9184e-05	8.4329e-05	6.0135e-05	0	6.83507e-05	7.45493e-05	1.09069	0.12524	3	3
hypothetical protein	G5B5_06465	Poorly characterized	Function unknown	-	S	41 kDa	4.9324e-05	5.4595e-05	6.035e-05	4.6087e-05	7.3622e-05		0	5.47563e-05	5.98545e-05	1.09311	0.128434	3	2
hypothetical protein	G5B5_12560	Poorly characterized	Function unknown	-	S	135 kDa	2.7983e-05	3.0973e-05		4.5756e-05	2.7845e-05	2.4821e-05	0	2.9478e-05	3.28073e-05	1.11294	0.15438	2	3
Protein phosphatase PrpC	G5B5_16695	Cellular processing and signaling	Signal transduction mechanisms	K01090,K20074	T	27 kDa			8.4919e-05	6.485e-05	0.00010359		0	8.4919e-05	8.422e-05	0.991769	-0.0119245	1	2
Phosphate import ATP-binding protein PstB 3	G5B5_12540	Metabolism	Inorganic ion transport and metabolism	K02036	P	28 kDa			8.5256e-05	6.5107e-05	0.00010401		0	8.5256e-05	8.45585e-05	0.991819	-0.0118516	1	2
hypothetical protein	G5B5_09470	Poorly characterized	Function unknown	-	S	61 kDa	0.00051553	0.00062249	0.00063078	0.00064226	0.00077726	0.00057275	0	0.0005896	0.00066409	1.12634	0.171642	3	3
hypothetical protein	G5B5_00860	Poorly characterized	Function unknown	-	S	15 kDa	0.0010585	0.00089597	0.0010666	0.0010473	0.0011773	0.0011783	0	0.00100702	0.0011343	1.12639	0.171705	3	3
hypothetical protein	G5B5_14485	Poorly characterized	Function unknown	-	S	27 kDa	0.00017489	0.00019358	0.00042798	0.00026147	0.00034807	0.00028958	0	0.000265483	0.000299707	1.12891	0.17493	3	3
hypothetical protein	G5B5_16525	Poorly characterized	Function unknown	K06960	S	12 kDa	0.00090048	0.00041529	0.00091815	0.0009115	0.00082138	0.00079872	0	0.00074464	0.000843867	1.13325	0.180472	3	3
hypothetical protein	G5B5_12865	Information storage and processing	Transcription	-	K	24 kDa	8.1672e-05				8.1269e-05		0	8.1672e-05	8.1269e-05	0.995066	-0.00713641	1	1
Hydrogenase maturation factor HypD	G5B5_15485	Cellular processing and signaling	Post-translational modification, protein turnover, and chaperones	K04654	O	40 kDa	4.7846e-05				4.761e-05		0	4.7846e-05	4.761e-05	0.995068	-0.00713369	1	1
Amidophosphoribosyltransferase	G5B5_01665	Metabolism	Nucleotide transport and metabolism	K00764,K03558	F	56 kDa	3.4498e-05				3.4328e-05		0	3.4498e-05	3.4328e-05	0.995072	-0.00712692	1	1
hypothetical protein	G5B5_12635	Poorly characterized	Function unknown	-	S	43 kDa	0.00013404	7.4182e-05	5.4668e-05	0.00010437	8.8921e-05	0.00010568	0	8.763e-05	9.9657e-05	1.13725	0.185546	3	3
hypothetical protein	G5B5_15250	Poorly characterized	Function unknown	-	M	13 kDa	0.00088478	0.0010546	0.00099928	0.0010811	0.00074497	0.0015293	0	0.000979553	0.00111846	1.1418	0.191313	3	3
hypothetical protein	G5B5_04945	Poorly characterized	Function unknown	K06951	S	22 kDa		9.7667e-05	0.00016194	0.00016489	0.00017561	0.00010436	0	0.000129804	0.000148287	1.14239	0.19206	2	3
hypothetical protein	G5B5_11510	Poorly characterized	Function unknown	-	S	17 kDa	0.0061667	0.0074041	0.0067139	0.0085453	0.0057203	0.0089618	0	0.00676157	0.00774247	1.14507	0.195436	3	3
hypothetical protein	G5B5_14595	Poorly characterized	Function unknown	-	S	16 kDa	0.00035835	0.00052886	0.00021923	0.00055806	0.00035659	0.00035318	0	0.000368813	0.00042261	1.14586	0.196436	3	3
putative protein	G5B5_01015	Poorly characterized	Function unknown	K08999	S	20 kDa	0.00054563	0.00060393	0.00048553	0.00046347	0.00039487	0.0004693	1	0.00054503	0.000442547	0.811968	-0.300506	3	3
hypothetical protein	G5B5_03895	Poorly characterized	Function unknown	-	S	16 kDa	0.00061124	0.00092258	0.00047592	0.00067497	0.00077412	0.00092005	0	0.000669913	0.000789713	1.17883	0.237355	3	3
hypothetical protein	G5B5_06680	Poorly characterized	Function unknown	K09967	S	25 kDa	7.9454e-05	8.7944e-05	0.00014582	0.00011136	0.00011859	0.00014095	0	0.000104406	0.000123633	1.18416	0.243863	3	3
hypothetical protein	G5B5_05505	Poorly characterized	Function unknown	-	S	17 kDa	0.0002078		0.00012713	0.00019417	0.00015508	0.00024576	0	0.000167465	0.000198337	1.18435	0.244092	2	3
hypothetical protein	G5B5_07690	Poorly characterized	Function unknown	-	S	14 kDa	0.00029266	0.00024295		0.00020509		0.00043264	0	0.000267805	0.000318865	1.19066	0.251763	2	2
hypothetical protein	G5B5_11865	Poorly characterized	Function unknown	K09121	S	50 kDa	5.5451e-05	4.0917e-05		5.1811e-05	5.5178e-05	6.5579e-05	0	4.8184e-05	5.75227e-05	1.19381	0.255576	2	3
hypothetical protein	G5B5_02335	Poorly characterized	Function unknown	-	S	61 kDa	7.688e-05	0.00010211	3.7626e-05	0.0001293	7.6501e-05	5.4554e-05	0	7.22053e-05	8.6785e-05	1.20192	0.26534	3	3
hypothetical protein	G5B5_12230	Poorly characterized	Function unknown	-	S	22 kDa	0.00013863	0.00015344		0.0001727	0.00013794	0.0002186	0	0.000146035	0.000176413	1.20802	0.272645	2	3
hypothetical protein	G5B5_07700	Poorly characterized	Function unknown	-	S	23 kDa	0.00024388	0.00022495	0.0002984	0.00030383	0.00036402	0.00028843	0	0.000255743	0.00031876	1.24641	0.317774	3	3
hypothetical protein	G5B5_12280	Poorly characterized	Function unknown	-	S	19 kDa	0.00031171	0.00040251	0.00019069	0.00029125	0.00041356	0.00043008	0	0.000301637	0.000378297	1.25415	0.326706	3	3
hypothetical protein	G5B5_05060	Poorly characterized	Function unknown	K06925,K07102	S	20 kDa	0.00025229	0.0002234	0.00024695	0.00042432	0.00025105	0.0002387	0	0.00024088	0.00030469	1.2649	0.339028	3	3
hypothetical protein	G5B5_14945	Poorly characterized	Function unknown	K09004	S	16 kDa	0.00059726	0.00013222	0.00021923	0.00044645	0.00047545	0.00028254	0	0.000316237	0.00040148	1.26956	0.344323	3	3
hypothetical protein	G5B5_05780	Poorly characterized	Function unknown	-	S	11 kDa	0.0018814	0.0014874	0.0013154	0.0016742	0.0018721	0.0024369	0	0.0015614	0.0019944	1.27732	0.353115	3	3
hypothetical protein	G5B5_13140	Poorly characterized	Function unknown	-	S	20 kDa		0.0001559	0.00011489	0.00021934	0.00014016	0.00016658	0	0.000135395	0.00017536	1.29517	0.373145	2	3
hypothetical protein	G5B5_12120	Poorly characterized	Function unknown	K06889	S	32 kDa		6.544e-05	0.00021702	0.00016573	0.00017649	0.00020977	0	0.00014123	0.000183997	1.30282	0.381633	2	3
hypothetical protein	G5B5_01755	Poorly characterized	Function unknown	-	S	40 kDa	0.0003746	0.00033688	0.00042969	0.00043752	0.00041935	0.00063685	0	0.00038039	0.000497907	1.30894	0.388396	3	3
hypothetical protein	G5B5_02840	Poorly characterized	Function unknown	-	S	16 kDa	0.00012633	0.00020974	0.00015457	0.00023607	0.00018856	0.0002241	0	0.000163547	0.000216243	1.32221	0.402953	3	3
hypothetical protein	G5B5_13655	Poorly characterized	Function unknown	K07114	S	35 kDa	8.231e-05	6.0736e-05	6.7139e-05	7.6908e-05	0.00010921		0	7.00617e-05	9.3059e-05	1.32824	0.40952	3	2
hypothetical protein	G5B5_11705	Poorly characterized	Function unknown	-	S	44 kDa	8.5865e-05	7.128e-05	5.253e-05	0.00012034	8.5442e-05	7.6162e-05	0	6.98917e-05	9.39813e-05	1.34467	0.427254	3	3
Adenosylhomocysteinase	G5B5_10800	Metabolism	Coenzyme transport and metabolism	K01251	H	52 kDa	0.0018958	0.0017317	0.0015089	0.0013758	0.001392	0.0014149	1	0.00171213	0.00139423	0.814325	-0.296323	3	3
hypothetical protein	G5B5_16380	Poorly characterized	Function unknown	-	S	49 kDa		4.1978e-05	6.9605e-05	7.0872e-05	5.6608e-05	0.00011213	0	5.57915e-05	7.987e-05	1.43158	0.517608	2	3
hypothetical protein	G5B5_07135	Poorly characterized	Function unknown	-	S	18 kDa	0.0002814	0.00043606	0.00013772	0.00047328	0.00050403	0.0003328	0	0.00028506	0.000436703	1.53197	0.615388	3	3
hypothetical protein	G5B5_04115	Poorly characterized	Function unknown	-	S	70 kDa	4.1808e-05	0.00015425	0.00010231	0.00016928	0.00016641	0.00013185	0	9.9456e-05	0.000155847	1.56699	0.647997	3	3
hypothetical protein	G5B5_12490	Poorly characterized	Function unknown	-	S	84 kDa		3.8159e-05	5.6242e-05	8.59e-05	5.7176e-05	8.1545e-05	0	4.72005e-05	7.48737e-05	1.58629	0.665656	2	3
hypothetical protein	G5B5_00885	Metabolism	Amino acid transport and metabolism	K01733	E	50 kDa	0.00067826	0.00075073	0.00069156	0.00056333	0.00054368	0.00062389	1	0.00070685	0.000576967	0.816251	-0.292916	3	3
hypothetical protein	G5B5_08620	unclassified	unclassified	-	-	24 kDa	0.00023729	0.00026264	0.00024194	0.00022172	0.00019677	0.00018709	1	0.00024729	0.00020186	0.816289	-0.292849	3	3
Arginine biosynthesis bifunctional protein ArgJ	G5B5_13615	Metabolism	Amino acid transport and metabolism	K00620	E	42 kDa	0.00050232	0.00043513	0.00042755	0.00034691	0.00041292	0.00036161	1	0.000455	0.000373813	0.821568	-0.283549	3	3
N-acetyl-alpha-D-glucosaminyl L-malate synthase	G5B5_16605	Cellular processing and signaling	Cell wall/membrane/envelope biogenesis	K00786,K13668	M	44 kDa	0.00044567	0.00044396	0.00040897	0.00035396	0.00039913	0.00031624	1	0.000432867	0.000356443	0.823448	-0.28025	3	3
hypothetical protein	G5B5_14690	Poorly characterized	Function unknown	K01301	S	82 kDa	7.052e-05	2.6018e-05		8.7855e-05	7.0172e-05	9.7301e-05	0	4.8269e-05	8.51093e-05	1.76323	0.81822	2	3
Aspartate-semialdehyde dehydrogenase 2	G5B5_03955	Metabolism	Amino acid transport and metabolism	K00133	E	40 kDa	0.0011972	0.0013511	0.0013787	0.0010529	0.0010045	0.0011938	1	0.001309	0.00108373	0.827909	-0.272455	3	3
Sorbitol dehydrogenase	G5B5_16720	Metabolism	Energy production and conversion	K00008	C	40 kDa		5.1691e-05	5.714e-05	4.3635e-05	4.647e-05		1	5.44155e-05	4.50525e-05	0.827935	-0.27241	2	2
1-deoxy-D-xylulose-5-phosphate synthase	G5B5_05170	Metabolism	Coenzyme transport and metabolism	K01662	H	31 kDa		6.9662e-05	7.7006e-05	5.8806e-05	6.2627e-05		1	7.3334e-05	6.07165e-05	0.827945	-0.272394	2	2
Ribosomal RNA large subunit methyltransferase H	G5B5_08910	Poorly characterized	Function unknown	K00783	S	16 kDa		0.00019436	0.00021485			0.00020767	0	0.000204605	0.00020767	1.01498	0.0214514	2	1
Homoserine dehydrogenase	G5B5_05465	Metabolism	Amino acid transport and metabolism	K00003,K12524	E	44 kDa		4.5624e-05	5.0433e-05			4.8748e-05	0	4.80285e-05	4.8748e-05	1.01498	0.0214523	2	1
Macrolide export protein MacA	G5B5_01685	Metabolism	Inorganic ion transport and metabolism	K02005,K13888	P	50 kDa	5.5803e-05			6.9521e-05		4.3997e-05	0	5.5803e-05	5.6759e-05	1.01713	0.0245065	1	2
hypothetical protein	G5B5_11055	unclassified	unclassified	-	-	64 kDa		6.656e-05	0.00011037	5.6188e-05	2.9919e-05	3.5559e-05	0	8.8465e-05	4.05553e-05	0.458434	-1.12522	2	3
hypothetical protein	G5B5_12160	unclassified	unclassified	-	-	133 kDa	5.6689e-05	9.4119e-05	4.3351e-05	4.6347e-05	3.5256e-05	1.6761e-05	0	6.47197e-05	3.2788e-05	0.506616	-0.981036	3	3
ATP synthase subunit delta	G5B5_04355	Metabolism	Energy production and conversion	K02113	C	19 kDa	0.0017366	0.0015484	0.0015936	0.0014424	0.0012961	0.0013122	1	0.0016262	0.00135023	0.8303	-0.268296	3	3
Fumarate reductase flavoprotein subunit	G5B5_02865	Metabolism	Energy production and conversion	K00239	C	65 kDa	0.0007304	0.00059396	0.00071129	0.00058497	0.00057847	0.00052886	1	0.00067855	0.0005641	0.831332	-0.266504	3	3
hypothetical protein	G5B5_06930	Information storage and processing	Translation, ribosomal structure and biogenesis	K02967	J	34 kDa	0.00090048	0.00087211	0.00086076	0.0007625	0.00072804	0.00069888	1	0.000877783	0.000729807	0.83142	-0.266351	3	3
hypothetical protein	G5B5_07245	Metabolism	Amino acid transport and metabolism	-	E	14 kDa	0.00073723	0.00066764	0.00073802	0.0005636	0.0006669	0.00055484	1	0.000714297	0.000595113	0.833146	-0.263359	3	3
hypothetical protein	G5B5_09980	Poorly characterized	Function unknown	-	S	67 kDa	0.00087944	0.00079495	0.00091462	0.00073955	0.00075842	0.00067605	1	0.000863003	0.000724673	0.839711	-0.252035	3	3
Thiazole synthase	G5B5_01805	Metabolism	Coenzyme transport and metabolism	K03149	H	27 kDa	0.00085739	0.00094901	0.00092317	0.00083317	0.00078492	0.00068952	1	0.000909857	0.000769203	0.845412	-0.242274	3	3
hypothetical protein	G5B5_08940	unclassified	unclassified	-	-	94 kDa	0.00157	0.0017378	0.0012132	0.00079139	0.0012539	0.00090396	0	0.001507	0.000983083	0.652345	-0.616294	3	3
hypothetical protein	G5B5_07075	unclassified	unclassified	-	-	120 kDa	7.8181e-05	7.7881e-05	2.8697e-05	5.844e-05	4.6677e-05	1.8492e-05	0	6.15863e-05	4.1203e-05	0.669028	-0.579861	3	3
Nucleotide-binding protein	G5B5_13725	Poorly characterized	Function unknown	K06958	S	34 kDa	0.00011552	0.00012787	0.00014135	0.00010794	0.00011495	0.00010247	1	0.000128247	0.000108453	0.845662	-0.241847	3	3
hypothetical protein	G5B5_03535	unclassified	unclassified	-	-	20 kDa	0.00034334	0.00021716	0.00042009	0.00022915	0.00024403	0.00023203	0	0.000326863	0.00023507	0.719169	-0.475597	3	3
hypothetical protein	G5B5_05080	unclassified	unclassified	-	-	22 kDa	0.0010423	0.00062123	0.00083388	0.00048696	0.00055849	0.0007586	0	0.00083247	0.00060135	0.722368	-0.469193	3	3
ATP synthase gamma chain	G5B5_04345	Metabolism	Energy production and conversion	K02115	C	41 kDa	0.001814	0.0018204	0.0018348	0.0014915	0.0014922	0.0016591	1	0.00182307	0.0015476	0.848899	-0.236335	3	3
Thioredoxin	G5B5_00905	Cellular processing and signaling	Post-translational modification, protein turnover, and chaperones	K03671	O	12 kDa	0.0025194	0.0028731	0.003176	0.0024254	0.002507	0.0023475	1	0.00285617	0.00242663	0.849612	-0.235124	3	3
hypothetical protein	G5B5_07980	unclassified	unclassified	-	-	24 kDa	0.0011073	0.0010506	0.0012097	0.0010716	0.00078707	0.00065481	0	0.00112253	0.000837827	0.746371	-0.422035	3	3
hypothetical protein	G5B5_12020	unclassified	unclassified	-	-	43 kDa	0.00022864	0.0003543	0.0003357	0.00029908	0.00020476	0.00021632	0	0.000306213	0.000240053	0.783941	-0.351182	3	3
hypothetical protein	G5B5_13700	unclassified	unclassified	-	-	25 kDa	0.00068465	0.00071323	0.00098553	0.00075261	0.00064121	0.00052393	0	0.00079447	0.00063925	0.804624	-0.313612	3	3
hypothetical protein	G5B5_08455	unclassified	unclassified	-	-	14 kDa	0.001509	0.0012906	0.0011749	0.0013459	0.0008873	0.00097344	0	0.00132483	0.00106888	0.806803	-0.309711	3	3
hypothetical protein	G5B5_05550	unclassified	unclassified	-	-	7 kDa		0.00025573	0.00042404	0.00032382	0.00022991	0.00027325	0	0.000339885	0.00027566	0.811039	-0.302157	2	3
CDP-glucose 4,6-dehydratase	G5B5_10900	Cellular processing and signaling	Cell wall/membrane/envelope biogenesis	K01709	M	41 kDa	0.00038069	0.0003687	0.00040757	0.00033347	0.00035514	0.00030953	1	0.000385653	0.000332713	0.862726	-0.213025	3	3
hypothetical protein	G5B5_03730	unclassified	unclassified	-	-	18 kDa	0.0012542	0.0019089	0.001151	0.0010254	0.0014041	0.0011125	0	0.00143803	0.00118067	0.821029	-0.284495	3	3
hypothetical protein	G5B5_08640	unclassified	unclassified	-	-	40 kDa	0.0001337	0.00019732	0.00019085	0.00014575	0.00013304	0.00015812	0	0.000173957	0.000145637	0.837201	-0.256354	3	3
hypothetical protein	G5B5_11700	unclassified	unclassified	-	-	17 kDa	0.0014536	0.001802	0.0014228	0.0015212	0.0010993	0.0013065	0	0.00155947	0.001309	0.83939	-0.252588	3	3
hypothetical protein	G5B5_00210	unclassified	unclassified	-	-	26 kDa	0.00025715	0.00036594	0.00035958	0.00030892	0.00025588	0.00026067	0	0.000327557	0.000275157	0.840028	-0.251491	3	3
hypothetical protein	G5B5_11715	unclassified	unclassified	-	-	12 kDa	0.00098464	0.001544	0.0012047	0.00099668	0.00097979	0.0011645	0	0.00124445	0.00104699	0.84133	-0.249257	3	3
hypothetical protein	G5B5_07920	unclassified	unclassified	-	-	17 kDa	0.00028692	0.00038109		0.00042894		0.00013573	0	0.000334005	0.000282335	0.845302	-0.242462	2	2
hypothetical protein	G5B5_00070	unclassified	unclassified	-	-	19 kDa		0.00017251		0.00019417	0.00015508	0.00018432	0	0.00017251	0.000177857	1.03099	0.0440351	1	3
hypothetical protein	G5B5_03085	unclassified	unclassified	-	-	25 kDa	0.00027983	0.00027101	0.00038518	0.0001961	0.00027845	0.00033094	0	0.000312007	0.000268497	0.860548	-0.216673	3	3
hypothetical protein	G5B5_11290	unclassified	unclassified	-	-	21 kDa	0.00018196	0.00025176		0.00021253	0.0001358	0.0002152	0	0.00021686	0.000187843	0.866196	-0.207234	2	3
hypothetical protein	G5B5_09295	unclassified	unclassified	-	-	33 kDa	5.9123e-05		7.2339e-05	5.5242e-05	5.8831e-05		1	6.5731e-05	5.70365e-05	0.867726	-0.204688	2	2
hypothetical protein	G5B5_00780	unclassified	unclassified	-	-	129 kDa	1.4572e-05	1.6129e-05	1.783e-05	1.3616e-05	1.45e-05		0	1.6177e-05	1.4058e-05	0.869012	-0.202553	3	2
hypothetical protein	G5B5_13555	unclassified	unclassified	-	-	19 kDa	0.00029931	0.00022086	0.00018311	0.00023305	0.00014892	0.00023599	0	0.000234427	0.000205987	0.878683	-0.186586	3	3
hypothetical protein	G5B5_10865	unclassified	unclassified	-	-	70 kDa	0.00010642	0.00013252	0.00017904	0.00011187	0.00014561	0.00011013	0	0.000139327	0.000122537	0.879492	-0.185258	3	3
hypothetical protein	G5B5_00415	unclassified	unclassified	-	-	30 kDa	0.00021414	0.0001693	0.00026201	0.0001715	0.00018264	0.00021707	0	0.00021515	0.000190403	0.884979	-0.176284	3	3
hypothetical protein	G5B5_15065	unclassified	unclassified	-	-	11 kDa	0.0018437	0.0011661	0.0011817	0.00098442	0.0013978	0.0013498	0	0.00139717	0.00124401	0.890378	-0.16751	3	3
hypothetical protein	G5B5_03945	unclassified	unclassified	-	-	20 kDa	0.00018484	0.00030688	0.00022615	0.00012953	0.00018393	0.0003279	0	0.00023929	0.000213787	0.893421	-0.162588	3	3
hypothetical protein	G5B5_08650	unclassified	unclassified	-	-	28 kDa		0.00022955	0.00012688	0.00022608	0.00013758	0.00012264	0	0.000178215	0.0001621	0.909576	-0.136735	2	3
hypothetical protein	G5B5_05715	unclassified	unclassified	-	-	23 kDa	0.00011972	8.8344e-05	0.00014649	0.00014915	7.9422e-05	9.4394e-05	0	0.000118185	0.000107655	0.910908	-0.134623	3	3
hypothetical protein	G5B5_08890	unclassified	unclassified	-	-	32 kDa	0.00011514	6.3723e-05	0.00010566	0.00010759	8.5932e-05	6.8088e-05	0	9.4841e-05	8.72033e-05	0.919469	-0.121128	3	3
hypothetical protein	G5B5_11710	unclassified	unclassified	-	-	27 kDa	0.00042828	0.00023702	0.00043668	0.00026678	0.00028411	0.0004643	0	0.000367327	0.000338397	0.921242	-0.118348	3	3
hypothetical protein	G5B5_06080	unclassified	unclassified	-	-	19 kDa	0.00010452	0.00017353		9.766e-05	0.00010401	0.00018542	0	0.000139025	0.00012903	0.928106	-0.107638	2	3
hypothetical protein	G5B5_06340	unclassified	unclassified	-	-	38 kDa	0.00010209	5.6499e-05	0.00012491	7.1542e-05	0.00010159	9.0553e-05	0	9.44997e-05	8.7895e-05	0.930109	-0.104528	3	3
hypothetical protein	G5B5_05395	unclassified	unclassified	-	-	20 kDa	9.1455e-05		0.0001119	8.5453e-05	9.1005e-05	0.00010816	0	0.000101678	9.48727e-05	0.933074	-0.0999361	2	3
hypothetical protein	G5B5_08760	unclassified	unclassified	-	-	34 kDa	0.0012944	0.0011836	0.0014461	0.0013672	0.0012321	0.0011648	0	0.00130803	0.0012547	0.959226	-0.0600569	3	3
hypothetical protein	G5B5_08490	unclassified	unclassified	-	-	19 kDa	0.00029429	0.00065147	0.00036008	0.00032081	0.00048807	0.00046406	0	0.00043528	0.000424313	0.974805	-0.0368137	3	3
hypothetical protein	G5B5_12195	unclassified	unclassified	-	-	11 kDa	0.0013303	0.0004908	0.0013021	0.0013258	0.001059	0.00073418	0	0.00104107	0.00103966	0.998649	-0.00195066	3	3
hypothetical protein	G5B5_02485	unclassified	unclassified	-	-	59 kDa	0.0001136	0.00023352	0.00027799	0.00024262	0.00019378	0.00019193	0	0.00020837	0.000209443	1.00515	0.00741238	3	3
hypothetical protein	G5B5_03545	unclassified	unclassified	-	-	7 kDa	0.00039908	0.00044172	0.00065105	0.00049718	0.00039711	0.0006293	0	0.000497283	0.000507863	1.02128	0.0303722	3	3
hypothetical protein	G5B5_02085	unclassified	unclassified	-	-	35 kDa	0.00036582	0.00046275	0.00083125	0.00058596	0.00049403	0.00061806	0	0.000553273	0.000566017	1.02303	0.0328521	3	3
hypothetical protein	G5B5_10505	unclassified	unclassified	-	-	23 kDa	7.9454e-05	8.7944e-05			7.9063e-05	9.3967e-05	0	8.3699e-05	8.6515e-05	1.03364	0.0477399	2	2
hypothetical protein	G5B5_11885	unclassified	unclassified	-	-	36 kDa	0.0003594	0.00031256	0.00050256	0.0003598	0.00043427	0.00042505	0	0.000391507	0.000406373	1.03797	0.0537689	3	3
hypothetical protein	G5B5_06815	unclassified	unclassified	-	-	23 kDa	0.00035835	0.00039665	0.00060288	0.00050225	0.00049031	0.00042381	0	0.000452627	0.000472123	1.04307	0.0608422	3	3
hypothetical protein	G5B5_13280	unclassified	unclassified	-	-	27 kDa	0.0003628	0.00044172	0.00057707	0.00044068	0.00046931	0.00055778	0	0.00046053	0.000489257	1.06238	0.0872964	3	3
hypothetical protein	G5B5_11675	unclassified	unclassified	-	-	24 kDa	0.0025028	0.0018908	0.0021387	0.0019302	0.0019766	0.0030539	0	0.00217743	0.00232023	1.06558	0.0916413	3	3
hypothetical protein	G5B5_10165	unclassified	unclassified	-	-	30 kDa	0.0001608	0.00010679	0.00019675	0.0001803	0.00012801	0.00019017	0	0.00015478	0.00016616	1.07352	0.102354	3	3
hypothetical protein	G5B5_08090	unclassified	unclassified	-	-	19 kDa	0.0001973	0.00021838	0.0002414	0.00027652	0.00019632	0.00023333	0	0.000219027	0.00023539	1.07471	0.103947	3	3
hypothetical protein	G5B5_08115	unclassified	unclassified	-	-	17 kDa	0.00011945	0.00013222	0.00014615	0.00016742	0.00011886	0.00014127	0	0.000132607	0.000142517	1.07473	0.103977	3	3
hypothetical protein	G5B5_08880	unclassified	unclassified	-	-	17 kDa	0.00010707		0.000131	0.00015006	0.00010654		0	0.000119035	0.0001283	1.07783	0.108135	2	2
hypothetical protein	G5B5_04750	unclassified	unclassified	-	-	16 kDa	0.00053032	0.0010435	0.00072096	0.0011562	0.00076224	0.0005575	0	0.000764927	0.000825313	1.07894	0.109621	3	3
hypothetical protein	G5B5_13320	unclassified	unclassified	-	-	27 kDa	0.00061492	0.00041594	0.00054339	0.00044688	0.00040793	0.00084845	0	0.00052475	0.000567753	1.08195	0.113634	3	3
hypothetical protein	G5B5_14715	unclassified	unclassified	-	-	30 kDa	0.0013264	0.0011536	0.0011592	0.0014754	0.0011313	0.0013446	0	0.00121307	0.0013171	1.08576	0.118706	3	3
hypothetical protein	G5B5_13530	unclassified	unclassified	-	-	33 kDa	0.00056826	0.00056609	0.00052147	0.00069026	0.00053719	0.00057125	0	0.00055194	0.000599567	1.08629	0.119409	3	3
hypothetical protein	G5B5_15390	unclassified	unclassified	-	-	10 kDa	0.0021703	0.003494	0.002414	0.0035026	0.0034357	0.0019833	0	0.00269277	0.00297387	1.10439	0.143251	3	3
hypothetical protein	G5B5_15060	unclassified	unclassified	-	-	35 kDa	0.00029444	0.00038516	0.00039301	0.0004752	0.00042617	0.00028491	0	0.000357537	0.000395427	1.10598	0.145319	3	3
hypothetical protein	G5B5_16830	unclassified	unclassified	-	-	22 kDa	0.00017827	0.00024665	0.00010906	0.00020821	0.00017739	0.00021083	0	0.000177993	0.00019881	1.11695	0.159567	3	3
hypothetical protein	G5B5_16100	unclassified	unclassified	-	-	22 kDa	0.00017737	0.00014724	0.00021702	8.2863e-05	0.00026474	0.00026221	0	0.000180543	0.000203271	1.12588	0.171059	3	3
hypothetical protein	G5B5_09305	unclassified	unclassified	-	-	8 kDa	0.0021356	0.0015759	0.0027582	0.002328	0.0025973	0.0023854	0	0.00215657	0.0024369	1.12999	0.176311	3	3
hypothetical protein	G5B5_03080	unclassified	unclassified	-	-	36 kDa	0.00015678	0.00017353	0.00019183	0.00017091	0.00023401	0.00018542	0	0.000174047	0.00019678	1.13062	0.177109	3	3
hypothetical protein	G5B5_15380	Metabolism	Inorganic ion transport and metabolism	K04758	P	10 kDa	0.00019954		0.00024414	0.00018644	0.00019856		1	0.00022184	0.0001925	0.867743	-0.204661	2	2
hypothetical protein	G5B5_00100	unclassified	unclassified	-	-	44 kDa	0.00030806	0.00048711	0.00040385	0.00049344	0.00048171	0.00039035	0	0.000399673	0.000455167	1.13885	0.187574	3	3
hypothetical protein	G5B5_15015	unclassified	unclassified	-	-	45 kDa	6.1974e-05	6.8596e-05	0.00012638	0.00011581	8.2225e-05	9.7726e-05	0	8.565e-05	9.8587e-05	1.15104	0.202944	3	3
hypothetical protein	G5B5_02720	unclassified	unclassified	-	-	23 kDa	0.00048776	0.00076483	0.00094493	0.00079756	0.00084938	0.00091335	0	0.000732507	0.00085343	1.16508	0.220431	3	3
hypothetical protein	G5B5_11975	unclassified	unclassified	-	-	10 kDa	0.0011329	0.0025078	0.00069305	0.0022052	0.00075152	0.0021213	0	0.00144458	0.00169267	1.17174	0.22865	3	3
hypothetical protein	G5B5_07560	unclassified	unclassified	-	-	29 kDa	0.00012817	7.0933e-05	7.8411e-05	0.00011976	9.5655e-05	0.00011369	0	9.25047e-05	0.000109702	1.1859	0.245987	3	3
hypothetical protein	G5B5_02895	unclassified	unclassified	-	-	11 kDa	0.0029869	0.001102	0.00099671	0.0020297	0.0022517	0.0018198	0	0.0016952	0.00203373	1.1997	0.262672	3	3
Methionine aminopeptidase	G5B5_05695	Metabolism	Amino acid transport and metabolism	K01262	E	43 kDa	0.0012832	0.001196	0.001267	0.0010728	0.0011425	0.0010383	1	0.00124873	0.00108453	0.868507	-0.203391	3	3
hypothetical protein	G5B5_05555	unclassified	unclassified	-	-	32 kDa	0.00014393	0.00025489	0.00021132	0.00024207	0.0002578	0.00023831	0	0.00020338	0.00024606	1.20985	0.274832	3	3
hypothetical protein	G5B5_00065	unclassified	unclassified	-	-	12 kDa		0.00017049				0.00018216	0	0.00017049	0.00018216	1.06845	0.0955191	1	1
Multidrug resistance protein MdtN	G5B5_07375	Cellular processing and signaling	Defense mechanisms	K03543,K15548,K15549	V	41 kDa		5.1553e-05				5.5084e-05	0	5.1553e-05	5.5084e-05	1.06849	0.0955769	1	1
hypothetical protein	G5B5_10605	unclassified	unclassified	-	-	101 kDa	2.811e-05	3.1114e-05		4.3775e-05	2.7972e-05		0	2.9612e-05	3.58735e-05	1.21145	0.276737	2	2
hypothetical protein	G5B5_16775	unclassified	unclassified	-	-	17 kDa	0.00011477	0.00038109	0.00028084	0.00042894		0.0002036	0	0.0002589	0.00031627	1.22159	0.288762	3	2
Aminopeptidase T	G5B5_03980	Metabolism	Amino acid transport and metabolism	K19689	E	46 kDa	0.0012166	0.001167	0.0010668	0.00094728	0.001029	0.0010311	1	0.00115013	0.00100246	0.871603	-0.198256	3	3
Superoxide dismutase [Mn] 2	G5B5_07160	Metabolism	Inorganic ion transport and metabolism	K04564	P	23 kDa	0.002595	0.0023936	0.0023813	0.0021822	0.0020227	0.0022506	1	0.00245663	0.00215183	0.875928	-0.191116	3	3
hypothetical protein	G5B5_10005	unclassified	unclassified	-	-	9 kDa	0.0005226	0.00057844	0.00051154	0.0009766	0.00052003	0.00049445	0	0.000537527	0.000663693	1.23472	0.30418	3	3
hypothetical protein	G5B5_05420	unclassified	unclassified	-	-	15 kDa	0.00044214	0.00048939	0.00038641	0.00059018	0.00037711	0.0006723	0	0.000439313	0.00054653	1.24406	0.31505	3	3
hypothetical protein	G5B5_00760	unclassified	unclassified	-	-	17 kDa	0.00080866	0.0012787	0.0007774	0.0013493	0.00091963	0.0012979	0	0.00095492	0.00118894	1.24507	0.316228	3	3
hypothetical protein	G5B5_10450	unclassified	unclassified	-	-	17 kDa	0.00045907	0.00057164	0.00056169	0.00075064	0.00057101	0.00067865	0	0.0005308	0.000666767	1.25615	0.329014	3	3
hypothetical protein	G5B5_04000	unclassified	unclassified	-	-	17 kDa	0.00027961	0.00030948	0.00027369	0.00036576	0.00022258	0.00052909	0	0.000287593	0.000372477	1.29515	0.37312	3	3
hypothetical protein	G5B5_11615	unclassified	unclassified	-	-	27 kDa	0.00038631	0.00046646	0.00060157	0.00065628	0.00059408	0.00066454	0	0.00048478	0.0006383	1.31668	0.396904	3	3
hypothetical protein	G5B5_11805	unclassified	unclassified	-	-	16 kDa	0.00012027	0.00019968	0.00029431	0.00033713		0.00021336	0	0.000204753	0.000275245	1.34428	0.426829	3	2
Riboflavin biosynthesis protein RibBA	G5B5_01300	Metabolism	Coenzyme transport and metabolism	K02858,K14652	H	44 kDa	0.00025572	0.00028304	0.00026074	0.00023894	0.00021205	0.00025202	1	0.0002665	0.000234337	0.879312	-0.185553	3	3
hypothetical protein	G5B5_14970	unclassified	unclassified	-	-	11 kDa	0.0009562	0.00038486	0.00042544	0.00089345	0.000865	0.00071964	0	0.000588833	0.00082603	1.40282	0.488335	3	3
Glycogen phosphorylase	G5B5_13120	Metabolism	Carbohydrate transport and metabolism	K00688,K16153	G	64 kDa	0.00087797	0.0008545	0.00083345	0.00073548	0.00075314	0.0007877	1	0.000855307	0.000758773	0.887136	-0.172773	3	3
hypothetical protein	G5B5_03740	unclassified	unclassified	-	-	18 kDa	0.00016993	0.00012539		0.00026463	0.00016909	0.00020097	0	0.00014766	0.000211563	1.43277	0.518811	2	3
hypothetical protein	G5B5_01680	unclassified	unclassified	-	-	66 kDa	4.4567e-05	4.9329e-05	3.6353e-05	5.5523e-05	4.4347e-05	8.7846e-05	0	4.34163e-05	6.2572e-05	1.44121	0.527279	3	3
hypothetical protein	G5B5_07925	unclassified	unclassified	-	-	17 kDa	0.00016993	0.00031348	0.00020792	0.00031755	0.00022546	0.00046893	0	0.000230443	0.000337313	1.46376	0.549677	3	3
hypothetical protein	G5B5_05805	unclassified	unclassified	-	-	10 kDa	0.00061974	0.00022865	0.00050552	0.00057907	0.00071947	0.00073294	0	0.000451303	0.00067716	1.50045	0.585399	3	3
hypothetical protein	G5B5_13290	unclassified	unclassified	-	-	10 kDa	0.0039127	0.0020069	0.0022185	0.0031209	0.0043682	0.0047402	0	0.0027127	0.00407643	1.50272	0.587578	3	3
hypothetical protein	G5B5_16780	Poorly characterized	Function unknown	-	S	11 kDa	0.00066802			0.00071335	0.00066473	0.00079004	0	0.00066802	0.000722707	1.08186	0.113519	1	3
Glutamyl-tRNA(Gln) amidotransferase subunit A	G5B5_05610	Information storage and processing	Translation, ribosomal structure and biogenesis	K01457,K02433	J	67 kDa	0.00039459	0.00045235	0.00039659	0.0003687	0.00039265	0.00035	1	0.00041451	0.00037045	0.893706	-0.162128	3	3
hypothetical protein	G5B5_14430	Poorly characterized	Function unknown	-	S	55 kDa		3.9746e-05		5.0328e-05	3.5732e-05		0	3.9746e-05	4.303e-05	1.08262	0.114533	1	2
hypothetical protein	G5B5_04265	unclassified	unclassified	-	-	22 kDa	0.00017472	0.00014504	0.00021378	0.00036732	0.00026079	0.00020663	0	0.000177847	0.000278247	1.56453	0.64573	3	3
50S ribosomal protein L25	G5B5_08165	Information storage and processing	Translation, ribosomal structure and biogenesis	K02897	J	24 kDa	0.0015748	0.001656	0.0018305	0.001545	0.0015279	0.0015366	1	0.0016871	0.0015365	0.910734	-0.134898	3	3
hypothetical protein	G5B5_12005	unclassified	unclassified	-	-	24 kDa		8.998e-05	0.0001492	0.00026585	0.00012134		0	0.00011959	0.000193595	1.61882	0.694945	2	2
hypothetical protein	G5B5_05330	unclassified	unclassified	-	-	13 kDa	0.001951	0.0009967	0.0011936	0.0032253	0.0017921	0.0018637	0	0.00138043	0.0022937	1.66158	0.732555	3	3
S-adenosylmethionine synthase	G5B5_07040	Metabolism	Coenzyme transport and metabolism	K00789,K01992	H	43 kDa	0.0033394	0.003329	0.0032741	0.0031822	0.0029048	0.0030078	1	0.00331417	0.0030316	0.91474	-0.128567	3	3
hypothetical protein	G5B5_06010	unclassified	unclassified	-	-	8 kDa	0.0013413	0.00067485	0.00089519	0.0020509	0.0013347	0.0018748	0	0.000970447	0.00175347	1.80687	0.853489	3	3
hypothetical protein	G5B5_10940	unclassified	unclassified	-	-	72 kDa	6.7536e-05	7.4752e-05	6.6106e-05	7.5724e-05	8.0644e-05	7.9872e-05	1	6.94647e-05	7.87467e-05	1.13362	0.18094	3	3
hypothetical protein	G5B5_06305	unclassified	unclassified	-	-	30 kDa				6.2384e-05		7.8961e-05	0		7.06725e-05			0	2
hypothetical protein	G5B5_06710	unclassified	unclassified	-	-	40 kDa				6.6335e-05	4.7097e-05	8.3963e-05	0		6.57983e-05	on Mn		0	3
hypothetical protein	G5B5_11385	unclassified	unclassified	-	-	13 kDa				0.00014649	0.00023401		0		0.00019025			0	2
hypothetical protein	G5B5_12170	unclassified	unclassified	-	-	92 kDa		3.6215e-05	2.6689e-05				0	3.1452e-05				2	0
hypothetical protein	G5B5_01820	Cellular processing and signaling	Cell wall/membrane/envelope biogenesis	K16080	M	53 kDa	5.4759e-05	4.0407e-05	4.4667e-05				0	4.6611e-05		off Mn		3	0
hypothetical protein	G5B5_04460	Cellular processing and signaling	Cell cycle control, cell division, chromosome partitioning	-	D	11 kDa				0.00025636	0.00027301	0.00032448	0		0.000284617	on Mn		0	3
hypothetical protein	G5B5_09460	Poorly characterized	Function unknown	-	S	24 kDa			9.9928e-05		0.0001219	9.659e-05	0	9.9928e-05	0.000109245	1.09324	0.128606	1	2
hypothetical protein	G5B5_10235	Cellular processing and signaling	Defense mechanisms	K17837	V	33 kDa				5.5429e-05	5.903e-05		0		5.72295e-05			0	2
hypothetical protein	G5B5_10980	Cellular processing and signaling	Cell wall/membrane/envelope biogenesis	-	M	40 kDa					4.9639e-05	5.8996e-05	0		5.43175e-05			0	2
hypothetical protein	G5B5_14040	Cellular processing and signaling	Signal transduction mechanisms	-	T	33 kDa				5.2251e-05	5.5646e-05		0		5.39485e-05			0	2
hypothetical protein	G5B5_16565	Cellular processing and signaling	Intracellular trafficking, secretion, and vesicular transport	-	U	12 kDa	0.00031639	0.00035019					0	0.00033329				2	0
hypothetical protein	G5B5_06920	Information storage and processing	Transcription	-	K	12 kDa				0.00029562		0.00028063	0		0.000288125			0	2
hypothetical protein	G5B5_04810	Metabolism	Amino acid transport and metabolism	K01653	E	23 kDa				0.00011947	0.00021205	0.00025202	0		0.000194513	on Mn		0	3
hypothetical protein	G5B5_05370	Metabolism	Carbohydrate transport and metabolism	-	G	54 kDa				3.328e-05		4.2123e-05	0		3.77015e-05			0	2
hypothetical protein	G5B5_12705	Metabolism	Inorganic ion transport and metabolism	-	P	119 kDa	3.9908e-05	2.6503e-05					0	3.32055e-05				2	0
hypothetical protein	G5B5_12760	Metabolism	Inorganic ion transport and metabolism	-	P	125 kDa	6.0497e-05	6.6962e-05					0	6.37295e-05				2	0
hypothetical protein	G5B5_13605	Metabolism	Energy production and conversion	K00161	C	26 kDa				6.7797e-05	7.2202e-05		0		6.99995e-05			0	2
hypothetical protein	G5B5_00185	Poorly characterized	Function unknown	K06991	S	16 kDa				0.00017579		0.00014833	0		0.00016206			0	2
hypothetical protein	G5B5_00695	Poorly characterized	Function unknown	-	S	56 kDa				4.8067e-05	3.4127e-05		0		4.1097e-05			0	2
hypothetical protein	G5B5_02785	Poorly characterized	Function unknown	-	S	104 kDa				1.6967e-05	1.8069e-05		0		1.7518e-05			0	2
hypothetical protein	G5B5_04820	Poorly characterized	Function unknown	-	S	19 kDa				0.00020008	0.00021308		0		0.00020658			0	2
hypothetical protein	G5B5_05650	Poorly characterized	Function unknown	K06975	S	10 kDa				0.00027966	0.00029783	0.00035398	0		0.00031049	on Mn		0	3
hypothetical protein	G5B5_06295	Poorly characterized	Function unknown	-	S	67 kDa				0.00010975	4.3828e-05	3.4727e-05	0		6.27683e-05	on Mn		0	3
hypothetical protein	G5B5_07290	Poorly characterized	Function unknown	K06996	S	14 kDa	0.00062712	0.00046275	0.00034103				0	0.000476967		off Mn		3	0
hypothetical protein	G5B5_08045	Poorly characterized	Function unknown	-	S	87 kDa				4.2123e-05	2.243e-05		0		3.22765e-05			0	2
hypothetical protein	G5B5_08055	Poorly characterized	Function unknown	-	S	60 kDa					6.2965e-05	3.7418e-05	0		5.01915e-05			0	2
hypothetical protein	G5B5_15170	Poorly characterized	Function unknown	-	S	14 kDa				0.00019227	0.00013651	0.00016224	0		0.000163673	on Mn		0	3
hypothetical protein	G5B5_16020	Poorly characterized	Function unknown	K06603	S	12 kDa				0.00036953	0.00023612		0		0.000302825			0	2
hypothetical protein	G5B5_11890	unclassified	unclassified	-	-	11 kDa	0.00036205			0.00025372	0.00063047	0.00032114	0	0.00036205	0.000401777	1.10973	0.150205	1	3
hypothetical protein	G5B5_04790	unclassified	unclassified	-	-	11 kDa	0.00037762	0.00031348	0.00034653				0	0.000345877		off Mn		3	0
hypothetical protein	G5B5_15875	unclassified	unclassified	-	-	9 kDa	0.00075874		0.00066311				0	0.000710925				2	0
hypothetical protein	G5B5_16455	Poorly characterized	Function unknown	-	S	46 kDa	0.0040864	0.0047022	0.0041336	0.0048011	0.0049923	0.005407	1	0.0043074	0.0050668	1.1763	0.234258	3	3
Aspartyl/glutamyl-tRNA(Asn/Gln) amidotransferase subunit B	G5B5_09965	Information storage and processing	Translation, ribosomal structure and biogenesis	K02434	J	54 kDa	0.00044612	0.00051354	0.00054585	0.00056691	0.00060374	0.00061203	1	0.000501837	0.000594227	1.1841	0.243795	3	3
Imidazole glycerol phosphate synthase subunit HisH	G5B5_11395	Metabolism	Amino acid transport and metabolism	K02501	E	23 kDa	0.00012483	0.00013817	0.00015273	0.0001944	0.00012421	0.00014763	0	0.000138577	0.000155413	1.1215	0.165426	3	3
Imidazolonepropionase	G5B5_15155	Metabolism	Secondary metabolites biosynthesis, transport, and catabolism	-	Q	46 kDa	0.00028519	0.00031566	0.00022432	0.00024744	0.0002027	0.00019273	0	0.000275057	0.00021429	0.779076	-0.360164	3	3
Inorganic pyrophosphatase	G5B5_06235	Metabolism	Energy production and conversion	K01507	C	27 kDa	0.0007138	0.00075056	0.00030568	0.00023343	0.00042617	0.00063313	0	0.000590013	0.00043091	0.730339	-0.453361	3	3
dTDP-L-rhamnose 4-epimerase	G5B5_10985	Cellular processing and signaling	Cell wall/membrane/envelope biogenesis	K17947	M	41 kDa	0.00056041	0.00064613	0.0005714	0.00065453	0.00065059	0.00080085	1	0.000592647	0.00070199	1.1845	0.244278	3	3
Inositol 2-dehydrogenase/D-chiro-inositol 3-dehydrogenase	G5B5_06730	Poorly characterized	Function unknown	-	S	49 kDa	3.9371e-05	4.3578e-05	4.8172e-05	5.518e-05	3.9177e-05	6.9843e-05	0	4.3707e-05	5.47333e-05	1.25228	0.324555	3	3
Inositol-1-monophosphatase	G5B5_13665	Metabolism	Carbohydrate transport and metabolism	K01092	G	33 kDa	0.00023809	0.00036236	0.00040056	0.00019466	0.00020731	0.00028158	0	0.00033367	0.00022785	0.68286	-0.550338	3	3
Inosose dehydratase	G5B5_06610	Metabolism	Carbohydrate transport and metabolism	-	G	35 kDa	0.00013676	0.00024219	0.00023426	0.00043445	0.00035381	0.00019408	0	0.000204403	0.000327447	1.60196	0.679841	3	3
Iron-sulfur cluster assembly scaffold protein IscU	G5B5_10275	Metabolism	Energy production and conversion	K04488	C	15 kDa	0.0046109	0.0044744	0.0040187	0.0043083	0.0033312	0.0032868	0	0.004368	0.0036421	0.833814	-0.262202	3	3
Iron-sulfur cluster carrier protein	G5B5_05965	Cellular processing and signaling	Cell cycle control, cell division, chromosome partitioning	K03593	D	29 kDa	0.00015905		0.00023353	8.9168e-05	9.4961e-05	0.00015048	0	0.00019629	0.000111536	0.568222	-0.815473	2	3
Iron-sulfur cluster insertion protein ErpA	G5B5_05745	Poorly characterized	Function unknown	K13628	S	13 kDa	0.001089	0.0012806	0.0013324	0.0012083	0.0010836	0.0012074	0	0.001234	0.00116643	0.945246	-0.0812385	3	3
Isoaspartyl peptidase	G5B5_09265	Metabolism	Amino acid transport and metabolism	K01424,K13051	E	38 kDa	9.5173e-05		8.7336e-05	8.8927e-05	7.1028e-05	8.4418e-05	0	9.12545e-05	8.14577e-05	0.892643	-0.163845	2	3
hypothetical protein	G5B5_11855	Metabolism	Coenzyme transport and metabolism	K01719	H	64 kDa	3.0119e-05	5.0006e-05			4.4956e-05		0	4.00625e-05	4.4956e-05	1.12215	0.166261	2	1
Isochorismatase family protein YecD	G5B5_10690	Metabolism	Secondary metabolites biosynthesis, transport, and catabolism	-	Q	23 kDa	0.0010819	0.0011053	0.0022401	0.0012052	0.0008695	0.00098421	0	0.00147577	0.00101964	0.69092	-0.533409	3	3
Isochorismatase family protein YecD	G5B5_15910	Metabolism	Secondary metabolites biosynthesis, transport, and catabolism	-	Q	21 kDa	0.00045256	0.00050092	0.00055373	0.00054972	0.00045033	0.00042818	0	0.000502403	0.000476077	0.947599	-0.0776521	3	3
Isochorismate synthase MenF	G5B5_09765	unclassified	unclassified	K01665,K03342	E, H	66 kDa	5.9322e-05	3.283e-05		5.5429e-05	5.903e-05	3.5079e-05	0	4.6076e-05	4.9846e-05	1.08182	0.113462	2	3
Isocitrate dehydrogenase [NADP]	G5B5_03935	Metabolism	Energy production and conversion	K00030,K00052	C	37 kDa	0.00036258	0.000258	0.00025351	0.00031459	0.0003608	0.00024504	0	0.000291363	0.00030681	1.05302	0.0745262	3	3
Isoleucine--tRNA ligase	G5B5_01070	Information storage and processing	Translation, ribosomal structure and biogenesis	K01870	J	107 kDa	0.0011226	0.0016365	0.0014517	0.0014497	0.0014258	0.0008419	0	0.0014036	0.00123913	0.882825	-0.1798	3	3
Ketol-acid reductoisomerase (NADP(+))	G5B5_04815	Metabolism	Amino acid transport and metabolism	K00053	E	37 kDa	0.0042482	0.0047877	0.0053554	0.0041138	0.0048422	0.0029536	0	0.0047971	0.00396987	0.827556	-0.273072	3	3
KHG/KDPG aldolase	G5B5_03710	Metabolism	Carbohydrate transport and metabolism	K01625	G	23 kDa	0.00024164	0.00013373	0.00014783	0.00015052	0.00020038	0.00028578	0	0.0001744	0.000212227	1.2169	0.283206	3	3
hypothetical protein	G5B5_07835	unclassified	unclassified	-	-	23 kDa	0.0015123	0.0014414	0.0014392	0.0016878	0.0016302	0.0019872	1	0.0014643	0.0017684	1.20768	0.272233	3	3
Leucine--tRNA ligase	G5B5_06355	Information storage and processing	Translation, ribosomal structure and biogenesis	K01869	J	95 kDa	7.2218e-05	0.00022839	7.5739e-05	0.00011568	0.00011293	3.6604e-05	0	0.000125449	8.84047e-05	0.704706	-0.504907	3	3
L-glyceraldehyde 3-phosphate reductase	G5B5_09860	Metabolism	Energy production and conversion	K05882	C	39 kDa	0.00089851	0.0011366	0.0011308	0.00093548	0.00081745	0.0010019	0	0.0010553	0.000918277	0.870154	-0.200657	3	3
Lipoyl synthase	G5B5_07905	Metabolism	Coenzyme transport and metabolism	K03644	H	35 kDa					5.6364e-05	6.699e-05	0		6.1677e-05			0	2
L-methionine gamma-lyase	G5B5_03670	Metabolism	Amino acid transport and metabolism	K01758,K01760,K17217	E	43 kDa	0.00082659	0.0010385	0.001312	0.00079321	0.00097813	0.00066052	0	0.00105903	0.00081062	0.765436	-0.385646	3	3
Lon protease 1	G5B5_14910	Cellular processing and signaling	Post-translational modification, protein turnover, and chaperones	K01338	O	90 kDa	0.00060849	0.00091405	0.00061157	0.00082238	0.00071362	0.00047548	0	0.00071137	0.000670493	0.942538	-0.0853771	3	3
Lon protease 2	G5B5_16030	Cellular processing and signaling	Post-translational modification, protein turnover, and chaperones	K01338	O	90 kDa	0.00061254	0.00073746	0.00055224	0.00055225	0.00056675	0.00039398	0	0.00063408	0.000504327	0.795368	-0.330306	3	3
DNA-directed RNA polymerase subunit alpha	G5B5_05675	Information storage and processing	Transcription	K02600	K	60 kDa	0.00030664	0.00048232	0.00045418	0.00051272	0.00049785	0.00049626	1	0.00041438	0.000502277	1.21212	0.277528	3	3
Low specificity L-threonine aldolase	G5B5_12700	Metabolism	Amino acid transport and metabolism	K01620	E	37 kDa	0.00023104	0.00028415	0.00028269	0.00016791	0.00022991	0.00024289	0	0.00026596	0.00021357	0.803015	-0.3165	3	3
L-serine dehydratase TdcG	G5B5_05995	Metabolism	Amino acid transport and metabolism	K01752	E	54 kDa				6.4978e-05		6.1683e-05	0		6.33305e-05			0	2
L-threonine 3-dehydrogenase	G5B5_12425	Metabolism	Amino acid transport and metabolism	K00060,K00639	E	37 kDa	5.0027e-05	0.00011074	6.121e-05	7.0115e-05	4.978e-05	5.9165e-05	0	7.39923e-05	5.96867e-05	0.80666	-0.309967	3	3
L-threonine 3-dehydrogenase	G5B5_10220	Metabolism	Energy production and conversion	K00344	C	34 kDa	0.0005117	0.00047695	0.00049428	0.00032713	0.00056278	0.00041406	0	0.00049431	0.000434657	0.87932	-0.18554	3	3
hypothetical protein	G5B5_13225	Poorly characterized	Function unknown	K01759	S	14 kDa	0.00021071			0.00026251	0.00020967	0.0002492	0	0.00021071	0.00024046	1.14119	0.190538	1	3
L-threonine 3-dehydrogenase	G5B5_09565	Metabolism	Energy production and conversion	K00001,K00344	C	34 kDa	0.00018852	0.00023847	0.00019771	0.00017615	0.00024119	0.00022296	0	0.000208233	0.000213433	1.02497	0.0355845	3	3
L-threonine 3-dehydrogenase	G5B5_09070	Metabolism	Energy production and conversion	-	C	31 kDa	0.00097552	0.00092097	0.0010883	0.00099192	0.00097072	0.0013234	0	0.00099493	0.00109535	1.10093	0.138721	3	3
Transcription termination factor Rho	G5B5_06015	Information storage and processing	Transcription	K03628	K	47 kDa	0.00064343	0.00064326	0.00060949	0.00083392	0.00076418	0.00071186	1	0.00063206	0.000769987	1.21822	0.284772	3	3
L-threonine ammonia-lyase	G5B5_09130	Metabolism	Amino acid transport and metabolism	K01754	E	44 kDa	0.00025759	0.00030888	0.00015759	0.00020057	0.00019224	0.00027926	0	0.000241353	0.000224023	0.928197	-0.107498	3	3
hypothetical protein	G5B5_11970	unclassified	unclassified	-	-	42 kDa	0.0023681	0.0021513	0.0023234	0.0026927	0.0026676	0.003012	1	0.00228093	0.00279077	1.22352	0.291037	3	3
Outer membrane protein TolC	G5B5_06980	Cellular processing and signaling	Cell wall/membrane/envelope biogenesis	K12340	M	46 kDa			4.9052e-05	3.7459e-05	5.9839e-05	7.1119e-05	0	4.9052e-05	5.6139e-05	1.14448	0.194691	1	3
Lysine-sensitive aspartokinase 3	G5B5_03960	Metabolism	Amino acid transport and metabolism	K00928	E	51 kDa	3.6506e-05	8.0813e-05	4.4667e-05	5.1165e-05	5.4489e-05	4.3174e-05	0	5.39953e-05	4.96093e-05	0.918771	-0.122223	3	3
hypothetical protein	G5B5_06240	unclassified	unclassified	-	-	22 kDa	8.5656e-05	9.4808e-05		0.00012005		0.0001013	1	9.0232e-05	0.000110675	1.22656	0.294618	2	2
UDP-3-O-acylglucosamine N-acyltransferase	G5B5_01120	Cellular processing and signaling	Cell wall/membrane/envelope biogenesis	K02536	M	34 kDa			6.4518e-05	7.3905e-05			0	6.4518e-05	7.3905e-05	1.14549	0.19597	1	1
Macrolide export protein MacA	G5B5_06975	Cellular processing and signaling	Cell wall/membrane/envelope biogenesis	-	M	43 kDa	8.6713e-05	0.00014397	0.0001061	0.00010128	0.000151	0.00015383	0	0.000112261	0.00013537	1.20585	0.270051	3	3
Maf-like protein YhdE	G5B5_09250	Cellular processing and signaling	Cell cycle control, cell division, chromosome partitioning	K06287	D	22 kDa	8.9134e-05	0.00019732			8.8695e-05	0.00010541	0	0.000143227	9.70525e-05	0.677613	-0.561466	2	2
Malate dehydrogenase	G5B5_02915	Metabolism	Energy production and conversion	K00024	C	32 kDa	0.0012786	0.0012265	0.0014601	0.0013805	0.0014419	0.0013777	0	0.00132173	0.00140003	1.05924	0.08303	3	3
Malate synthase A	G5B5_01990	Metabolism	Energy production and conversion	K01638	C	60 kDa	0.00026208	0.00030821	0.00036075	0.0003061	0.00029339	0.00032932	0	0.000310347	0.000309603	0.997605	-0.00345965	3	3
Malonyl CoA-acyl carrier protein transacylase	G5B5_08405	Metabolism	Lipid transport and metabolism	K00645	I	38 kDa	0.00028865	0.00047924	0.0004709	0.00042703	0.00038297	0.00019913	0	0.00041293	0.000336377	0.814609	-0.29582	3	3
Malto-oligosyltrehalose trehalohydrolase	G5B5_03650	Metabolism	Carbohydrate transport and metabolism	K00700,K01176,K01236	G	65 kDa	0.00027342	0.00026901	0.00039029	0.00031224	0.00036276	0.00030539	0	0.000310907	0.000326797	1.05111	0.0719117	3	3
Melamine deaminase	G5B5_12550	Metabolism	Nucleotide transport and metabolism	-	F	52 kDa	5.4988e-05	0.00010144	0.00013456	8.5631e-05	0.00012767	0.00015174	0	9.6996e-05	0.00012168	1.25449	0.327099	3	3
Metalloprotease PmbA	G5B5_10630	Information storage and processing	Replication, recombination and repair	K03592	L	51 kDa		4.0491e-05	6.7139e-05	6.8362e-05	5.4603e-05		0	5.3815e-05	6.14825e-05	1.14248	0.192167	2	2
Metalloprotease TldD	G5B5_10650	Information storage and processing	Replication, recombination and repair	K03568	L	52 kDa	0.00010685	0.00013798	8.7159e-05	6.656e-05	8.8605e-05	4.2123e-05	0	0.000110663	6.57627e-05	0.594261	-0.750832	3	3
Methanesulfonate monooxygenase	G5B5_12150	Poorly characterized	Function unknown	K04091,K17228	S	40 kDa	0.00017167	0.00027145	0.00015003	0.00025206	0.00024403	0.00023203	0	0.000197717	0.000242707	1.22755	0.295779	3	3
hypothetical protein	G5B5_09035	Metabolism	Coenzyme transport and metabolism	K11754	H	10 kDa	0.00069054	0.00054595	0.0006035	0.00073739	0.00088346	0.0007	1	0.00061333	0.000773617	1.26134	0.334955	3	3
Methionine--tRNA ligase	G5B5_03125	Information storage and processing	Translation, ribosomal structure and biogenesis	K01874	J	94 kDa	0.00019352	0.00022547	0.00011216	0.00020937	0.00016216	0.00012046	0	0.00017705	0.000163997	0.926273	-0.11049	3	3
hypothetical protein	G5B5_08320	Cellular processing and signaling	Cell wall/membrane/envelope biogenesis	K06142	M	22 kDa	0.0026257	0.0037691	0.0041162	0.0045234	0.0041233	0.004658	1	0.00350367	0.0044349	1.26579	0.340036	3	3
Monofunctional biosynthetic peptidoglycan transglycosylase	G5B5_03370	Cellular processing and signaling	Cell wall/membrane/envelope biogenesis	K05365	M	95 kDa	1.9999e-05	3.3204e-05	2.447e-05	2.803e-05	2.9851e-05		0	2.5891e-05	2.89405e-05	1.11778	0.160639	3	2
Multidrug resistance protein MdtA	G5B5_03695	Cellular processing and signaling	Defense mechanisms	-	V	44 kDa		4.7404e-05	7.8602e-05	6.0025e-05	4.2617e-05	0.0001013	0	6.3003e-05	6.79807e-05	1.07901	0.109704	2	3
Multidrug resistance protein MdtE	G5B5_12860	Cellular processing and signaling	Defense mechanisms	K03585	V	41 kDa	8.846e-05	7.3434e-05	8.1176e-05		8.8025e-05	5.2309e-05	0	8.10233e-05	7.0167e-05	0.86601	-0.207545	3	2
Multidrug/solvent efflux pump outer membrane protein MepC	G5B5_02430	Cellular processing and signaling	Cell wall/membrane/envelope biogenesis	-	M	55 kDa	0.0012175	0.00064532	0.0012589	0.00075305	0.00058016	0.00097344	0	0.00104057	0.000768883	0.738904	-0.436542	3	3
Multifunctional CCA protein	G5B5_01135	Information storage and processing	Translation, ribosomal structure and biogenesis	K00970,K00974	J	65 kDa	5.7952e-05	0.00030468	0.00023045	8.1222e-05	7.2083e-05	0.00020561	0	0.000197694	0.000119638	0.605169	-0.724589	3	3
tRNA (guanine-N(1)-)-methyltransferase	G5B5_16515	Information storage and processing	Translation, ribosomal structure and biogenesis	K00554,K01770	J	31 kDa		0.00010229		0.00011514	0.00012262		0	0.00010229	0.00011888	1.16219	0.216841	1	2
Multifunctional non-homologous end joining protein LigD	G5B5_03640	Information storage and processing	Replication, recombination and repair	K01971	L	35 kDa				5.1432e-05	5.4774e-05		0		5.3103e-05			0	2
Multifunctional non-homologous end joining protein LigD	G5B5_03795	Information storage and processing	Replication, recombination and repair	K01971	L	68 kDa				3.9952e-05	8.5095e-05		0		6.25235e-05			0	2
Mycothiol S-conjugate amidase	G5B5_16495	Poorly characterized	Function unknown	K18455	S	27 kDa	0.00053974	0.00067706	0.0011887	0.00050431	0.00060869	0.00051066	0	0.000801833	0.00054122	0.674978	-0.567087	3	3
Alkyl hydroperoxide reductase C	G5B5_12875	Cellular processing and signaling	Post-translational modification, protein turnover, and chaperones	K03386	O	24 kDa	0.0019331	0.0019614	0.0020203	0.0027094	0.0024045	0.0024291	1	0.0019716	0.00251433	1.27528	0.350809	3	3
N,N'-diacetyllegionaminic acid synthase	G5B5_15950	Cellular processing and signaling	Cell wall/membrane/envelope biogenesis	K01654,K05304	M	32 kDa	0.00012068	0.00013358	0.00014766	0.00022553	0.00018013	0.00014273	0	0.000133973	0.000182797	1.36443	0.448294	3	3
N5-carboxyaminoimidazole ribonucleotide mutase	G5B5_01635	Metabolism	Nucleotide transport and metabolism	K01588	F	18 kDa	0.00047034	0.00057844	0.00038365	0.00058596	0.00078004	0.00043264	0	0.000477477	0.000599547	1.25566	0.328442	3	3
Na(+)-translocating NADH-quinone reductase subunit F	G5B5_10190	Metabolism	Energy production and conversion	K04755	C	18 kDa	0.0010975	0.00086766	0.00089519	0.0010254	0.00072804	0.00067986	0	0.00095345	0.0008111	0.8507	-0.233277	3	3
N-acetyl-alpha-D-glucosaminyl L-malate deacetylase 1	G5B5_03180	Poorly characterized	Function unknown	-	S	27 kDa	0.00071671	0.00059497	0.00092077	0.00070315	0.00057054	0.00089	0	0.00074415	0.00072123	0.9692	-0.0451341	3	3
Replicative DNA helicase	G5B5_07295	Information storage and processing	Replication, recombination and repair	K02314	L	51 kDa		4.1887e-05		5.304e-05		4.4756e-05	0	4.1887e-05	4.8898e-05	1.16738	0.223273	1	2
DNA gyrase inhibitor YacG	G5B5_05880	Poorly characterized	Function unknown	K09862	S	9 kDa	0.00033768	0.00049835	0.00041317	0.00052586	0.00056003	0.00053248	1	0.0004164	0.000539457	1.29553	0.373537	3	3
N-acetylgalactosamine-6-phosphate deacetylase	G5B5_04325	Metabolism	Carbohydrate transport and metabolism	K01443	G	45 kDa	0.00010185	9.0189e-05	9.9697e-05	9.5168e-05	0.00012162	9.6365e-05	0	9.72453e-05	0.000104384	1.07341	0.102204	3	3
DNA repair protein RecO	G5B5_13675	Information storage and processing	Replication, recombination and repair	K03584	L	30 kDa	9.8648e-05		0.0001207	0.00015362	0.00013088		1	0.000109674	0.00014225	1.29703	0.375207	2	2
N-acetylglucosamine repressor	G5B5_01610	unclassified	unclassified	K00845	G, K	46 kDa	0.00032821	0.0004541	0.00030119	0.00038334	0.00034701	0.00050946	0	0.000361167	0.00041327	1.14426	0.19442	3	3
Chromosome partition protein Smc	G5B5_11725	Cellular processing and signaling	Cell wall/membrane/envelope biogenesis	K03286	M	55 kDa	0.0012128	0.00121	0.0014212	0.0016279	0.0015127	0.0018989	1	0.00128133	0.00167983	1.311	0.390672	3	3
N-acetylmuramic acid 6-phosphate etherase	G5B5_02295	Information storage and processing	Transcription	K07106	K	34 kDa	0.00013848	0.00015328	0.00016944	0.00015527	0.00016536	0.00013102	0	0.000153733	0.00015055	0.979293	-0.0301873	3	3
N-acetylmuramic acid 6-phosphate etherase	G5B5_10050	Information storage and processing	Transcription	K07106	K	31 kDa	5.7952e-05	0.00016036	0.00010636	0.00013537	0.00014417	0.00017134	0	0.000108224	0.000150293	1.38872	0.473761	3	3
putative protein	G5B5_02965	Poorly characterized	Function unknown	-	S	48 kDa	0.0001168	0.00010774	0.00011909	0.00016371	0.00015497	0.00013814	1	0.000114543	0.000152273	1.32939	0.41077	3	3
NAD(P)H azoreductase	G5B5_14505	Poorly characterized	Function unknown	-	S	32 kDa	9.0202e-05	0.00013312	7.3577e-05	0.00011238	8.9758e-05	0.00010668	0	9.89663e-05	0.000102939	1.04014	0.0567846	3	3
NAD(P)H-quinone oxidoreductase subunit K, chloroplastic	G5B5_15975	Metabolism	Energy production and conversion	K00331	C	22 kDa	0.0004325	0.00052658	0.00063501	0.00040411	0.00055948	0.0005115	0	0.000531363	0.000491697	0.925349	-0.11193	3	3
hypothetical protein	G5B5_07445	unclassified	unclassified	-	-	9 kDa	0.00021678					0.00025638	0	0.00021678	0.00025638	1.18267	0.242052	1	1
hypothetical protein	G5B5_11585	Poorly characterized	Function unknown	-	S	40 kDa			6.0691e-05	6.9521e-05	7.4038e-05		0	6.0691e-05	7.17795e-05	1.1827	0.242089	1	2
NAD/NADP-dependent betaine aldehyde dehydrogenase	G5B5_15770	Metabolism	Energy production and conversion	K00128,K00138,K00146	C	86 kDa	0.00054805	0.00058234	0.00065714	0.00047111	0.0006217	0.00053148	0	0.000595843	0.00054143	0.908678	-0.138158	3	3
NAD-dependent dihydropyrimidine dehydrogenase subunit PreA	G5B5_02015	Metabolism	Nucleotide transport and metabolism	K00226,K00254,K17723,K17828	F	51 kDa	0.00031689	0.00039201	0.00036492	0.00034834	0.00022258	0.00022045	0	0.00035794	0.00026379	0.736967	-0.440328	3	3
NADH dehydrogenase-like protein YjlD	G5B5_11285	Metabolism	Energy production and conversion	K03885	C	50 kDa		4.2622e-05	4.7115e-05	5.397e-05	3.8318e-05	0.00011385	0	4.48685e-05	6.87127e-05	1.53142	0.614873	2	3
NADH-quinone oxidoreductase chain 5	G5B5_01855	Metabolism	Energy production and conversion	K00332	C	19 kDa	0.00041808	0.00069413	0.00025577	0.00058596	0.00052003	0.00049445	0	0.000455993	0.00053348	1.16993	0.226421	3	3
NADH-quinone oxidoreductase subunit 4	G5B5_01860	Metabolism	Energy production and conversion	K00333	C	48 kDa	0.0003701	0.00043241	0.00032705	0.00026897	0.00045012	0.00043771	0	0.00037652	0.0003856	1.02412	0.0343786	3	3
NADH-quinone oxidoreductase subunit 9	G5B5_02475	Metabolism	Energy production and conversion	K00338	C	18 kDa	0.00021284	0.00041227	0.00019531	0.00029831	0.00015884	0.00025172	0	0.000273473	0.00023629	0.864033	-0.210842	3	3
NADH-quinone oxidoreductase subunit E	G5B5_01875	Metabolism	Energy production and conversion	K00127,K00334,K05586,K18330	C	19 kDa	0.0014027	0.0015526	0.0012077	0.0012135	0.00087881	0.0012288	0	0.00138767	0.00110704	0.797768	-0.325958	3	3
NADH-quinone oxidoreductase subunit F	G5B5_01880	Metabolism	Energy production and conversion	K00334,K00335	C	48 kDa	0.001404	0.0015321	0.00089519	0.0012564	0.0012396	0.0013096	0	0.0012771	0.00126853	0.993295	-0.0097063	3	3
NADP-dependent 3-hydroxy acid dehydrogenase YdfG	G5B5_11720	Poorly characterized	Function unknown	K05886,K15373,K16066	S	27 kDa	0.00044239	0.00030133	0.00045801	0.00038156	0.00040635	0.00048295	0	0.000400577	0.00042362	1.05753	0.0806923	3	3
NADP-dependent alcohol dehydrogenase C 1	G5B5_11690	Metabolism	Energy production and conversion	K13979	C	37 kDa	0.0022772	0.0020164	0.0018575	0.0019149	0.0021904	0.0017056	0	0.00205037	0.00193697	0.944693	-0.0820828	3	3
NADPH-dependent 7-cyano-7-deazaguanine reductase	G5B5_13415	Poorly characterized	Function unknown	K06879,K09457	S	16 kDa	0.00076902	0.001064	0.00054888	0.00071855	0.00076524	0.00068212	0	0.000793967	0.00072197	0.90932	-0.13714	3	3
NADPH-Fe(3+) oxidoreductase subunit alpha	G5B5_01885	Metabolism	Energy production and conversion	K00123,K00336,K05299	C	84 kDa	0.0017762	0.0028867	0.0026546	0.002815	0.0021142	0.0022336	0	0.00243917	0.0023876	0.978859	-0.0308272	3	3
hypothetical protein	G5B5_07305	Poorly characterized	Function unknown	-	S	31 kDa	6.0135e-05			8.4282e-05	5.9839e-05	7.1119e-05	0	6.0135e-05	7.17467e-05	1.19309	0.254707	1	3
N-carbamoyl-L-amino acid hydrolase	G5B5_05500	Metabolism	Amino acid transport and metabolism	K02083,K06016	E	44 kDa	4.2724e-05	4.7289e-05	5.2274e-05	3.992e-05	4.2513e-05		0	4.7429e-05	4.12165e-05	0.869015	-0.202547	3	2
Negative regulator of genetic competence ClpC/MecB	G5B5_14980	Cellular processing and signaling	Post-translational modification, protein turnover, and chaperones	K03696	O	93 kDa	3.1926e-05	7.0675e-05		8.9492e-05	0.00012708	5.0344e-05	0	5.13005e-05	8.8972e-05	1.73433	0.794378	2	3
N-ethylmaleimide reductase	G5B5_13690	Metabolism	Energy production and conversion	K10680,K15552	C	38 kDa	0.00035119	0.00033318	0.00033762	0.00021095	0.00034946	0.000178	0	0.000340663	0.000246137	0.722522	-0.468887	3	3
N-ethylmaleimide reductase	G5B5_15555	Metabolism	Energy production and conversion	K09461,K10680,K15552	C	37 kDa	0.0013081	0.0013644	0.0016006	0.0012458	0.0013768	0.0011603	0	0.00142437	0.00126097	0.885282	-0.17579	3	3
Neutral endopeptidase	G5B5_03870	Cellular processing and signaling	Post-translational modification, protein turnover, and chaperones	K01415,K07386	O	77 kDa	0.00010034	0.00011106	0.0001995	0.00016407	0.00013729	7.4167e-05	0	0.000136967	0.000125176	0.913913	-0.129871	3	3
Neutral endopeptidase	G5B5_07455	Cellular processing and signaling	Post-translational modification, protein turnover, and chaperones	K01415,K07386	O	77 kDa	0.00033083	0.00033801	0.00032694	0.00033289	0.00027855	0.00031602	0	0.000331927	0.000309153	0.93139	-0.102542	3	3
Neutral endopeptidase	G5B5_05840	Cellular processing and signaling	Post-translational modification, protein turnover, and chaperones	K01389,K01415,K07386	O	75 kDa	0.00033422	0.00028456	0.00023592	0.00026424	0.0002942	0.00025844	0	0.0002849	0.000272293	0.955751	-0.065294	3	3
Nicotinamidase	G5B5_04935	Metabolism	Coenzyme transport and metabolism	K08281	H	23 kDa	0.00016334	0.0001808	0.00019986	0.00026709	0.00024381	0.00014488	0	0.000181333	0.000218593	1.20548	0.269605	3	3
Nicotinate dehydrogenase FAD-subunit	G5B5_06110	Metabolism	Nucleotide transport and metabolism	K03519,K13479	F	31 kDa	0.00018484	0.00013639	0.00018846	0.0001727	0.00018393	0.0001093	0	0.000169897	0.00015531	0.914144	-0.129507	3	3
Tyrosine--tRNA ligase	G5B5_08225	Information storage and processing	Translation, ribosomal structure and biogenesis	K01866	J	47 kDa		4.5517e-05	5.0315e-05	5.7636e-05			0	4.7916e-05	5.7636e-05	1.20285	0.266463	2	1
Nicotinate phosphoribosyltransferase	G5B5_04555	Metabolism	Coenzyme transport and metabolism	K00763	H	51 kDa	0.00011732	4.3287e-05	7.1775e-05	0.00010962	9.7288e-05	0.00011563	0	7.74607e-05	0.000107513	1.38796	0.472971	3	3
Non-heme chloroperoxidase	G5B5_02255	Poorly characterized	Function unknown	K00433	S	30 kDa	0.00035376	0.00032037	0.00043284	0.00057094	0.00054403	0.00038034	0	0.00036899	0.000498437	1.35081	0.433828	3	3
Nucleoid occlusion factor SlmA	G5B5_07390	Information storage and processing	Transcription	-	K	23 kDa				8.0426e-05	8.5652e-05	0.0001527	0		0.000106259	on Mn		0	3
30S ribosomal protein S9	G5B5_06935	Information storage and processing	Translation, ribosomal structure and biogenesis	K02996	J	14 kDa	0.0080425	0.0089018	0.0058222	0.0090176	0.010937	0.010383	1	0.00758883	0.0101125	1.33255	0.414194	3	3
Glutamate dehydrogenase	G5B5_11630	Metabolism	Amino acid transport and metabolism	K00261,K00262	E	50 kDa	0.00095848	0.00095481	0.00089128	0.0012359	0.0011827	0.0013603	1	0.000934857	0.00125963	1.34741	0.430187	3	3
Octanoyltransferase	G5B5_09400	Metabolism	Coenzyme transport and metabolism	K03801	H	24 kDa	0.00027437	0.00034707	0.00047957	0.00036623	0.00019501	0.00023177	0	0.000367003	0.000264337	0.720257	-0.473417	3	3
L-threonine 3-dehydrogenase	G5B5_15815	Metabolism	Energy production and conversion	K00344	C	34 kDa	0.00013633	0.00021126	0.00023353	0.00025477	0.00027132	0.00025797	1	0.000193707	0.000261353	1.34922	0.432128	3	3
Oligo-1,6-glucosidase	G5B5_08075	Metabolism	Carbohydrate transport and metabolism	K01187,K05343	G	69 kDa	2.8185e-05	3.1197e-05	3.4486e-05	6.5838e-05	7.0116e-05	3.3333e-05	0	3.12893e-05	5.6429e-05	1.80346	0.850766	3	3
hypothetical protein	G5B5_15955	Poorly characterized	Function unknown	-	S	14 kDa		0.00047793	0.00035221	0.00067242	0.00050127	0.00051066	1	0.00041507	0.00056145	1.35266	0.435803	2	3
Organic hydroperoxide resistance protein OhrB	G5B5_03200	Cellular processing and signaling	Post-translational modification, protein turnover, and chaperones	-	O	15 kDa	0.0003736	0.00082705	0.00030475	0.00040726	0.00024784	0.00051549	0	0.0005018	0.000390197	0.777594	-0.362911	3	3
hypothetical protein	G5B5_11575	unclassified	unclassified	-	-	18 kDa	0.00063852	0.00053006	0.00045573	0.00079549	0.00068833	0.00075515	1	0.000541437	0.000746323	1.37841	0.463008	3	3
Orotate phosphoribosyltransferase	G5B5_13075	Metabolism	Nucleotide transport and metabolism	K00762,K13421	F	23 kDa	8.2053e-05	0.00018164	0.0001004	0.000115		0.00019408	0	0.000121364	0.00015454	1.27336	0.348636	3	2
Orotidine 5'-phosphate decarboxylase	G5B5_13080	Metabolism	Nucleotide transport and metabolism	K01591,K13421	F	30 kDa	0.00028944	0.00024917	0.00031479	0.00021035	0.00035202	0.00026624	0	0.000284467	0.000276203	0.970951	-0.0425289	3	3
Quinolinate synthase A	G5B5_06555	Metabolism	Coenzyme transport and metabolism	K03517	H	48 kDa	7.9275e-05	0.00010968	0.00012124	0.00012963	0.00015777	0.00014063	1	0.000103398	0.000142677	1.37987	0.464536	3	3
Outer membrane protein assembly factor BamA	G5B5_07570	Cellular processing and signaling	Cell wall/membrane/envelope biogenesis	K07277,K11749	M	117 kDa	0.00033768	0.00034641	0.00026201	0.00027704	0.00033602	0.00017533	0	0.000315367	0.000262797	0.833305	-0.263083	3	3
Outer membrane protein assembly factor BamD	G5B5_10610	Cellular processing and signaling	Cell wall/membrane/envelope biogenesis	K05807	M	68 kDa	0.00034403	0.00086821	0.00084187	0.00099007	0.0010681	0.00061845	0	0.000684703	0.000892207	1.30306	0.381899	3	3
Outer membrane protein assembly factor BamD	G5B5_00655	Poorly characterized	Function unknown	-	S	35 kDa	0.0015573	0.0017534	0.0017083	0.0017561	0.001603	0.0013654	0	0.001673	0.00157483	0.941323	-0.0872383	3	3
Outer membrane protein assembly factor BamD	G5B5_11790	unclassified	unclassified	-	-	39 kDa		8.2354e-05	0.00012138	0.00011587	7.4038e-05	5.8663e-05	0	0.000101867	8.2857e-05	0.813384	-0.297991	2	3
Outer-membrane lipoprotein carrier protein	G5B5_04315	Cellular processing and signaling	Cell wall/membrane/envelope biogenesis	K03634	M	24 kDa	0.00020418	0.0002712	0.00024982	0.00015262	0.00020317	0.00024147	0	0.000241733	0.000199087	0.82358	-0.28002	3	3
Oxalate decarboxylase OxdC	G5B5_10370	Metabolism	Carbohydrate transport and metabolism	K01569	G	47 kDa	6.212e-05	4.5839e-05	5.0671e-05	9.6739e-05	4.121e-05		0	5.28767e-05	6.89745e-05	1.30444	0.383432	3	2
Ornithine carbamoyltransferase	G5B5_02615	Metabolism	Amino acid transport and metabolism	K00611,K09065,K13252	E	38 kDa	7.504e-05	0.00024917	0.00024484	0.00025709	0.00027379	0.00026624	1	0.000189683	0.000265707	1.40079	0.486242	3	3
Oxidoreductase UcpA	G5B5_06265	Poorly characterized	Function unknown	-	S	26 kDa	0.00021071	7.7743e-05	0.00021485	6.5628e-05	0.00013978	0.00016613	0	0.000167768	0.000123846	0.738199	-0.437917	3	3
Pantothenate synthetase	G5B5_00455	Metabolism	Coenzyme transport and metabolism	K01918	H	31 kDa	0.00021717	0.00030905	0.00026571	0.00020291	0.00024697	0.00029352	0	0.000263977	0.0002478	0.938719	-0.0912342	3	3
Pca regulon regulatory protein	G5B5_02770	Information storage and processing	Transcription	K02624	K	31 kDa	0.00034006	0.00030796	0.00056738	0.00057771	0.00039991	0.00036561	0	0.000405133	0.000447743	1.10518	0.144275	3	3
Peptide chain release factor 1	G5B5_08750	Information storage and processing	Translation, ribosomal structure and biogenesis	K02835	J	40 kDa	0.00012366	0.00013687	0.0001513	0.00025419	4.9219e-05	0.00026324	0	0.000137277	0.000188883	1.37593	0.460406	3	3
Peptide methionine sulfoxide reductase MsrA	G5B5_07530	Cellular processing and signaling	Post-translational modification, protein turnover, and chaperones	K07304	O	28 kDa	0.00058994	0.00046092	0.00080673	0.00068092	0.00072516	0.00061561	0	0.000619197	0.000673897	1.08834	0.12213	3	3
Peptide methionine sulfoxide reductase MsrB	G5B5_09735	Cellular processing and signaling	Post-translational modification, protein turnover, and chaperones	K07305	O	15 kDa	0.00039908	0.00029448	0.00048829	0.00043503	0.0004633	0.00031465	0	0.00039395	0.000404327	1.02634	0.0375088	3	3
Peptidyl-prolyl cis-trans isomerase B	G5B5_02905	Cellular processing and signaling	Post-translational modification, protein turnover, and chaperones	K01802,K03767,K12733	O	18 kDa	0.0029788	0.0035863	0.0031332	0.0029786	0.0024961	0.0031521	0	0.00323277	0.0028756	0.889517	-0.168906	3	3
Peroxiredoxin OsmC	G5B5_08810	Cellular processing and signaling	Post-translational modification, protein turnover, and chaperones	K04063	O	15 kDa	0.0035861	0.0043799	0.0035556	0.0034663	0.0036915	0.0039486	0	0.00384053	0.00370213	0.963963	-0.0529498	3	3
Phenylalanine--tRNA ligase alpha subunit	G5B5_08420	Information storage and processing	Translation, ribosomal structure and biogenesis	K01889	J	41 kDa	7.0995e-05	0.00023574	0.00020269	0.00019901	0.00014129	0.0002239	0	0.000169808	0.000188067	1.10752	0.147337	3	3
Phenylalanine--tRNA ligase beta subunit	G5B5_08445	Information storage and processing	Translation, ribosomal structure and biogenesis	K01890	J	73 kDa	0.00016518	0.00033752	0.0004042	0.00032054	0.00032872	0.00040572	0	0.0003023	0.00035166	1.16328	0.2182	3	3
Phosphate acyltransferase	G5B5_12200	Metabolism	Lipid transport and metabolism	K03621	I	36 kDa	0.00015632	0.00017302	0.00012751	7.3028e-05	0.00012962	0.00012324	0	0.000152283	0.000108629	0.713337	-0.487344	3	3
hypothetical protein	G5B5_07545	Poorly characterized	Function unknown	-	S	65 kDa	4.368e-05			5.4418e-05			0	4.368e-05	5.4418e-05	1.24583	0.317111	1	1
Protein TolB	G5B5_00665	Cellular processing and signaling	Intracellular trafficking, secretion, and vesicular transport	K03641	U	48 kDa	0.00033168	0.00030233	0.00033421	0.00041929	0.0004077	0.00053071	1	0.00032274	0.000452567	1.40226	0.487758	3	3
Translation initiation factor IF-3	G5B5_08235	Information storage and processing	Translation, ribosomal structure and biogenesis	K02520	J	20 kDa	0.00079364	0.00076864	0.00078898	0.00083425	0.0011352	0.0013493	1	0.000783753	0.00110625	1.41148	0.497206	3	3
Phosphoadenosine phosphosulfate reductase	G5B5_12810	Metabolism	Inorganic ion transport and metabolism	K00390	P	27 kDa		0.00012147	8.9519e-05				0	0.000105494				2	0
hypothetical protein	G5B5_13205	unclassified	unclassified	-	-	48 kDa	0.00017677	0.00015218	0.00016822	0.00025693	0.00019545	0.00025552	1	0.000165723	0.000235967	1.42386	0.509806	3	3
Phosphoglucomutase	G5B5_04615	Metabolism	Carbohydrate transport and metabolism	K01835	G	61 kDa	0.0011364	0.00089597	0.0010095	0.00093089	0.00075902	0.00082846	0	0.00101396	0.000839457	0.827902	-0.272468	3	3
Phosphoglucosamine mutase	G5B5_11030	Metabolism	Carbohydrate transport and metabolism	K01840,K15778	G	52 kDa	0.00067677	0.00058712	0.0005595	0.00047854	0.00056423	0.00056243	0	0.000607797	0.000535067	0.880338	-0.18387	3	3
Phosphoglucosamine mutase	G5B5_11600	Metabolism	Carbohydrate transport and metabolism	K03431	G	47 kDa	0.00076773	0.0007844	0.0006744	0.00062538	0.0008423	0.00076828	0	0.000742177	0.00074532	1.00424	0.00609733	3	3
Phosphoglycolate phosphatase	G5B5_01295	Poorly characterized	Function unknown	K07025	S	25 kDa				7.424e-05	0.00011859		0		9.6415e-05			0	2
Phosphomethylpyrimidine synthase	G5B5_13630	Metabolism	Coenzyme transport and metabolism	K03147	H	55 kDa	0.001838	0.0018567	0.0016594	0.0014506	0.0016159	0.0016884	0	0.0017847	0.00158497	0.888086	-0.171229	3	3
Phosphopantetheine adenylyltransferase	G5B5_02575	Metabolism	Coenzyme transport and metabolism	K00954	H	19 kDa	0.00213	0.0018401	0.0015891	0.0021358	0.0014475	0.0018432	0	0.00185307	0.00180883	0.97613	-0.0348553	3	3
Phosphoribosyl 1,2-cyclic phosphate phosphodiesterase	G5B5_02500	Poorly characterized	Function unknown	K06167	S	22 kDa	0.00021004	0.00018599	0.00046259	0.00019626	0.00025081	0.00019872	0	0.000286207	0.000215263	0.752126	-0.410955	3	3
Phosphoribosylamine--glycine ligase	G5B5_01645	Metabolism	Nucleotide transport and metabolism	K01945	F	47 kDa	0.00019954	8.8344e-05	0.00014649	0.00014915	0.0001787	0.00023599	0	0.000144791	0.000187947	1.29805	0.376348	3	3
Phosphoribosylaminoimidazole-succinocarboxamide synthase	G5B5_01650	Metabolism	Nucleotide transport and metabolism	K01923	F	37 kDa	5.4532e-05	0.00012072	0.00010008	7.643e-05	8.1396e-05		0	9.17773e-05	7.8913e-05	0.859831	-0.217875	3	2
hypothetical protein	G5B5_00660	Cellular processing and signaling	Cell wall/membrane/envelope biogenesis	K03640	M	28 kDa	0.0001017	0.00011256			0.00013493		0	0.00010713	0.00013493	1.2595	0.332849	2	1
Phosphoribosyl-AMP cyclohydrolase	G5B5_11440	Metabolism	Amino acid transport and metabolism	K01496,K11755	E	12 kDa	0.00063277		0.00067744	0.00066515	0.00062965	0.00065481	0	0.000655105	0.00064987	0.992009	-0.011575	2	3
Phosphoribosylformylglycinamidine cyclo-ligase	G5B5_01655	Metabolism	Nucleotide transport and metabolism	K01933	F	31 kDa	9.1139e-05	0.0001345	0.00026019	0.00031224	0.00033253	0.00014371	0	0.000161943	0.000262827	1.62296	0.698626	3	3
Phosphoribosylformylglycinamidine synthase	G5B5_01660	Metabolism	Nucleotide transport and metabolism	K01952	F	138 kDa	0.00053526	0.00090023	0.00060388	0.0008184	0.00091999	0.0009701	0	0.00067979	0.00090283	1.3281	0.409365	3	3
Photosystem I assembly protein Ycf3	G5B5_08560	Poorly characterized	Function unknown	-	S	30 kDa	0.0016139	0.0016077	0.0015008	0.0015382	0.0014132	0.0014888	0	0.00157413	0.00148007	0.940242	-0.0888956	3	3
PKHD-type hydroxylase	G5B5_07465	Poorly characterized	Function unknown	K07336	S	26 kDa	0.0010642	0.00096758	0.0011161	0.00088782	0.00098332	0.0014384	0	0.00104929	0.00110318	1.05136	0.0722502	3	3
PhoH-like protein	G5B5_03845	Cellular processing and signaling	Signal transduction mechanisms	K06217	T	38 kDa		5.6829e-05		7.196e-05			0	5.6829e-05	7.196e-05	1.26625	0.340568	1	1
Polyphenol oxidase	G5B5_11825	Poorly characterized	Function unknown	K05810	S	30 kDa	0.00031582	0.00041947	0.00050234	0.00044263	0.00028283	0.00018675	0	0.000412543	0.00030407	0.737062	-0.440142	3	3
Polyribonucleotide nucleotidyltransferase	G5B5_12310	Information storage and processing	Translation, ribosomal structure and biogenesis	K02945,K03527	J	72 kDa	0.00062333	0.00077801	0.00050304	0.00065677	0.00071264	0.00040781	0	0.000634793	0.000592407	0.933228	-0.0996991	3	3
Polyribonucleotide nucleotidyltransferase	G5B5_00500	Information storage and processing	Translation, ribosomal structure and biogenesis	K00962	J	89 kDa	0.001569	0.0029379	0.0027743	0.0028416	0.0024702	0.0019953	0	0.00242707	0.0024357	1.00356	0.00512271	3	3
Porphobilinogen deaminase	G5B5_15700	Metabolism	Coenzyme transport and metabolism	K01749	H	36 kDa	0.00020719	0.00022933	0.00015844	0.00019359	0.00015463	0.00015315	0	0.00019832	0.000167123	0.842695	-0.246917	3	3
P-protein	G5B5_05770	Metabolism	Amino acid transport and metabolism	K04518,K14170	E	32 kDa				0.00013811	0.00011766	0.00013984	0		0.00013187	on Mn		0	3
Proline dehydrogenase 1	G5B5_06400	Metabolism	Amino acid transport and metabolism	K00249,K00318	E	34 kDa	5.7761e-05	6.3933e-05	7.0673e-05	5.397e-05	8.6215e-05	6.8312e-05	0	6.41223e-05	6.9499e-05	1.08385	0.116165	3	3
Proline--tRNA ligase	G5B5_03365	Information storage and processing	Translation, ribosomal structure and biogenesis	K01881	J	68 kDa	0.00091602	0.00090471	0.0009656	0.00096124	0.0007853	0.0010333	0	0.000928777	0.000926613	0.997671	-0.00336429	3	3
Prolyl tripeptidyl peptidase	G5B5_08530	Metabolism	Amino acid transport and metabolism	-	E	87 kDa	0.00063115	0.00096055	0.00066191	0.00067397	0.00078505	0.00037321	0	0.000751203	0.000610743	0.81302	-0.298637	3	3
Protein AroA(G)	G5B5_07600	Metabolism	Amino acid transport and metabolism	K04093	E	10 kDa	0.0012395	0.00080029	0.0013902	0.00096511	0.0011306	0.0010994	0	0.00114333	0.00106504	0.931522	-0.102339	3	3
Protein CyaY	G5B5_04910	Metabolism	Inorganic ion transport and metabolism	K06202	P	13 kDa	0.0015678	0.0015618	0.001055	0.0015382	0.0019501	0.0013906	0	0.00139487	0.0016263	1.16592	0.221466	3	3
Protein DrgA	G5B5_03075	Metabolism	Energy production and conversion	K15976	C	24 kDa	0.00069421	0.00045199	0.00039971	0.00038156	0.00036571	0.00053124	0	0.000515303	0.00042617	0.827027	-0.273993	3	3
Protein GrpE	G5B5_05975	Cellular processing and signaling	Post-translational modification, protein turnover, and chaperones	K03687	O	24 kDa	0.0021535	0.0029795	0.0026349	0.0023217	0.0024726	0.0029877	0	0.0025893	0.002594	1.00182	0.00261635	3	3
Fructose-1-phosphate phosphatase YqaB	G5B5_07235	Poorly characterized	Function unknown	-	S	22 kDa	0.00012975				0.00012911	0.0002046	0	0.00012975	0.000166855	1.28597	0.36286	1	2
Protein IscX	G5B5_07850	Poorly characterized	Function unknown	-	S	8 kDa	0.00096216	0.00039936	0.00044146	0.00033713	0.00059839	0.00071119	0	0.000600993	0.000548903	0.913327	-0.130797	3	3
hypothetical protein	G5B5_15405	Metabolism	Coenzyme transport and metabolism	K01737	H	16 kDa		0.0002128		0.00035928	0.00019131		0	0.0002128	0.000275295	1.29368	0.37148	1	2
Protein LemA	G5B5_03440	Poorly characterized	Function unknown	K03744	S	21 kDa	0.00090512	0.00075138	0.00055373	0.00038057	0.00058543	0.0004817	0	0.000736743	0.000482567	0.655	-0.610434	3	3
Thermostable beta-glucosidase B	G5B5_14840	Metabolism	Carbohydrate transport and metabolism	K05349	G	79 kDa	8.2939e-05	0.00019672	0.00017396	0.00022142	0.00022401	0.00021019	1	0.000151206	0.00021854	1.44531	0.531379	3	3
Protein tas	G5B5_07770	Metabolism	Energy production and conversion	K05882	C	35 kDa	0.001087	0.0011723	0.00133	0.0011198	0.00088751	0.00085704	0	0.00119643	0.000954783	0.798025	-0.325495	3	3
N-(5'-phosphoribosyl)anthranilate isomerase	G5B5_07625	Metabolism	Amino acid transport and metabolism	K01817,K06173	E	25 kDa	0.0002649	0.00029321	0.00037042	0.00038896	0.00037657	0.00058183	1	0.00030951	0.00044912	1.45107	0.537115	3	3
Protein TolB	G5B5_08755	Metabolism	Amino acid transport and metabolism	-	E	78 kDa	4.8708e-05	9.4348e-05	5.9597e-05	5.689e-05	8.482e-05	4.3204e-05	0	6.7551e-05	6.1638e-05	0.912466	-0.132157	3	3
Protein translocase subunit SecA	G5B5_16360	Cellular processing and signaling	Intracellular trafficking, secretion, and vesicular transport	K03070	U	113 kDa	0.00028601	0.00036454	0.00014846	0.00032393	0.0002846	0.00015375	0	0.000266337	0.000254093	0.954031	-0.0678925	3	3
Protein translocase subunit SecD	G5B5_08600	Cellular processing and signaling	Intracellular trafficking, secretion, and vesicular transport	K03072,K12257	U	56 kDa	6.6766e-05	0.00011085	0.00012254	9.3576e-05	8.3046e-05		0	0.000100052	8.8311e-05	0.882651	-0.180085	3	2
Protein YceI	G5B5_06790	Poorly characterized	Function unknown	-	S	21 kDa	0.00039509	0.0004373	0.00059083	0.00041017	0.00026209	0.00046725	0	0.000474407	0.000379837	0.800656	-0.320745	3	3
Ribonuclease VapC22	G5B5_06315	Poorly characterized	Function unknown	-	S	15 kDa	0.0003403	0.00045199	0.00024982	0.00057234	0.00047407	0.00048295	1	0.00034737	0.000509787	1.46756	0.55342	3	3
Protein YrdA	G5B5_07720	Cellular processing and signaling	Cell wall/membrane/envelope biogenesis	-	M	21 kDa	0.00017559	0.00029153	0.00021485	0.00016407	0.00026209	0.00036342	0	0.000227323	0.000263193	1.15779	0.211377	3	3
Protein/nucleic acid deglycase 1	G5B5_14500	Poorly characterized	Function unknown	-	S	31 kDa	9.2095e-05		0.00015024	8.605e-05	0.00012219		0	0.000121167	0.00010412	0.859306	-0.218756	2	2
Purine nucleoside phosphoramidase	G5B5_07535	unclassified	unclassified	K02503	F, G	12 kDa	0.00023517	0.0002603	0.00038365	0.00029298	0.00039002	0.00027813	0	0.00029304	0.000320377	1.09329	0.128671	3	3
Purine nucleoside phosphorylase 1	G5B5_03425	Metabolism	Nucleotide transport and metabolism	K03783	F	31 kDa	0.00030485	0.00040491	0.0005222	0.00034181	0.00039435	0.00050475	0	0.000410653	0.000413637	1.00726	0.0104431	3	3
putative ABC transporter ATP-binding protein YbiT	G5B5_07110	Poorly characterized	Function unknown	K06158,K10829	S	61 kDa	0.00014499	0.00019614	0.0001774	0.00016557	0.00011221	0.00011431	0	0.000172843	0.000130697	0.756157	-0.403243	3	3
putative ABC transporter ATP-binding protein YknY	G5B5_01690	Cellular processing and signaling	Defense mechanisms	K02003	V	29 kDa	0.00013455	0.00014893	0.00016463	0.00012572	0.00013389		0	0.00014937	0.000129805	0.869017	-0.202544	3	2
putative alcohol dehydrogenase AdhA	G5B5_10805	Metabolism	Energy production and conversion	K13953	C	35 kDa	0.0002122	0.00023487	0.00029209	0.00022306	0.00021115	0.00018822	0	0.000246387	0.000207477	0.842077	-0.247975	3	3
Biotin carboxylase	G5B5_01715	Metabolism	Lipid transport and metabolism	K01941,K01961	I	51 kDa	7.7015e-05	6.3933e-05		0.00010794	9.5794e-05	0.00011385	1	7.0474e-05	0.000105861	1.50213	0.587013	2	3
RecBCD enzyme subunit RecB	G5B5_03490	Information storage and processing	Replication, recombination and repair	K01144,K03582	L	132 kDa		2.4134e-05		2.7164e-05	3.6161e-05		0	2.4134e-05	3.16625e-05	1.31195	0.391708	1	2
Putative cysteine ligase BshC	G5B5_15135	Poorly characterized	Function unknown	-	S	62 kDa	3.0914e-05	3.4218e-05	7.565e-05	5.7771e-05	7.6905e-05	3.6561e-05	0	4.69273e-05	5.7079e-05	1.21633	0.282532	3	3
hypothetical protein	G5B5_05725	Poorly characterized	Function unknown	K02663	S	30 kDa		7.0933e-05		5.9879e-05	0.00012754		0	7.0933e-05	9.37095e-05	1.3211	0.401738	1	2
putative deferrochelatase/peroxidase YfeX	G5B5_05000	Metabolism	Inorganic ion transport and metabolism	K07223	P	33 kDa	0.00098194	0.00079916	0.00091875	0.00067463	0.00068972	0.0008539	0	0.00089995	0.000739417	0.82162	-0.283457	3	3
Putative D-galactosamine-6-phosphate deaminase AgaS	G5B5_06485	Cellular processing and signaling	Cell wall/membrane/envelope biogenesis	K02082	M	43 kDa	0.00013404	0.00012364	0.00013667	0.00012524	0.00013338	0.00015852	0	0.00013145	0.000139047	1.05779	0.081055	3	3
hypothetical protein	G5B5_04260	unclassified	unclassified	-	-	22 kDa	0.00018102	0.00025046	0.00022149	0.00033829	0.0002702	0.00037466	1	0.000217657	0.000327717	1.50566	0.590395	3	3
Aminomethyltransferase	G5B5_13190	Metabolism	Amino acid transport and metabolism	K00605	E	39 kDa	0.00038698	0.00037479	0.0004439	0.00076837	0.00052948	0.00057209	1	0.00040189	0.000623313	1.55096	0.633157	3	3
putative FAD-linked oxidoreductase	G5B5_01970	Metabolism	Energy production and conversion	K00102,K00104,K00803	C	52 kDa	0.00010751	9.9161e-05	6.5769e-05	0.00010045	0.00014264	0.00010595	0	9.08133e-05	0.000116347	1.28116	0.357454	3	3
putative Fe(2+)-trafficking protein	G5B5_12480	unclassified	unclassified	-	C, O	11 kDa	0.0047801	0.0022675	0.0033421	0.0029168	0.0029122	0.003115	0	0.00346323	0.00298133	0.860853	-0.216162	3	3
Alpha-galactosidase A	G5B5_11950	Metabolism	Carbohydrate transport and metabolism	K07407	G	43 kDa			5.3981e-05	4.1223e-05	4.3902e-05	0.00013044	0	5.3981e-05	7.1855e-05	1.33112	0.412637	1	3
Putative formate dehydrogenase	G5B5_10445	Metabolism	Energy production and conversion	K00123	C	113 kDa	0.0011455	0.0020155	0.00182	0.0021807	0.0014206	0.0012638	0	0.00166033	0.0016217	0.976732	-0.033966	3	3
Decaprenylphosphoryl-beta-D-ribose oxidase	G5B5_07210	Metabolism	Energy production and conversion	K00103	C	50 kDa			4.7744e-05		5.8243e-05	6.9222e-05	0	4.7744e-05	6.37325e-05	1.33488	0.41671	1	2
HTH-type transcriptional regulator PgrR	G5B5_14510	Information storage and processing	Transcription	-	K	33 kDa	5.7011e-05				8.5095e-05	6.7424e-05	0	5.7011e-05	7.62595e-05	1.33763	0.419677	1	2
Phosphoheptose isomerase	G5B5_15925	Metabolism	Carbohydrate transport and metabolism	K03271	G	21 kDa	8.8238e-05				0.00013171	0.00010436	0	8.8238e-05	0.000118035	1.33769	0.419743	1	2
Glucose 1-dehydrogenase 1	G5B5_02980	Metabolism	Secondary metabolites biosynthesis, transport, and catabolism	K00034,K00059,K00065	Q	27 kDa	0.0023572	0.0016259	0.0033439	0.0037027	0.0035694	0.0041614	1	0.00244233	0.00381117	1.56046	0.641973	3	3
Putative glutamine amidotransferase	G5B5_08945	Poorly characterized	Function unknown	K07010	S	30 kDa	6.3163e-05		0.00019321	0.00023607	0.00015713	0.0002241	0	0.000128187	0.000205767	1.60521	0.682765	2	3
putative glycine dehydrogenase (decarboxylating) subunit 1	G5B5_13160	Metabolism	Amino acid transport and metabolism	K00282	E	49 kDa	0.0025527	0.0020977	0.001538	0.0014275	0.0013663	0.0019898	0	0.0020628	0.00159453	0.772995	-0.37147	3	3
hypothetical protein	G5B5_15475	Cellular processing and signaling	Post-translational modification, protein turnover, and chaperones	K03605	O	18 kDa		0.0001117			0.00015063		0	0.0001117	0.00015063	1.34852	0.43138	1	1
Regulator of RpoS	G5B5_08550	Cellular processing and signaling	Signal transduction mechanisms	-	T	19 kDa	0.00030275	0.0004468	0.00024695	0.00047146	0.0005523	0.00053707	1	0.000332167	0.000520277	1.56631	0.647372	3	3
hypothetical protein	G5B5_04740	unclassified	unclassified	-	-	67 kDa	0.00032996	0.00041285	0.0002984	0.00057639	0.00054246	0.00052596	1	0.00034707	0.00054827	1.57971	0.65966	3	3
putative hydrolase	G5B5_05515	Metabolism	Amino acid transport and metabolism	K06016,K18151	E	57 kDa	8.19e-05	0.00012691	0.00012025	0.00012244	9.7796e-05	0.00017435	0	0.000109687	0.000131529	1.19913	0.261989	3	3
Putative hydrolase MhqD	G5B5_13175	Poorly characterized	Function unknown	K06999	S	23 kDa	0.00012194	0.00013497	0.0002984	0.0001899	0.00020223	0.00028843	0	0.000185103	0.000226853	1.22555	0.293429	3	3
Long-chain-fatty-acid--CoA ligase FadD15	G5B5_01745	Metabolism	Lipid transport and metabolism	K01897	I	65 kDa		0.00018242	0.00012832	0.00022399	0.00028326	0.00023035	1	0.00015537	0.000245867	1.58246	0.662168	2	3
Adenine deaminase	G5B5_10075	Poorly characterized	Function unknown	-	S	52 kDa	5.3974e-05	5.9741e-05	4.4026e-05	0.00011767	7.161e-05	6.3832e-05	1	5.25803e-05	8.43707e-05	1.60461	0.682218	3	3
Putative metal-dependent hydrolase YfiT	G5B5_10665	Poorly characterized	Function unknown	-	S	20 kDa	0.00059189	0.00065513	0.0007242	0.00059913	0.00068714	0.00064167	0	0.000657073	0.000642647	0.978044	-0.0320286	3	3
Putative metal-dependent hydrolase YfiT	G5B5_10230	unclassified	unclassified	-	-	19 kDa	0.00010773	0.00017886		0.00010066		0.00019111	0	0.000143295	0.000145885	1.01807	0.0258433	2	2
putative multidrug resistance protein EmrK	G5B5_02425	Cellular processing and signaling	Defense mechanisms	K03543	V	43 kDa	0.00047575	0.00055052	0.00052918	0.00052535	0.0004734	0.00043477	0	0.000518483	0.00047784	0.921611	-0.11777	3	3
hypothetical protein	G5B5_08025	Poorly characterized	Function unknown	-	S	113 kDa	1.6488e-05	1.8249e-05		2.3108e-05	3.2813e-05		1	1.73685e-05	2.79605e-05	1.60984	0.686917	2	2
Imidazole glycerol phosphate synthase subunit HisF	G5B5_11390	Metabolism	Amino acid transport and metabolism	K01663,K02500,K11755	E	26 kDa	6.8591e-05	0.00011388	0.00012589	0.00016022	0.00013651	0.0002028	1	0.000102787	0.00016651	1.61995	0.695951	3	3
putative N-succinyldiaminopimelate aminotransferase DapC	G5B5_14895	Metabolism	Amino acid transport and metabolism	K10907,K14267,K14287	E	43 kDa	0.00026405	0.00026791	0.00024231	0.00016448	0.00028465	0.00028626	0	0.00025809	0.00024513	0.949785	-0.0743272	3	3
putative oxidoreductase YdgJ	G5B5_02435	Poorly characterized	Function unknown	-	S	41 kDa	0.00053849	0.00059603	0.00068751	0.0005469	0.00044265	0.00055378	0	0.000607343	0.000514443	0.847039	-0.2395	3	3
Carbamoyl-phosphate synthase small chain	G5B5_00640	Metabolism	Nucleotide transport and metabolism	K01956	F	42 kDa	0.0001379	0.00010176	0.00014061	0.00019328	0.00020583	0.00021745	1	0.000126757	0.00020552	1.62137	0.697217	3	3
putative protein	G5B5_05575	Poorly characterized	Function unknown	-	S	14 kDa	0.00087127	0.00074182	0.00057402	0.00062622	0.00053352	0.0006341	0	0.000729037	0.000597947	0.820187	-0.285975	3	3
putative protein	G5B5_10225	Poorly characterized	Function unknown	-	S	15 kDa	0.00094068	0.00090237	0.00069058	0.0011133	0.00087365	0.00096417	0	0.000844543	0.000983707	1.16478	0.220057	3	3
Small heat shock protein IbpB	G5B5_09210	Cellular processing and signaling	Post-translational modification, protein turnover, and chaperones	K13993	O	19 kDa	0.005017	0.0049168	0.0047957	0.0075687	0.0069684	0.0097035	1	0.00490983	0.0080802	1.64572	0.718717	3	3
putative protein	G5B5_06875	Poorly characterized	Function unknown	-	S	27 kDa				0.00019302	0.00010278		0		0.0001479			0	2
Putative pterin-4-alpha-carbinolamine dehydratase	G5B5_01325	Metabolism	Coenzyme transport and metabolism	K01724	H	10 kDa					0.00045981	0.0003279	0		0.000393855			0	2
putative pyridine nucleotide-disulfide oxidoreductase RclA	G5B5_14695	Metabolism	Energy production and conversion	K00382,K00520	C	49 kDa	0.0003443	0.00033875	0.00035106	0.00025021	0.00036164	0.00033933	0	0.000344703	0.00031706	0.919805	-0.120599	3	3
Putative racemase YgeA	G5B5_06090	Cellular processing and signaling	Cell wall/membrane/envelope biogenesis	K01779	M	25 kDa	0.00031782	0.0003078	0.00077772	0.00040832	0.00094876	0.00037587	0	0.00046778	0.00057765	1.23488	0.304365	3	3
Peptide chain release factor RF2	G5B5_15270	Information storage and processing	Translation, ribosomal structure and biogenesis	K02836	J	42 kDa	4.733e-05			6.6335e-05			0	4.733e-05	6.6335e-05	1.40154	0.487015	1	1
Xaa-Pro dipeptidase	G5B5_03260	Metabolism	Amino acid transport and metabolism	K01262,K01271,K01274,K08688	E	43 kDa	4.468e-05			6.2622e-05			0	4.468e-05	6.2622e-05	1.40157	0.48704	1	1
hypothetical protein	G5B5_12050	Poorly characterized	Function unknown	K08996	S	18 kDa	0.00010578			0.00014826			0	0.00010578	0.00014826	1.40159	0.487063	1	1
Putative ring-cleaving dioxygenase MhqO	G5B5_13170	Metabolism	Amino acid transport and metabolism	K15975	E	36 kDa	0.00049079	0.00057341	0.00066722	0.0004331	0.0005155	0.00019348	0	0.00057714	0.000380693	0.65962	-0.600292	3	3
putative soluble pyridine nucleotide transhydrogenase	G5B5_12245	Metabolism	Energy production and conversion	K00322,K00382,K17883	C	51 kDa	0.00047304	0.00041887	0.00055564	0.00060112	0.00047071	0.0006042	0	0.000482517	0.000558677	1.15784	0.211435	3	3
Putative thiazole biosynthetic enzyme	G5B5_10440	Poorly characterized	Function unknown	K00274	S	48 kDa	0.00019685	0.00028325	0.00026494	0.0002759	0.00027424	0.00020953	0	0.000248347	0.000253223	1.01964	0.028055	3	3
putative transcriptional regulatory protein	G5B5_15045	Information storage and processing	Transcription	-	K	26 kDa	0.001606	0.0018962	0.0013537	0.0017007	0.0015981	0.0018994	0	0.00161863	0.00173273	1.07049	0.0982734	3	3
Putative TrmH family tRNA/rRNA methyltransferase	G5B5_10860	Information storage and processing	Translation, ribosomal structure and biogenesis	K03218,K03437	J	30 kDa	9.7552e-05	0.00014397	0.00019893	0.00012153	0.00012943	7.6914e-05	0	0.000146817	0.000109291	0.744403	-0.425843	3	3
putative xanthine dehydrogenase subunit A	G5B5_06130	Cellular processing and signaling	Post-translational modification, protein turnover, and chaperones	K07402	O	38 kDa	4.9885e-05	5.5215e-05	0.00012207	0.00011653	0.0001241	0.00014749	0	7.57233e-05	0.000129373	1.7085	0.77273	3	3
putative xanthine dehydrogenase subunit D	G5B5_06100	Metabolism	Nucleotide transport and metabolism	K00106,K03520,K13481,K13482	F	86 kDa	7.8091e-05	3.7044e-05	4.0949e-05	3.1271e-05	4.4404e-05		0	5.2028e-05	3.78375e-05	0.727253	-0.459471	3	2
Putative xanthine dehydrogenase YagR molybdenum-binding subunit	G5B5_16640	Metabolism	Nucleotide transport and metabolism	K11177	F	81 kDa	0.0001946	0.00021539	0.00026611	0.00025669	0.00019364	9.4764e-05	0	0.000225367	0.000181698	0.806233	-0.310732	3	3
hypothetical protein	G5B5_00510	unclassified	unclassified	-	-	18 kDa	0.00027266			0.00050953	0.00027132		0	0.00027266	0.000390425	1.43191	0.517942	1	2
hypothetical protein	G5B5_01975	Metabolism	Energy production and conversion	K00104,K11472	C	42 kDa	4.368e-05			8.1627e-05	4.3465e-05		0	4.368e-05	6.2546e-05	1.43191	0.517945	1	2
Putative xanthine dehydrogenase YagS FAD-binding subunit	G5B5_16645	Metabolism	Nucleotide transport and metabolism	K11178	F	35 kDa	0.00026445	0.00014635	0.00022649	0.00022238	0.00013157	9.3826e-05	0	0.00021243	0.000149259	0.702625	-0.509173	3	3
hypothetical protein	G5B5_07785	Poorly characterized	Function unknown	K05994	S	55 kDa	0.00013718	0.00015184	0.00016785	0.0002884	0.00022182	0.00024336	1	0.00015229	0.000251193	1.64944	0.721977	3	3
putative zinc protease	G5B5_04295	Cellular processing and signaling	Post-translational modification, protein turnover, and chaperones	-	O	48 kDa		6.6409e-05	4.894e-05	5.606e-05		4.7305e-05	0	5.76745e-05	5.16825e-05	0.896107	-0.158258	2	2
Putrescine--pyruvate aminotransferase	G5B5_02000	Metabolism	Amino acid transport and metabolism	K00823,K15372	E	50 kDa	0.00054387	0.00064499	0.00054662	0.00043558	0.00065717	0.00064322	0	0.000578493	0.000578657	1.00028	0.000407277	3	3
Pyridinium-3,5-biscarboxylic acid mononucleotide synthase	G5B5_11860	Poorly characterized	Function unknown	K06898	S	26 kDa	0.00013936	0.00023138	0.00017051	0.00019532	0.00017334	0.00016482	0	0.000180417	0.000177827	0.985644	-0.0208609	3	3
Pyridoxal 5'-phosphate synthase subunit PdxS	G5B5_00830	Metabolism	Coenzyme transport and metabolism	K06215	H	36 kDa	0.0038264	0.0025527	0.0047459	0.0035997	0.0032859	0.0029445	0	0.00370833	0.0032767	0.883604	-0.178527	3	3
Serine/threonine-protein kinase PknD	G5B5_02090	Cellular processing and signaling	Signal transduction mechanisms	K08884,K12132	T	92 kDa	2.1054e-05			2.9509e-05	3.1426e-05		0	2.1054e-05	3.04675e-05	1.44711	0.533177	1	2
Pyridoxal 5'-phosphate synthase subunit PdxT	G5B5_00820	Metabolism	Coenzyme transport and metabolism	K08681	H	21 kDa	0.00022864	0.00025307	0.00016785	0.00017091	0.00018201	0.00021632	0	0.00021652	0.000189747	0.876347	-0.190426	3	3
Pyridoxine 4-dehydrogenase	G5B5_03060	Metabolism	Energy production and conversion	-	C	32 kDa	0.00038954	0.00026533	0.00047662	0.00033598	0.00023854	0.00031894	0	0.000377163	0.00029782	0.789631	-0.340749	3	3
Pyrimidine-nucleoside phosphorylase	G5B5_03395	Metabolism	Nucleotide transport and metabolism	K00756,K00758	F	50 kDa	0.00028261	0.00029195	0.00029968	0.00024646	0.00035621	0.00026738	0	0.000291413	0.000290017	0.995207	-0.00693108	3	3
Pyrimidine-specific ribonucleoside hydrolase RihA	G5B5_07190	Metabolism	Nucleotide transport and metabolism	K01239,K01250	F	37 kDa	0.0001636	0.00021126	0.00020017	0.00017834	0.00013566	9.6739e-05	0	0.000191677	0.000136913	0.714291	-0.485415	3	3
Pyruvate dehydrogenase E1 component	G5B5_13610	Metabolism	Energy production and conversion	K00163	C	99 kDa	0.0020253	0.0027206	0.0028871	0.0031509	0.0029056	0.0022441	0	0.00254433	0.00276687	1.08746	0.120965	3	3
Pyruvate kinase	G5B5_04690	Metabolism	Carbohydrate transport and metabolism	K00873	G	55 kDa	0.0015666	0.0010099	0.001011	0.0009812	0.0010792	0.0011198	0	0.00119583	0.00106007	0.886467	-0.173861	3	3
hypothetical protein	G5B5_08555	Poorly characterized	Function unknown	-	S	33 kDa		9.4348e-05	6.9529e-05	0.00013274	0.00014137		1	8.19385e-05	0.000137055	1.67266	0.742142	2	2
hypothetical protein	G5B5_03725	Poorly characterized	Function unknown	K01607	S	15 kDa	0.00059411	0.0004384	0.00024231	0.00074016	0.00065688	0.0007807	1	0.00042494	0.000725913	1.70827	0.772538	3	3
putative metal-dependent hydrolase YcfH	G5B5_03150	Information storage and processing	Replication, recombination and repair	K03424	L	37 kDa	0.000203	0.00016852	0.00021733	0.00040306	0.00027775	0.00033011	1	0.000196283	0.000336973	1.71677	0.779697	3	3
hypothetical protein	G5B5_05255	Metabolism	Carbohydrate transport and metabolism	-	G	37 kDa			6.5303e-05	0.00012467	0.00010622	6.3121e-05	0	6.5303e-05	9.80037e-05	1.50075	0.585686	1	3
Recombination protein RecR	G5B5_02135	Information storage and processing	Replication, recombination and repair	K06187	L	23 kDa	0.00033606	0.00023248	0.00030839	0.00031401	0.00020901	0.00029809	0	0.00029231	0.000273703	0.936346	-0.0948862	3	3
HTH-type transcriptional regulator Hpr	G5B5_03020	Information storage and processing	Transcription	-	K	17 kDa	0.0011047	0.0014158	0.0012094	0.0020645	0.0017357	0.002613	1	0.0012433	0.00213773	1.7194	0.781907	3	3
hypothetical protein	G5B5_08110	Metabolism	Amino acid transport and metabolism	K01273	E	49 kDa		4.3095e-05		9.0948e-05	3.8743e-05		0	4.3095e-05	6.48455e-05	1.50471	0.589486	1	2
Response regulator rcp1	G5B5_07090	Cellular processing and signaling	Signal transduction mechanisms	K02485	T	16 kDa	0.00094068	0.00118	0.00084404	0.0012891	0.00081124	0.0015575	0	0.00098824	0.00121928	1.23379	0.303096	3	3
hypothetical protein	G5B5_12555	Cellular processing and signaling	Cell wall/membrane/envelope biogenesis	-	M	109 kDa		1.9752e-05		3.3347e-05	2.6636e-05		0	1.9752e-05	2.99915e-05	1.5184	0.602555	1	2
DNA mismatch repair protein MutS	G5B5_15670	Information storage and processing	Replication, recombination and repair	K03555	L	99 kDa		2.1405e-05		3.6139e-05	2.8865e-05		0	2.1405e-05	3.2502e-05	1.51843	0.602581	1	2
UDP-N-acetylmuramate--L-alanyl-gamma-D-glutamyl-meso-2,6-diaminoheptandioate ligase	G5B5_02365	Cellular processing and signaling	Cell wall/membrane/envelope biogenesis	K02558	M	51 kDa	0.00033553	0.00033012	0.0003193	0.00045285	0.00064921	0.00059523	1	0.000328317	0.000565763	1.72322	0.785111	3	3
Riboflavin biosynthesis protein RibF	G5B5_02510	Metabolism	Coenzyme transport and metabolism	K11753	H	35 kDa		0.00012109	0.0001004	0.00010222	5.4433e-05		0	0.000110745	7.83265e-05	0.707269	-0.499669	2	2
Riboflavin synthase	G5B5_05950	Metabolism	Coenzyme transport and metabolism	K00793	H	23 kDa	0.00024276	0.00040304	0.00044553	0.00034024	0.00032208	0.00043065	0	0.000363777	0.000364323	1.0015	0.00216639	3	3
Ribonuclease E	G5B5_12920	Information storage and processing	Translation, ribosomal structure and biogenesis	K08300,K08301	J	119 kDa	0.00012296	0.00019962	0.00012036	0.00011489	0.0001142	0.00012604	0	0.000147647	0.000118377	0.801756	-0.318764	3	3
Acetylornithine aminotransferase	G5B5_02610	Metabolism	Amino acid transport and metabolism	K00818,K00821,K00836,K05830,K13745	E	45 kDa	0.00012633	0.00011652	0.00015457	0.00023607	0.00020951	0.000249	1	0.000132473	0.000231527	1.74772	0.805476	3	3
Ribonuclease PH	G5B5_05580	Information storage and processing	Translation, ribosomal structure and biogenesis	K00989,K02428	J	26 kDa	0.00072261	0.0004399	0.00039786	0.00043887	0.00043143	0.00038457	0	0.000520123	0.00041829	0.804213	-0.31435	3	3
Ribonuclease R	G5B5_04630	Information storage and processing	Transcription	K01147	K	60 kDa	3.1926e-05	0.00012368	0.00011719	7.4577e-05	7.9422e-05	5.6637e-05	0	9.0932e-05	7.0212e-05	0.772137	-0.37307	3	3
Ribonuclease R	G5B5_12365	Information storage and processing	Transcription	K01147,K12573,K12585	K	106 kDa	7.3857e-05	0.00024524	0.00015814	0.00015527	0.00018373	5.4592e-05	0	0.000159079	0.000131197	0.824731	-0.278005	3	3
UvrABC system protein B	G5B5_02655	Information storage and processing	Replication, recombination and repair	K03702	L	76 kDa	3.9667e-05	5.8541e-05		7.4128e-05	0.00010526	7.8188e-05	1	4.9104e-05	8.58587e-05	1.74851	0.806123	2	3
Nucleoside diphosphate kinase	G5B5_13250	Metabolism	Nucleotide transport and metabolism	K00940	F	15 kDa	0.0019722	0.0026759	0.0017125	0.0042801	0.0043049	0.0027087	1	0.0021202	0.00376457	1.77557	0.828283	3	3
Octaprenyl diphosphate synthase	G5B5_03160	Metabolism	Coenzyme transport and metabolism	K02523,K13787	H	37 kDa		5.7502e-05	6.3564e-05	9.7083e-05	0.00010339	0.00012288	1	6.0533e-05	0.000107784	1.78059	0.832354	2	3
Ribose operon repressor	G5B5_05205	Information storage and processing	Transcription	K02529	K	37 kDa		8.7025e-05	6.4133e-05	0.00012244	0.00013039	6.199e-05	0	7.5579e-05	0.00010494	1.38848	0.473507	2	3
Ribose-5-phosphate isomerase A	G5B5_10520	Metabolism	Carbohydrate transport and metabolism	K00851,K01807	G	24 kDa	0.00096693	0.0011987	0.0012777	0.001048	0.00092368	0.001235	0	0.00114778	0.00106889	0.931273	-0.102724	3	3
Ribose-phosphate pyrophosphokinase	G5B5_08170	Metabolism	Nucleotide transport and metabolism	K00948	F	40 kDa	0.00021241	0.00018286	0.00014439	0.00022052	0.00014091	0.00016747	0	0.000179887	0.0001763	0.980062	-0.0290558	3	3
Ribosomal large subunit pseudouridine synthase B	G5B5_09785	Information storage and processing	Translation, ribosomal structure and biogenesis	K06178,K06181,K06182,K06183	J	35 kDa	0.0006535	0.00031449	0.00041718	0.00023894	0.00045237	0.00040324	0	0.000461723	0.00036485	0.790192	-0.339725	3	3
Ribosomal protein S12 methylthiotransferase RimO	G5B5_16750	Metabolism	Energy production and conversion	-	C	56 kDa	0.00030336	0.00033578	0.00026201	0.00030013	0.00019533	0.00031657	0	0.000300383	0.000270677	0.901104	-0.150234	3	3
Ribosomal protein S6--L-glutamate ligase	G5B5_12145	Poorly characterized	Function unknown	-	S	36 kDa	8.0058e-05	0.00017722	0.00016326	9.9738e-05	0.00013277	9.4681e-05	0	0.000140179	0.000109063	0.778025	-0.362112	3	3
Ribosomal silencing factor RsfS	G5B5_08900	Poorly characterized	Function unknown	K09710	S	20 kDa	0.0003322	0.00042023	0.00046453	0.0003104	0.00047224	0.00033676	0	0.000405653	0.000373133	0.919833	-0.120556	3	3
Ribosomal-protein-alanine acetyltransferase	G5B5_16040	Poorly characterized	Function unknown	K03789	S	17 kDa	0.00017215	0.00019055	0.00014042	0.00016085	0.0001142	0.0002036	0	0.000167707	0.00015955	0.951363	-0.0719314	3	3
Ribosome maturation factor RimP	G5B5_05670	Poorly characterized	Function unknown	K09748	S	21 kDa	0.00031843	0.00040281	0.00033396	0.00038255	0.0004074	0.0003766	0	0.000351733	0.00038885	1.10553	0.144732	3	3
hypothetical protein	G5B5_11930	unclassified	unclassified	-	-	28 kDa	9.4068e-05	0.00013883	0.00023019	0.00032228	0.00024961	0.00025958	1	0.000154363	0.000277157	1.79549	0.844378	3	3
Ribosome-recycling factor	G5B5_07575	Information storage and processing	Translation, ribosomal structure and biogenesis	K02838	J	22 kDa				0.00016914	0.0001351		0		0.00015212			0	2
Ribulose-phosphate 3-epimerase	G5B5_10615	Metabolism	Carbohydrate transport and metabolism	K01783	G	24 kDa	0.0007839	0.0012581	0.00091118	0.0012452	0.00054603	0.00083438	0	0.000984393	0.000875203	0.889079	-0.169617	3	3
RNA polymerase sigma factor FliA	G5B5_15070	Information storage and processing	Transcription	K03088	K	29 kDa	0.00041316	0.00064785	0.00058977	0.00045039	0.00041113	0.00044791	0	0.00055026	0.000436477	0.793219	-0.334209	3	3
hypothetical protein	G5B5_06310	unclassified	unclassified	-	-	11 kDa		0.00019243		0.00032489			0	0.00019243	0.00032489	1.68835	0.755618	1	1
RNA polymerase sigma factor RpoD	G5B5_09595	Information storage and processing	Transcription	K02316,K03086,K03087	K	65 kDa	0.00020165	0.00029188	0.00030367	0.00028988	0.00024697	0.00011007	0	0.000265733	0.00021564	0.81149	-0.301354	3	3
RNA-binding protein Hfq	G5B5_04375	Information storage and processing	Transcription	K03666	K	11 kDa	0.0023293	0.0021816	0.0012058	0.0018416	0.002407	0.0021191	0	0.00190557	0.00212257	1.11388	0.15559	3	3
putative protein YqeY	G5B5_07310	Poorly characterized	Function unknown	K09117	S	17 kDa	0.00033341			0.00057113			0	0.00033341	0.00057113	1.713	0.776522	1	1
Rod shape-determining protein MreB	G5B5_03760	Cellular processing and signaling	Cell cycle control, cell division, chromosome partitioning	K03569	D	38 kDa	0.00044643	0.00049413	0.00039449	0.00037078	0.00046891	0.00035198	0	0.000445017	0.000397223	0.892603	-0.163909	3	3
GTP 3',8-cyclase	G5B5_10000	Metabolism	Coenzyme transport and metabolism	K03639	H	39 kDa	5.017e-05		6.1385e-05	0.00014063	7.4884e-05	8.9e-05	1	5.57775e-05	0.000101505	1.81981	0.863791	2	3
Segregation and condensation protein B	G5B5_09805	Information storage and processing	Transcription	K06024	K	42 kDa	0.00013612	0.000226	0.00022206	0.00019078	0.00013545	0.00013415	0	0.000194727	0.00015346	0.788079	-0.343588	3	3
Glutamate synthase [NADPH] large chain	G5B5_02590	Metabolism	Amino acid transport and metabolism	K00265,K00284	E	166 kDa	3.392e-05	5.006e-05	4.842e-05	0.00010565	6.1881e-05	7.3546e-05	1	4.41333e-05	8.0359e-05	1.82082	0.864591	3	3
Serine-pyruvate aminotransferase	G5B5_07300	Metabolism	Amino acid transport and metabolism	-	E	42 kDa	0.0091828	0.010114	0.0065769	0.0053574	0.005594	0.0068869	0	0.00862457	0.0059461	0.689438	-0.536508	3	3
Sensor histidine kinase TmoS	G5B5_07085	Cellular processing and signaling	Signal transduction mechanisms	-	T	57 kDa		3.7666e-05		3.1796e-05	8.4656e-05	8.0491e-05	0	3.7666e-05	6.56477e-05	1.74289	0.801481	1	3
Tricorn protease	G5B5_06055	Cellular processing and signaling	Cell wall/membrane/envelope biogenesis	K08676	M	121 kDa		1.7462e-05		2.9482e-05	3.1398e-05		0	1.7462e-05	3.044e-05	1.74321	0.80175	1	2
Serine--tRNA ligase	G5B5_00220	Information storage and processing	Translation, ribosomal structure and biogenesis	K01875,K07284	J	50 kDa	0.00096058	0.00080805	0.00098726	0.00077188	0.00086026	0.00088611	0	0.00091863	0.000839417	0.91377	-0.130097	3	3
Shikimate dehydrogenase (NADP(+))	G5B5_11820	Metabolism	Amino acid transport and metabolism	K13832	E	73 kDa	0.00025634	0.00075189	0.00045478	0.00038323	0.00045914	0.00045475	0	0.00048767	0.000432373	0.88661	-0.173628	3	3
Signal recognition particle protein	G5B5_16335	Cellular processing and signaling	Intracellular trafficking, secretion, and vesicular transport	K03106	U	50 kDa	0.00015236	0.0002108	0.00011651	8.8975e-05	0.00015161	0.00015767	0	0.00015989	0.000132752	0.830269	-0.26835	3	3
Chemotaxis protein CheY	G5B5_12140	Cellular processing and signaling	Signal transduction mechanisms	K07663,K07776	T	16 kDa	0.00011785					0.00020906	0	0.00011785	0.00020906	1.77395	0.826965	1	1
Inositol 2-dehydrogenase/D-chiro-inositol 3-dehydrogenase	G5B5_09065	Poorly characterized	Function unknown	K00118	S	40 kDa		7.9654e-05		0.00013448	0.00011935	0.00017022	0	7.9654e-05	0.00014135	1.77455	0.827453	1	3
Single-stranded DNA-binding protein	G5B5_04900	Information storage and processing	Replication, recombination and repair	K03111	L	17 kDa	0.0019754	0.0019436	0.002887	0.0012305	0.0022933	0.0018171	0	0.00226867	0.0017803	0.784734	-0.349724	3	3
hypothetical protein	G5B5_03345	Poorly characterized	Function unknown	-	S	23 kDa	0.00024732	0.00027374	0.0003026	0.0005392	0.00041016	0.00058498	1	0.000274553	0.000511447	1.86283	0.897497	3	3
hypothetical protein	G5B5_02075	Cellular processing and signaling	Defense mechanisms	K01155	V	26 kDa		0.00012459		0.00017529	0.00022401	0.00026624	0	0.00012459	0.000221847	1.78061	0.832375	1	3
hypothetical protein	G5B5_03225	Poorly characterized	Function unknown	-	S	24 kDa	0.0019679	0.0025132	0.0016669	0.0033592	0.0031632	0.0051022	1	0.00204933	0.00387487	1.89079	0.918992	3	3
hypothetical protein	G5B5_04835	Poorly characterized	Function unknown	-	S	11 kDa	0.00046209			0.00077717	0.00082766	0.00087439	0	0.00046209	0.000826407	1.78841	0.838678	1	3
Alpha-1,4-glucan:maltose-1-phosphate maltosyltransferase	G5B5_02760	Poorly characterized	Function unknown	-	S	142 kDa	0.0001326	0.00023947	0.00010247	0.00029345	0.0003264	0.00028063	1	0.00015818	0.00030016	1.89759	0.924165	3	3
DNA-directed RNA polymerase subunit alpha	G5B5_11545	Information storage and processing	Transcription	K03040	K	40 kDa	0.0019537	0.0033372	0.0038956	0.005454	0.0051603	0.0069032	1	0.00306217	0.00583917	1.90687	0.93121	3	3
Sorbitol dehydrogenase	G5B5_12590	Poorly characterized	Function unknown	K18335	S	26 kDa	0.00024485	0.00011615	0.00025679	0.0001961	0.00017403	0.00016547	0	0.00020593	0.000178533	0.866961	-0.205961	3	3
Sporulation initiation inhibitor protein Soj	G5B5_08955	Cellular processing and signaling	Cell cycle control, cell division, chromosome partitioning	K03496	D	32 kDa		6.4356e-05	7.1141e-05	0.00010866	0.00011571	6.8764e-05	0	6.77485e-05	9.77113e-05	1.44227	0.528337	2	3
Squalene--hopene cyclase	G5B5_00750	Metabolism	Lipid transport and metabolism	K06045,K18115	I	77 kDa	6.4843e-05	5.7417e-05	4.7603e-05	3.6352e-05	5.1619e-05		0	5.6621e-05	4.39855e-05	0.776841	-0.364309	3	2
SsrA-binding protein	G5B5_13390	Cellular processing and signaling	Post-translational modification, protein turnover, and chaperones	K03664	O	20 kDa	0.00014633	0.00021595	0.00011936	0.0001823	0.00019414	0.00011537	0	0.000160547	0.000163937	1.02112	0.0301459	3	3
Succinate--CoA ligase [ADP-forming] subunit alpha	G5B5_13240	Metabolism	Energy production and conversion	K01902,K08692	C	30 kDa	0.000625	0.00088943	0.0011289	0.00088987	0.00085884	0.00059836	0	0.00088111	0.000782357	0.887922	-0.171496	3	3
hypothetical protein	G5B5_12355	Poorly characterized	Function unknown	-	S	21 kDa		0.00010123		0.00021363	0.00018201	0.00016224	0	0.00010123	0.00018596	1.837	0.877355	1	3
Succinate--CoA ligase [ADP-forming] subunit beta	G5B5_13235	Metabolism	Energy production and conversion	K01903	C	42 kDa	0.002934	0.003198	0.0030144	0.0017579	0.0030087	0.0024634	0	0.0030488	0.00241	0.790475	-0.339208	3	3
hypothetical protein	G5B5_09945	Poorly characterized	Function unknown	-	S	16 kDa	0.00011477			0.00021447			0	0.00011477	0.00021447	1.86869	0.90203	1	1
Succinate-semialdehyde dehydrogenase [NADP(+)] 1	G5B5_15550	Metabolism	Energy production and conversion	K00135,K08324	C	50 kDa	0.0012928	0.0012601	0.001086	0.0013883	0.0010177	0.0015062	0	0.00121297	0.00130407	1.07511	0.104478	3	3
hypothetical protein	G5B5_15655	Metabolism	Amino acid transport and metabolism	K01322	E	79 kDa		4.0717e-05	4.501e-05	9.1659e-05	7.3211e-05		1	4.28635e-05	8.2435e-05	1.9232	0.943507	2	2
Succinyl-diaminopimelate desuccinylase	G5B5_16390	Metabolism	Amino acid transport and metabolism	K01436,K01438,K01439	E	50 kDa	0.00076345	0.0008239	0.00072394	0.00073118	0.0007407	0.00079004	0	0.00077043	0.000753973	0.97864	-0.0311504	3	3
Sulfate adenylyltransferase subunit 1	G5B5_12805	Metabolism	Inorganic ion transport and metabolism	K00955,K00956	P	59 kDa	0.00014525	0.00030368	0.00023696	0.00028652	0.00028907	0.00036265	0	0.00022863	0.000312747	1.36792	0.45198	3	3
Sulfate adenylyltransferase subunit 2	G5B5_12800	Metabolism	Inorganic ion transport and metabolism	K00390,K00957	P	36 kDa	0.00022227	0.00027677	0.00033995	0.0002596	0.00030412	0.00036145	0	0.000279663	0.00030839	1.10272	0.141065	3	3
Uptake hydrogenase small subunit	G5B5_15455	Metabolism	Energy production and conversion	K06282	C	41 kDa	4.6577e-05				9.2694e-05		0	4.6577e-05	9.2694e-05	1.99012	0.992858	1	1
Segregation and condensation protein A	G5B5_10380	Poorly characterized	Function unknown	K05896	S	40 kDa		5.3838e-05		0.00013635	7.2602e-05	0.00011505	0	5.3838e-05	0.000108001	2.00603	1.00434	1	3
Sulfite reductase [ferredoxin]	G5B5_16585	Metabolism	Energy production and conversion	K00366,K00381,K00392	C	63 kDa	0.00074688	0.00077608	0.0011003	0.00082604	0.00078871	0.0011177	0	0.00087442	0.000910817	1.04162	0.0588343	3	3
Sulfite reductase [NADPH] flavoprotein alpha-component	G5B5_06385	Metabolism	Inorganic ion transport and metabolism	K00380	P	44 kDa	0.0014745	0.0018051	0.0015854	0.0014194	0.0013116	0.0017174	0	0.00162167	0.0014828	0.914368	-0.129153	3	3
putative ABC transporter ATP-binding protein YlmA	G5B5_02640	Metabolism	Inorganic ion transport and metabolism	K02013,K05776	P	29 kDa	6.6013e-05	7.3066e-05	8.0769e-05	0.0001542			0	7.32827e-05	0.0001542	2.10418	1.07326	3	1
Sulfofructose kinase	G5B5_07910	Metabolism	Carbohydrate transport and metabolism	K00852,K18478	G	34 kDa					8.2161e-05	9.7649e-05	0		8.9905e-05			0	2
Sulfurtransferase	G5B5_16355	Metabolism	Inorganic ion transport and metabolism	-	P	12 kDa	0.00041027	0.00036328	0.00050198	0.00046001	0.00048989	0.00038816	0	0.000425177	0.00044602	1.04902	0.069046	3	3
Ribonucleoside-diphosphate reductase 1 subunit alpha	G5B5_15800	Metabolism	Nucleotide transport and metabolism	K00525	F	91 kDa	0.0001397	0.00020221	0.00018408	0.00036147	0.00037427	0.0002796	1	0.00017533	0.000338447	1.93034	0.948856	3	3
Histidine biosynthesis bifunctional protein HisB	G5B5_11410	Metabolism	Amino acid transport and metabolism	K01089,K01693	E	23 kDa	8.3616e-05			0.00011719		0.00024722	0	8.3616e-05	0.000182205	2.17907	1.12371	1	2
Tagatose 1,6-diphosphate aldolase 2	G5B5_05600	Metabolism	Carbohydrate transport and metabolism	K01635,K01671	G	36 kDa	0.0020879	0.0019554	0.0022271	0.0017758	0.0021308	0.0017095	0	0.00209013	0.00187203	0.895653	-0.158989	3	3
ATP-dependent RecD-like DNA helicase	G5B5_00055	Information storage and processing	Replication, recombination and repair	K01144,K03581	L	102 kDa	3.8381e-05	3.1862e-05	3.5221e-05	8.069e-05	6.6836e-05	6.8088e-05	1	3.51547e-05	7.18713e-05	2.04443	1.0317	3	3
Glucose-6-phosphate 1-dehydrogenase 1	G5B5_15595	Metabolism	Carbohydrate transport and metabolism	K00036	G	52 kDa	5.6643e-05	4.1797e-05		0.00010585	0.00011273	8.9319e-05	1	4.922e-05	0.000102633	2.08519	1.06018	2	3
DNA-binding protein HU	G5B5_08980	Information storage and processing	Replication, recombination and repair	K03530	L	11 kDa	0.0083317	0.0069413	0.0044942	0.012222	0.01774	0.012185	1	0.00658907	0.014049	2.13217	1.09232	3	3
L-fuconate dehydratase	G5B5_12585	Cellular processing and signaling	Cell wall/membrane/envelope biogenesis	K18334	M	48 kDa	4.0836e-05			0.00013354	8.1269e-05	7.2442e-05	0	4.0836e-05	9.57503e-05	2.34475	1.22944	1	3
Thiol:disulfide interchange protein DsbD	G5B5_04700	Cellular processing and signaling	Post-translational modification, protein turnover, and chaperones	K01829	O	19 kDa	0.00015313	0.0001695		0.00019078		0.00012074	0	0.000161315	0.00015576	0.965564	-0.0505558	2	2
Thiol-disulfide oxidoreductase ResA	G5B5_08290	Cellular processing and signaling	Post-translational modification, protein turnover, and chaperones	K03564	O	20 kDa	0.00014315	0.00026407		0.0002675	0.00018992	0.00033859	0	0.00020361	0.000265337	1.30316	0.382016	2	3
Thiol-disulfide oxidoreductase ResA	G5B5_10335	Poorly characterized	Function unknown	-	O	142 kDa	5.4959e-05	0.00010646	6.7244e-05	9.6285e-05	9.5704e-05	4.8748e-05	0	7.6221e-05	8.02457e-05	1.0528	0.074235	3	3
Protein RecA	G5B5_14775	Information storage and processing	Replication, recombination and repair	K03553	L	38 kDa	0.00014592	0.00010768	0.00011903	0.00018179	0.00024201	0.00037392	1	0.00012421	0.000265907	2.14078	1.09814	3	3
Phosphate-specific transport system accessory protein PhoU	G5B5_12545	Metabolism	Inorganic ion transport and metabolism	K02039	P	25 kDa	0.00019598	0.00017353	0.00038365	0.00043947	0.00054603	0.00064896	1	0.000251053	0.00054482	2.17014	1.11779	3	3
hypothetical protein	G5B5_01965	Metabolism	Carbohydrate transport and metabolism	-	G	119 kDa	1.6334e-05	5.4239e-05		8.3943e-05	7.3142e-05		1	3.52865e-05	7.85425e-05	2.22585	1.15436	2	2
Thioredoxin/glutathione peroxidase BtuE	G5B5_02080	Cellular processing and signaling	Post-translational modification, protein turnover, and chaperones	K00432	O	20 kDa	0.0010441	0.00078793	0.0012194	0.0006208	0.00061391	0.0011225	0	0.00101714	0.000785737	0.772494	-0.372405	3	3
contamination	Albu_Bovine	Cellular processing and signaling	Extracellular structures	-	-	69 kDa			8.8487e-05	8.1089e-05	0.00056132	0.00059871	0	8.8487e-05	0.000413706	4.67533	2.22507	1	3
hypothetical protein	G5B5_03175	unclassified	unclassified	-	-	59 kDa	4.6867e-05						0	4.6867e-05				1	0
LPS-assembly lipoprotein LptE	G5B5_03280	unclassified	unclassified	-	-	19 kDa				9.4293e-05			0		9.4293e-05			0	1
Threonine synthase	G5B5_13775	Metabolism	Amino acid transport and metabolism	K01733	E	40 kDa	0.0001878	0.00020787	0.00014361	0.00015354	0.00018688	0.00019434	0	0.00017976	0.000178253	0.991618	-0.012143	3	3
Threonine--tRNA ligase 1	G5B5_09050	Information storage and processing	Translation, ribosomal structure and biogenesis	K01868	J	77 kDa	0.0011441	0.0013659	0.0016043	0.0013092	0.0014198	0.0011858	0	0.00137143	0.00130493	0.951511	-0.0717084	3	3
Threonylcarbamoyl-AMP synthase	G5B5_15285	Information storage and processing	Translation, ribosomal structure and biogenesis	K07566	J	23 kDa	0.00020513	0.00031787	0.00065257	0.00046001	0.00036742	0.0004852	0	0.000391857	0.000437543	1.11659	0.1591	3	3
Decaprenylphosphoryl-2-keto-beta-D-erythro-pentose reductase	G5B5_07205	unclassified	unclassified	K16652	I, Q	30 kDa				5.8806e-05			0		5.8806e-05			0	1
hypothetical protein	G5B5_08665	unclassified	unclassified	-	-	33 kDa						0.00010453	0		0.00010453			0	1
hypothetical protein	G5B5_08825	unclassified	unclassified	-	-	28 kDa	6.6513e-05						0	6.6513e-05				1	0
hypothetical protein	G5B5_08845	unclassified	unclassified	-	-	26 kDa	0.00011021						0	0.00011021				1	0
hypothetical protein	G5B5_08905	unclassified	unclassified	-	-	137 kDa		2.2705e-05					0	2.2705e-05				1	0
hypothetical protein	G5B5_09180	unclassified	unclassified	-	K, T	28 kDa				6.7518e-05			0		6.7518e-05			0	1
hypothetical protein	G5B5_09200	unclassified	unclassified	-	-	47 kDa				3.8696e-05			0		3.8696e-05			0	1
hypothetical protein	G5B5_09855	unclassified	unclassified	-	-	13 kDa						0.00035805	0		0.00035805			0	1
hypothetical protein	G5B5_10405	unclassified	unclassified	-	-	11 kDa	0.0003736						0	0.0003736				1	0
hypothetical protein	G5B5_11070	unclassified	unclassified	-	-	21 kDa		0.00010123					0	0.00010123				1	0
Phosphoenolpyruvate carboxykinase [GTP]	G5B5_06165	Metabolism	Energy production and conversion	K01596	C	69 kDa	2.8692e-05	6.3515e-05	3.5106e-05	8.0426e-05	0.00014275	6.7865e-05	1	4.24377e-05	9.70137e-05	2.28603	1.19284	3	3
Trans-2,3-dihydro-3-hydroxyanthranilate isomerase	G5B5_12880	Poorly characterized	Function unknown	K06998	S	33 kDa	0.00031873	0.00025658	0.00031908	0.00027074	0.0002595	0.00030842	0	0.00029813	0.000279553	0.937689	-0.092818	3	3
hypothetical protein	G5B5_13145	unclassified	unclassified	-	-	15 kDa				0.00012719			0		0.00012719			0	1
hypothetical protein	G5B5_13425	unclassified	unclassified	-	-	36 kDa					5.2003e-05		0		5.2003e-05			0	1
RNA-binding protein Hfq	G5B5_13660	unclassified	unclassified	K03666	-	10 kDa				0.0002675			0		0.0002675			0	1
Exopolyphosphatase	G5B5_13975	unclassified	unclassified	K01524	F, P	58 kDa				3.1251e-05			0		3.1251e-05			0	1
DNA polymerase/3'-5' exonuclease PolX	G5B5_15120	unclassified	unclassified	K02347,K04477	E, L	67 kDa						3.3933e-05	0		3.3933e-05			0	1
hypothetical protein	G5B5_15255	unclassified	unclassified	-	-	24 kDa	8.0548e-05						0	8.0548e-05				1	0
hypothetical protein	G5B5_15675	unclassified	unclassified	-	-	9 kDa	0.00032924						0	0.00032924				1	0
hypothetical protein	G5B5_00250	Cellular processing and signaling	Cell wall/membrane/envelope biogenesis	K01114	M	93 kDa		2.3165e-05					0	2.3165e-05				1	0
hypothetical protein	G5B5_00580	Cellular processing and signaling	Cell wall/membrane/envelope biogenesis	-	M	83 kDa				2.1335e-05			0		2.1335e-05			0	1
Transaldolase	G5B5_09905	Metabolism	Carbohydrate transport and metabolism	K00616	G	36 kDa	0.0073075	0.0089771	0.010808	0.0082535	0.010335	0.0082307	0	0.00903087	0.00893973	0.989909	-0.0146326	3	3
Blue-light-activated protein	G5B5_02095	Cellular processing and signaling	Signal transduction mechanisms	-	T	14 kDa	0.00020577						0	0.00020577				1	0
Thiol-disulfide oxidoreductase ResA	G5B5_03355	Cellular processing and signaling	Post-translational modification, protein turnover, and chaperones	K02199	O	21 kDa				8.4572e-05			0		8.4572e-05			0	1
D-aminopeptidase	G5B5_04330	Cellular processing and signaling	Defense mechanisms	K03307	V	155 kDa		1.345e-05					0	1.345e-05				1	0
Transcription antitermination protein NusB	G5B5_11105	Information storage and processing	Transcription	K03625	K	17 kDa	0.00078175	0.0013312	0.0015451	0.0013485	0.00059839	0.00085343	0	0.00121935	0.00093344	0.765523	-0.385483	3	3
UDP-N-acetylmuramate--L-alanine ligase	G5B5_05095	Cellular processing and signaling	Cell wall/membrane/envelope biogenesis	K01921,K01924	M	51 kDa		6.0863e-05					0	6.0863e-05				1	0
UDP-N-acetylmuramoyl-L-alanyl-D-glutamate--2,6-diaminopimelate ligase	G5B5_05135	Cellular processing and signaling	Cell wall/membrane/envelope biogenesis	K01928,K05362,K15792	M	54 kDa	3.5119e-05						0	3.5119e-05				1	0
Signal recognition particle receptor FtsY	G5B5_05940	Cellular processing and signaling	Intracellular trafficking, secretion, and vesicular transport	K03110	U	35 kDa						6.3702e-05	0		6.3702e-05			0	1
Multidrug resistance protein MdtA	G5B5_06525	Cellular processing and signaling	Defense mechanisms	K03585,K07799	V	45 kDa				5.7101e-05			0		5.7101e-05			0	1
UDP-glucose 6-dehydrogenase TuaD	G5B5_06795	Cellular processing and signaling	Cell wall/membrane/envelope biogenesis	K00012	M	52 kDa				3.4468e-05			0		3.4468e-05			0	1
Cobalt-zinc-cadmium resistance protein CzcB	G5B5_07170	Cellular processing and signaling	Defense mechanisms	-	V	48 kDa				7.2277e-05			0		7.2277e-05			0	1
hypothetical protein	G5B5_08010	Cellular processing and signaling	Post-translational modification, protein turnover, and chaperones	-	O	33 kDa	5.9322e-05						0	5.9322e-05				1	0
Acyl-[acyl-carrier-protein]--UDP-N-acetylglucosamine O-acyltransferase	G5B5_08270	Cellular processing and signaling	Cell wall/membrane/envelope biogenesis	K00677	M	28 kDa			8.0467e-05				0	8.0467e-05				1	0
Protein translocase subunit SecF	G5B5_08595	Cellular processing and signaling	Intracellular trafficking, secretion, and vesicular transport	K03074	U	35 kDa			6.735e-05				0	6.735e-05				1	0
Peptide methionine sulfoxide reductase MsrA	G5B5_09820	Cellular processing and signaling	Post-translational modification, protein turnover, and chaperones	K07304	O	25 kDa					7.5314e-05		0		7.5314e-05			0	1
Transcription elongation factor GreA	G5B5_09275	Information storage and processing	Transcription	K03624	K	18 kDa	0.0019326	0.0021391	0.001689	0.0017026	0.0014835	0.0015673	0	0.00192023	0.00158447	0.825143	-0.277284	3	3
Oxalate decarboxylase OxdD	G5B5_06575	Metabolism	Carbohydrate transport and metabolism	K01569	G	48 kDa	8.0919e-05	6.7174e-05	0.00012376	0.00018902	0.00018117	0.00026317	1	9.06177e-05	0.00021112	2.32979	1.2202	3	3
2,3-bisphosphoglycerate-dependent phosphoglycerate mutase	G5B5_13980	Cellular processing and signaling	Signal transduction mechanisms	K08296	T	20 kDa					0.00019632		0		0.00019632			0	1
Transcription termination/antitermination protein NusG	G5B5_05295	Information storage and processing	Transcription	K02601	K	25 kDa	0.0011277	0.0010253	0.0017247	0.0015429	0.0013626	0.0011431	0	0.00129257	0.00134953	1.04407	0.0622219	3	3
Transcriptional regulator KdgR	G5B5_12570	Information storage and processing	Transcription	K19333	K	31 kDa	6.4085e-05	0.0001064	7.8411e-05	5.9879e-05	9.5655e-05		0	8.29653e-05	7.7767e-05	0.937343	-0.0933506	3	2
Oxygen regulatory protein NreC	G5B5_16570	Cellular processing and signaling	Signal transduction mechanisms	-	T	27 kDa				6.6157e-05			0		6.6157e-05			0	1
KDP operon transcriptional regulatory protein KdpE	G5B5_16680	Cellular processing and signaling	Signal transduction mechanisms	K07667	T	26 kDa				7.1335e-05			0		7.1335e-05			0	1
contamination	K1H1_HUMAN	Cellular processing and signaling	Cytoskeleton	-	-	47 kDa			7.7469e-05				0	7.7469e-05				1	0
contamination	K1H4_HUMAN	Cellular processing and signaling	Cytoskeleton	-	-	45 kDa			5.4529e-05				0	5.4529e-05				1	0
contamination	K1HB_HUMAN	Cellular processing and signaling	Cytoskeleton	-	-	46 kDa			0.00021272				0	0.00021272				1	0
contamination	KRHB3_HUMAN	Cellular processing and signaling	Cytoskeleton	-	-	54 kDa			6.5369e-05				0	6.5369e-05				1	0
contamination	KRHB4_HUMAN	Cellular processing and signaling	Cytoskeleton	-	-	65 kDa				4.1017e-05			0		4.1017e-05			0	1
DNA polymerase III subunit alpha	G5B5_01200	Information storage and processing	Replication, recombination and repair	K02337,K14162	L	130 kDa		1.6569e-05					0	1.6569e-05				1	0
hypothetical protein	G5B5_01995	Information storage and processing	Transcription	-	K	27 kDa				6.6967e-05			0		6.6967e-05			0	1
Transcriptional regulator MraZ	G5B5_05155	Poorly characterized	Function unknown	K03925	S	16 kDa	0.001877	0.0024797	0.002593	0.0026591	0.0023498	0.0024347	0	0.00231657	0.0024812	1.07107	0.0990498	3	3
Antitoxin HigA1	G5B5_02745	Information storage and processing	Transcription	K15773	K	12 kDa				0.00023			0		0.00023			0	1
HTH-type transcriptional repressor NemR	G5B5_03210	Information storage and processing	Transcription	K16137	K	21 kDa					9.0533e-05		0		9.0533e-05			0	1
Alpha-1,4-glucan:maltose-1-phosphate maltosyltransferase 1	G5B5_06075	Metabolism	Carbohydrate transport and metabolism	K16147	G	78 kDa	2.5709e-05	2.8456e-05		9.6088e-05	3.8374e-05		1	2.70825e-05	6.7231e-05	2.48245	1.31177	2	2
Non-homologous end joining protein Ku	G5B5_03790	Information storage and processing	Replication, recombination and repair	K10979	L	35 kDa				5.2926e-05			0		5.2926e-05			0	1
Transcription-repair-coupling factor	G5B5_09975	Information storage and processing	Replication, recombination and repair	K03723	L	143 kDa	1.3665e-05	6.8063e-05		1.9152e-05	4.0793e-05	3.2322e-05	0	4.0864e-05	3.07557e-05	0.752635	-0.409978	2	3
Transcriptional repressor NrdR	G5B5_03925	Information storage and processing	Transcription	K07738	K	19 kDa		0.00011924					0	0.00011924				1	0
hypothetical protein	G5B5_04280	Information storage and processing	Replication, recombination and repair	K07473	L	12 kDa				0.00015478			0		0.00015478			0	1
Transketolase	G5B5_10515	Metabolism	Carbohydrate transport and metabolism	K00615	G	72 kDa	0.0083037	0.0083128	0.009804	0.0084876	0.0086575	0.0070056	0	0.00880683	0.00805023	0.914089	-0.129593	3	3
HTH-type transcriptional activator CmpR	G5B5_06620	Information storage and processing	Transcription	-	K	39 kDa					4.9639e-05		0		4.9639e-05			0	1
hypothetical protein	G5B5_09185	Cellular processing and signaling	Defense mechanisms	-	V	26 kDa	0.00011208	0.00012406	0.00022856	0.00048872	0.00037176	0.00030929	1	0.0001549	0.000389923	2.51726	1.33185	3	3
Trehalase	G5B5_04455	Metabolism	Carbohydrate transport and metabolism	K01178	G	67 kDa	0.00016286	0.00021304	0.00030796	0.00023518	0.00030939	0.00029767	0	0.000227953	0.000280747	1.2316	0.30053	3	3
Trigger factor	G5B5_14930	Cellular processing and signaling	Post-translational modification, protein turnover, and chaperones	K01802,K03545	O	54 kDa	0.00082654	0.00085387	0.00096636	0.0011499	0.00082247	0.0010861	0	0.000882257	0.00101949	1.15555	0.208577	3	3
Stage 0 sporulation protein J	G5B5_08960	Information storage and processing	Transcription	K03497	K	33 kDa				8.1491e-05			0		8.1491e-05			0	1
Triosephosphate isomerase	G5B5_02280	Metabolism	Carbohydrate transport and metabolism	K01803	G	27 kDa	0.0001763	0.00011708	0.00021571	0.00013178	0.00010526	0.0001668	0	0.000169697	0.000134613	0.793259	-0.334137	3	3
CCA-adding enzyme	G5B5_10430	Information storage and processing	Translation, ribosomal structure and biogenesis	K00970,K00974	J	53 kDa		4.0407e-05					0	4.0407e-05				1	0
DNA polymerase I	G5B5_11580	Information storage and processing	Replication, recombination and repair	K02335,K03469,K06966	L	113 kDa		2.7925e-05					0	2.7925e-05				1	0
putative HTH-type transcriptional regulator YtcD	G5B5_11785	Information storage and processing	Transcription	-	K	13 kDa				0.00021974			0		0.00021974			0	1
Type-4 uracil-DNA glycosylase	G5B5_13745	Information storage and processing	Replication, recombination and repair	K02334	L	23 kDa						9.6142e-05	0		9.6142e-05			0	1
tRNA N6-adenosine threonylcarbamoyltransferase	G5B5_16035	Cellular processing and signaling	Post-translational modification, protein turnover, and chaperones	K14742	O	23 kDa	0.00016036	0.00013312	0.00024526	0.00011238	0.00015957	0.00023706	0	0.00017958	0.00016967	0.944816	-0.0818952	3	3
hypothetical protein	G5B5_14745	Information storage and processing	Transcription	-	K	15 kDa				0.00011804			0		0.00011804			0	1
Tyrosine recombinase XerC	G5B5_16070	Information storage and processing	Replication, recombination and repair	-	L	39 kDa					5.0793e-05		0		5.0793e-05			0	1
Single-stranded-DNA-specific exonuclease RecJ	G5B5_16770	Information storage and processing	Replication, recombination and repair	K07462	L	66 kDa		3.1603e-05					0	3.1603e-05				1	0
contamination	ENO1_YEAST	Metabolism	Carbohydrate transport and metabolism	-	-	47 kDa	0.00054245						0	0.00054245				1	0
Threonine-phosphate decarboxylase	G5B5_00255	Metabolism	Amino acid transport and metabolism	K00817,K04720	E	40 kDa					4.8135e-05		0		4.8135e-05			0	1
Bifunctional adenosylcobalamin biosynthesis protein CobU	G5B5_00310	Metabolism	Coenzyme transport and metabolism	K02231,K02232	H	20 kDa					0.00014016		0		0.00014016			0	1
Fe(3+) dicitrate transport ATP-binding protein FecE	G5B5_00330	Metabolism	Inorganic ion transport and metabolism	K02013	P	29 kDa					6.8521e-05		0		6.8521e-05			0	1
tRNA uridine 5-carboxymethylaminomethyl modification enzyme MnmG	G5B5_08360	Cellular processing and signaling	Cell cycle control, cell division, chromosome partitioning	K03495	D	74 kDa	9.0379e-05	0.00022865	0.00020537	0.0001327	0.00016702	0.00010689	0	0.0001748	0.000135537	0.775383	-0.367019	3	3
tRNA(fMet)-specific endonuclease VapC	G5B5_05810	Poorly characterized	Function unknown	-	S	16 kDa	0.0003633	0.00080423	0.00066676	0.00079206	0.00060251	0.00050127	0	0.00061143	0.000631947	1.03356	0.0476155	3	3
malonic semialdehyde reductase RutE	G5B5_02180	Metabolism	Energy production and conversion	-	C	22 kDa			0.00010532				0	0.00010532				1	0
Phosphoglycerate kinase	G5B5_02275	Metabolism	Carbohydrate transport and metabolism	K00927,K01803	G	44 kDa		4.6946e-05					0	4.6946e-05				1	0
3-octaprenyl-4-hydroxybenzoate carboxy-lyase	G5B5_02405	Metabolism	Coenzyme transport and metabolism	K03182	H	58 kDa						3.9331e-05	0		3.9331e-05			0	1
Vitamin B12 import ATP-binding protein BtuD	G5B5_02800	Metabolism	Inorganic ion transport and metabolism	K02049,K10831	P	48 kDa				3.7036e-05			0		3.7036e-05			0	1
Demethylmenaquinone methyltransferase	G5B5_04420	Metabolism	Coenzyme transport and metabolism	K03183	H	32 kDa				5.7771e-05			0		5.7771e-05			0	1
Acetylxylan esterase	G5B5_04705	Metabolism	Lipid transport and metabolism	-	I	34 kDa					5.5824e-05		0		5.5824e-05			0	1
tRNA-modifying protein YgfZ	G5B5_02490	Poorly characterized	Function unknown	K00605,K06980	S	36 kDa	0.00018023	0.00011399	0.00012601	0.00012029	0.0001281	0.0001827	0	0.000140077	0.000143697	1.02584	0.0368099	3	3
tRNA-specific adenosine deaminase	G5B5_08785	Metabolism	Nucleotide transport and metabolism	K01485	F	19 kDa	0.0005226	0.00063629	0.00051154	0.00053713	0.00041602	0.00080348	0	0.00055681	0.000585543	1.0516	0.0725908	3	3
Sulfur carrier protein CysO	G5B5_05440	Metabolism	Coenzyme transport and metabolism	-	H	11 kDa				0.00075338			0		0.00075338			0	1
Tryptophan synthase alpha chain	G5B5_07605	Metabolism	Amino acid transport and metabolism	K00571,K01695	E	27 kDa	0.00030627	0.000226	0.00033309	0.00022257	0.0002709	0.00028172	0	0.000288453	0.000258397	0.895801	-0.15875	3	3
Tryptophan synthase beta chain	G5B5_07610	Metabolism	Amino acid transport and metabolism	K01696	E	44 kDa	8.442e-05	0.00014016	0.00018076	7.888e-05	0.00010501	9.984e-05	0	0.000135113	9.45767e-05	0.69998	-0.514614	3	3
hypothetical protein	G5B5_06185	Metabolism	Carbohydrate transport and metabolism	-	G	125 kDa				1.443e-05			0		1.443e-05			0	1
Tryptophan synthase beta chain	G5B5_03900	Metabolism	Amino acid transport and metabolism	K01733	E	46 kDa	0.00047071	0.00049835	0.00037561	0.00043981	0.00042766	0.00041146	0	0.000448223	0.00042631	0.951111	-0.0723149	3	3
Beta-galactosidase BglY	G5B5_07260	Metabolism	Carbohydrate transport and metabolism	K12308	G	77 kDa					3.815e-05		0		3.815e-05			0	1
Ferrichrome outer membrane transporter/phage receptor	G5B5_07335	Metabolism	Inorganic ion transport and metabolism	K02014,K16090	P	90 kDa					2.1413e-05		0		2.1413e-05			0	1
Indole-3-glycerol phosphate synthase	G5B5_07630	Metabolism	Amino acid transport and metabolism	K01609,K13498	E	29 kDa				6.032e-05			0		6.032e-05			0	1
Tryptophan synthase beta chain	G5B5_14885	Metabolism	Amino acid transport and metabolism	K01733	E	48 kDa	7.8042e-05	4.319e-05		7.292e-05	5.8243e-05	6.9222e-05	0	6.0616e-05	6.6795e-05	1.10194	0.140041	2	3
Tryptophan--tRNA ligase	G5B5_10385	Information storage and processing	Translation, ribosomal structure and biogenesis	K01867	J	42 kDa					4.647e-05	5.5231e-05	0		5.08505e-05			0	2
hypothetical protein	G5B5_09040	Metabolism	Secondary metabolites biosynthesis, transport, and catabolism	-	Q	30 kDa				5.9879e-05			0		5.9879e-05			0	1
Type 2 topoisomerase subunit B	G5B5_07415	Information storage and processing	Replication, recombination and repair	K02470	L	98 kDa	0.00014982	0.00027639	8.5547e-05	0.00017732	0.00016896	8.2689e-05	0	0.000170586	0.00014299	0.838228	-0.254586	3	3
NAD-dependent malic enzyme	G5B5_09825	Metabolism	Energy production and conversion	K00027,K00029	C	62 kDa						3.6305e-05	0		3.6305e-05			0	1
Phosphoenolpyruvate carboxylase	G5B5_10095	Metabolism	Energy production and conversion	K01595	C	113 kDa		3.8184e-05					0	3.8184e-05				1	0
hypothetical protein	G5B5_10365	Metabolism	Nucleotide transport and metabolism	-	F	41 kDa				6.6515e-05			0		6.6515e-05			0	1
6-phosphogluconolactonase	G5B5_11695	Metabolism	Carbohydrate transport and metabolism	K07404	G	42 kDa				4.1432e-05			0		4.1432e-05			0	1
hypothetical protein	G5B5_10245	unclassified	unclassified	-	-	24 kDa	0.00019598	8.6766e-05	0.00014387	0.00025636	0.00035102	0.0005099	1	0.000142205	0.000372427	2.61894	1.38898	3	3
Xylan 1,4-beta-xylosidase	G5B5_12645	Metabolism	Carbohydrate transport and metabolism	K05349	G	98 kDa				2.7375e-05			0		2.7375e-05			0	1
UDP-glucose 4-epimerase	G5B5_13030	Cellular processing and signaling	Cell wall/membrane/envelope biogenesis	K01784	M	36 kDa	0.00037937	0.00026994	0.00046417	0.00043043	0.00053929	0.00041662	0	0.00037116	0.000462113	1.24505	0.316205	3	3
Blue-light-activated protein	G5B5_13570	Cellular processing and signaling	Signal transduction mechanisms	-	T	14 kDa	0.0017283	0.00061215	0.0017763	0.0037465	0.0035771	0.0035974	1	0.00137225	0.00364033	2.65282	1.40753	3	3
hypothetical protein	G5B5_12725	Metabolism	Inorganic ion transport and metabolism	-	P	124 kDa				1.4292e-05			0		1.4292e-05			0	1
Beta-galactosidase	G5B5_12750	Metabolism	Carbohydrate transport and metabolism	K01190,K12308	G	68 kDa					2.8457e-05		0		2.8457e-05			0	1
Protein YciF	G5B5_02385	Poorly characterized	Function unknown	-	S	18 kDa	0.0059224	0.0070727	0.0086447	0.021067	0.014733	0.02519	1	0.00721327	0.02033	2.81842	1.49489	3	3
UDP-N-acetylglucosamine 4-epimerase	G5B5_09850	Cellular processing and signaling	Cell wall/membrane/envelope biogenesis	K01784,K02473	M	36 kDa	0.00028829	0.0003481	0.00035273	0.00026937	0.00039118	0.00027896	0	0.000329707	0.00031317	0.949844	-0.074237	3	3
3'-5' exoribonuclease YhaM	G5B5_04470	Poorly characterized	Function unknown	K03698	S	38 kDa		8.5998e-05	9.5065e-05	0.00033879	0.00038657	0.00033692	1	9.05315e-05	0.000354093	3.91127	1.96764	2	3
hypothetical protein	G5B5_13300	Metabolism	Coenzyme transport and metabolism	K03148,K11996	H	37 kDa				4.7011e-05			0		4.7011e-05			0	1
UDP-N-acetylmuramoyl-tripeptide--D-alanyl-D-alanine ligase	G5B5_05130	Cellular processing and signaling	Cell wall/membrane/envelope biogenesis	K01929	M	49 kDa	0.00024866	0.0002964	0.00018723	0.00014298	0.00019034	0.00015835	0	0.000244097	0.00016389	0.671414	-0.574725	3	3
Glutamate-pyruvate aminotransferase AlaC	G5B5_14015	Metabolism	Amino acid transport and metabolism	K10206,K14261	E	44 kDa				4.1642e-05			0		4.1642e-05			0	1
hypothetical protein	G5B5_14590	Metabolism	Inorganic ion transport and metabolism	-	P	136 kDa		2.234e-05					0	2.234e-05				1	0
Ureidoglycolate lyase	G5B5_12580	Metabolism	Secondary metabolites biosynthesis, transport, and catabolism	K01826	Q	30 kDa	0.00050897	0.00042251	0.00081735	0.00047556	0.00050646	0.00041383	0	0.000582943	0.000465283	0.798162	-0.325246	3	3
Sulfur carrier protein CysO	G5B5_14890	Metabolism	Coenzyme transport and metabolism	K03636	H	11 kDa					0.0002702		0		0.0002702			0	1
Uricase	G5B5_05490	Metabolism	Secondary metabolites biosynthesis, transport, and catabolism	K00365,K16838	Q	32 kDa	0.00024559	0.00023785	0.00037561	0.00022947	0.00024438	0.00021783	0	0.00028635	0.00023056	0.805169	-0.312637	3	3
6-carboxy-5,6,7,8-tetrahydropterin synthase	G5B5_15410	Metabolism	Coenzyme transport and metabolism	K01737	H	16 kDa				0.00028094			0		0.00028094			0	1
Coenzyme F420:L-glutamate ligase	G5B5_15540	Metabolism	Energy production and conversion	-	C	22 kDa					8.9147e-05		0		8.9147e-05			0	1
All-trans-phytoene synthase	G5B5_16730	Metabolism	Lipid transport and metabolism	K02291	I	35 kDa					5.5824e-05		0		5.5824e-05			0	1
Uridylate kinase	G5B5_06870	Metabolism	Nucleotide transport and metabolism	K09903	F	25 kDa	0.00026264	0.00016612	0.00013772	0.00021035	0.00026135	0.00022187	0	0.000188827	0.00023119	1.22435	0.292016	3	3
Uronate isomerase	G5B5_13860	Metabolism	Carbohydrate transport and metabolism	K01812	G	54 kDa	0.0016065	0.0013646	0.00093709	0.0010996	0.0011896	0.0010825	0	0.00130273	0.0011239	0.862727	-0.213024	3	3
hypothetical protein	G5B5_00915	Poorly characterized	Function unknown	K19702	S	59 kDa				3.0383e-05			0		3.0383e-05			0	1
hypothetical protein	G5B5_01075	Poorly characterized	Function unknown	K03832	S	33 kDa				5.2418e-05			0		5.2418e-05			0	1
UTP--glucose-1-phosphate uridylyltransferase	G5B5_09985	Cellular processing and signaling	Cell wall/membrane/envelope biogenesis	K00963	M	32 kDa	0.00015034	0.00013312	0.00022073	0.00019666	0.00020944	0.00024892	0	0.000168063	0.00021834	1.29915	0.377571	3	3
hypothetical protein	G5B5_01760	Poorly characterized	Function unknown	K07114	S	37 kDa				4.883e-05			0		4.883e-05			0	1
2',3'-cyclic-nucleotide 2'-phosphodiesterase	G5B5_01955	Poorly characterized	Function unknown	K09769	S	25 kDa				0.00010341			0		0.00010341			0	1
UvrABC system protein A	G5B5_01060	Information storage and processing	Replication, recombination and repair	K03701	L	113 kDa	1.6917e-05	0.00014979	5.1745e-05	6.3225e-05	8.4166e-05		0	7.28173e-05	7.36955e-05	1.01206	0.0172946	3	2
hypothetical protein	G5B5_02975	Poorly characterized	Function unknown	-	S	14 kDa				0.00019688			0		0.00019688			0	1
hypothetical protein	G5B5_03140	Poorly characterized	Function unknown	-	S	16 kDa				0.00010384			0		0.00010384			0	1
Alanine--tRNA ligase	G5B5_03250	Poorly characterized	Function unknown	K01872	S	34 kDa						6.6347e-05	0		6.6347e-05			0	1
UvrABC system protein A	G5B5_03095	Information storage and processing	Replication, recombination and repair	K03701	L	116 kDa	4.1258e-05	0.0001096	2.0192e-05	6.168e-05	7.3899e-05		0	5.70167e-05	6.77895e-05	1.18894	0.249678	3	2
D-hydantoinase	G5B5_02010	Metabolism	Nucleotide transport and metabolism	K01464,K01465,K01466	F	51 kDa	3.7045e-05	4.1003e-05	4.5326e-05	0.00020768	0.00014745	0.00019715	1	4.11247e-05	0.000184093	4.47647	2.16236	3	3
Valine--tRNA ligase	G5B5_10600	Information storage and processing	Translation, ribosomal structure and biogenesis	K01873	J	106 kDa	4.6404e-05	0.00010273	0.00012491	8.6717e-05	0.00011082	5.488e-05	0	9.1348e-05	8.4139e-05	0.921082	-0.118598	3	3
hypothetical protein	G5B5_06285	Poorly characterized	Function unknown	K09803	S	12 kDa	0.00017559						0	0.00017559				1	0
Vitamin B12 transporter BtuB	G5B5_13525	Metabolism	Inorganic ion transport and metabolism	K02014,K16092	P	91 kDa	0.00017811	0.00022033	0.00012819	0.00011747	0.00022936	0.0001363	0	0.000175543	0.000161043	0.917399	-0.124378	3	3
hypothetical protein	G5B5_06530	Poorly characterized	Function unknown	-	S	68 kDa					2.7779e-05		0		2.7779e-05			0	1
hypothetical protein	G5B5_06595	Poorly characterized	Function unknown	-	S	34 kDa				7.9645e-05			0		7.9645e-05			0	1
hypothetical protein	G5B5_06640	Poorly characterized	Function unknown	-	S	121 kDa					1.6015e-05		0		1.6015e-05			0	1
Vitamin B12 transporter BtuB	G5B5_06560	Metabolism	Inorganic ion transport and metabolism	-	P	99 kDa	2.8505e-05	3.1551e-05	2.3252e-05	2.6635e-05	4.7275e-05		0	2.77693e-05	3.6955e-05	1.33078	0.412277	3	2
Vitamin B12 transporter BtuB	G5B5_00295	Metabolism	Inorganic ion transport and metabolism	K02014,K16092	P	91 kDa	3.106e-05	5.7298e-05		6.7717e-05	9.2722e-05	3.6734e-05	0	4.4179e-05	6.57243e-05	1.48768	0.573067	2	3
Cytokinin riboside 5'-monophosphate phosphoribohydrolase	G5B5_07950	Poorly characterized	Function unknown	K06966	S	18 kDa						0.00012435	0		0.00012435			0	1
Vitamin B12-dependent ribonucleotide reductase	G5B5_06780	Metabolism	Nucleotide transport and metabolism	K00525	F	119 kDa	3.1639e-05	7.0038e-05		9.6077e-05	0.00012593	5.6126e-05	0	5.08385e-05	9.2711e-05	1.82364	0.866819	2	3
Voltage-gated ClC-type chloride channel ClcB	G5B5_01375	Metabolism	Inorganic ion transport and metabolism	-	P	64 kDa	2.9561e-05	3.272e-05					0	3.11405e-05				2	0
hypothetical protein	G5B5_08440	Poorly characterized	Function unknown	K07146	S	28 kDa			8.8414e-05				0	8.8414e-05				1	0
hypothetical protein	G5B5_09000	Poorly characterized	Function unknown	K19701,K19702	S	64 kDa				4.1783e-05			0		4.1783e-05			0	1
hypothetical protein	G5B5_10200	Poorly characterized	Function unknown	-	S	16 kDa			0.00014135				0	0.00014135				1	0
Iron-sulfur cluster insertion protein ErpA	G5B5_10265	Poorly characterized	Function unknown	K13628	S	18 kDa		0.00011779					0	0.00011779				1	0
hypothetical protein	G5B5_11505	Poorly characterized	Function unknown	-	S	16 kDa		0.00013044					0	0.00013044				1	0
hypothetical protein	G5B5_11980	Poorly characterized	Function unknown	-	S	30 kDa	9.7192e-05						0	9.7192e-05				1	0
Xylan alpha-(1->gr|2)-glucuronosidase	G5B5_12650	Metabolism	Carbohydrate transport and metabolism	K01235	G	93 kDa				4.883e-05	3.1202e-05		0		4.0016e-05			0	2
hypothetical protein	G5B5_14535	Poorly characterized	Function unknown	-	S	27 kDa						8.7255e-05	0		8.7255e-05			0	1
hypothetical protein	G5B5_14550	Poorly characterized	Function unknown	-	S	9 kDa				0.00020768			0		0.00020768			0	1
hypothetical protein	G5B5_14680	Poorly characterized	Function unknown	-	S	146 kDa						1.5214e-05	0		1.5214e-05			0	1
hypothetical protein	G5B5_15050	Poorly characterized	Function unknown	-	S	26 kDa	0.00010751						0	0.00010751				1	0
Xylose isomerase	G5B5_13825	Metabolism	Carbohydrate transport and metabolism	K01820	G	44 kDa	0.00017516	0.00012117	0.00016073	0.00010229	0.00017429	0.00012947	0	0.000152353	0.00013535	0.888395	-0.170726	3	3
Oleate hydratase	G5B5_15560	Poorly characterized	Function unknown	K10254	S	59 kDa						5.8553e-05	0		5.8553e-05			0	1
Xylose isomerase	G5B5_01605	Metabolism	Carbohydrate transport and metabolism	K01805	G	49 kDa	0.00032072	0.00035499	0.00029431	0.0003184	0.00041887	0.00030818	0	0.00032334	0.000348483	1.07776	0.108038	3	3
hypothetical protein	G5B5_16110	Poorly characterized	Function unknown	-	S	67 kDa	2.8928e-05						0	2.8928e-05				1	0
hypothetical protein	G5B5_02885	unclassified	unclassified	-	-	7 kDa	0.00039312						0	0.00039312				1	0
Xylulose-5-phosphate phosphoketolase	G5B5_00995	Metabolism	Carbohydrate transport and metabolism	K01621	G	89 kDa	0.001349	0.0017257	0.0014206	0.0009092	0.0016065	0.00083695	0	0.00149843	0.00111755	0.745812	-0.423116	3	3
hypothetical protein	G5B5_13100	unclassified	unclassified	-	U, W	49 kDa	8.9225e-05						0	8.9225e-05				1	0
Ycf48-like protein	G5B5_15985	Poorly characterized	Function unknown	-	S	73 kDa	9.1049e-05	0.00010078	7.9573e-05	0.00010938	3.8829e-05	0.00012306	0	9.04673e-05	9.0423e-05	0.99951	-0.000707163	3	3

## Sheet: strain WH15
		Function (eggNOG mapper)					normalized spectrum abundance factor (NSAF)						t-test	mean NSAF		ratio	log2 ratio	replicate count
Identified Proteins	Accession Number	main role	subrole	KEGG	COG	Molecular Weight	WH15-1	WH15-2	WH15-3	WH15-4	WH15-5	WH15-6	significant	co	Mn	Mn/co	Mn/co	repl co	repl Mn	expression
Xyloglucanase	GWH15_14260	Poorly characterized	Function unknown	-	R	114 kDa	8.2772e-05	0.00016546	8.5109e-05	3.4416e-05	2.7058e-05		1	0.000111114	3.0737e-05	0.276627	-1.85399	3	2
Putative aliphatic sulfonates-binding protein	GWH15_04015	Metabolism	Inorganic ion transport and metabolism	-	-	37 kDa	0.00030478	0.00050771	0.00030864	0.00010561	8.3026e-05	0.00014885	1	0.00037371	0.000112495	0.301023	-1.73205	3	3
Glutamate racemase	GWH15_15465	Cellular processing and signaling	Cell wall/membrane/envelope biogenesis	K01776	M	29 kDa		0.00016324		5.1612e-05			0	0.00016324	5.1612e-05	0.316173	-1.66122	1	1
Prolyl tripeptidyl peptidase	GWH15_02455	Metabolism	Amino acid transport and metabolism	-	E	72 kDa	7.6766e-05	6.7304e-05	4.7838e-05	2.1279e-05			0	6.39693e-05	2.1279e-05	0.332644	-1.58795	3	1
Alpha-1,4-glucan:maltose-1-phosphate maltosyltransferase	GWH15_16210	Poorly characterized	Function unknown	-	G	136 kDa	0.00011256	0.00018505	4.6034e-05	5.8505e-05	2.2998e-05	4.1232e-05	0	0.000114548	4.09117e-05	0.357157	-1.48537	3	3
hypothetical protein	GWH15_13060	Poorly characterized	Function unknown	-	G	44 kDa	5.9125e-05	0.00012441		3.2779e-05			0	9.17675e-05	3.2779e-05	0.357196	-1.48521	2	1
UDP-N-acetylmuramate--L-alanyl-gamma-D-glutamyl-meso-2,6-diaminoheptandioate ligase	GWH15_01520	Cellular processing and signaling	Cell wall/membrane/envelope biogenesis	K02558	M	51 kDa	7.2167e-05	9.4909e-05	8.4324e-05	3.0007e-05			0	8.38e-05	3.0007e-05	0.358079	-1.48165	3	1
hypothetical protein	GWH15_17755	Unclassified	Unclassified	-	P	122 kDa	9.7145e-05	0.00011007	2.0955e-05	1.2428e-05	3.6642e-05	3.2847e-05	0	7.60567e-05	2.73057e-05	0.359017	-1.47787	3	3
3-oxoacyl-[acyl-carrier-protein] reductase FabG	GWH15_01375	Poorly characterized	Function unknown	K00059	I	26 kDa	0.00016474	0.00013866		5.48e-05			0	0.0001517	5.48e-05	0.361239	-1.46897	2	1
Acetylglutamate kinase	GWH15_07120	Metabolism	Amino acid transport and metabolism	K00930	E	27 kDa		0.00020719		5.459e-05		9.6182e-05	0	0.00020719	7.5386e-05	0.36385	-1.45859	1	2
GTPase Era	GWH15_17190	Poorly characterized	Function unknown	K03595	J	40 kDa	0.00024039	0.00025291	0.00015729	7.9962e-05	7.8582e-05		0	0.000216863	7.9272e-05	0.365539	-1.4519	3	2
N-acetyl-lysine deacetylase	GWH15_15380	Metabolism	Amino acid transport and metabolism	-	E	54 kDa	0.00023611	0.00026616	0.00022071	0.0001122	5.5132e-05	9.8843e-05	1	0.000240993	8.8725e-05	0.368164	-1.44158	3	3
ATP-dependent Clp protease ATP-binding subunit ClpX	GWH15_10420	Cellular processing and signaling	Post-translational modification, protein turnover, and chaperones	K03544	O	47 kDa	5.9816e-05	0.0001888		3.3162e-05		5.8428e-05	1	0.000124308	4.5795e-05	0.368399	-1.44066	2	2
Transcription-repair-coupling factor	GWH15_03540	Information storage and processing	Replication, recombination and repair	K03723	L	112 kDa	4.2457e-05	7.147e-05		2.1184e-05			0	5.69635e-05	2.1184e-05	0.371887	-1.42706	2	1
hypothetical protein	GWH15_14150	Unclassified	Unclassified	-	-	64 kDa	7.4078e-05	7.7937e-05	4.1547e-05	2.4641e-05			0	6.45207e-05	2.4641e-05	0.381909	-1.3887	3	1
putative chromosome-partitioning protein ParB	GWH15_19625	Information storage and processing	Transcription	K03497	D	33 kDa	8.5623e-05	0.00015014	0.0001334	4.7469e-05			0	0.000123054	4.7469e-05	0.385756	-1.37424	3	1
Ribosome-binding factor A	GWH15_02715	Information storage and processing	Translation, ribosomal structure and biogenesis	K02834	J	13 kDa	0.00028685	0.00030179	0.00033517	0.00011927			0	0.000307937	0.00011927	0.38732	-1.3684	3	1
hypothetical protein	GWH15_05765	Metabolism	Inorganic ion transport and metabolism	-	P	126 kDa	4.3319e-05	0.00012913	1.3498e-05	2.4016e-05			0	6.19823e-05	2.4016e-05	0.387465	-1.36786	3	1
hypothetical protein	GWH15_13385	Poorly characterized	Function unknown	-	S	37 kDa	0.00027773	0.00023907	0.00025961	0.00014697	8.2535e-05	7.3986e-05	1	0.000258803	0.000101164	0.39089	-1.35516	3	3
Alanine racemase	GWH15_19375	Cellular processing and signaling	Cell wall/membrane/envelope biogenesis	K01775	M	40 kDa	0.00029584	0.00035914	0.00021272	0.00013247	7.4391e-05	0.00013337	1	0.000289233	0.00011341	0.392107	-1.35068	3	3
UDP-N-acetylglucosamine 1-carboxyvinyltransferase	GWH15_17025	Cellular processing and signaling	Cell wall/membrane/envelope biogenesis	K00790	M	46 kDa		0.00018968	0.0001498	6.6635e-05			0	0.00016974	6.6635e-05	0.392571	-1.34897	2	1
hypothetical protein	GWH15_13650	Unclassified	Unclassified	-	-	57 kDa		6.7003e-05		2.648e-05			0	6.7003e-05	2.648e-05	0.395206	-1.33932	1	1
DNA polymerase III subunit alpha	GWH15_09460	Information storage and processing	Replication, recombination and repair	K02337	L	131 kDa		4.5925e-05		1.815e-05			0	4.5925e-05	1.815e-05	0.39521	-1.33931	1	1
UvrABC system protein A	GWH15_11185	Information storage and processing	Replication, recombination and repair	K03701	L	116 kDa	0.00024244	0.00028057	0.00012086	0.00010753	0.00010567	4.7362e-05	1	0.000214623	8.6854e-05	0.404681	-1.30514	3	3
Peptide methionine sulfoxide reductase MsrA 3	GWH15_19405	Cellular processing and signaling	Post-translational modification, protein turnover, and chaperones	K07304	O	25 kDa	0.00014841	0.00015615		6.171e-05			0	0.00015228	6.171e-05	0.40524	-1.30315	2	1
hypothetical protein	GWH15_19610	Poorly characterized	Function unknown	-	S	27 kDa	0.00018313	0.0001156		6.0916e-05			0	0.000149365	6.0916e-05	0.407833	-1.29395	2	1
Galactose-1-phosphate uridylyltransferase	GWH15_17800	Metabolism	Carbohydrate transport and metabolism	K00965	G	40 kDa	0.00014629	0.00017957	0.00015954	6.0828e-05		7.1449e-05	1	0.0001618	6.61385e-05	0.408767	-1.29065	3	2
hypothetical protein	GWH15_15990	Poorly characterized	Function unknown	K06182	-	78 kDa	0.00047603	0.00028096	0.00028218	0.00021242	0.00015182	6.8047e-05	1	0.00034639	0.000144096	0.415993	-1.26537	3	3
Multifunctional 2-oxoglutarate metabolism enzyme	GWH15_15970	Metabolism	Energy production and conversion	K00164	C	96 kDa	0.0002571	0.00037453	0.00026806	0.00022203	8.0813e-05	7.2443e-05	1	0.000299897	0.000125095	0.417128	-1.26144	3	3
23S rRNA (guanosine-2'-O-)-methyltransferase RlmB	GWH15_01985	Information storage and processing	Translation, ribosomal structure and biogenesis	K03218	J	29 kDa	0.00012833	0.00013501	0.00011996	5.3358e-05			0	0.000127767	5.3358e-05	0.417621	-1.25974	3	1
Glucose-1-phosphate thymidylyltransferase 1	GWH15_01030	Cellular processing and signaling	Cell wall/membrane/envelope biogenesis	K00973	M	32 kDa	0.0001173	0.00012341	0.00010965	4.8774e-05			0	0.000116787	4.8774e-05	0.417633	-1.25969	3	1
hypothetical protein	GWH15_14005	Poorly characterized	Function unknown	-	-	48 kDa		8.1994e-05	7.285e-05	3.2405e-05			0	7.7422e-05	3.2405e-05	0.41855	-1.25653	2	1
Transcriptional regulator KdgR	GWH15_06425	Information storage and processing	Transcription	-	-	33 kDa	0.00011493	9.0691e-05	0.00013429	4.7789e-05			0	0.000113304	4.7789e-05	0.421778	-1.24544	3	1
Lon protease 1	GWH15_10430	Cellular processing and signaling	Post-translational modification, protein turnover, and chaperones	K01338	O	89 kDa	0.00014805	0.00016688	8.8963e-05	7.9145e-05	3.4568e-05		0	0.000134631	5.68565e-05	0.422314	-1.24361	3	2
hypothetical protein	GWH15_12815	Poorly characterized	Function unknown	-	-	106 kDa	0.00033431	0.00038876	0.00022204	0.00024875	0.00011504	3.8671e-05	0	0.000315037	0.000134154	0.425835	-1.23163	3	3
hypothetical protein	GWH15_04000	Metabolism	Inorganic ion transport and metabolism	-	-	117 kDa	0.00024893	0.00034375	0.00013816	0.00011644	0.00012715	6.8388e-05	1	0.000243613	0.000103993	0.426876	-1.22811	3	3
Tryptophan synthase beta chain	GWH15_00825	Metabolism	Amino acid transport and metabolism	K01696	E	43 kDa	0.00018778	0.00013171	7.8015e-05	5.2054e-05		6.1142e-05	0	0.000132502	5.6598e-05	0.427149	-1.22719	3	2
UvrABC system protein A	GWH15_12720	Information storage and processing	Replication, recombination and repair	K03701	L	109 kDa	0.00019806	0.0002718	0.00018514	0.00016471	8.445e-05	3.7852e-05	1	0.000218333	9.56707e-05	0.438186	-1.19038	3	3
Tyrosine-protein kinase YwqD	GWH15_06975	Cellular processing and signaling	Cell wall/membrane/envelope biogenesis	K16692	M	83 kDa	0.00015699	0.00017697		7.4603e-05			0	0.00016698	7.4603e-05	0.446778	-1.16237	2	1
Acyl carrier protein	GWH15_03100	Unclassified	Unclassified	K02078	I	9 kDa	0.0010802		0.00070683	0.00044916	0.00035312		1	0.000893515	0.00040114	0.448946	-1.15539	2	2
ECF RNA polymerase sigma factor SigW	GWH15_06020	Information storage and processing	Transcription	K03088	K	23 kDa	0.00021019	0.00017691	7.8592e-05	6.9918e-05			0	0.000155231	6.9918e-05	0.450414	-1.15068	3	1
hypothetical protein	GWH15_17175	Metabolism	Carbohydrate transport and metabolism	-	G	34 kDa		0.00017662	0.00023539	9.3071e-05			0	0.000206005	9.3071e-05	0.45179	-1.14628	2	1
Alpha-ketoglutaric semialdehyde dehydrogenase	GWH15_14335	Metabolism	Energy production and conversion	K14519	C	55 kDa	0.00029148	0.00040888	0.00042383	0.00025586	0.0001588	9.4904e-05	1	0.00037473	0.000169855	0.453272	-1.14155	3	3
Phenylalanine--tRNA ligase alpha subunit	GWH15_02955	Information storage and processing	Translation, ribosomal structure and biogenesis	K01889	J	41 kDa	4.5758e-05	0.00012035	8.5545e-05	3.8052e-05			0	8.38843e-05	3.8052e-05	0.453625	-1.14043	3	1
Bifunctional protein GlmU	GWH15_07835	Cellular processing and signaling	Cell wall/membrane/envelope biogenesis	K04042	M	49 kDa	5.4471e-05	7.6412e-05	6.789e-05	3.0199e-05			0	6.62577e-05	3.0199e-05	0.455781	-1.13359	3	1
Putative acid--amine ligase YgiC	GWH15_16090	Metabolism	Amino acid transport and metabolism	K01917	E	44 kDa	8.6418e-05	0.00018184	0.00014137	5.3899e-05	7.0624e-05		0	0.000136543	6.22615e-05	0.455986	-1.13294	3	2
hypothetical protein	GWH15_05290	Unclassified	Unclassified	-	M	56 kDa	0.00023749	0.00013326	0.000148	7.8998e-05			0	0.000172917	7.8998e-05	0.456856	-1.13019	3	1
Threonine synthase	GWH15_17270	Metabolism	Amino acid transport and metabolism	K01733	E	45 kDa	0.00065019	0.00066269	0.0007977	0.00040552	0.00023247	0.00032748	1	0.000703527	0.000321823	0.457443	-1.12834	3	3
Glutamyl-tRNA(Gln) amidotransferase subunit A	GWH15_06265	Information storage and processing	Translation, ribosomal structure and biogenesis	K02433	J	46 kDa	0.00011798	0.00014481	0.00011028	4.9055e-05	6.4278e-05	5.762e-05	1	0.000124357	5.69843e-05	0.458233	-1.12585	3	3
DNA topoisomerase 1	GWH15_02290	Information storage and processing	Replication, recombination and repair	K03168	L	104 kDa	0.00016411	0.00014388	0.00014488	0.00015164	2.9804e-05	2.6717e-05	0	0.000150957	6.9387e-05	0.459648	-1.1214	3	3
hypothetical protein	GWH15_02885	Unclassified	Unclassified	-	-	15 kDa	0.00018687	0.00026214		0.0001036			0	0.000224505	0.0001036	0.46146	-1.11572	2	1
Xyloglucanase Xgh74A	GWH15_14265	Poorly characterized	Function unknown	-	R	117 kDa	7.983e-05	0.00012598	9.7008e-05	5.3109e-05	5.2192e-05	3.509e-05	1	0.000100939	4.6797e-05	0.463615	-1.109	3	3
hypothetical protein	GWH15_13080	Poorly characterized	Function unknown	-	S	27 kDa	0.00023244	0.00013974	0.0001552	8.284e-05			0	0.000175793	8.284e-05	0.471235	-1.08548	3	1
Outer membrane protein OprM	GWH15_09420	Cellular processing and signaling	Cell wall/membrane/envelope biogenesis	-	M	52 kDa		7.4202e-05	4.9445e-05	2.9325e-05			0	6.18235e-05	2.9325e-05	0.474334	-1.07602	2	1
Signal recognition particle receptor FtsY	GWH15_02175	Cellular processing and signaling	Intracellular trafficking, secretion, and vesicular transport	K03110	U	36 kDa		0.00010817	7.2082e-05	4.2751e-05			0	9.0126e-05	4.2751e-05	0.474347	-1.07599	2	1
Beta-hexosaminidase	GWH15_11400	Metabolism	Carbohydrate transport and metabolism	-	G	79 kDa	9.4688e-05	7.4716e-05	7.7447e-05	3.9371e-05	3.8692e-05		1	8.22837e-05	3.90315e-05	0.474353	-1.07597	3	2
Fumarate reductase flavoprotein subunit	GWH15_12565	Metabolism	Energy production and conversion	K00239	C	65 kDa	0.00027528	0.00021341	0.00023024	0.00020483	9.4726e-05	4.2457e-05	1	0.000239643	0.000114004	0.475725	-1.0718	3	3
50S ribosomal protein L18	GWH15_02575	Information storage and processing	Translation, ribosomal structure and biogenesis	K02881	J	13 kDa	0.0015516	0.0015582	0.0017141	0.0011144	0.00057638	0.00062002	1	0.00160797	0.000770267	0.479031	-1.06181	3	3
Phosphoribosylformylglycinamidine synthase subunit PurL	GWH15_00875	Metabolism	Nucleotide transport and metabolism	K01952	F	87 kDa	0.00042617	0.00049212	0.00034007	0.00032847	0.00016989	0.00010661	1	0.000419453	0.000201657	0.480761	-1.05661	3	3
Protein TolB	GWH15_12285	Cellular processing and signaling	Intracellular trafficking, secretion, and vesicular transport	K03641	U	48 kDa	0.00021	0.00024103	0.00021415	0.00011113	0.00012482	8.3917e-05	1	0.000221727	0.000106622	0.480873	-1.05627	3	3
UDP-N-acetylenolpyruvoylglucosamine reductase	GWH15_12280	Cellular processing and signaling	Cell wall/membrane/envelope biogenesis	K00075	M	37 kDa		7.8989e-05	9.3572e-05	4.1623e-05			0	8.62805e-05	4.1623e-05	0.482415	-1.05165	2	1
hypothetical protein	GWH15_17475	Information storage and processing	Transcription	K03628	K	47 kDa	0.00034874	0.00032374	0.00030681	0.00025589	6.7059e-05	0.00015028	1	0.00032643	0.000157743	0.483237	-1.0492	3	3
Prolyl tripeptidyl peptidase	GWH15_17105	Metabolism	Amino acid transport and metabolism	K01303	E	78 kDa	0.00025099	0.00018862	0.00027931	0.00015903	0.00013675	5.2536e-05	1	0.00023964	0.000116105	0.484499	-1.04543	3	3
Phosphoribosylamine--glycine ligase	GWH15_03220	Metabolism	Nucleotide transport and metabolism	K01945	F	44 kDa		0.00012796	7.5791e-05	3.3713e-05	6.6263e-05		1	0.000101876	4.9988e-05	0.490677	-1.02715	2	2
hypothetical protein	GWH15_08475	Poorly characterized	Function unknown	-	R	46 kDa	0.00016955	0.00023784	0.00014088	9.3995e-05	9.2373e-05	8.2806e-05	1	0.000182757	8.97247e-05	0.490952	-1.02635	3	3
Serine/threonine-protein kinase PrkC	GWH15_09075	Cellular processing and signaling	Signal transduction mechanisms	K08884	R	93 kDa	3.0369e-05	8.5204e-05	3.7851e-05	2.5255e-05			0	5.11413e-05	2.5255e-05	0.493828	-1.01792	3	1
Prephenate dehydrogenase	GWH15_00845	Metabolism	Amino acid transport and metabolism	K04517	E	30 kDa		0.00025744		0.00012718			0	0.00025744	0.00012718	0.494018	-1.01736	1	1
GDP-L-fucose synthase	GWH15_12210	Cellular processing and signaling	Cell wall/membrane/envelope biogenesis	K02377	M	35 kDa	0.0002642	0.00044475	0.00032106	0.00021971	0.00021592	7.7422e-05	1	0.000343337	0.000171017	0.498104	-1.00548	3	3
UDP-N-acetylmuramoyl-L-alanyl-D-glutamate--2,6-diaminopimelate ligase	GWH15_14965	Cellular processing and signaling	Cell wall/membrane/envelope biogenesis	K01928	M	53 kDa	5.1616e-05	7.2406e-05	4.8248e-05	2.8616e-05			0	5.74233e-05	2.8616e-05	0.498334	-1.00482	3	1
Molybdenum-pterin-binding protein 2	GWH15_19360	Poorly characterized	Function unknown	-	H	15 kDa	0.00031607	0.00046555	0.00047271	0.00021027			0	0.00041811	0.00021027	0.502906	-0.99164	3	1
Glycine--tRNA ligase alpha subunit	GWH15_14365	Information storage and processing	Translation, ribosomal structure and biogenesis	K01878	J	36 kDa	0.00034668	0.00050503	0.00037392	0.00015524	0.00030512	0.0001563	1	0.000408543	0.000205553	0.503137	-0.990976	3	3
hypothetical protein	GWH15_13275	Unclassified	Unclassified	-	-	49 kDa	0.0001688	0.00013813	0.00014026	0.00010918	6.1311e-05	5.4961e-05	1	0.000149063	7.51507e-05	0.504153	-0.988068	3	3
Sensor protein ZraS	GWH15_05470	Cellular processing and signaling	Signal transduction mechanisms	K00936	T	54 kDa	5.2462e-05	0.00022078	0.00011442	8.7254e-05	5.7165e-05	5.1244e-05	0	0.000129221	6.5221e-05	0.504726	-0.986428	3	3
2,3-dehydroadipyl-CoA hydratase	GWH15_02875	Metabolism	Lipid transport and metabolism	K13766	I	28 kDa	0.00046129	0.00045065	0.00036959	0.0001918	0.00021542	0.00024138	1	0.000427177	0.0002162	0.506114	-0.982466	3	3
Trehalose synthase/amylase TreS	GWH15_13930	Metabolism	Carbohydrate transport and metabolism	K05343	G	139 kDa	3.4026e-05	4.2959e-05		1.6978e-05	2.2246e-05		1	3.84925e-05	1.9612e-05	0.509502	-0.972841	2	2
Ribosomal protein S12 methylthiotransferase RimO	GWH15_12385	Metabolism	Energy production and conversion	K00599	R	56 kDa	0.00053336	0.00063356	0.00048248	0.00038631	0.00025309	0.00020167	1	0.0005498	0.000280357	0.509925	-0.971644	3	3
Molybdate-binding periplasmic protein	GWH15_12265	Metabolism	Inorganic ion transport and metabolism	K02020	P	28 kDa	9.9616e-05	6.9871e-05	0.0001552	5.5227e-05			0	0.000108229	5.5227e-05	0.510279	-0.970641	3	1
Soluble aldose sugar dehydrogenase YliI	GWH15_13180	Metabolism	Carbohydrate transport and metabolism	-	G	44 kDa	0.00042038	0.00050863	0.0004519	0.00027967	0.00024049	0.00018478	1	0.000460303	0.00023498	0.510489	-0.970047	3	3
Magnesium-chelatase 38 kDa subunit	GWH15_10625	Metabolism	Coenzyme transport and metabolism	K03405	H	57 kDa	0.00018157	6.9465e-05	0.00010801	6.8633e-05	5.3959e-05		0	0.000119682	6.1296e-05	0.512159	-0.965337	3	2
Lipopolysaccharide assembly protein B	GWH15_17850	Poorly characterized	Function unknown	-	R	59 kDa	0.00010921	0.00022979	0.00024792	0.00015569	7.6499e-05	6.8576e-05	0	0.00019564	0.000100255	0.512446	-0.964527	3	3
hypothetical protein	GWH15_17185	Unclassified	Unclassified	-	P	98 kDa	8.3483e-05	7.8073e-05	7.8036e-05	3.8569e-05	3.0322e-05	5.4364e-05	1	7.9864e-05	4.1085e-05	0.514437	-0.958934	3	3
Beta-barrel assembly-enhancing protease	GWH15_10620	Unclassified	Unclassified	-	R	11 kDa	0.00087079		0.0013024	0.00086898	0.00042699	0.00038276	0	0.0010866	0.000559577	0.514982	-0.957407	2	3
putative adenylyltransferase/sulfurtransferase MoeZ	GWH15_13830	Unclassified	Unclassified	K11996	P	44 kDa	0.00053985	0.00076458	0.00054345	0.00044894	0.00020363	0.00030422	1	0.00061596	0.00031893	0.517777	-0.949597	3	3
Acyl-CoA dehydrogenase	GWH15_16250	Metabolism	Lipid transport and metabolism	K09478	I	42 kDa	8.8433e-05	0.00016282	6.1998e-05	3.677e-05	7.2271e-05		0	0.000104417	5.45205e-05	0.522142	-0.937486	3	2
Outer membrane protein assembly factor BamA	GWH15_00705	Cellular processing and signaling	Cell wall/membrane/envelope biogenesis	K07277	M	111 kDa	0.00014265	0.00018539	9.4124e-05	7.6758e-05	8.2291e-05	6.1473e-05	1	0.000140721	7.35073e-05	0.522361	-0.936881	3	3
Alpha-1,4-glucan:maltose-1-phosphate maltosyltransferase 1	GWH15_13925	Metabolism	Carbohydrate transport and metabolism	K16147	G	77 kDa	8.7848e-05	0.00010563	0.00010558	5.2181e-05			0	9.9686e-05	5.2181e-05	0.523454	-0.933866	3	1
dTDP-4-dehydrorhamnose reductase	GWH15_01035	Cellular processing and signaling	Cell wall/membrane/envelope biogenesis	K00067	M	34 kDa	0.00019332	0.00031962	0.00028397	0.00016077	0.00013542	0.00012139	1	0.000265637	0.000139193	0.523999	-0.932364	3	3
GTP-binding protein TypA/BipA	GWH15_18675	Cellular processing and signaling	Signal transduction mechanisms	K06207	T	44 kDa	0.00062025	0.00067507	0.00043984	0.00044465	0.00027967	0.00018802	0	0.000578387	0.000304113	0.525796	-0.927425	3	3
tRNA N6-adenosine threonylcarbamoyltransferase	GWH15_02110	Cellular processing and signaling	Post-translational modification, protein turnover, and chaperones	K01409	J	39 kDa		7.1827e-05		3.7849e-05			0	7.1827e-05	3.7849e-05	0.526947	-0.924271	1	1
Inosine-5'-monophosphate dehydrogenase	GWH15_02690	Metabolism	Nucleotide transport and metabolism	K00088	T	55 kDa	0.0017807	0.002439	0.0020414	0.0011176	0.0013729	0.00081224	1	0.00208703	0.00110091	0.527502	-0.922753	3	3
contamination	K1C15_SHEEP	Unclassified	Unclassified	-	-	49 kDa		0.00043604	0.00033458	0.00020366			0	0.00038531	0.00020366	0.528561	-0.919857	2	1
Bifunctional protein HldE	GWH15_05195	Cellular processing and signaling	Cell wall/membrane/envelope biogenesis	K03272	M	52 kDa	3.4903e-05	0.00012853	8.1565e-05	4.3538e-05			0	8.1666e-05	4.3538e-05	0.533123	-0.90746	3	1
Outer membrane protein assembly factor BamA	GWH15_11460	Unclassified	Unclassified	-	-	47 kDa	7.8652e-05	0.00010344	9.1901e-05	4.9055e-05			0	9.1331e-05	4.9055e-05	0.537112	-0.896704	3	1
putative FAD-linked oxidoreductase	GWH15_07950	Metabolism	Energy production and conversion	K00104	C	53 kDa	5.1512e-05	5.4196e-05		2.8558e-05			0	5.2854e-05	2.8558e-05	0.540319	-0.888118	2	1
Sodium/glucose cotransporter	GWH15_11445	Cellular processing and signaling	Defense mechanisms	-	S	150 kDa	1.8313e-05	1.9267e-05		1.0153e-05			0	1.879e-05	1.0153e-05	0.540341	-0.888059	2	1
hypothetical protein	GWH15_18680	Cellular processing and signaling	Signal transduction mechanisms	K06207	T	23 kDa	0.00072116	0.00050582	0.00059921	0.00033318	0.00032743		1	0.00060873	0.000330305	0.542613	-0.882004	3	2
hypothetical protein	GWH15_10595	Metabolism	Carbohydrate transport and metabolism	K02438	G	82 kDa	9.3907e-05	0.00011115	5.4863e-05	6.8331e-05	3.8372e-05	3.4398e-05	0	8.664e-05	4.70337e-05	0.542863	-0.881339	3	3
NADH-quinone oxidoreductase subunit 4	GWH15_08290	Metabolism	Energy production and conversion	K00333	C	47 kDa	0.00058506	0.00078534	0.00071661	0.00048653	0.0002638	0.00038427	1	0.00069567	0.0003782	0.543649	-0.879254	3	3
P-protein	GWH15_14415	Metabolism	Amino acid transport and metabolism	K04518	E	30 kDa	0.00030919	0.00039036	0.00034683	0.00023141	0.00020215	0.00013591	1	0.000348793	0.000189823	0.544229	-0.877715	3	3
ATP-dependent RNA helicase RhlE	GWH15_15825	Information storage and processing	Replication, recombination and repair	K03724	L	172 kDa	3.2613e-05	1.7156e-05		1.356e-05			0	2.48845e-05	1.356e-05	0.544918	-0.87589	2	1
hypothetical protein	GWH15_18875	Metabolism	Inorganic ion transport and metabolism	-	-	109 kDa	0.00042754	0.0005038	0.00035969	0.00031999	0.00020964	0.0001754	1	0.000430343	0.00023501	0.546099	-0.872766	3	3
Homoserine kinase	GWH15_12255	Metabolism	Amino acid transport and metabolism	K00872	E	32 kDa		0.00011698	5.1968e-05	4.6232e-05			0	8.4474e-05	4.6232e-05	0.547293	-0.869616	2	1
hypothetical protein	GWH15_09040	Unclassified	Unclassified	-	-	46 kDa	5.8053e-05	8.1437e-05	3.6177e-05	3.2184e-05			0	5.85557e-05	3.2184e-05	0.549631	-0.863465	3	1
Glutamyl-tRNA(Gln) amidotransferase subunit A	GWH15_01065	Information storage and processing	Translation, ribosomal structure and biogenesis	K02433	J	51 kDa	0.0006108	0.00077115	0.00071777	0.00047892	0.00037081	0.00030684	1	0.000699907	0.000385523	0.550821	-0.860344	3	3
FAD-dependent decaprenylphosphoryl-beta-D-ribofuranose 2-oxidase	GWH15_18730	Metabolism	Energy production and conversion	-	C	12 kDa		0.00077698	0.00046021	0.00034119			0	0.000618595	0.00034119	0.551556	-0.85842	2	1
Methanol dehydrogenase activator	GWH15_14475	Metabolism	Nucleotide transport and metabolism	K01515	V	24 kDa	0.00051361	0.00058193	0.00036931	0.00019713	0.00032288	0.00028944	1	0.000488283	0.000269817	0.552582	-0.855739	3	3
Type-1 restriction enzyme R protein	GWH15_06785	Cellular processing and signaling	Defense mechanisms	K01153	V	90 kDa	0.00016142	0.00015851	9.0534e-05	0.00010739	8.7947e-05	3.1535e-05	0	0.000136821	7.5624e-05	0.552721	-0.855377	3	3
hypothetical protein	GWH15_02015	Unclassified	Unclassified	-	-	71 kDa	5.2354e-05	4.1312e-05	2.4469e-05	2.1769e-05			0	3.93783e-05	2.1769e-05	0.552817	-0.855127	3	1
GDP-mannose-dependent alpha-(1-6)-phosphatidylinositol monomannoside mannosyltransferase	GWH15_16910	Cellular processing and signaling	Cell wall/membrane/envelope biogenesis	K00754	M	44 kDa	0.00010721	0.00018047	8.0171e-05	3.5662e-05	0.00010514	6.2832e-05	0	0.000122617	6.7878e-05	0.553577	-0.853143	3	3
Cysteine desulfurase IscS	GWH15_19145	Metabolism	Amino acid transport and metabolism	K04487	E	47 kDa	0.0010569	0.001215	0.00096969	0.00058596	0.00060784	0.00060224	1	0.00108053	0.00059868	0.554061	-0.851882	3	3
N-acetylmannosamine kinase	GWH15_03185	Poorly characterized	Function unknown	-	K	32 kDa	0.00011455	0.00027116	0.00032122	0.00021433	9.3613e-05	8.3917e-05	0	0.000235643	0.00013062	0.554312	-0.851229	3	3
hypothetical protein	GWH15_18330	Unclassified	Unclassified	-	-	21 kDa	0.00025991			0.00014409			0	0.00025991	0.00014409	0.554384	-0.851042	1	1
hypothetical protein	GWH15_17860	Unclassified	Unclassified	-	-	26 kDa	0.00010757			5.9636e-05			0	0.00010757	5.9636e-05	0.554392	-0.85102	1	1
Phosphoglucosamine mutase	GWH15_18515	Metabolism	Carbohydrate transport and metabolism	K03431	G	47 kDa		0.00010021	7.1224e-05	4.7522e-05			0	8.5717e-05	4.7522e-05	0.554406	-0.850986	2	1
hypothetical protein	GWH15_08770	Information storage and processing	Transcription	-	-	14 kDa	0.00020319			0.00011265			0	0.00020319	0.00011265	0.554407	-0.850982	1	1
Cyanophycinase	GWH15_01945	Unclassified	Unclassified	K13282	Q	31 kDa	0.00023142	0.00024348	0.00021633	7.2169e-05	0.00014185	0.00016954	1	0.00023041	0.000127853	0.554893	-0.849717	3	3
Carboxypeptidase G2	GWH15_17260	Metabolism	Amino acid transport and metabolism	K01295	E	47 kDa		5.9856e-05	5.318e-05	3.1541e-05			0	5.6518e-05	3.1541e-05	0.55807	-0.841482	2	1
hypothetical protein	GWH15_19215	Unclassified	Unclassified	-	-	123 kDa	0.000718	0.00074754	0.00041948	0.00031098	0.00040341	0.00033971	1	0.00062834	0.000351367	0.559198	-0.838568	3	3
Glycine--tRNA ligase beta subunit	GWH15_14360	Information storage and processing	Translation, ribosomal structure and biogenesis	K01879	J	76 kDa	0.00094547	0.0010722	0.00087231	0.00070456	0.00064223	0.00026986	1	0.000963327	0.000538883	0.559398	-0.838052	3	3
Methionine--tRNA ligase	GWH15_11145	Information storage and processing	Translation, ribosomal structure and biogenesis	K01874	J	80 kDa	0.00041198	0.00045821	0.00020905	0.00029365	0.00017315	0.00013797	0	0.000359747	0.00020159	0.560367	-0.835557	3	3
putative formaldehyde dehydrogenase AdhA	GWH15_18480	Metabolism	Energy production and conversion	K13979	G	38 kDa	0.00024382	0.00043609	0.00036467	0.00024331	0.00019926	0.0001429	1	0.000348193	0.000195157	0.560484	-0.835256	3	3
putative CtpA-like serine protease	GWH15_01450	Cellular processing and signaling	Cell wall/membrane/envelope biogenesis	K03797	O	45 kDa	4.0159e-05	0.00012675	0.00016893	6.6792e-05		5.8841e-05	0	0.000111946	6.28165e-05	0.56113	-0.833592	3	2
hypothetical protein	GWH15_12115	Poorly characterized	Function unknown	K09144	V	40 kDa		0.00010232	0.00011363	6.0655e-05			0	0.000107975	6.0655e-05	0.56175	-0.831999	2	1
Thymidylate synthase ThyX	GWH15_18350	Metabolism	Nucleotide transport and metabolism	-	F	59 kDa	9.5885e-05	0.00010088	0.00011951	6.6448e-05	5.2241e-05		1	0.000105425	5.93445e-05	0.562907	-0.829031	3	2
DNA polymerase III subunit beta	GWH15_00015	Information storage and processing	Replication, recombination and repair	K02338	L	44 kDa	0.00057603	0.00098762	0.00081765	0.00058547	0.00034871	0.00040637	0	0.000793767	0.00044685	0.562949	-0.828924	3	3
hypothetical protein	GWH15_06550	Metabolism	Carbohydrate transport and metabolism	K01191	G	131 kDa	0.00011455	0.00016571	6.0229e-05	6.5489e-05	0.00010531	2.0979e-05	0	0.000113496	6.3926e-05	0.563243	-0.828171	3	3
Phosphoenolpyruvate carboxylase	GWH15_01270	Metabolism	Energy production and conversion	K01595	C	104 kDa	0.00076503	0.00094862	0.0005704	0.00056046	0.00038704	0.00034695	1	0.00076135	0.000431483	0.566735	-0.819255	3	3
UDP-N-acetylglucosamine 4-epimerase	GWH15_00365	Cellular processing and signaling	Cell wall/membrane/envelope biogenesis	K01784	M	36 kDa	0.00017993	0.00024339	0.00019222	0.00014963	8.4026e-05		1	0.00020518	0.000116828	0.569393	-0.812504	3	2
4-hydroxythreonine-4-phosphate dehydrogenase 2	GWH15_06375	Metabolism	Coenzyme transport and metabolism	K00097	H	35 kDa	0.00015852	0.00022238	7.409e-05		8.6367e-05		0	0.000151663	8.6367e-05	0.569465	-0.81232	3	1
DNA-binding protein HU	GWH15_13700	Information storage and processing	Replication, recombination and repair	K03530	L	10 kDa	0.0013424	0.00060528	0.0017926	0.0006379	0.00078361		0	0.00124676	0.000710755	0.570082	-0.81076	3	2
Tryptophan synthase alpha chain	GWH15_00830	Metabolism	Amino acid transport and metabolism	K01695	E	27 kDa	0.00022713	0.00030725	0.00030331	0.00013492	0.00010607	0.00023771	0	0.00027923	0.000159567	0.571452	-0.807295	3	3
hypothetical protein	GWH15_06030	Unclassified	Unclassified	-	-	28 kDa	0.00033205	0.00052403	0.00043455	0.00024852		0.00024326	0	0.00043021	0.00024589	0.571558	-0.807028	3	2
hypothetical protein	GWH15_08400	Cellular processing and signaling	Cell wall/membrane/envelope biogenesis	-	-	12 kDa	0.00090624		0.0010589	0.00075363	0.00049375	0.00044261	0	0.00098257	0.00056333	0.573323	-0.80258	2	3
Threonine synthase	GWH15_14225	Metabolism	Amino acid transport and metabolism	K01733	E	43 kDa	6.4003e-05	0.00013468	7.977e-05	5.3225e-05			0	9.28177e-05	5.3225e-05	0.573436	-0.802295	3	1
Arginine--tRNA ligase	GWH15_10565	Information storage and processing	Translation, ribosomal structure and biogenesis	K01887	J	74 kDa	0.00019163	0.00016129	0.00029854	0.00019123	0.00014617	3.7436e-05	0	0.000217153	0.000124945	0.575378	-0.797417	3	3
Maltooligosyl trehalose synthase	GWH15_13915	Metabolism	Carbohydrate transport and metabolism	K06044	G	101 kDa	0.00027061	0.00026437	0.00022585	0.00024111	0.00014217	5.6642e-05	0	0.00025361	0.000146641	0.578213	-0.790326	3	3
Putative mycofactocin radical SAM maturase MftC	GWH15_03080	Poorly characterized	Function unknown	K06937	R	79 kDa	0.0002788	0.00026782	0.00015863	0.00016129	0.0001585	8.8804e-05	0	0.000235083	0.000136198	0.579361	-0.787467	3	3
CTP synthase	GWH15_01110	Metabolism	Nucleotide transport and metabolism	K01937	F	61 kDa	0.00021722	0.00021222	0.00021756	0.00015484	0.00015216	6.8202e-05	1	0.000215667	0.000125067	0.57991	-0.786098	3	3
3-oxoacyl-[acyl-carrier-protein] synthase 3	GWH15_02270	Metabolism	Lipid transport and metabolism	K00648	I	36 kDa	0.0011866	0.0013813	0.001298	0.00086084	0.00086661	0.0005179	1	0.00128863	0.00074845	0.580809	-0.783864	3	3
Putative mycofactocin radical SAM maturase MftC	GWH15_07685	Poorly characterized	Function unknown	K06139	R	42 kDa	6.755e-05	0.00018952	0.00012629	7.4899e-05	7.3606e-05		0	0.000127787	7.42525e-05	0.581066	-0.783226	3	2
Ribulokinase	GWH15_19300	Metabolism	Carbohydrate transport and metabolism	K00853	G	56 kDa	4.8951e-05	0.000103	0.00019828	6.7846e-05			0	0.000116744	6.7846e-05	0.581154	-0.783009	3	1
Glucose--fructose oxidoreductase	GWH15_14070	Poorly characterized	Function unknown	-	R	40 kDa		0.00022078	0.00010898	7.7559e-05	0.00011433		0	0.00016488	9.59445e-05	0.581905	-0.781144	2	2
Glycerol kinase	GWH15_15295	Metabolism	Energy production and conversion	K00864	C	54 kDa	8.5509e-05	0.00017993	0.0001119	0.00011377	5.5905e-05	5.0115e-05	0	0.00012578	7.32633e-05	0.582474	-0.779735	3	3
Pyrroline-5-carboxylate reductase	GWH15_10500	Metabolism	Amino acid transport and metabolism	K00286	E	29 kDa	0.00057092	0.00060067	0.0004775	0.00027487	0.00024557	0.00044027	1	0.000549697	0.000320237	0.58257	-0.779497	3	3
Serine/threonine-protein kinase PknD	GWH15_02205	Unclassified	Unclassified	-	R	36 kDa	0.00012297	0.00020699	6.8966e-05	4.0903e-05	0.00012059	7.2067e-05	0	0.000132975	7.78533e-05	0.585472	-0.772328	3	3
FAD-dependent decaprenylphosphoryl-beta-D-ribofuranose 2-oxidase	GWH15_18735	Metabolism	Energy production and conversion	K16653	C	40 kDa	9.4557e-05	7.4613e-05	0.00013258	5.8975e-05			0	0.000100583	5.8975e-05	0.58633	-0.770216	3	1
Putative glutamate--cysteine ligase 2	GWH15_17030	Poorly characterized	Function unknown	K06048	O	43 kDa	0.00027828	0.00039036	0.00023844	0.00013499	0.00022742	0.00016989	1	0.00030236	0.000177433	0.586828	-0.76899	3	3
Phosphopantetheine adenylyltransferase	GWH15_18315	Metabolism	Coenzyme transport and metabolism	K00954	H	18 kDa	0.0015706	0.0011016	0.0013703	0.0012191	0.00077015	0.00038355	0	0.0013475	0.000790933	0.586964	-0.768657	3	3
hypothetical protein	GWH15_11850	Unclassified	Unclassified	-	-	35 kDa	0.00020878	0.00021965	0.00017076	0.00015192	8.5311e-05	0.00011471	1	0.00019973	0.000117314	0.587361	-0.76768	3	3
Pca regulon regulatory protein	GWH15_13490	Information storage and processing	Transcription	K13641	K	29 kDa	0.00016224	0.00020483		0.00010793			0	0.000183535	0.00010793	0.588062	-0.765959	2	1
L-threonine ammonia-lyase	GWH15_13200	Metabolism	Amino acid transport and metabolism	K01754	E	34 kDa	0.00013292	0.00013985	0.00012425			7.7904e-05	0	0.00013234	7.7904e-05	0.588666	-0.76448	3	1
L-rhamnonate dehydratase	GWH15_13390	Cellular processing and signaling	Cell wall/membrane/envelope biogenesis	K01684	M	44 kDa	0.00015317	0.00029928	0.00018409	7.2786e-05	0.00014306	0.0001603	0	0.00021218	0.000125382	0.590923	-0.758958	3	3
Esterase EstD	GWH15_19420	Poorly characterized	Function unknown	-	T	34 kDa	0.00010503	0.00016575	0.00017181	8.7343e-05			0	0.00014753	8.7343e-05	0.592036	-0.756244	3	1
6-phosphogluconolactonase	GWH15_12015	Metabolism	Carbohydrate transport and metabolism	-	-	44 kDa			5.8655e-05	3.4788e-05			0	5.8655e-05	3.4788e-05	0.593095	-0.753664	1	1
hypothetical protein	GWH15_03715	Unclassified	Unclassified	-	-	134 kDa	2.0432e-05	6.449e-05		2.2655e-05	3.3396e-05	1.9958e-05	0	4.2461e-05	2.53363e-05	0.596697	-0.744931	2	3
GDP-6-deoxy-D-mannose reductase	GWH15_04685	Poorly characterized	Function unknown	K08679	M	39 kDa	0.00065273	0.0007376	0.00056495	0.00018093	0.00063222	0.00035421	0	0.00065176	0.00038912	0.59703	-0.744126	3	3
hypothetical protein	GWH15_11780	Unclassified	Unclassified	-	S	29 kDa	0.00093811	0.00076412	0.0011315	0.00052847	0.00059355	0.00057641	1	0.000944577	0.000566143	0.599362	-0.738501	3	3
2-isopropylmalate synthase	GWH15_02370	Metabolism	Amino acid transport and metabolism	K01649	E	44 kDa	0.0001486	0.00026801	0.00017859	0.00019419	6.9395e-05	9.3311e-05	0	0.0001984	0.000118965	0.599624	-0.737871	3	3
hypothetical protein	GWH15_06930	Poorly characterized	Function unknown	K09767	S	18 kDa	0.00051408	0.00027043	0.00033638	0.00029926		0.00015065	0	0.00037363	0.000224955	0.60208	-0.731974	3	2
Leucine--tRNA ligase	GWH15_11475	Information storage and processing	Translation, ribosomal structure and biogenesis	K01869	J	97 kDa	0.00039463	0.00051898	0.00047955	0.00037739	0.00027413	0.00018792	1	0.000464387	0.000279813	0.602544	-0.730862	3	3
Nitrogen regulatory protein P-II	GWH15_01085	Metabolism	Amino acid transport and metabolism	K04751	T	12 kDa	0.0010667	0.00040082	0.0015669	0.0010138	0.00037362	0.00044656	0	0.00101147	0.000611327	0.604392	-0.726443	3	3
DNA gyrase subunit B	GWH15_18765	Information storage and processing	Replication, recombination and repair	K02470	L	99 kDa	0.00029658	0.00046301	0.00027723	0.00038984	0.0001251	0.00011214	0	0.000345607	0.000209027	0.604811	-0.725444	3	3
Protein translocase subunit SecA	GWH15_07455	Cellular processing and signaling	Intracellular trafficking, secretion, and vesicular transport	K03070	U	111 kDa	0.00022389	0.00032616	0.00022539	0.00022916	0.00012668	0.00011355	0	0.00025848	0.000156463	0.605321	-0.724228	3	3
Putative competence-damage inducible protein	GWH15_02195	Metabolism	Coenzyme transport and metabolism	K03742	H	45 kDa	0.00010208	0.00017184	9.5419e-05	6.7911e-05	6.6738e-05	8.9739e-05	1	0.000123113	7.4796e-05	0.607539	-0.71895	3	3
3-dehydroquinate synthase	GWH15_17440	Metabolism	Amino acid transport and metabolism	K01735	E	44 kDa	0.00030551	0.00027857	0.00019038	0.00015243	0.00019974	0.00011937	0	0.000258153	0.00015718	0.608863	-0.715811	3	3
putative oxidoreductase YdgJ	GWH15_07040	Poorly characterized	Function unknown	K16044	R	39 kDa	0.00045039	0.0004988	0.00070907	0.00031541	0.00034871	0.00034732	1	0.000552753	0.000337147	0.609941	-0.713259	3	3
50S ribosomal protein L31	GWH15_02065	Information storage and processing	Translation, ribosomal structure and biogenesis	K02909	J	9 kDa	0.00096005	0.00056115	0.0012963	0.00079837	0.00034871		0	0.000939167	0.00057354	0.61069	-0.711487	3	2
putative soluble pyridine nucleotide transhydrogenase	GWH15_03190	Metabolism	Energy production and conversion	K00322	C	51 kDa	0.00036704	0.00055994	0.00063473	0.00044259	0.00026997	0.00024201	0	0.00052057	0.00031819	0.611234	-0.710204	3	3
3-oxoacyl-[acyl-carrier-protein] reductase FabG	GWH15_10160	Poorly characterized	Function unknown	K00059	C	32 kDa	0.00023221	0.00021377	0.00027133	0.00016897	0.00014233	0.00012759	1	0.000239103	0.000146297	0.611855	-0.708737	3	3
hypothetical protein	GWH15_17510	Unclassified	Unclassified	-	L	31 kDa	0.00012062	0.00015863	8.4562e-05	5.0153e-05	9.8575e-05		0	0.000121271	7.4364e-05	0.613207	-0.705554	3	2
hypothetical protein	GWH15_01120	Unclassified	Unclassified	-	-	11 kDa	0.0010984	0.00097784	0.00086879	0.0007729	0.00041431	0.00061899	1	0.000981677	0.000602067	0.613304	-0.705325	3	3
Valine--tRNA ligase	GWH15_17470	Information storage and processing	Translation, ribosomal structure and biogenesis	K01873	J	102 kDa	0.00019353	0.00029088	0.00032735	0.00029889	0.00010544	9.452e-05	0	0.000270587	0.000166283	0.614529	-0.702447	3	3
Vitamin B12-dependent ribonucleotide reductase	GWH15_15270	Metabolism	Nucleotide transport and metabolism	K00525	F	115 kDa	0.00012773	0.00020997	9.7008e-05	0.00014605	5.2192e-05	7.0179e-05	0	0.000144903	8.94737e-05	0.617474	-0.695549	3	3
Cobalt-zinc-cadmium resistance protein CzcB	GWH15_01900	Metabolism	Inorganic ion transport and metabolism	K15727	M	40 kDa	4.5033e-05	9.4759e-05	4.2095e-05	3.7449e-05			0	6.0629e-05	3.7449e-05	0.617675	-0.695081	3	1
Ribosome-binding ATPase YchF	GWH15_15070	Information storage and processing	Translation, ribosomal structure and biogenesis	K06942	J	40 kDa	4.676e-05	9.8393e-05	4.371e-05	3.8886e-05			0	6.29543e-05	3.8886e-05	0.617686	-0.695055	3	1
Ribosome-recycling factor	GWH15_03160	Information storage and processing	Translation, ribosomal structure and biogenesis	K02838	J	22 kDa	0.00057185	0.0004628	0.00041119	0.00040239		0.00019336	0	0.000481947	0.000297875	0.618066	-0.694166	3	2
Outer membrane porin F	GWH15_08370	Cellular processing and signaling	Cell wall/membrane/envelope biogenesis	K03286	M	27 kDa	0.00023611	0.00021293	6.306e-05	0.0001122		9.8843e-05	0	0.0001707	0.000105522	0.618169	-0.693926	3	2
NADH-quinone oxidoreductase subunit F	GWH15_08275	Metabolism	Energy production and conversion	K00335	C	47 kDa	0.00073534	0.00087544	0.00072354	0.0006115	0.00037955	0.00045365	1	0.000778107	0.000481567	0.618895	-0.692232	3	3
hypothetical protein	GWH15_14235	Poorly characterized	Function unknown	-	-	118 kDa	0.00045534	0.00052037	0.00024217	0.00016975	0.00030797	0.00027607	0	0.00040596	0.000251263	0.618936	-0.692137	3	3
Farnesyl diphosphate synthase	GWH15_14850	Metabolism	Coenzyme transport and metabolism	K13789	H	33 kDa	0.00024696	0.00025982	0.0002565	0.00013691	0.0001794		1	0.000254427	0.000158155	0.621613	-0.685911	3	2
Methanesulfonate monooxygenase	GWH15_01865	Poorly characterized	Function unknown	K17228	H	40 kDa	0.00016321	0.00026984	0.00013077	9.6949e-05	0.00015244	0.00010249	0	0.00018794	0.000117293	0.624098	-0.680155	3	3
tRNA-specific adenosine deaminase	GWH15_16120	Metabolism	Nucleotide transport and metabolism	K01485	J	17 kDa	0.00028258	0.00035676	0.00026414	0.00018799			0	0.00030116	0.00018799	0.62422	-0.679874	3	1
hypothetical protein	GWH15_14470	Poorly characterized	Function unknown	-	S	58 kDa	0.00030082	0.00026652	0.0002368	0.00021066	0.00012939	0.00016238	1	0.000268047	0.000167477	0.624804	-0.678524	3	3
2Fe-2S ferredoxin	GWH15_00550	Metabolism	Energy production and conversion	K04755	C	16 kDa	0.00087676	0.00073795	0.0010381	0.00048607	0.00057322	0.00059949	1	0.00088427	0.000552927	0.625292	-0.677399	3	3
3-isopropylmalate dehydratase large subunit	GWH15_02350	Metabolism	Amino acid transport and metabolism	K01703	E	51 kDa	0.00055461	0.00060232	0.00060204	0.00032731	0.00038014	0.0003932	1	0.000586323	0.000366883	0.625736	-0.676375	3	3
Ribosomal large subunit pseudouridine synthase B	GWH15_17370	Information storage and processing	Translation, ribosomal structure and biogenesis	K06178	J	34 kDa	0.0004741	0.00055748	0.00072993	0.00053341	0.00036466	0.00020431	0	0.00058717	0.00036746	0.625815	-0.676191	3	3
hypothetical protein	GWH15_08050	Unclassified	Unclassified	-	-	48 kDa	8.0698e-05	0.00010613	7.5433e-05	5.0331e-05		5.9119e-05	1	8.74203e-05	5.4725e-05	0.625999	-0.675769	3	2
Prolyl tripeptidyl peptidase	GWH15_18880	Metabolism	Amino acid transport and metabolism	-	E	72 kDa	0.00094678	0.0010096	0.0011003	0.00082989	0.0006901	0.00039367	1	0.00101889	0.000637887	0.626058	-0.675631	3	3
hypothetical protein	GWH15_12655	Unclassified	Unclassified	-	-	24 kDa	0.00025099	0.00018862	0.0002011	0.00017891	0.00011721	0.00010507	1	0.00021357	0.00013373	0.626165	-0.675386	3	3
3-oxoacyl-[acyl-carrier-protein] reductase FabG	GWH15_18355	Metabolism	Lipid transport and metabolism	K00059	I	26 kDa	0.00057799	0.00053656	0.00057206	0.0004241	0.00033343	0.00029889	1	0.000562203	0.00035214	0.626357	-0.674943	3	3
Outer membrane protein OprM	GWH15_07045	Cellular processing and signaling	Cell wall/membrane/envelope biogenesis	-	M	54 kDa	0.00013308	0.00022752	0.00013995	8.3002e-05	0.00010876	0.00012187	1	0.00016685	0.000104544	0.626575	-0.674441	3	3
Glutamate synthase [NADPH] large chain	GWH15_07135	Metabolism	Amino acid transport and metabolism	K00265	E	162 kDa	0.00016876	0.00015388	0.00012094	0.00013566	0.00010114	4.1212e-05	0	0.00014786	9.26707e-05	0.626746	-0.674047	3	3
putative trans-aconitate 2-methyltransferase	GWH15_07465	Metabolism	Secondary metabolites biosynthesis, transport, and catabolism	K00598	C	28 kDa	6.465e-05	0.00010203	9.0648e-05	5.3763e-05			0	8.5776e-05	5.3763e-05	0.626784	-0.67396	3	1
Guanine deaminase	GWH15_13850	Unclassified	Unclassified	K01487	J	16 kDa	0.00011378	0.00017957	0.00015954	9.4622e-05			0	0.000150963	9.4622e-05	0.626788	-0.673951	3	1
Cysteine desulfurase NifS	GWH15_17580	Metabolism	Amino acid transport and metabolism	K04487	E	42 kDa	4.31e-05	6.8018e-05	6.0432e-05	3.5842e-05			0	5.71833e-05	3.5842e-05	0.626791	-0.673944	3	1
Cytosol aminopeptidase	GWH15_10555	Metabolism	Amino acid transport and metabolism	K01255	E	53 kDa	0.002506	0.0021733	0.0019468	0.0013095	0.0016052	0.0012404	1	0.0022087	0.00138503	0.627081	-0.673277	3	3
Ribonuclease G	GWH15_17095	Information storage and processing	Translation, ribosomal structure and biogenesis	K08301	J	142 kDa	0.00014431	8.2814e-05	0.00011037	0.0001091	3.2164e-05		0	0.000112498	7.0632e-05	0.627851	-0.671506	3	2
Putative formate dehydrogenase	GWH15_02095	Metabolism	Energy production and conversion	K00123	R	113 kDa	0.00049752	0.00051457	0.00044142	0.000561	0.00017918	0.00017298	0	0.000484503	0.000304387	0.628245	-0.670601	3	3
Lactate utilization protein B	GWH15_05455	Metabolism	Energy production and conversion	K00782	C	54 kDa	0.00017451	0.00018361	0.0001305	0.00014513	8.5573e-05	7.6709e-05	0	0.000162873	0.000102471	0.629143	-0.668539	3	3
putative zinc protease	GWH15_07840	Cellular processing and signaling	Post-translational modification, protein turnover, and chaperones	K07263	R	53 kDa	0.0001382	0.00012722	0.00012918	0.00011493		5.0622e-05	1	0.000131533	8.2776e-05	0.629316	-0.668144	3	2
Thiol:disulfide interchange protein DsbD	GWH15_11610	Cellular processing and signaling	Post-translational modification, protein turnover, and chaperones	K06888	R	24 kDa	0.00055828	0.00046151	0.00048459	0.0002653	0.00039107	0.00029214	1	0.00050146	0.00031617	0.630499	-0.665434	3	3
Shikimate dehydrogenase (NADP(+))	GWH15_15540	Metabolism	Amino acid transport and metabolism	K13832	E	59 kDa	0.00021411	0.00019308	0.00021444	0.00015262	0.00014998	8.9632e-05	1	0.00020721	0.000130744	0.630973	-0.664349	3	3
hypothetical protein	GWH15_18505	Poorly characterized	Function unknown	-	P	104 kDa	0.00037219	0.00037293	0.00022366	0.00022108	0.00026072	0.00012984	0	0.000322927	0.00020388	0.631351	-0.663486	3	3
GTP cyclohydrolase 1	GWH15_08575	Metabolism	Coenzyme transport and metabolism	K01495	H	23 kDa	0.0002972	0.00026801	0.00031749	0.00024715		0.00012441	0	0.000294233	0.00018578	0.631404	-0.663365	3	2
D-alanine--D-alanine ligase	GWH15_01860	Poorly characterized	Function unknown	-	H	37 kDa	0.00022723	0.00042501	0.00025961	0.00018896	0.00016507	0.00022196	1	0.00030395	0.000191997	0.631672	-0.662753	3	3
Folylpolyglutamate synthase	GWH15_19650	Metabolism	Coenzyme transport and metabolism	K11754	H	53 kDa	0.00015611	0.00025548	0.00012971	0.00012982	8.5051e-05	0.00012707	0	0.000180433	0.00011398	0.631703	-0.662681	3	3
Biopolymer transport protein ExbD	GWH15_19240	Metabolism	Inorganic ion transport and metabolism	K03559	U	15 kDa	0.00059262	0.00043645	0.00038777	0.00034498	0.00029059	0.00026049	1	0.00047228	0.000298687	0.632436	-0.66101	3	3
Diaminopimelate decarboxylase	GWH15_10475	Metabolism	Amino acid transport and metabolism	K01586	E	46 kDa	0.0001614	0.00012735	0.00018858	0.00010066			0	0.00015911	0.00010066	0.632644	-0.660534	3	1
hypothetical protein	GWH15_04695	Unclassified	Unclassified	-	-	29 kDa	0.0001255	9.9026e-05	0.00014664	7.8272e-05			0	0.000123722	7.8272e-05	0.632644	-0.660534	3	1
Negative regulator of genetic competence ClpC/MecB	GWH15_10390	Cellular processing and signaling	Post-translational modification, protein turnover, and chaperones	K03696	O	93 kDa	7.2761e-05	0.00014217	7.773e-05	0.00010373	5.0968e-05	3.046e-05	0	9.75537e-05	6.17193e-05	0.632671	-0.660474	3	3
Alanine--tRNA ligase	GWH15_17740	Information storage and processing	Translation, ribosomal structure and biogenesis	K01872	J	100 kDa	0.0003222	0.00035836	0.00029258	0.0002756	0.00016551	0.00017535	1	0.00032438	0.000205487	0.633475	-0.65864	3	3
Multidrug export protein AcrE	GWH15_09430	Cellular processing and signaling	Defense mechanisms	K03585	M	44 kDa	0.00024499	0.00023627	0.00017175	0.00022071	0.00013348	5.9826e-05	0	0.00021767	0.000138005	0.634012	-0.657419	3	3
Sulfite reductase [NADPH] flavoprotein alpha-component	GWH15_11500	Metabolism	Inorganic ion transport and metabolism	K00380	P	43 kDa	0.00050327	0.00050647	0.00067498	0.00045491	0.00035765	0.00025648	1	0.000561573	0.000356347	0.634551	-0.656193	3	3
GTPase Der	GWH15_15105	Poorly characterized	Function unknown	K03977	R	69 kDa	0.00023589	0.00023358	0.00016862	0.00023079	0.0001134	6.0993e-05	0	0.000212697	0.000135061	0.634993	-0.655186	3	3
UDP-glucose 4-epimerase	GWH15_08905	Unclassified	Unclassified	-	M	31 kDa	0.00043246	0.00036399	0.00043119	0.0001918	0.00037698	0.00021121	0	0.000409213	0.000259997	0.635357	-0.65436	3	3
Protein RecA	GWH15_18340	Information storage and processing	Replication, recombination and repair	K03553	L	38 kDa	0.00040866	0.00073345	0.00035953	0.00031985	0.00035362	0.00028177	1	0.000500547	0.000318413	0.636131	-0.652604	3	3
Elongation factor Ts	GWH15_13090	Information storage and processing	Translation, ribosomal structure and biogenesis	K02357	J	24 kDa	0.0012801	0.0015508	0.0013779	0.001258	0.00057061	0.00085252	1	0.00140293	0.00089371	0.63703	-0.650568	3	3
hypothetical protein	GWH15_15395	Metabolism	Amino acid transport and metabolism	-	M	105 kDa	7.2628e-05	0.00011462	0.00011032	9.0596e-05	5.9355e-05	3.9905e-05	0	9.91893e-05	6.32853e-05	0.638026	-0.648314	3	3
hypothetical protein	GWH15_05960	Poorly characterized	Function unknown	-	S	17 kDa	0.0012488	0.0010949	0.00097281	0.0007789	0.00042525	0.0009149	1	0.0011055	0.00070635	0.63894	-0.646248	3	3
Signal recognition particle protein	GWH15_07325	Cellular processing and signaling	Intracellular trafficking, secretion, and vesicular transport	K03106	U	50 kDa	0.0001666	0.00019476	0.00022495	0.00020012	0.00012103	5.4246e-05	0	0.000195437	0.000125132	0.640269	-0.64325	3	3
hypothetical protein	GWH15_06280	Poorly characterized	Function unknown	-	R	37 kDa	0.00022392	0.00026176	0.0001628	0.00010345	0.00020333	0.00010936	0	0.00021616	0.000138713	0.641716	-0.639993	3	3
Chaperone SurA	GWH15_00690	Cellular processing and signaling	Post-translational modification, protein turnover, and chaperones	K03771	O	80 kDa	0.00024449	0.00026947	0.00022854	0.00018395	0.00020932	8.5291e-05	1	0.0002475	0.00015952	0.644527	-0.633688	3	3
Transcription-repair-coupling factor	GWH15_03545	Information storage and processing	Replication, recombination and repair	K03723	L	26 kDa	7.2015e-05	0.00011365		5.9887e-05			0	9.28325e-05	5.9887e-05	0.645108	-0.632387	2	1
hypothetical protein	GWH15_13775	Unclassified	Unclassified	-	-	25 kDa	7.6881e-05	0.00012133		6.3934e-05			0	9.91055e-05	6.3934e-05	0.645111	-0.632382	2	1
hypothetical protein	GWH15_12330	Poorly characterized	Function unknown	K08999	R	19 kDa	0.00030297	0.00047814	9.4403e-05	0.00025195	0.00016507	0.00014797	0	0.000291838	0.00018833	0.645325	-0.631903	3	3
5-methyltetrahydropteroyltriglutamate--homocysteine methyltransferase	GWH15_03700	Metabolism	Amino acid transport and metabolism	K00549	E	84 kDa	0.0070345	0.0060607	0.0042994	0.0036468	0.0047723	0.002808	0	0.0057982	0.00374237	0.645436	-0.631654	3	3
3-ketoacyl-CoA thiolase	GWH15_07860	Metabolism	Lipid transport and metabolism	K00632	I	41 kDa	0.00013029	0.00013707	0.00012179	7.2231e-05		9.5448e-05	1	0.000129717	8.38395e-05	0.646328	-0.629662	3	2
hypothetical protein	GWH15_02305	Poorly characterized	Function unknown	-	S	10 kDa			0.00097497	0.00063081			0	0.00097497	0.00063081	0.647005	-0.628152	1	1
Type III pantothenate kinase	GWH15_01320	Information storage and processing	Transcription	K03525	H	29 kDa	0.00041241	0.00026702	0.00029654	0.0002902	0.00015556	0.00018593	0	0.000325323	0.000210563	0.647243	-0.62762	3	3
Quercetin 2,3-dioxygenase	GWH15_03065	Poorly characterized	Function unknown	K06911	R	25 kDa	0.00033248	0.00031094	0.00034533	0.00024577	0.00018115		1	0.000329583	0.00021346	0.647666	-0.626678	3	2
putative ABC transporter ATP-binding protein YbiT	GWH15_17345	Poorly characterized	Function unknown	K06158	R	61 kDa	0.00017224	0.00013179	0.00020491	0.00014324	7.678e-05		0	0.000169647	0.00011001	0.648465	-0.624898	3	2
Amylopullulanase	GWH15_18175	Poorly characterized	Function unknown	-	G	178 kDa	7.9338e-05	7.3037e-05	4.6351e-05	6.5977e-05	4.8629e-05	1.4531e-05	0	6.6242e-05	4.30457e-05	0.649824	-0.621878	3	3
Thioredoxin reductase	GWH15_04740	Cellular processing and signaling	Post-translational modification, protein turnover, and chaperones	K00384	O	35 kDa	0.00028884	0.00035914	0.00041726	0.00019652	0.00034334	0.00015389	0	0.00035508	0.00023125	0.651262	-0.618691	3	3
Cell division protein FtsZ	GWH15_14885	Cellular processing and signaling	Cell cycle control, cell division, chromosome partitioning	K03531	D	55 kDa	0.00022888	0.0003268	0.00035148	0.00020393	0.00026721	0.00011977	0	0.000302387	0.00019697	0.651385	-0.618419	3	3
hypothetical protein	GWH15_12110	Unclassified	Unclassified	-	-	27 kDa	0.0001045	7.3293e-05		5.7932e-05			0	8.88965e-05	5.7932e-05	0.651679	-0.617766	2	1
6,7-dimethyl-8-ribityllumazine synthase	GWH15_02430	Metabolism	Coenzyme transport and metabolism	K00794	H	32 kDa	0.00055339	0.00088865	0.00057173	0.00046019	0.00042845	0.00042675	1	0.000671257	0.000438463	0.653198	-0.614408	3	3
Aminopeptidase YpdF	GWH15_07165	Metabolism	Amino acid transport and metabolism	K01262	E	37 kDa	0.00036784	0.0004902	0.00034384	0.0002855	0.00032065	0.00017965	1	0.000400627	0.000261933	0.653809	-0.613059	3	3
tRNA threonylcarbamoyladenosine biosynthesis protein TsaE	GWH15_14870	Poorly characterized	Function unknown	K06925	J	17 kDa		0.00041622	0.00015848	0.00018799			0	0.00028735	0.00018799	0.65422	-0.612153	2	1
Delta-aminolevulinic acid dehydratase	GWH15_00040	Metabolism	Coenzyme transport and metabolism	K01698	H	36 kDa	0.00090785	0.0010643	0.0014063	0.00064711	0.00080553	0.0007601	1	0.00112615	0.00073758	0.654957	-0.610528	3	3
hypothetical protein	GWH15_06415	Unclassified	Unclassified	-	-	102 kDa	6.5072e-05	6.8463e-05	4.3448e-05	3.8653e-05			0	5.89943e-05	3.8653e-05	0.655199	-0.609996	3	1
Long-chain-fatty-acid--CoA ligase FadD15	GWH15_07145	Metabolism	Lipid transport and metabolism	K01897	I	65 kDa	0.00012908	0.00012072	0.00012066	8.349e-05	0.00011721	4.2029e-05	1	0.000123487	8.09097e-05	0.65521	-0.609971	3	3
50S ribosomal protein L3	GWH15_02495	Information storage and processing	Translation, ribosomal structure and biogenesis	K02906	J	26 kDa	0.0082517	0.0076799	0.0058345	0.0064808	0.0030548	0.0047534	0	0.00725537	0.004763	0.65648	-0.607178	3	3
Pyruvate dehydrogenase E1 component subunit alpha	GWH15_06995	Metabolism	Energy production and conversion	-	-	28 kDa	9.6975e-05	0.00017005		8.0644e-05		9.4725e-05	1	0.000133512	8.76845e-05	0.656751	-0.606581	2	2
Malate synthase A	GWH15_07935	Metabolism	Energy production and conversion	K01638	C	60 kDa	0.0011166	0.0011412	0.00096917	0.0007163	0.00073001	0.00067777	1	0.00107566	0.000708027	0.658227	-0.603342	3	3
hypothetical protein	GWH15_17035	Poorly characterized	Function unknown	-	H	38 kDa	0.00022858	0.00034738	0.00018993	0.00014785	0.00020756	0.00014885	0	0.000255297	0.000168087	0.658397	-0.602969	3	3
hypothetical protein	GWH15_10465	Poorly characterized	Function unknown	-	-	18 kDa	0.00050796	0.00026721	0.00033238	0.00033794		0.00014885	0	0.000369183	0.000243395	0.659279	-0.601038	3	2
Serine 3-dehydrogenase	GWH15_00485	Cellular processing and signaling	Cell wall/membrane/envelope biogenesis	K14189	M	27 kDa	0.00094445	0.0011356	0.00072519	0.0007293	0.00038592	0.00074132	0	0.00093508	0.000618847	0.661811	-0.595508	3	3
hypothetical protein	GWH15_17650	Unclassified	Unclassified	-	-	37 kDa		8.0164e-05	4.7482e-05	4.2242e-05			0	6.3823e-05	4.2242e-05	0.661862	-0.595398	2	1
hypothetical protein	GWH15_05995	Unclassified	Unclassified	-	-	38 kDa	7.2938e-05	0.00015348	9.0907e-05	6.0655e-05	7.9478e-05		0	0.000105775	7.00665e-05	0.662411	-0.594202	3	2
hypothetical protein	GWH15_03990	Unclassified	Unclassified	-	-	31 kDa	0.00015077	0.00019035	0.00011275	0.00010031			0	0.00015129	0.00010031	0.663031	-0.592851	3	1
Translation initiation factor IF-3	GWH15_00805	Information storage and processing	Translation, ribosomal structure and biogenesis	K02520	J	25 kDa	0.00049748	0.00048314	0.00057234	0.00031824	0.00037529	0.00033642	1	0.000517653	0.000343317	0.663217	-0.592446	3	3
N-substituted formamide deformylase	GWH15_11635	Poorly characterized	Function unknown	K07047	R	62 kDa	9.0146e-05	6.3228e-05	0.0001264	7.4965e-05	4.9114e-05		0	9.3258e-05	6.20395e-05	0.665246	-0.58804	3	2
Deoxyribose-phosphate aldolase	GWH15_12315	Metabolism	Nucleotide transport and metabolism	K01619	F	26 kDa	0.00029654	0.00027732	0.0001848	0.0001918		0.00014483	0	0.000252887	0.000168315	0.665575	-0.587327	3	2
Biphenyl dioxygenase system ferredoxin subunit	GWH15_11565	Metabolism	Energy production and conversion	K00363	P	12 kDa	0.00039508	0.00041567	0.00029545	0.00013142	0.0002583	0.00034732	0	0.000368733	0.00024568	0.666281	-0.585797	3	3
hypothetical protein	GWH15_06900	Poorly characterized	Function unknown	-	S	43 kDa	0.00041028	0.00043165	0.00038351	0.0003753	0.00020118	0.00024045	1	0.00040848	0.00027231	0.666642	-0.585015	3	3
UDP-glucose 6-dehydrogenase TuaD	GWH15_06980	Cellular processing and signaling	Cell wall/membrane/envelope biogenesis	K00012	M	52 kDa	0.00045392	0.00053488	0.00047523	0.00049828	0.0002671	0.00021283	0	0.00048801	0.00032607	0.668163	-0.581729	3	3
Imidazolonepropionase	GWH15_03745	Metabolism	Secondary metabolites biosynthesis, transport, and catabolism	-	Q	47 kDa	3.9056e-05	0.00014382	9.1271e-05	6.4958e-05		5.7225e-05	0	9.13823e-05	6.10915e-05	0.668526	-0.580944	3	2
hypothetical protein	GWH15_17695	Unclassified	Unclassified	-	-	25 kDa	0.00029943	0.00043317	0.00034987	0.00021788	0.00012235	0.00038388	0	0.000360823	0.00024137	0.668942	-0.580046	3	3
Histidine--tRNA ligase	GWH15_00915	Information storage and processing	Translation, ribosomal structure and biogenesis	K01892	J	59 kDa	0.00011166	0.00016782	0.00019383	0.00010612			0	0.00015777	0.00010612	0.672625	-0.572126	3	1
ATP-dependent protease subunit HslV	GWH15_01285	Cellular processing and signaling	Post-translational modification, protein turnover, and chaperones	K01419	O	23 kDa	0.00097067	0.00089358	0.00071831	0.00057177	0.00039664	0.00077037	0	0.000860853	0.000579593	0.673278	-0.570726	3	3
Aspartyl/glutamyl-tRNA(Asn/Gln) amidotransferase subunit B	GWH15_16125	Information storage and processing	Translation, ribosomal structure and biogenesis	K02434	J	54 kDa	0.00024382	0.00020156	0.0002442	0.00024621	0.00014233	7.6553e-05	0	0.00022986	0.000155031	0.674458	-0.568199	3	3
Tryptophan--tRNA ligase	GWH15_17400	Information storage and processing	Translation, ribosomal structure and biogenesis	K01867	J	45 kDa	0.00014897	0.00015673	0.00011936	0.00012388	6.9568e-05	9.3543e-05	0	0.000141687	9.56637e-05	0.675178	-0.566661	3	3
Fructose-1,6-bisphosphatase class 1	GWH15_15755	Metabolism	Carbohydrate transport and metabolism	K03841	G	36 kDa	0.0006744	0.00084599	0.00060616	0.00053926	0.00059355	0.00030404	1	0.00070885	0.00047895	0.675672	-0.565605	3	3
30S ribosomal protein S1	GWH15_00730	Information storage and processing	Translation, ribosomal structure and biogenesis	K02945	J	72 kDa	0.00095109	0.0010692	0.00090122	0.00085593	0.00068145	0.00043906	1	0.000973837	0.000658813	0.676513	-0.56381	3	3
Riboflavin synthase	GWH15_02150	Metabolism	Coenzyme transport and metabolism	K00793	H	22 kDa	0.00015803	0.00029097	0.00022158		0.00012915	0.00017366	0	0.000223527	0.000151405	0.677346	-0.562034	3	2
2-keto-3-deoxy-L-rhamnonate aldolase	GWH15_06385	Metabolism	Carbohydrate transport and metabolism	K02510	-	28 kDa	0.00019846	0.0002436	0.00024735	0.00016504	0.00010813	0.00019385	1	0.000229803	0.000155673	0.67742	-0.561878	3	3
Ribonuclease R	GWH15_18555	Information storage and processing	Transcription	K12573	K	102 kDa	0.00032714	0.00034419	0.00019222	0.00023319	0.00022916	0.00012326	0	0.00028785	0.000195203	0.678143	-0.56034	3	3
HTH-type transcriptional regulator MtrR	GWH15_04115	Information storage and processing	Transcription	-	K	24 kDa	0.00016026			9.9953e-05		0.00011741	0	0.00016026	0.000108681	0.678157	-0.560308	1	2
putative A/G-specific adenine glycosylase YfhQ	GWH15_00600	Information storage and processing	Replication, recombination and repair	K03575	L	41 kDa	0.00011595	0.00012199	8.6707e-05	3.8569e-05	0.00011371	6.7955e-05	0	0.000108216	7.34113e-05	0.67838	-0.559835	3	3
Deacetylase	GWH15_15370	Metabolism	Secondary metabolites biosynthesis, transport, and catabolism	-	Q	45 kDa	9.8771e-05	0.00014548	7.3862e-05	6.571e-05	6.4576e-05	8.6831e-05	0	0.000106038	7.23723e-05	0.682515	-0.551067	3	3
ATP-dependent zinc metalloprotease FtsH	GWH15_15725	Cellular processing and signaling	Post-translational modification, protein turnover, and chaperones	K03798	O	70 kDa	0.00013355	0.00012646		8.8847e-05			0	0.000130005	8.8847e-05	0.683412	-0.549172	2	1
hypothetical protein	GWH15_02080	Cellular processing and signaling	Cell wall/membrane/envelope biogenesis	-	M	32 kDa	0.00067372	0.00059068	0.00049857	0.00051357	0.00032118	0.00037017	0	0.000587657	0.00040164	0.68346	-0.549071	3	3
putative succinyl-CoA:3-ketoacid coenzyme A transferase subunit B	GWH15_17805	Metabolism	Lipid transport and metabolism	K01029	I	23 kDa	0.00061783	0.00044689	0.00036095	0.00038534	0.00025246	0.00033947	0	0.000475223	0.000325757	0.685481	-0.544811	3	3
Squalene--hopene cyclase	GWH15_09570	Metabolism	Lipid transport and metabolism	K06045	I	78 kDa	7.4967e-05	2.6291e-05	3.5038e-05	3.1171e-05			0	4.5432e-05	3.1171e-05	0.686102	-0.543504	3	1
hypothetical protein	GWH15_00895	Metabolism	Coenzyme transport and metabolism	K00384	H	62 kDa	6.1951e-05	4.8884e-05	5.791e-05	3.8639e-05			0	5.62483e-05	3.8639e-05	0.686936	-0.541753	3	1
Toluene efflux pump outer membrane protein TtgF	GWH15_01225	Cellular processing and signaling	Cell wall/membrane/envelope biogenesis	-	-	55 kDa	5.0003e-05	0.00015782	3.116e-05	2.7721e-05	8.1729e-05		0	7.9661e-05	5.4725e-05	0.686974	-0.541674	3	2
Quinone oxidoreductase 2	GWH15_03930	Unclassified	Unclassified	-	R	30 kDa	0.00021034	0.00025291	5.6176e-05	0.00014993		8.8054e-05	0	0.000173142	0.000118992	0.687251	-0.541091	3	2
hypothetical protein	GWH15_05330	Poorly characterized	Function unknown	K09121	S	48 kDa	0.00024436	0.00039552	0.0002987	0.00023447	0.00024579	0.00016525	0	0.00031286	0.00021517	0.687752	-0.54004	3	3
Biopolymer transport protein ExbD	GWH15_19245	Metabolism	Inorganic ion transport and metabolism	K03560	U	15 kDa	0.00083547	0.00056507	0.0006694	0.00069478	0.00029262	0.00043719	0	0.00068998	0.000474863	0.688228	-0.539042	3	3
50S ribosomal protein L23	GWH15_02505	Information storage and processing	Translation, ribosomal structure and biogenesis	K02892	J	11 kDa	0.0088857	0.0025917	0.0057566	0.0065845	0.0024446	0.0028359	0	0.00574467	0.003955	0.688465	-0.538545	3	3
HTH-type transcriptional regulator IscR	GWH15_06105	Information storage and processing	Transcription	-	-	13 kDa	0.00089467	0.00028963	0.00090063	0.00057231	0.00056243	0.00030251	0	0.000694977	0.000479083	0.689352	-0.536688	3	3
Pantothenate synthetase	GWH15_03645	Metabolism	Coenzyme transport and metabolism	K01918	H	32 kDa	8.62e-05	0.00024184	0.00018801	0.00014337	9.3928e-05		0	0.000172017	0.000118649	0.689753	-0.535848	3	2
Alkanal monooxygenase alpha chain	GWH15_03240	Metabolism	Energy production and conversion	-	H	37 kDa	0.00014885	0.0002349	0.00032465	8.2519e-05	0.00024328		0	0.000236133	0.000162899	0.689862	-0.53562	3	2
hypothetical protein	GWH15_02880	Poorly characterized	Function unknown	-	O	8 kDa	0.00048078		0.00089882	0.00059972		0.00035222	0	0.0006898	0.00047597	0.690012	-0.535307	2	2
hypothetical protein	GWH15_10765	Metabolism	Amino acid transport and metabolism	-	M	96 kDa	0.00014747	0.00021722	0.00015623	0.0002044	0.00011249	4.3215e-05	0	0.00017364	0.000120035	0.691287	-0.532644	3	3
Orotidine 5'-phosphate decarboxylase	GWH15_05360	Metabolism	Nucleotide transport and metabolism	K01591	F	32 kDa		0.00023784	0.00034338	0.00021149	0.00018475	0.00020701	1	0.00029061	0.000201083	0.691935	-0.531291	2	3
Peptide chain release factor 1	GWH15_03245	Information storage and processing	Translation, ribosomal structure and biogenesis	K02835	J	40 kDa	9.5084e-05		0.00013332	7.9071e-05			0	0.000114202	7.9071e-05	0.692378	-0.530367	2	1
Exodeoxyribonuclease 7 small subunit	GWH15_13640	Information storage and processing	Replication, recombination and repair	K03602	L	9 kDa	0.00021071		0.00029545	0.00017523			0	0.00025308	0.00017523	0.69239	-0.530344	2	1
Phospho-2-dehydro-3-deoxyheptonate aldolase	GWH15_00840	Metabolism	Amino acid transport and metabolism	K03856	E	37 kDa	0.0021397	0.0021453	0.0023531	0.0014445	0.001687	0.0014754	1	0.0022127	0.00153563	0.694009	-0.526974	3	3
DNA-binding protein HU 1	GWH15_08640	Information storage and processing	Replication, recombination and repair	K05788	L	11 kDa	0.0024382	0.0012826	0.0022792	0.0018828	0.0011386	0.0011483	0	0.002	0.0013899	0.69495	-0.525019	3	3
Nicotinate phosphoribosyltransferase	GWH15_15910	Metabolism	Coenzyme transport and metabolism	K00763	H	50 kDa	0.00011584	0.00018282	0.00014438	0.00012845	9.4672e-05	8.4866e-05	0	0.00014768	0.000102663	0.69517	-0.524563	3	3
Acetolactate synthase large subunit	GWH15_02335	Metabolism	Amino acid transport and metabolism	K01652	E	63 kDa	0.00015965	9.1616e-05	0.00013566	0.00010862	7.1165e-05		0	0.000128975	8.98925e-05	0.696974	-0.520823	3	2
hypothetical protein	GWH15_17170	Unclassified	Unclassified	-	-	25 kDa	0.00014588	0.00011511		9.0983e-05			0	0.000130495	9.0983e-05	0.697214	-0.520326	2	1
DNA polymerase I	GWH15_01345	Information storage and processing	Replication, recombination and repair	K02335	L	114 kDa	3.3013e-05	0.00011288	3.0859e-05	4.118e-05			0	5.89173e-05	4.118e-05	0.698945	-0.516748	3	1
Bifunctional protein FolD protein	GWH15_01215	Metabolism	Coenzyme transport and metabolism	K01491	H	32 kDa	0.00016788	0.00014719	0.00013077	0.00011634	9.1464e-05		0	0.000148613	0.000103902	0.699143	-0.51634	3	2
Outer membrane protein assembly factor BamD	GWH15_17465	Cellular processing and signaling	Cell wall/membrane/envelope biogenesis	K05807	M	65 kDa	0.00023822	0.00013269	0.00022268	0.0001981	0.00011452	0.00010266	0	0.000197863	0.000138427	0.699607	-0.515382	3	3
Formate dehydrogenase	GWH15_14090	Metabolism	Energy production and conversion	K00122	C	42 kDa	0.0002653	0.00037216	0.00026866	0.00016547	0.00014454	0.00032393	0	0.00030204	0.000211313	0.69962	-0.515356	3	3
N-substituted formamide deformylase	GWH15_11290	Poorly characterized	Function unknown	K12960	Q	49 kDa	7.5856e-05	0.00011971	0.00014181	7.8852e-05			0	0.000112459	7.8852e-05	0.701164	-0.512176	3	1
Isoleucine--tRNA ligase	GWH15_12705	Information storage and processing	Translation, ribosomal structure and biogenesis	K01870	J	107 kDa	0.00052667	0.00065741	0.00053403	0.00054932	0.00042312	0.00023542	0	0.000572703	0.00040262	0.703017	-0.508369	3	3
hypothetical protein	GWH15_05965	Metabolism	Inorganic ion transport and metabolism	-	-	118 kDa	0.0004418	0.00074208	0.00028981	0.00030295	0.00041807	0.00031799	0	0.00049123	0.000346337	0.70504	-0.504224	3	3
Thiosulfate sulfurtransferase GlpE	GWH15_07435	Metabolism	Inorganic ion transport and metabolism	K11996	P	12 kDa	0.0013433	0.00058193	0.0020681	0.0015113	0.00038745	0.0009262	0	0.00133111	0.00094165	0.707417	-0.499367	3	3
Carboxy-terminal processing protease CtpA	GWH15_15690	Cellular processing and signaling	Cell wall/membrane/envelope biogenesis	K03797	O	60 kDa	9.4296e-05	0.00013228	0.00013222	0.00015683	5.1375e-05	4.6054e-05	0	0.000119599	8.4753e-05	0.708645	-0.496865	3	3
hypothetical protein	GWH15_11315	Poorly characterized	Function unknown	K07046	R	32 kDa	0.00024209	0.00031838	0.00039602	0.00017616	0.00014839	0.00035471	0	0.00031883	0.00022642	0.710159	-0.493786	3	3
1-acyl-sn-glycerol-3-phosphate acyltransferase	GWH15_01525	Metabolism	Lipid transport and metabolism	K00655	I	26 kDa	7.1712e-05	0.00011317	6.7034e-05	5.9636e-05			0	8.3972e-05	5.9636e-05	0.710189	-0.493725	3	1
hypothetical protein	GWH15_05980	Metabolism	Inorganic ion transport and metabolism	-	-	116 kDa	3.9254e-05	0.00011564	4.4032e-05	3.2643e-05	5.1328e-05	5.7514e-05	0	6.63087e-05	4.71617e-05	0.711244	-0.491583	3	3
50S ribosomal protein L24	GWH15_02550	Information storage and processing	Translation, ribosomal structure and biogenesis	K02895	J	13 kDa	0.0061472	0.009511	0.0045969	0.0057134	0.0010639	0.0076293	0	0.0067517	0.0048022	0.711258	-0.491555	3	3
Response regulator rcp1	GWH15_05435	Cellular processing and signaling	Signal transduction mechanisms	K02485	T	16 kDa	0.00036058	0.00037937	0.00044941	0.00029986		0.00026416	1	0.000396453	0.00028201	0.711332	-0.491405	3	2
Cyclic pyranopterin monophosphate synthase	GWH15_17640	Metabolism	Coenzyme transport and metabolism	K03639	H	40 kDa		9.9209e-05	6.6108e-05	5.8812e-05			0	8.26585e-05	5.8812e-05	0.711506	-0.491053	2	1
Crotonyl-CoA reductase	GWH15_03980	Metabolism	Energy production and conversion	K00001	C	36 kDa	0.0010889	0.0012522	0.0013256	0.0007581	0.0010347	0.00081626	1	0.00122223	0.000869687	0.711555	-0.490952	3	3
Putative gamma-glutamyltransferase YwrD	GWH15_03970	Metabolism	Amino acid transport and metabolism	K00681	E	58 kDa	7.858e-05	8.2674e-05	7.3453e-05	6.5347e-05		4.6054e-05	0	7.82357e-05	5.57005e-05	0.711958	-0.490136	3	2
hypothetical protein	GWH15_16970	Cellular processing and signaling	Signal transduction mechanisms	-	R	25 kDa	0.00041353	0.00059329	0.00045684	0.00034389	0.00036868	0.00033049	1	0.000487887	0.000347687	0.712638	-0.488758	3	3
hypothetical protein	GWH15_02770	Unclassified	Unclassified	-	-	12 kDa	0.00081274	0.00034203	0.00083569	0.00047311			0	0.000663487	0.00047311	0.713066	-0.487892	3	1
Biodegradative arginine decarboxylase	GWH15_18510	Metabolism	Amino acid transport and metabolism	K01584	T	90 kDa	0.0011647	0.00098027	0.00053444	0.00078363	0.00072684	0.00040334	0	0.000893137	0.000637937	0.714265	-0.485468	3	3
hypothetical protein	GWH15_05565	Unclassified	Unclassified	-	-	86 kDa	0.00012504	0.00015348	0.00011688	0.00010398	0.00010219	7.6335e-05	1	0.0001318	9.41683e-05	0.714479	-0.485036	3	3
Aconitate hydratase	GWH15_00760	Metabolism	Energy production and conversion	K01681	C	102 kDa	0.0012935	0.0015027	0.00099083	0.0010159	0.00093968	0.00075022	0	0.00126234	0.000901933	0.714491	-0.485012	3	3
Dihydrolipoyl dehydrogenase 3	GWH15_00050	Metabolism	Energy production and conversion	K00382	C	53 kDa	0.00065911	0.0010037	0.00077825	0.0008366	0.00042525	0.00048286	0	0.000813687	0.00058157	0.714735	-0.48452	3	3
hypothetical protein	GWH15_17520	Poorly characterized	Function unknown	K07145	H	11 kDa	0.0082671	0.0054244	0.0075616	0.0064313	0.0053759	0.0033864	0	0.00708437	0.00506453	0.714889	-0.48421	3	3
putative HTH-type transcriptional regulator	GWH15_00855	Information storage and processing	Transcription	-	-	18 kDa	0.00015706	0.00011016	9.7878e-05	8.7076e-05			0	0.000121699	8.7076e-05	0.715501	-0.482974	3	1
Glucose--fructose oxidoreductase	GWH15_10770	Poorly characterized	Function unknown	K00118	R	39 kDa	0.00068554	0.00079587	0.00086179	0.00043248	0.00069548	0.00055418	0	0.000781067	0.000560713	0.717882	-0.478182	3	3
Lipopolysaccharide assembly protein B	GWH15_01360	Unclassified	Unclassified	-	-	14 kDa	0.00044249	0.00019952	0.00023636	0.00021027			0	0.00029279	0.00021027	0.71816	-0.477623	3	1
Glucosamine kinase GspK	GWH15_00450	Information storage and processing	Transcription	-	G	31 kDa	0.00014271	0.00015014	8.0037e-05	9.4939e-05		8.3636e-05	0	0.000124296	8.92875e-05	0.718348	-0.477246	3	2
hypothetical protein	GWH15_04950	Unclassified	Unclassified	-	-	20 kDa	0.00019846	0.000261		0.00016504			0	0.00022973	0.00016504	0.718409	-0.477124	2	1
Glutamate-pyruvate aminotransferase AlaC	GWH15_01090	Metabolism	Amino acid transport and metabolism	K14261	E	44 kDa	0.00019543	0.00020561	0.00024357	0.00016252	0.00014197	0.00015908	1	0.00021487	0.000154523	0.719148	-0.475639	3	3
Outer membrane protein assembly factor BamD	GWH15_12295	Poorly characterized	Function unknown	-	R	34 kDa	0.0010088	0.0009466	0.00066263	0.00090692	0.00057932	0.00039948	0	0.000872677	0.000628573	0.720282	-0.473366	3	3
putative periplasmic serine endoprotease DegP-like protein	GWH15_01200	Cellular processing and signaling	Post-translational modification, protein turnover, and chaperones	-	O	42 kDa	6.4325e-05	0.00011279	8.0171e-05	5.3492e-05	7.0092e-05		0	8.5762e-05	6.1792e-05	0.720506	-0.472918	3	2
hypothetical protein	GWH15_13560	Metabolism	Inorganic ion transport and metabolism	K02039	P	25 kDa	0.00015446	0.00020313	0.00014438	0.00012845		0.00011316	1	0.000167323	0.000120805	0.721985	-0.469958	3	2
Quinohemoprotein ethanol dehydrogenase type-1	GWH15_09370	Metabolism	Carbohydrate transport and metabolism	K00114	G	57 kDa	3.2264e-05	3.3945e-05	4.5238e-05	2.683e-05			0	3.7149e-05	2.683e-05	0.722227	-0.469476	3	1
hypothetical protein	GWH15_15410	Metabolism	Inorganic ion transport and metabolism	-	P	124 kDa	0.00022924	0.00024119	9.6775e-05	0.00012299	0.00015713	0.00013002	0	0.000189068	0.000136713	0.72309	-0.467754	3	3
Glucose-1-phosphate adenylyltransferase	GWH15_13300	Metabolism	Carbohydrate transport and metabolism	K00975	G	47 kDa	0.0010412	0.0015895	0.00099236	0.00076399	0.00090097	0.00095722	1	0.00120769	0.00087406	0.723747	-0.466442	3	3
Putative oxidoreductase YceM	GWH15_05445	Cellular processing and signaling	Post-translational modification, protein turnover, and chaperones	-	R	39 kDa	0.00011787	9.9209e-05	6.6108e-05	5.8812e-05	7.7063e-05	6.9081e-05	0	9.43957e-05	6.83187e-05	0.723748	-0.466441	3	3
2-iminobutanoate/2-iminopropanoate deaminase	GWH15_07710	Information storage and processing	Translation, ribosomal structure and biogenesis	-	V	16 kDa	0.00073959	0.00029928	0.00090407	0.00047311	0.00046494		0	0.000647647	0.000469025	0.724199	-0.465542	3	2
hypothetical protein	GWH15_12660	Unclassified	Unclassified	-	-	38 kDa	4.8487e-05	0.00017855	9.0648e-05	4.0322e-05	0.00011888	7.1043e-05	0	0.000105895	7.67483e-05	0.724759	-0.464427	3	3
hypothetical protein	GWH15_09830	Poorly characterized	Function unknown	-	R	130 kDa	2.9838e-05	0.00010203		4.9627e-05	6.0963e-05	3.2789e-05	0	6.5934e-05	4.7793e-05	0.724861	-0.464223	2	3
hypothetical protein	GWH15_18225	Unclassified	Unclassified	-	-	43 kDa	0.00019395	0.00020405	8.0576e-05	0.00014337	0.00014089	6.315e-05	0	0.000159525	0.000115803	0.725924	-0.462109	3	3
L-fucose mutarotase	GWH15_01905	Poorly characterized	Function unknown	K03534	M	13 kDa	0.0020212	0.0005513	0.0019593	0.0015563	0.00085648	0.00087745	0	0.0015106	0.00109674	0.726032	-0.461896	3	3
Trehalase	GWH15_13920	Metabolism	Carbohydrate transport and metabolism	K01087	G	71 kDa	0.00054355	0.00048609	0.00038107	0.00050852	0.00037758	0.00013937	0	0.000470237	0.000341823	0.726918	-0.460136	3	3
3-deoxy-manno-octulosonate cytidylyltransferase	GWH15_18275	Cellular processing and signaling	Cell wall/membrane/envelope biogenesis	K00979	M	27 kDa		0.00010994		5.7932e-05		0.00010207	0	0.00010994	8.0001e-05	0.727679	-0.458626	1	2
Thymidylate kinase	GWH15_13285	Poorly characterized	Function unknown	K00947	C	31 kDa		0.0001005		5.296e-05		9.3311e-05	0	0.0001005	7.31355e-05	0.727716	-0.458552	1	2
hypothetical protein	GWH15_08775	Unclassified	Unclassified	-	-	40 kDa	9.6427e-05	7.6088e-05	0.00011267	6.0141e-05	7.8804e-05		0	9.50617e-05	6.94725e-05	0.730815	-0.452422	3	2
Chaperone protein ClpB	GWH15_00890	Cellular processing and signaling	Post-translational modification, protein turnover, and chaperones	K03695	O	95 kDa	0.00063979	0.00069383	0.00051524	0.00063027	0.00041829	0.00030286	0	0.000616287	0.000450473	0.730948	-0.45216	3	3
Cysteine--tRNA ligase	GWH15_02115	Information storage and processing	Translation, ribosomal structure and biogenesis	K01883	J	56 kDa		0.00012646	0.00022471	0.00012851			0	0.000175585	0.00012851	0.731896	-0.450289	2	1
Phosphoserine aminotransferase	GWH15_03900	Metabolism	Amino acid transport and metabolism	K00831	H	43 kDa	0.00085778	0.001157	0.00063734	0.00047555	0.00082683	0.00064452	0	0.00088404	0.000648967	0.734092	-0.445967	3	3
Inositol 2-dehydrogenase	GWH15_13370	Poorly characterized	Function unknown	-	R	50 kDa	0.00025213	0.00028568	0.00027194	0.00017742	0.0001902	0.00022734	1	0.000269917	0.00019832	0.734745	-0.444684	3	3
Mycothiol S-conjugate amidase	GWH15_12785	Poorly characterized	Function unknown	-	G	96 kDa	3.776e-05	6.9523e-05	5.2945e-05	3.9251e-05			0	5.34093e-05	3.9251e-05	0.734909	-0.444362	3	1
Anthranilate synthase component 1	GWH15_18435	Metabolism	Amino acid transport and metabolism	K01657	E	56 kDa	0.00033932	0.00048194	0.00031718	0.00036683	0.00022184	0.00024858	0	0.00037948	0.000279083	0.735436	-0.443328	3	3
ECF RNA polymerase sigma factor SigE	GWH15_05395	Information storage and processing	Transcription	K03088	K	27 kDa	0.00049989	0.0006762	0.00056741	0.00050478	0.00046689	0.0003139	0	0.000581167	0.000428523	0.73735	-0.439578	3	3
Malto-oligosyltrehalose trehalohydrolase	GWH15_13910	Metabolism	Carbohydrate transport and metabolism	K01236	G	65 kDa	0.00013219	0.00012363	0.00012357	9.7716e-05	9.603e-05	8.6084e-05	1	0.000126463	9.32767e-05	0.737579	-0.439131	3	3
hypothetical protein	GWH15_19230	Poorly characterized	Function unknown	K09915	S	25 kDa	0.00019307	0.00028438	0.00014438	0.00019267		0.00011316	0	0.000207277	0.000152915	0.737734	-0.438828	3	2
3-phosphoshikimate 1-carboxyvinyltransferase 1	GWH15_12325	Metabolism	Amino acid transport and metabolism	K00800	E	45 kDa	0.00087526	0.0013604	0.0010971	0.00061207	0.00097541	0.00087438	0	0.00111092	0.00082062	0.738685	-0.436969	3	3
hypothetical protein	GWH15_04495	Unclassified	Unclassified	-	-	24 kDa	0.00011744	0.00020593	7.3184e-05	9.766e-05			0	0.000132185	9.766e-05	0.738815	-0.436715	3	1
hypothetical protein	GWH15_04470	Poorly characterized	Function unknown	K09958	S	18 kDa	0.00016733	0.00029341	0.00010428	0.00013915			0	0.00018834	0.00013915	0.738823	-0.436699	3	1
Co-chaperone protein HscB	GWH15_19180	Cellular processing and signaling	Post-translational modification, protein turnover, and chaperones	K04082	O	24 kDa	0.00012019	0.00021076	7.4902e-05	9.9953e-05			0	0.000135284	9.9953e-05	0.738838	-0.436669	3	1
NAD-dependent malic enzyme	GWH15_17985	Metabolism	Energy production and conversion	K00027	C	63 kDa	0.00022379	0.00021975	0.00023708	0.00019851	0.00019508	0.0001093	1	0.000226873	0.00016763	0.73887	-0.436607	3	3
hypothetical protein	GWH15_19470	Unclassified	Unclassified	-	-	29 kDa	0.00022713	0.00020483	0.00027298	0.00018888	0.00015911		0	0.00023498	0.000173995	0.740467	-0.433492	3	2
hypothetical protein	GWH15_13530	Information storage and processing	Transcription	-	R	21 kDa	0.00022223	0.00014029	0.00012464	0.00011089		0.00013025	0	0.000162387	0.00012057	0.742487	-0.429562	3	2
3-oxoacyl-[acyl-carrier-protein] reductase FabG	GWH15_06650	Unclassified	Unclassified	K00540	I	35 kDa	0.00039266	0.00049574	0.0003181	0.000283	0.00038508	0.00023013	0	0.000402167	0.000299403	0.744476	-0.425703	3	3
hypothetical protein	GWH15_16870	Poorly characterized	Function unknown	-	-	80 kDa	6.0695e-05	3.8315e-05	2.2694e-05	3.0284e-05			0	4.0568e-05	3.0284e-05	0.7465	-0.421786	3	1
hypothetical protein	GWH15_01165	Unclassified	Unclassified	-	-	10 kDa	0.0016119	0.00059856	0.0011522	0.0010251	0.00092989	0.00055572	0	0.00112089	0.000836903	0.746644	-0.421508	3	3
Hydrogen cyanide synthase subunit HcnC	GWH15_17515	Metabolism	Energy production and conversion	K03153	E	37 kDa	0.00039924	0.0004988	0.00044317	0.00022826	0.00040785	0.0003656	0	0.00044707	0.000333903	0.74687	-0.42107	3	3
4-alpha-glucanotransferase	GWH15_06910	Metabolism	Carbohydrate transport and metabolism	K00705	G	58 kDa	0.00030119	0.00044012	0.00035975	0.00036179	0.00019145	0.00026969	0	0.00036702	0.00027431	0.747398	-0.420051	3	3
hypothetical protein	GWH15_19315	Unclassified	Unclassified	-	-	22 kDa	0.00012611	0.00017691	0.00011789	0.00010488			0	0.000140303	0.00010488	0.747523	-0.41981	3	1
PhoH-like protein	GWH15_17205	Cellular processing and signaling	Signal transduction mechanisms	K06217	T	38 kDa	0.00012261	0.0002322	9.169e-05	0.00010196	0.00016033	7.186e-05	0	0.000148833	0.000111383	0.748376	-0.418164	3	3
Thiazole synthase	GWH15_08320	Metabolism	Coenzyme transport and metabolism	K03149	H	27 kDa	0.0018122	0.0015253	0.0014476	0.001096	0.0011848	0.0013035	1	0.00159503	0.00119477	0.749054	-0.416858	3	3
Rod shape-determining protein MreB	GWH15_17135	Cellular processing and signaling	Cell cycle control, cell division, chromosome partitioning	K03569	D	42 kDa	0.00026668	0.0003741	0.00022851	0.00012937	0.00032691	0.00019537	0	0.000289763	0.000217217	0.749635	-0.41574	3	3
Pyridoxal 5'-phosphate synthase subunit PdxT	GWH15_09505	Metabolism	Coenzyme transport and metabolism	K08681	H	21 kDa	0.00026258	0.00018417	0.00020454	0.00021836	0.00014306	0.00012824	0	0.000217097	0.00016322	0.751831	-0.41152	3	3
ATP-dependent Clp protease proteolytic subunit	GWH15_10415	Cellular processing and signaling	Post-translational modification, protein turnover, and chaperones	K01358	O	22 kDa	0.0015239	0.0013742	0.0015873	0.0018466	0.00056932	0.00095691	0	0.00149513	0.00112428	0.751957	-0.411277	3	3
ECF RNA polymerase sigma factor SigE	GWH15_14460	Information storage and processing	Transcription	K03088	K	25 kDa	0.00019307	0.00028438	0.00018048	0.00016056		0.00016973	1	0.00021931	0.000165145	0.753021	-0.409238	3	2
L-threonine ammonia-lyase	GWH15_02995	Metabolism	Amino acid transport and metabolism	K01754	E	43 kDa	0.0004371	0.00061316	0.00033076	0.00034618	0.00023814	0.00045745	0	0.00046034	0.000347257	0.754348	-0.406697	3	3
Carbamoyl-phosphate synthase large chain	GWH15_11540	Metabolism	Nucleotide transport and metabolism	K01955	E	119 kDa	0.0025874	0.0018531	0.0016464	0.0016526	0.0018088	0.0011305	0	0.00202897	0.00153063	0.754391	-0.406616	3	3
Aminomethyltransferase	GWH15_13325	Metabolism	Amino acid transport and metabolism	K00605	E	42 kDa	0.00022166	0.00020988	0.0002072	0.00023963	0.00014492	9.7431e-05	0	0.000212913	0.00016066	0.754581	-0.406253	3	3
Chromosome partition protein Smc	GWH15_06080	Cellular processing and signaling	Cell cycle control, cell division, chromosome partitioning	K03529	D	143 kDa	0.00016436	0.00019368	4.302e-05	0.00012575	0.00012895	4.8165e-05	0	0.000133687	0.000100955	0.755161	-0.405143	3	3
Bacterial leucyl aminopeptidase	GWH15_03035	Poorly characterized	Function unknown	-	O	55 kDa	0.00011829		0.00014217	9.8369e-05			0	0.00013023	9.8369e-05	0.755348	-0.404786	2	1
Diaminopimelate epimerase	GWH15_01510	Metabolism	Amino acid transport and metabolism	K01778	E	28 kDa	0.00025569	0.00020176	0.00020914	0.00015948	0.00015672	0.00018732	1	0.000222197	0.00016784	0.755367	-0.404751	3	3
GDP-mannose 4,6-dehydratase	GWH15_12215	Cellular processing and signaling	Cell wall/membrane/envelope biogenesis	K01711	M	42 kDa	0.0018482	0.0028087	0.0022182	0.0018216	0.0015664	0.0018053	1	0.0022917	0.0017311	0.755378	-0.404729	3	3
6-phosphogluconate dehydrogenase, NADP(+)-dependent, decarboxylating	GWH15_01535	Metabolism	Carbohydrate transport and metabolism	K00033	G	53 kDa	0.00048964	0.00053355	0.0009154	0.0006544	0.00040016	0.00040996	0	0.000646197	0.000488173	0.755456	-0.40458	3	3
NAD kinase	GWH15_08495	Metabolism	Carbohydrate transport and metabolism	K00858	F	31 kDa	8.9515e-05	9.4179e-05	0.00011157	7.444e-05			0	9.84213e-05	7.444e-05	0.75634	-0.402893	3	1
putative deoxyribonuclease YcfH	GWH15_06935	Information storage and processing	Replication, recombination and repair	K03424	N	29 kDa	0.00031145	0.00032768	0.00023291	0.0002331	0.00015272	0.0002738	0	0.00029068	0.000219873	0.75641	-0.402759	3	3
3-hydroxyacyl-[acyl-carrier-protein] dehydratase FabZ	GWH15_01635	Metabolism	Lipid transport and metabolism	K02372	I	19 kDa		0.00036329	0.00036888	0.00041021		0.00014455	0	0.000366085	0.00027738	0.757693	-0.400315	2	2
30S ribosomal protein S3	GWH15_02525	Information storage and processing	Translation, ribosomal structure and biogenesis	K02982	J	26 kDa	0.0057894	0.0046276	0.0035141	0.0052522	0.0024579	0.0028643	0	0.0046437	0.0035248	0.75905	-0.397733	3	3
hypothetical protein	GWH15_07225	Unclassified	Unclassified	-	-	65 kDa	0.00020706	0.00014004	0.00012443	0.00017219	0.00012087	6.501e-05	0	0.000157177	0.000119357	0.759379	-0.397108	3	3
Glucoamylase	GWH15_18650	Metabolism	Carbohydrate transport and metabolism	K01178	G	95 kDa	0.00028877	0.00027239	0.00018616	0.00024014	0.00021159	0.00011672	0	0.000249107	0.000189483	0.760651	-0.394693	3	3
Methionine synthase	GWH15_04585	Metabolism	Amino acid transport and metabolism	K00548	E	99 kDa	3.7886e-05	5.979e-05	2.6561e-05	3.1506e-05			0	4.14123e-05	3.1506e-05	0.760788	-0.394434	3	1
Glutamine synthetase	GWH15_12605	Metabolism	Amino acid transport and metabolism	K01915	E	54 kDa	0.00086055	0.00092425	0.0008882	0.00084981	0.00052746	0.0006567	1	0.000891	0.00067799	0.760932	-0.394161	3	3
Elongation factor P	GWH15_18460	Information storage and processing	Translation, ribosomal structure and biogenesis	K02356	J	21 kDa	0.0016145	0.0016501	0.0013798	0.0015728	0.00067857	0.0012842	0	0.00154813	0.00117852	0.761254	-0.393549	3	3
L-threonine dehydratase catabolic TdcB	GWH15_03395	Metabolism	Amino acid transport and metabolism	K01754	E	35 kDa	0.00056892	0.00054414	0.00084605	0.00036559	0.00063402	0.00049257	0	0.000653037	0.000497393	0.761662	-0.392777	3	3
Phosphoenolpyruvate carboxykinase [GTP]	GWH15_15955	Metabolism	Energy production and conversion	K01596	C	68 kDa	0.00063474	0.00050457	0.00050104	0.00048093	0.00043805	0.00033067	1	0.000546783	0.00041655	0.761819	-0.39248	3	3
ATP-dependent RNA helicase RhlE	GWH15_17360	Information storage and processing	Replication, recombination and repair	K11927	L	56 kDa	0.00014713	0.0001892	0.0001681	0.00014955	0.00010688		0	0.000168143	0.000128215	0.762534	-0.391127	3	2
Serine hydroxymethyltransferase	GWH15_00185	Metabolism	Amino acid transport and metabolism	K00600	E	46 kDa	0.0021689	0.002154	0.0018948	0.0011294	0.0022198	0.0013959	0	0.00207257	0.0015817	0.76316	-0.389943	3	3
hypothetical protein	GWH15_06795	Unclassified	Unclassified	-	-	14 kDa	0.00032082	0.00027003	0.00023991	0.00021343	0.00020975		1	0.00027692	0.00021159	0.764083	-0.388198	3	2
Prolyl tripeptidyl peptidase	GWH15_15400	Metabolism	Amino acid transport and metabolism	K01303	E	41 kDa	0.00016277	0.00024464	0.00015215	0.00017403	0.00015203	0.00010221	0	0.00018652	0.000142757	0.765369	-0.385772	3	3
30S ribosomal protein S6	GWH15_04450	Information storage and processing	Translation, ribosomal structure and biogenesis	K02990	J	18 kDa	0.00097676	0.00075721	0.00076887	0.00072677	0.00058818	0.00060259	1	0.00083428	0.00063918	0.766146	-0.384309	3	3
hypothetical protein	GWH15_13905	Unclassified	Unclassified	-	-	40 kDa	0.00023236	0.00020001	0.0002172	0.00022836	0.00010358		0	0.000216523	0.00016597	0.766522	-0.3836	3	2
Fumarate hydratase class I, anaerobic	GWH15_03290	Metabolism	Energy production and conversion	K01676	C	55 kDa	0.00087653	0.0013398	0.0012213	0.00072892	0.0011353	0.00077542	0	0.00114588	0.00087988	0.767866	-0.381073	3	3
hypothetical protein	GWH15_08040	Metabolism	Amino acid transport and metabolism	-	E	43 kDa	0.00013265	0.00025586	0.00020666	0.00014708	0.00018068	0.00012957	0	0.00019839	0.000152443	0.768402	-0.380066	3	3
Phosphate-binding protein PstS	GWH15_13580	Metabolism	Inorganic ion transport and metabolism	K02040	P	36 kDa	0.00032725	0.00029133	0.00032944	0.00029308	0.00028802	0.00014754	0	0.000316007	0.00024288	0.768591	-0.379711	3	3
Hydroxymethylglutaryl-CoA lyase YngG	GWH15_02870	Metabolism	Lipid transport and metabolism	K01640	E	38 kDa	0.00014383	0.00017654	0.00022407	0.00013954			0	0.00018148	0.00013954	0.7689	-0.379132	3	1
Adenosylcobalamin/alpha-ribazole phosphatase	GWH15_11800	Metabolism	Carbohydrate transport and metabolism	K15634	G	22 kDa	0.00048638	0.00041868	0.00037199	0.00044124	0.00021681	0.00032393	0	0.000425683	0.000327327	0.768944	-0.379049	3	3
Amidophosphoribosyltransferase	GWH15_00880	Metabolism	Nucleotide transport and metabolism	K00764	F	55 kDa	0.00016899	0.00021335	0.00020535	0.00016863	0.00011048	0.00017332	0	0.000195897	0.00015081	0.769845	-0.377361	3	3
Putative metal-dependent hydrolase YfiT	GWH15_02055	Poorly characterized	Function unknown	-	S	20 kDa	0.00057856	0.00076088	0.00031548	0.00048113	0.00015761	0.00063578	0	0.00055164	0.00042484	0.77014	-0.376807	3	3
6-phosphogluconolactonase	GWH15_13065	Poorly characterized	Function unknown	-	G	46 kDa	0.00037594	0.0004153	0.0002987	0.00028137	0.00033796	0.00022033	0	0.000363313	0.000279887	0.770373	-0.376372	3	3
ATP-dependent protease ATPase subunit HslU	GWH15_01295	Cellular processing and signaling	Post-translational modification, protein turnover, and chaperones	K03667	O	60 kDa	0.00065155	0.00038455	0.00034166	0.00048897	0.00038962	0.00018627	0	0.000459253	0.000354953	0.772892	-0.371661	3	3
Dihydrolipoyllysine-residue acetyltransferase component of pyruvate dehydrogenase complex	GWH15_00065	Metabolism	Energy production and conversion	K00658	C	55 kDa	0.0009392	0.00076666	0.00062061	0.00078104	0.00071462	0.00030844	0	0.00077549	0.000601367	0.775467	-0.366863	3	3
30S ribosomal protein S15	GWH15_11865	Information storage and processing	Translation, ribosomal structure and biogenesis	K02956	J	10 kDa	0.0063034	0.0029588	0.0087022	0.0062902	0.0025361	0.0051151	0	0.00598813	0.00464713	0.776057	-0.365765	3	3
Chaperone protein HtpG	GWH15_13450	Cellular processing and signaling	Post-translational modification, protein turnover, and chaperones	K04079	O	71 kDa	0.00059091	0.00067952	0.00065512	0.0006171	0.00056153	0.00032215	0	0.00064185	0.00050026	0.779403	-0.359558	3	3
Aminopeptidase N	GWH15_18590	Metabolism	Amino acid transport and metabolism	K08776	E	94 kDa	8.91e-05	0.00016665	9.2541e-05	9.0561e-05			0	0.000116097	9.0561e-05	0.780046	-0.358369	3	1
UDP-N-acetylmuramoyl-tripeptide--D-alanyl-D-alanine ligase	GWH15_14960	Cellular processing and signaling	Cell wall/membrane/envelope biogenesis	K01929	M	48 kDa	0.00013071	0.00017682	0.00013964	9.3173e-05	9.1565e-05	0.00016416	0	0.000149057	0.000116299	0.780236	-0.358018	3	3
General stress protein 69	GWH15_05340	Metabolism	Energy production and conversion	K07079	R	37 kDa	0.00027938	0.00045426	0.00049857	0.00025345	0.00037362	0.00033492	0	0.000410737	0.000320663	0.780703	-0.357154	3	3
Global nitrogen regulator	GWH15_15810	Information storage and processing	Transcription	-	T	27 kDa	0.00049166	0.00040643	0.00029545	0.00023363	0.000287	0.00041164	0	0.000397847	0.000310757	0.781097	-0.356427	3	3
GTP cyclohydrolase-2	GWH15_16940	Metabolism	Coenzyme transport and metabolism	K01497	H	23 kDa	0.00048304	0.00046586	0.00033865	0.00043517		0.00023592	0	0.000429183	0.000335545	0.781822	-0.355088	3	2
50S ribosomal protein L4	GWH15_02500	Information storage and processing	Translation, ribosomal structure and biogenesis	K02926	J	25 kDa	0.0069314	0.0065084	0.0045633	0.0070657	0.0023755	0.0046411	0	0.00600103	0.0046941	0.782215	-0.354362	3	3
Putative N-acetyl-LL-diaminopimelate aminotransferase	GWH15_03725	Metabolism	Amino acid transport and metabolism	K00812	E	42 kDa	0.00020053	0.00032819	0.00020828	0.0001297	0.00021851	0.00022853	0	0.000245667	0.000192247	0.782551	-0.353744	3	3
Lipopolysaccharide assembly protein B	GWH15_01070	Poorly characterized	Function unknown	-	R	68 kDa	0.00045837	0.00048225	0.00056709	0.0005045	0.00041867	0.00025679	0	0.00050257	0.00039332	0.782617	-0.353621	3	3
Mesaconyl-CoA hydratase	GWH15_18400	Metabolism	Lipid transport and metabolism	-	I	17 kDa	0.0014694	0.001427	0.0013207	0.00079896	0.0010161	0.0014905	0	0.0014057	0.00110185	0.783847	-0.351357	3	3
hypothetical protein	GWH15_08285	Unclassified	Unclassified	-	-	12 kDa	0.00041028		0.00046021	0.00034119			0	0.000435245	0.00034119	0.783903	-0.351252	2	1
Multidrug resistance protein MdtA	GWH15_16035	Cellular processing and signaling	Defense mechanisms	K02005	M	46 kDa	5.9538e-05	0.00014616	7.4205e-05	4.9512e-05	9.7314e-05		0	9.3301e-05	7.3413e-05	0.78684	-0.345857	3	2
hypothetical protein	GWH15_06110	Poorly characterized	Function unknown	K05989	-	92 kDa	0.00010159	0.00017102	9.4965e-05	0.00012673	0.00013284	2.9771e-05	0	0.000122525	9.6447e-05	0.787162	-0.345268	3	3
Tetrathionate reductase subunit B	GWH15_00290	Metabolism	Energy production and conversion	K00184	C	114 kDa	0.00035182	0.00033572	0.00021415	0.0003266	0.00024072	0.00014386	0	0.000300563	0.00023706	0.788719	-0.342417	3	3
hypothetical protein	GWH15_01220	Unclassified	Unclassified	-	O	26 kDa	0.0013323	0.0010986	0.001178	0.00089831	0.0010005	0.00094964	1	0.00120297	0.000949483	0.789285	-0.341382	3	3
GTPase Obg	GWH15_19430	Poorly characterized	Function unknown	K03979	D	39 kDa	9.3521e-05	0.00012299	0.00015298	9.7214e-05			0	0.000123164	9.7214e-05	0.789307	-0.341341	3	1
D-alanine--D-alanine ligase A	GWH15_02140	Cellular processing and signaling	Cell wall/membrane/envelope biogenesis	K01921	M	50 kDa	0.00014939	0.00015717	0.00010473	9.3173e-05	0.00012209	0.00010944	0	0.000137097	0.000108234	0.789475	-0.341035	3	3
Uridylate kinase	GWH15_13075	Metabolism	Nucleotide transport and metabolism	K09903	F	26 kDa	0.0023705	0.0019185	0.0013977	0.0020016	0.00083452	0.0016565	0	0.00189557	0.00149754	0.790022	-0.340035	3	3
hypothetical protein	GWH15_19020	Poorly characterized	Function unknown	-	-	138 kDa		2.0672e-05		1.6339e-05			0	2.0672e-05	1.6339e-05	0.790393	-0.339358	1	1
hypothetical protein	GWH15_02090	Unclassified	Unclassified	-	S	16 kDa		0.00011892		9.3995e-05			0	0.00011892	9.3995e-05	0.790405	-0.339335	1	1
Decarboxylase NovR	GWH15_12010	Metabolism	Carbohydrate transport and metabolism	-	G	28 kDa		7.1827e-05		5.6773e-05			0	7.1827e-05	5.6773e-05	0.790413	-0.339321	1	1
hypothetical protein	GWH15_07205	Unclassified	Unclassified	-	-	55 kDa		5.2301e-05		4.134e-05			0	5.2301e-05	4.134e-05	0.790425	-0.3393	1	1
Chaperone protein DnaJ	GWH15_01605	Cellular processing and signaling	Post-translational modification, protein turnover, and chaperones	K03686	O	45 kDa		4.2053e-05		3.324e-05			0	4.2053e-05	3.324e-05	0.790431	-0.339288	1	1
hypothetical protein	GWH15_15480	Poorly characterized	Function unknown	-	R	14 kDa		0.00014365		0.00011355			0	0.00014365	0.00011355	0.790463	-0.33923	1	1
Copper resistance protein C	GWH15_07930	Metabolism	Inorganic ion transport and metabolism	-	-	13 kDa	0.00050624		0.00040561	0.00036085			0	0.000455925	0.00036085	0.791468	-0.337397	2	1
Isoaspartyl dipeptidase	GWH15_15365	Metabolism	Secondary metabolites biosynthesis, transport, and catabolism	K07047	Q	45 kDa	7.8652e-05	0.00020688	0.00011028	0.00013081	9.6417e-05	8.6431e-05	0	0.000131937	0.000104553	0.792442	-0.335623	3	3
8-amino-7-oxononanoate synthase/2-amino-3-ketobutyrate coenzyme A ligase	GWH15_00685	Metabolism	Amino acid transport and metabolism	K00639	H	44 kDa	0.00031685	0.0004667	0.00037516	0.00026349	0.00034526	0.0003095	0	0.000386237	0.000306083	0.792476	-0.335561	3	3
hypothetical protein	GWH15_07980	Unclassified	Unclassified	-	-	101 kDa	0.00017936	0.00019864	0.00017648	0.00020411	0.00013887	9.682e-05	0	0.000184827	0.0001466	0.793176	-0.334288	3	3
2-iminobutanoate/2-iminopropanoate deaminase	GWH15_07625	Information storage and processing	Translation, ribosomal structure and biogenesis	-	V	18 kDa	0.00043888	0.00056436	0.00041025	0.00052718	0.00023911	0.00035725	0	0.000471163	0.000374513	0.794869	-0.33121	3	3
Ribonucleoside-diphosphate reductase subunit beta	GWH15_03675	Metabolism	Nucleotide transport and metabolism	K00526	F	40 kDa	0.00031517	0.00043362	0.00031727	0.00032258	0.00027738	0.00024865	0	0.000355353	0.00028287	0.796025	-0.329115	3	3
L-2,4-diaminobutyrate decarboxylase	GWH15_08325	Metabolism	Amino acid transport and metabolism	K01593	E	51 kDa	7.232e-05	7.6088e-05			5.9103e-05		0	7.4204e-05	5.9103e-05	0.796493	-0.328266	2	1
Alginate biosynthesis protein AlgA	GWH15_18295	Cellular processing and signaling	Cell wall/membrane/envelope biogenesis	K00971	M	41 kDa	0.00024834	0.00042754	0.00035876	0.00037548	0.0001845	0.00026463	0	0.00034488	0.00027487	0.797002	-0.327345	3	3
putative aminotransferase	GWH15_00970	Metabolism	Amino acid transport and metabolism	K15372	E	49 kDa	0.00015239	0.00022045	0.00024928	0.00011089	0.00021794	0.00016746	0	0.000207373	0.00016543	0.79774	-0.32601	3	3
putative sugar kinase YdjH	GWH15_01495	Metabolism	Carbohydrate transport and metabolism	K00852	G	35 kDa	0.00054183	0.00065557	0.00068375	0.00040552	0.00061993	0.00047633	0	0.00062705	0.000500593	0.798331	-0.324941	3	3
Lon protease 2	GWH15_14410	Cellular processing and signaling	Post-translational modification, protein turnover, and chaperones	K01338	O	90 kDa	0.00088894	0.0011113	0.00075274	0.00091317	0.00075212	0.00053631	0	0.00091766	0.000733867	0.799715	-0.322442	3	3
hypothetical protein	GWH15_01990	Unclassified	Unclassified	-	E	70 kDa	6.5443e-05	9.6394e-05	6.1174e-05	7.6191e-05	4.2786e-05		0	7.4337e-05	5.94885e-05	0.800254	-0.32147	3	2
Metalloprotease TldD	GWH15_01735	Information storage and processing	Replication, recombination and repair	K03568	R	55 kDa	0.00024522	0.0003956	0.0003362	0.00029909	0.00026721	0.00021558	0	0.000325673	0.000260627	0.80027	-0.321441	3	3
UDP-N-acetyl-D-glucosamine 6-dehydrogenase	GWH15_00370	Cellular processing and signaling	Cell wall/membrane/envelope biogenesis	K13015	M	49 kDa	9.44e-05	9.9318e-05	8.8242e-05	4.7102e-05	0.00012344	5.5326e-05	0	9.39867e-05	7.52893e-05	0.801064	-0.320011	3	3
hypothetical protein	GWH15_09980	Unclassified	Unclassified	-	-	17 kDa	0.0021469	0.0018634	0.002358	0.0020531	0.0014036	0.0016514	0	0.00212277	0.0017027	0.802114	-0.318122	3	3
Rhamnulokinase	GWH15_08185	Metabolism	Carbohydrate transport and metabolism	K00848	G	53 kDa	7.0093e-05	0.00011062	0.00013104	8.7433e-05	8.5924e-05	7.7024e-05	0	0.000103918	8.34603e-05	0.803139	-0.316278	3	3
Phenylalanine--tRNA ligase beta subunit	GWH15_02960	Information storage and processing	Translation, ribosomal structure and biogenesis	K01890	J	74 kDa	0.00019846	0.0001827	0.00017392	0.00015472	0.00018246	0.00010904	0	0.000185027	0.00014874	0.803884	-0.314941	3	3
Glucose 1-dehydrogenase 1	GWH15_19065	Metabolism	Lipid transport and metabolism	K00059	I	26 kDa	0.0010282	0.001262	0.0010572	0.0011685	0.00067221	0.00085366	0	0.0011158	0.000898123	0.804914	-0.313093	3	3
Porphobilinogen deaminase	GWH15_09605	Metabolism	Coenzyme transport and metabolism	K01749	H	35 kDa	0.00031803	0.00027883	0.00052024	0.00024243	0.00034654	0.00031065	0	0.000372367	0.000299873	0.805317	-0.312371	3	3
hypothetical protein	GWH15_11620	Cellular processing and signaling	Cell wall/membrane/envelope biogenesis	-	M	77 kDa	3.5361e-05	6.2005e-05		3.9208e-05			0	4.8683e-05	3.9208e-05	0.805374	-0.31227	2	1
50S ribosomal protein L21	GWH15_00945	Information storage and processing	Translation, ribosomal structure and biogenesis	K02888	J	12 kDa	0.0019939	0.0014265	0.0022366	0.0014591	0.0016947	0.0014023	0	0.00188567	0.0015187	0.805392	-0.312238	3	3
Enoyl-[acyl-carrier-protein] reductase [NADH] FabI	GWH15_15485	Metabolism	Lipid transport and metabolism	K00208	I	27 kDa	0.00087699	0.00067427	0.00097742	0.0009537	0.00044105	0.00064248	0	0.000842893	0.000679077	0.80565	-0.311776	3	3
dTDP-glucose 4,6-dehydratase	GWH15_01025	Cellular processing and signaling	Cell wall/membrane/envelope biogenesis	K01710	M	42 kDa	0.00026878	0.00035348	0.00014656	9.3132e-05	0.00032949	0.00019691	0	0.000256273	0.000206511	0.805822	-0.311467	3	3
Septum formation protein Maf	GWH15_19305	Cellular processing and signaling	Cell cycle control, cell division, chromosome partitioning	K06287	Q	21 kDa	0.00029868	0.00026935	0.00019943	0.00035483	0.00013948	0.00012504	0	0.00025582	0.00020645	0.807013	-0.309337	3	3
3-oxoacyl-[acyl-carrier-protein] reductase FabG	GWH15_13475	Poorly characterized	Function unknown	K00059	I	27 kDa	0.00013654	0.00014365	6.3816e-05	8.516e-05		0.00010003	0	0.000114669	9.2595e-05	0.8075	-0.308465	3	2
Acetylornithine deacetylase	GWH15_09475	Metabolism	Amino acid transport and metabolism	K01438	E	37 kDa	0.0010667	0.0012267	0.001229	0.00053638	0.001257	0.0010541	0	0.00117413	0.00094916	0.808392	-0.306873	3	3
hypothetical protein	GWH15_15150	Unclassified	Unclassified	-	-	10 kDa	0.00055655	0.00048796	0.00069366	0.00069424	0.00030322	0.00040773	0	0.00057939	0.000468397	0.808431	-0.306804	3	3
Xylulose-5-phosphate phosphoketolase	GWH15_08175	Metabolism	Carbohydrate transport and metabolism	K01621	G	90 kDa	0.00085125	0.00070529	0.00047743	0.0006725	0.00066089	0.00031181	0	0.00067799	0.0005484	0.808861	-0.306035	3	3
Lactate utilization protein A	GWH15_05460	Metabolism	Energy production and conversion	K00104	C	27 kDa	0.00038315	0.00036646	0.00026048	0.00028966	0.0001708	0.00035725	0	0.000336697	0.00027257	0.809542	-0.304823	3	3
30S ribosomal protein S2	GWH15_13095	Information storage and processing	Translation, ribosomal structure and biogenesis	K02967	J	35 kDa	0.0016797	0.0023087	0.0019499	0.0015996	0.0018598	0.0013496	0	0.00197943	0.001603	0.809828	-0.304313	3	3
Elongation factor G	GWH15_02475	Information storage and processing	Translation, ribosomal structure and biogenesis	K02355	J	75 kDa	0.00088841	0.00104	0.00093572	0.001051	0.00092034	0.00034834	0	0.00095471	0.000773227	0.809907	-0.304171	3	3
hypothetical protein	GWH15_05500	Unclassified	Unclassified	-	-	24 kDa	0.00015516	0.00016324		0.00012903			0	0.0001592	0.00012903	0.81049	-0.303134	2	1
Purine nucleoside phosphorylase 1	GWH15_15865	Metabolism	Nucleotide transport and metabolism	K03783	F	28 kDa	0.00072161	0.00059416	0.00061588	0.00067836	0.00015384	0.00073551	0	0.000643883	0.00052257	0.811591	-0.301175	3	3
Beta-galactosidase BgaA	GWH15_06300	Metabolism	Carbohydrate transport and metabolism	K12308	G	76 kDa	0.00016267	7.8989e-05	0.00010527	0.00010406	0.00012271	5.5001e-05	0	0.000115643	9.39237e-05	0.812186	-0.300117	3	3
putative 3-hydroxyacyl-CoA dehydrogenase	GWH15_07855	Metabolism	Lipid transport and metabolism	K07516	I	88 kDa	0.00014713	0.00013269	0.00014736	0.0001311	0.0001546	6.1594e-05	0	0.000142393	0.000115765	0.812992	-0.298687	3	3
General stress protein 69	GWH15_19170	Metabolism	Energy production and conversion	K05882	R	38 kDa	0.00099682	0.0010488	0.00070453	0.00064699	0.00091399	0.00067684	0	0.000916717	0.00074594	0.813708	-0.297416	3	3
dTDP-3-amino-3,4,6-trideoxy-alpha-D-glucose transaminase	GWH15_15590	Metabolism	Amino acid transport and metabolism	K13017	M	42 kDa	0.00013231	0.0001856	0.00012368	5.5013e-05	0.00014417	0.00016155	0	0.000147197	0.000120244	0.816896	-0.291776	3	3
hypothetical protein	GWH15_00315	Unclassified	Unclassified	-	-	24 kDa	0.00046129	0.00060665	0.00039526	0.00054344	0.00031415	0.00033794	0	0.000487733	0.00039851	0.817065	-0.291477	3	3
Acetyl-coenzyme A carboxylase carboxyl transferase subunit beta	GWH15_19460	Metabolism	Lipid transport and metabolism	K01963	I	31 kDa	0.00017966	0.00031503	5.5979e-05	0.0001245		0.00017549	0	0.000183556	0.000149995	0.817161	-0.291308	3	2
hypothetical protein	GWH15_14315	Metabolism	Secondary metabolites biosynthesis, transport, and catabolism	K14259	R	30 kDa	0.0006229	0.00045875	0.00052404	0.0003626	0.00035634	0.00059324	0	0.00053523	0.000437393	0.817206	-0.291228	3	3
Peroxiredoxin OsmC	GWH15_00595	Cellular processing and signaling	Post-translational modification, protein turnover, and chaperones	K04063	V	15 kDa	0.0017552	0.0016556	0.001867	0.0016106	0.001286	0.0014189	1	0.00175927	0.0014385	0.81767	-0.290409	3	3
10 kDa chaperonin 1	GWH15_08090	Cellular processing and signaling	Post-translational modification, protein turnover, and chaperones	K04078	O	11 kDa	0.01655	0.0092505	0.024817	0.014265	0.014653	0.012504	0	0.0168725	0.0138073	0.818334	-0.289239	3	3
N-acetylglucosamine repressor	GWH15_14290	Unclassified	Unclassified	K00845	K	46 kDa	0.00023926	0.00027271	0.00016774	0.00021555	0.00019554	0.00014607	0	0.00022657	0.00018572	0.819703	-0.286828	3	3
Serine/threonine-protein kinase PknD	GWH15_07965	Poorly characterized	Function unknown	-	-	38 kDa	5.0051e-05	0.00013165	4.6786e-05	6.2434e-05			0	7.61623e-05	6.2434e-05	0.819749	-0.286746	3	1
Succinate-semialdehyde dehydrogenase [NADP(+)] 1	GWH15_13895	Metabolism	Energy production and conversion	K00135	C	52 kDa	0.00030224	0.00031798	0.00031576	0.00023656	0.00034871	0.00018234	0	0.000311993	0.00025587	0.820114	-0.286104	3	3
50S ribosomal protein L1	GWH15_02815	Information storage and processing	Translation, ribosomal structure and biogenesis	K02863	J	25 kDa	0.0085698	0.011517	0.0071019	0.0087136	0.0060031	0.0075971	0	0.0090629	0.00743793	0.820701	-0.285071	3	3
hypothetical protein	GWH15_06770	Cellular processing and signaling	Defense mechanisms	K07448	R	36 kDa	0.00031509	0.00035914	0.00019636	0.00017469	0.00038626	0.00015389	0	0.000290197	0.00023828	0.821098	-0.284373	3	3
2-C-methyl-D-erythritol 4-phosphate cytidylyltransferase 2	GWH15_15740	Metabolism	Lipid transport and metabolism	K00991	I	26 kDa	0.00051825	0.00079969	0.00067821	0.00068955	0.0003953	0.00055684	0	0.000665383	0.00054723	0.822428	-0.282038	3	3
Imidazolonepropionase	GWH15_15500	Metabolism	Secondary metabolites biosynthesis, transport, and catabolism	-	Q	46 kDa	0.00019663	0.00020688	0.00016542	0.00016352	0.0001607	0.00014405	1	0.000189643	0.00015609	0.823071	-0.280911	3	3
Uroporphyrinogen decarboxylase	GWH15_04490	Metabolism	Coenzyme transport and metabolism	K01599	H	41 kDa	9.2008e-05	0.0001936	0.00012901	0.00011477	0.00011279		0	0.000138206	0.00011378	0.823264	-0.280573	3	2
hypothetical protein	GWH15_02385	Unclassified	Unclassified	-	M	22 kDa	0.0002573	0.00022559	0.00020043	0.00024963		0.00012566	0	0.000227773	0.000187645	0.823823	-0.279593	3	2
Vitamin B12 transporter BtuB	GWH15_11845	Metabolism	Inorganic ion transport and metabolism	K16092	H	89 kDa	0.00030994	0.00034783	0.00023178	0.00026634	0.00027019	0.00019679	0	0.000296517	0.00024444	0.824372	-0.278633	3	3
Transcriptional activator protein CopR	GWH15_19550	Cellular processing and signaling	Signal transduction mechanisms	K07665	T	26 kDa	0.00021881	0.00030695	0.00013636	0.00018197			0	0.000220707	0.00018197	0.824488	-0.27843	3	1
6-phosphogluconolactonase	GWH15_18610	Metabolism	Carbohydrate transport and metabolism	K01057	G	28 kDa	0.0012607	0.0011563	0.001118	0.00077956	0.00095102	0.0011841	0	0.00117833	0.00097156	0.824521	-0.278373	3	3
Phosphomethylpyrimidine synthase	GWH15_11220	Metabolism	Coenzyme transport and metabolism	K03147	H	55 kDa	0.00055168	0.00092505	0.00070907	0.00074551	0.00045086	0.00060624	0	0.0007286	0.00060087	0.824691	-0.278074	3	3
Ribonuclease J1	GWH15_03405	Poorly characterized	Function unknown	K12574	J	61 kDa	0.00073939	0.00059964	0.00087834	0.00067892	0.00065461	0.00049653	0	0.000739123	0.00061002	0.825329	-0.276959	3	3
Alpha-amylase 1	GWH15_00250	Metabolism	Carbohydrate transport and metabolism	-	G	104 kDa	4.5392e-05	9.5515e-05	5.0917e-05	5.2847e-05			0	6.39413e-05	5.2847e-05	0.826492	-0.274927	3	1
Carboxymethylenebutenolidase	GWH15_11825	Metabolism	Secondary metabolites biosynthesis, transport, and catabolism	K01061	Q	28 kDa	0.0023028	0.0030641	0.0019626	0.001746	0.0018819	0.0024313	0	0.00244317	0.00201973	0.826687	-0.274587	3	3
hypothetical protein	GWH15_09480	Poorly characterized	Function unknown	K07018	R	25 kDa	0.00014906	0.00019603	0.0001045	0.00012396			0	0.000149863	0.00012396	0.827154	-0.273773	3	1
putative TonB-dependent receptor BfrD	GWH15_15010	Metabolism	Inorganic ion transport and metabolism	K16090	P	94 kDa	3.8746e-05	6.1147e-05		4.8331e-05	4.7497e-05	2.8385e-05	0	4.99465e-05	4.14043e-05	0.828974	-0.270602	2	3
hypothetical protein	GWH15_03085	Poorly characterized	Function unknown	-	R	30 kDa	0.00079526	0.00067579	0.00045747	0.00089026	0.00034996	0.00035853	0	0.00064284	0.000532917	0.829004	-0.27055	3	3
Glutamate-pyruvate aminotransferase AlaA	GWH15_09450	Metabolism	Amino acid transport and metabolism	K00812	E	43 kDa	6.5983e-05	9.2561e-05	8.2238e-05	3.6581e-05		9.6678e-05	0	8.02607e-05	6.66295e-05	0.830164	-0.268532	3	2
Peptidyl-prolyl cis-trans isomerase D	GWH15_06905	Cellular processing and signaling	Post-translational modification, protein turnover, and chaperones	K03770	O	71 kDa	0.00048059	0.00020499	0.00013356	0.00033485	0.0002123	0.00013322	0	0.000273047	0.00022679	0.830591	-0.267791	3	3
hypothetical protein	GWH15_06250	Information storage and processing	Translation, ribosomal structure and biogenesis	-	V	16 kDa	0.0010173	0.0016649	0.00089808	0.00089296	0.00092373	0.0011593	0	0.00119343	0.000991997	0.831217	-0.266703	3	3
hypothetical protein	GWH15_15185	Poorly characterized	Function unknown	-	-	11 kDa	0.00017966			0.0001494			0	0.00017966	0.0001494	0.831571	-0.266089	1	1
D-glucosaminate-6-phosphate ammonia lyase	GWH15_07580	Cellular processing and signaling	Cell wall/membrane/envelope biogenesis	K01042	J	50 kDa	3.6943e-05			3.0721e-05			0	3.6943e-05	3.0721e-05	0.831578	-0.266076	1	1
hypothetical protein	GWH15_06745	Unclassified	Unclassified	-	V	23 kDa	8.5767e-05			7.1323e-05			0	8.5767e-05	7.1323e-05	0.83159	-0.266055	1	1
D-glucosaminate-6-phosphate ammonia lyase	GWH15_07620	Metabolism	Amino acid transport and metabolism	K01042	J	46 kDa	3.96e-05			3.2931e-05			0	3.96e-05	3.2931e-05	0.831591	-0.266054	1	1
hypothetical protein	GWH15_13030	Cellular processing and signaling	Cell wall/membrane/envelope biogenesis	-	M	72 kDa	6.3876e-05			5.3119e-05			0	6.3876e-05	5.3119e-05	0.831596	-0.266046	1	1
Peptide deformylase	GWH15_15665	Information storage and processing	Translation, ribosomal structure and biogenesis	K01462	J	21 kDa	9.2257e-05			7.6721e-05			0	9.2257e-05	7.6721e-05	0.831601	-0.266037	1	1
Pyrimidine-specific ribonucleoside hydrolase RihA	GWH15_03550	Metabolism	Nucleotide transport and metabolism	K01239	F	40 kDa	4.7542e-05			3.9536e-05			0	4.7542e-05	3.9536e-05	0.831602	-0.266036	1	1
N-acetylmuramoyl-L-alanine amidase AmiC	GWH15_15455	Cellular processing and signaling	Cell wall/membrane/envelope biogenesis	-	-	30 kDa	5.9057e-05			4.9112e-05			0	5.9057e-05	4.9112e-05	0.831603	-0.266032	1	1
putative bifunctional transcriptional activator/DNA repair enzyme AlkA	GWH15_00270	Information storage and processing	Replication, recombination and repair	K01247	L	28 kDa	0.00010159			8.4484e-05			0	0.00010159	8.4484e-05	0.831617	-0.266008	1	1
hypothetical protein	GWH15_06065	Information storage and processing	Transcription	-	T	11 kDa	0.00018352			0.00015262			0	0.00018352	0.00015262	0.831626	-0.265993	1	1
Serine/threonine-protein kinase PknD	GWH15_14080	Unclassified	Unclassified	-	G	31 kDa	0.00049012	0.00042465	0.00048509	0.00045553	0.00032986	0.00038018	0	0.00046662	0.000388523	0.832633	-0.264247	3	3
2-oxoisovalerate dehydrogenase subunit beta	GWH15_11580	Metabolism	Energy production and conversion	K11381	C	82 kDa	0.00010309	0.00014462	9.6367e-05	0.00014289	9.3613e-05	5.035e-05	0	0.000114692	9.56177e-05	0.833688	-0.26242	3	3
Putative ring-cleaving dioxygenase MhqO	GWH15_16355	Metabolism	Amino acid transport and metabolism	K15975	Q	35 kDa	0.00018844	0.00028323	0.00027681	0.00024626	0.00022001	0.00015777	0	0.000249493	0.000208013	0.833743	-0.262325	3	3
hypothetical protein	GWH15_18235	Cellular processing and signaling	Cell wall/membrane/envelope biogenesis	K06142	M	23 kDa	0.0032002	0.0029661	0.0028846	0.0033582	0.0021794	0.0020095	0	0.00301697	0.0025157	0.833851	-0.262139	3	3
hypothetical protein	GWH15_09230	Poorly characterized	Function unknown	-	V	42 kDa	4.5272e-05	4.7631e-05	4.2319e-05	3.7648e-05			0	4.5074e-05	3.7648e-05	0.835249	-0.259722	3	1
hypothetical protein	GWH15_00025	Poorly characterized	Function unknown	-	-	21 kDa	9.4296e-05	9.9209e-05	8.8144e-05	7.8416e-05			0	9.3883e-05	7.8416e-05	0.835252	-0.259716	3	1
Iron-sulfur cluster insertion protein ErpA	GWH15_19160	Poorly characterized	Function unknown	K13628	O	17 kDa	0.00015516	0.00016324	0.00014504	0.00012903			0	0.00015448	0.00012903	0.835254	-0.259714	3	1
Methylxanthine N1-demethylase NdmA	GWH15_05095	Metabolism	Energy production and conversion	K03862	P	40 kDa	4.741e-05	4.988e-05	4.4317e-05	3.9426e-05			0	4.72023e-05	3.9426e-05	0.835255	-0.259711	3	1
Cobalt-zinc-cadmium resistance protein CzcC	GWH15_01890	Cellular processing and signaling	Cell wall/membrane/envelope biogenesis	K15725	M	48 kDa	3.844e-05	4.0443e-05	3.5933e-05	3.1967e-05			0	3.8272e-05	3.1967e-05	0.835258	-0.259706	3	1
hypothetical protein	GWH15_15160	Unclassified	Unclassified	-	-	42 kDa	0.0014294	0.0013692	0.001396	0.0017387	0.00076716	0.0010003	0	0.0013982	0.00116872	0.835875	-0.258641	3	3
Beta-barrel assembly-enhancing protease	GWH15_12375	Poorly characterized	Function unknown	-	-	34 kDa		8.365e-05	7.432e-05	6.6118e-05			0	7.8985e-05	6.6118e-05	0.837096	-0.256536	2	1
Cocaine esterase	GWH15_06220	Poorly characterized	Function unknown	K06978	R	61 kDa		3.2355e-05	2.8746e-05	2.5574e-05			0	3.05505e-05	2.5574e-05	0.837106	-0.256518	2	1
1-deoxy-D-xylulose 5-phosphate reductoisomerase	GWH15_14820	Metabolism	Lipid transport and metabolism	K00099	I	46 kDa	0.00023541	0.00035088	0.00023839	0.00014683	0.00025652	0.00028744	0	0.000274893	0.000230263	0.837646	-0.255587	3	3
Citrate synthase 2	GWH15_17575	Metabolism	Energy production and conversion	K01647	C	41 kDa	0.0015619	0.0013337	0.0012484	0.001073	0.0014059	0.00099498	0	0.00138133	0.00115796	0.838292	-0.254476	3	3
Homoserine dehydrogenase	GWH15_13845	Metabolism	Amino acid transport and metabolism	K00003	E	44 kDa	0.00074822	0.00095741	0.00058599	0.00057177	0.00076022	0.00059259	0	0.000763873	0.000641527	0.839834	-0.251824	3	3
Sorbitol dehydrogenase	GWH15_09545	Metabolism	Energy production and conversion	K00008	E	38 kDa	0.0001399	0.00029437	0.00028334	9.6949e-05	0.00026677	0.00023914	0	0.000239203	0.000200953	0.840093	-0.251379	3	3
Phosphoribosylformylglycinamidine cyclo-ligase	GWH15_01175	Metabolism	Nucleotide transport and metabolism	K01933	F	42 kDa	0.00010913	0.00020666	6.1205e-05	0.0001815	7.1347e-05	6.3957e-05	0	0.000125665	0.000105601	0.84034	-0.250955	3	3
hypothetical protein	GWH15_13685	Poorly characterized	Function unknown	-	I	24 kDa	0.0023705	0.0022638	0.0018409	0.0022442	0.0014902	0.0017099	0	0.0021584	0.00181477	0.840793	-0.250178	3	3
RNA polymerase sigma factor RpoD	GWH15_00505	Information storage and processing	Transcription	K03086	K	65 kDa	0.00025586	0.00017418	0.0002251	0.0003129	0.0001722	6.6157e-05	0	0.00021838	0.000183752	0.841434	-0.249078	3	3
hypothetical protein	GWH15_12860	Poorly characterized	Function unknown	-	G	76 kDa	8.7848e-05	0.00011883	0.00017596	0.00014611	0.00010256	7.3551e-05	0	0.000127546	0.000107407	0.842104	-0.24793	3	3
General stress protein 69	GWH15_03225	Metabolism	Energy production and conversion	K05882	R	38 kDa	0.00094269	0.0011484	0.0010203	0.00072204	0.0011353	0.0007633	0	0.00103713	0.000873547	0.842273	-0.24764	3	3
Bifunctional ligase/repressor BirA	GWH15_01325	Metabolism	Coenzyme transport and metabolism	K03524	H	29 kDa	0.00021488	0.00019378	0.00022956	0.00017869		0.00017991	0	0.00021274	0.0001793	0.842813	-0.246716	3	2
Succinyl-CoA ligase [ADP-forming] subunit alpha	GWH15_17830	Metabolism	Energy production and conversion	K01902	C	30 kDa	0.002883	0.0029119	0.0029105	0.0021817	0.002686	0.0024923	1	0.0029018	0.00245333	0.845452	-0.242205	3	3
Iron-sulfur cluster insertion protein ErpA	GWH15_01550	Poorly characterized	Function unknown	K13628	O	13 kDa	0.0004741	0.00042754	0.00069641	0.00045058			0	0.000532683	0.00045058	0.845868	-0.241495	3	1
Glutamine-dependent NAD(+) synthetase	GWH15_06190	Metabolism	Coenzyme transport and metabolism	K01950	R	60 kDa	0.0007073	0.00053385	0.00048868	0.00046032	0.00057804	0.00042805	0	0.00057661	0.000488803	0.847719	-0.238342	3	3
2-haloacrylate reductase	GWH15_09985	Metabolism	Energy production and conversion	K00344	C	32 kDa	0.00019458	0.00017547	0.0001559	0.00011558	0.00018174		0	0.000175317	0.00014866	0.847951	-0.237947	3	2
Putative oxidoreductase YdbC	GWH15_00385	Metabolism	Energy production and conversion	K00540	R	31 kDa	0.00026035	0.00027392	0.00027041	0.00014434	0.00028369	0.00025431	0	0.000268227	0.000227447	0.847964	-0.237924	3	3
1D-myo-inositol 2-acetamido-2-deoxy-alpha-D-glucopyranoside deacetylase	GWH15_13655	Poorly characterized	Function unknown	-	G	27 kDa	0.00052462	0.00044156	0.00055578	0.0003781	0.00040016	0.00051244	0	0.00050732	0.000430233	0.848051	-0.237777	3	3
Levodione reductase	GWH15_10470	Poorly characterized	Function unknown	K00059	I	26 kDa	0.00050003	0.00049101	0.00049857	0.0003881	0.00043589	0.00043958	1	0.000496537	0.00042119	0.848256	-0.237429	3	3
Aspartate aminotransferase	GWH15_18300	Metabolism	Amino acid transport and metabolism	K00812	E	22 kDa	0.0025899	0.0031268	0.0026193	0.0019419	0.0027064	0.0024261	0	0.00277867	0.00235813	0.848656	-0.236747	3	3
Indole-3-glycerol phosphate synthase	GWH15_00785	Metabolism	Amino acid transport and metabolism	K01609	E	28 kDa	0.00015981	0.00020176	0.00023901	0.00021263	0.00015672	0.00014049	0	0.000200193	0.000169947	0.848913	-0.236312	3	3
Release factor glutamine methyltransferase	GWH15_03275	Information storage and processing	Translation, ribosomal structure and biogenesis	K02493	J	31 kDa		9.5855e-05	0.00014194	0.00010102			0	0.000118898	0.00010102	0.849639	-0.235077	2	1
DNA gyrase subunit A	GWH15_19210	Information storage and processing	Replication, recombination and repair	K02469	L	110 kDa	0.0003577	0.0004301	0.00023883	0.00035412	0.00030625	0.00021214	0	0.00034221	0.000290837	0.849878	-0.234673	3	3
Carbonic anhydrase 1	GWH15_13040	Metabolism	Inorganic ion transport and metabolism	K01673	P	24 kDa	0.00052864	0.00047673	0.00031767	0.00025121	0.00043203	0.00044261	0	0.000441013	0.000375283	0.850957	-0.232842	3	3
Aminopeptidase	GWH15_15385	Poorly characterized	Function unknown	K01301	O	81 kDa	0.0014836	0.0011979	0.0010643	0.0011095	0.0013535	0.0007246	0	0.0012486	0.00106253	0.85098	-0.232803	3	3
hypothetical protein	GWH15_07945	Poorly characterized	Function unknown	-	M	45 kDa	0.00026165	0.00027528	0.00031983	0.00020085	0.00026318	0.00026541	0	0.000285587	0.000243147	0.851394	-0.232102	3	3
putative zinc protease	GWH15_07845	Cellular processing and signaling	Post-translational modification, protein turnover, and chaperones	K07263	R	57 kDa	0.00016733	0.00019365	0.00015641	0.00020873	0.0001094	0.00012258	0	0.000172463	0.000146903	0.851795	-0.231423	3	3
L-glyceraldehyde 3-phosphate reductase	GWH15_00360	Metabolism	Energy production and conversion	K05882	R	37 kDa	0.0013189	0.0016324	0.0017888	0.0012043	0.0013948	0.0014398	0	0.00158003	0.0013463	0.852071	-0.230955	3	3
Outer membrane porin F	GWH15_03310	Cellular processing and signaling	Cell wall/membrane/envelope biogenesis	K03286	M	56 kDa	0.00070163	0.00058368	0.00050333	0.0007463	0.00037338	0.00040643	0	0.000596213	0.000508703	0.853224	-0.229004	3	3
hypothetical protein	GWH15_14230	Cellular processing and signaling	Cell wall/membrane/envelope biogenesis	-	M	93 kDa	0.003457	0.0034604	0.0032222	0.0028666	0.0030512	0.0027352	1	0.00337987	0.00288433	0.853387	-0.228728	3	3
hypothetical protein	GWH15_13135	Metabolism	Amino acid transport and metabolism	-	O	34 kDa		6.0461e-05	0.00010743	7.1683e-05			0	8.39455e-05	7.1683e-05	0.853923	-0.227822	2	1
Superoxide dismutase-like protein YojM	GWH15_17890	Metabolism	Inorganic ion transport and metabolism	K04565	P	18 kDa	0.00069059	0.00041519	0.00055332	0.00065634		0.0002891	0	0.000553033	0.00047272	0.854777	-0.226381	3	2
Aminopeptidase	GWH15_02660	Metabolism	Amino acid transport and metabolism	K01271	E	44 kDa	0.00043875	0.00055394	0.00049216	0.00032838	0.00039443	0.00054643	0	0.00049495	0.00042308	0.854793	-0.226352	3	3
Transcriptional regulator MraZ	GWH15_14985	Poorly characterized	Function unknown	K03925	J	17 kDa	0.00017535	0.00018449	0.00049174	0.00024304			0	0.00028386	0.00024304	0.856197	-0.223986	3	1
1-pyrroline-5-carboxylate dehydrogenase 1	GWH15_05485	Metabolism	Energy production and conversion	K00294	C	57 kDa	0.0007669	0.00072102	0.00065586	0.00054277	0.00072009	0.00057378	0	0.000714593	0.000612213	0.85673	-0.223088	3	3
Arabinose 5-phosphate isomerase KdsD	GWH15_15805	Cellular processing and signaling	Cell wall/membrane/envelope biogenesis	K06041	G	34 kDa	5.2678e-05		9.8482e-05	4.3807e-05	8.6101e-05		0	7.558e-05	6.4954e-05	0.859407	-0.218586	2	2
RNA-binding protein Hfq	GWH15_15585	Information storage and processing	Transcription	K03666	T	13 kDa	0.0015317	0.001765	0.0017045	0.001577	0.00047687	0.0022442	0	0.00166707	0.00143269	0.859408	-0.218585	3	3
hypothetical protein	GWH15_12355	Poorly characterized	Function unknown	-	-	11 kDa	0.00064931		0.0010405	0.00069424	0.00075806		0	0.000844905	0.00072615	0.859446	-0.218522	2	2
Threonine synthase	GWH15_10440	Metabolism	Amino acid transport and metabolism	K01733	E	47 kDa	0.0001782	0.00020832	0.00029613	0.00027991	0.00016181	0.00014505	0	0.00022755	0.00019559	0.859547	-0.218351	3	3
hypothetical protein	GWH15_00410	Unclassified	Unclassified	-	-	25 kDa	7.2938e-05		6.818e-05	6.0655e-05			0	7.0559e-05	6.0655e-05	0.859635	-0.218204	2	1
Response regulator protein VraR	GWH15_07605	Cellular processing and signaling	Signal transduction mechanisms	K03412	T	23 kDa	8.2452e-05		7.7073e-05	6.8567e-05			0	7.97625e-05	6.8567e-05	0.85964	-0.218196	2	1
Lysine--tRNA ligase	GWH15_08210	Information storage and processing	Translation, ribosomal structure and biogenesis	K04567	J	68 kDa	0.00084773	0.0008027	0.001083	0.0010222	0.00083136	0.00049683	0	0.000911143	0.000783463	0.859868	-0.217812	3	3
Gluconate 5-dehydrogenase	GWH15_08000	Poorly characterized	Function unknown	K00046	I	28 kDa	0.00022713	0.00030725	9.0993e-05	0.00021587		0.00014263	0	0.000208458	0.00017925	0.859887	-0.217781	3	2
4-formylbenzenesulfonate dehydrogenase TsaC1/TsaC2	GWH15_08190	Poorly characterized	Function unknown	K01629	G	80 kDa	0.0019559	0.0019231	0.0016977	0.0019557	0.0018839	0.00097232	0	0.0018589	0.00160397	0.862862	-0.212799	3	3
hypothetical protein	GWH15_02675	Information storage and processing	Transcription	K02600	K	60 kDa	0.00053632	0.00073022	0.00050133	0.00070835	0.00054143	0.00027735	0	0.00058929	0.000509043	0.863825	-0.211189	3	3
hypothetical protein	GWH15_11380	Unclassified	Unclassified	-	-	46 kDa	0.0019912	0.0021805	0.0019943	0.0015376	0.0020923	0.0016969	0	0.00205533	0.0017756	0.863899	-0.211066	3	3
hypothetical protein	GWH15_15450	Poorly characterized	Function unknown	-	S	52 kDa	0.0010299	0.0015867	0.0012722	0.0012542	0.0010822	0.001024	0	0.00129627	0.00112013	0.864123	-0.210692	3	3
hypothetical protein	GWH15_16295	Unclassified	Unclassified	-	-	10 kDa	0.00029427		0.00055014	0.00032628	0.00048098	0.00028744	0	0.000422205	0.0003649	0.864272	-0.210443	2	3
Capsular glucan synthase	GWH15_02240	Metabolism	Carbohydrate transport and metabolism	K16148	G	44 kDa	0.00021228	0.00022334	0.00025796	0.00021184	0.00013879	0.00024883	0	0.000231193	0.00019982	0.864298	-0.210399	3	3
hypothetical protein	GWH15_06195	Cellular processing and signaling	Post-translational modification, protein turnover, and chaperones	-	O	36 kDa	0.00089567	0.00088999	0.00076747	0.0008276	0.00065065	0.00072908	0	0.000851043	0.000735777	0.864558	-0.209965	3	3
Phosphoheptose isomerase	GWH15_05255	Metabolism	Carbohydrate transport and metabolism	K03271	G	22 kDa	0.00046242	0.00048651	0.00043225	0.00041951	0.00034356	0.00043116	1	0.000460393	0.000398077	0.864645	-0.209821	3	3
Neutral endopeptidase	GWH15_17230	Cellular processing and signaling	Post-translational modification, protein turnover, and chaperones	K07386	O	76 kDa	0.00050561	0.00058385	0.00068012	0.00056404	0.0006047	0.00036138	0	0.00058986	0.00051004	0.86468	-0.209762	3	3
Glycine dehydrogenase (decarboxylating)	GWH15_17330	Metabolism	Amino acid transport and metabolism	K00281	E	104 kDa	0.00069862	0.00064198	0.00046292	0.00053685	0.00062153	0.00040167	0	0.000601173	0.000520017	0.865003	-0.209223	3	3
putative nicotinate-nucleotide pyrophosphorylase [carboxylating]	GWH15_01330	Metabolism	Coenzyme transport and metabolism	K00767	H	32 kDa	0.0014605	0.0013257	0.0013652	0.0011907	0.0013106	0.0010909	1	0.0013838	0.0011974	0.865298	-0.20873	3	3
Argininosuccinate lyase	GWH15_07100	Metabolism	Amino acid transport and metabolism	K01755	E	54 kDa	0.00039652	0.00050787	0.00040288	0.00048745	0.00036632	0.00027786	0	0.000435757	0.00037721	0.865644	-0.208155	3	3
Cell division protein ZapA	GWH15_02970	Poorly characterized	Function unknown	K09888	D	12 kDa	0.00051497	0.0004644	0.00048137	0.00024471	0.00048098	0.00053895	0	0.000486913	0.000421547	0.865753	-0.207973	3	3
[truncated: 841 more rows]
